# Supplementary material for: Transcriptomics of Temporal- versus Substrate-Specific Wood Decay in the Brown-Rot Fungus Fibroporia radiculosa
Source: MDPI journal article supplement (doi:10.3390/jof9101029), 2023-10-19
Supplement: s1 [file s1]

|              | Pine-30D-4 | Pine-30D-5 | Pine-30D-6 | Spruce-30D-4 | Spruce-30D-5 | Spruce-30D-6 | Aspen-5D-1 | Aspen-5D-2 | Aspen-5D-3 | Pine-5D-1 | Pine-5D-2 | Pine-5D-3 | Spruce-5D-2 | Spruce-5D-3 | Spruce-5D-1 |
|--------------|------------|------------|------------|--------------|--------------|--------------|------------|------------|------------|-----------|-----------|-----------|-------------|-------------|-------------|
| Pine-30D-4   | 1.00       | 0.84       | 0.92       | 0.72         | 0.71         | 0.79         | 0.24       | 0.23       | 0.19       | 0.32      | 0.20      | 0.24      | 0.24        | 0.20        | 0.18        |
| Pine-30D-5   | 0.84       | 1.00       | 0.87       | 0.96         | 0.94         | 0.96         | 0.20       | 0.19       | 0.24       | 0.30      | 0.17      | 0.21      | 0.31        | 0.22        | 0.23        |
| Pine-30D-6   | 0.92       | 0.87       | 1.00       | 0.82         | 0.83         | 0.88         | 0.19       | 0.19       | 0.20       | 0.28      | 0.17      | 0.21      | 0.25        | 0.19        | 0.19        |
| Spruce-30D-4 | 0.72       | 0.96       | 0.82       | 1.00         | 0.98         | 0.97         | 0.17       | 0.15       | 0.24       | 0.27      | 0.14      | 0.19      | 0.31        | 0.22        | 0.24        |
| Spruce-30D-5 | 0.71       | 0.94       | 0.83       | 0.98         | 1.00         | 0.98         | 0.18       | 0.17       | 0.24       | 0.27      | 0.15      | 0.20      | 0.32        | 0.22        | 0.24        |
| Spruce-30D-6 | 0.79       | 0.96       | 0.88       | 0.97         | 0.98         | 1.00         | 0.21       | 0.19       | 0.24       | 0.29      | 0.17      | 0.22      | 0.33        | 0.23        | 0.24        |
| Aspen-5D-1   | 0.24       | 0.20       | 0.19       | 0.17         | 0.18         | 0.21         | 1.00       | 0.96       | 0.44       | 0.93      | 0.96      | 0.89      | 0.80        | 0.85        | 0.62        |
| Aspen-5D-2   | 0.23       | 0.19       | 0.19       | 0.15         | 0.17         | 0.19         | 0.96       | 1.00       | 0.34       | 0.94      | 0.92      | 0.81      | 0.73        | 0.76        | 0.53        |
| Aspen-5D-3   | 0.19       | 0.24       | 0.20       | 0.24         | 0.24         | 0.24         | 0.44       | 0.34       | 1.00       | 0.54      | 0.57      | 0.67      | 0.64        | 0.70        | 0.83        |
| Pine-5D-1    | 0.32       | 0.30       | 0.28       | 0.27         | 0.27         | 0.29         | 0.93       | 0.94       | 0.54       | 1.00      | 0.93      | 0.88      | 0.79        | 0.83        | 0.66        |
| Pine-5D-2    | 0.20       | 0.17       | 0.17       | 0.14         | 0.15         | 0.17         | 0.96       | 0.92       | 0.57       | 0.93      | 1.00      | 0.95      | 0.86        | 0.92        | 0.74        |
| Pine-5D-3    | 0.24       | 0.21       | 0.21       | 0.19         | 0.20         | 0.22         | 0.89       | 0.81       | 0.67       | 0.88      | 0.95      | 1.00      | 0.91        | 0.96        | 0.86        |
| Spruce-5D-2  | 0.24       | 0.31       | 0.25       | 0.31         | 0.32         | 0.33         | 0.80       | 0.73       | 0.64       | 0.79      | 0.86      | 0.91      | 1.00        | 0.96        | 0.88        |
| Spruce-5D-3  | 0.20       | 0.22       | 0.19       | 0.22         | 0.22         | 0.23         | 0.85       | 0.76       | 0.70       | 0.83      | 0.92      | 0.96      | 0.96        | 1.00        | 0.92        |
| Spruce-5D-1  | 0.18       | 0.23       | 0.19       | 0.24         | 0.24         | 0.24         | 0.62       | 0.53       | 0.83       | 0.66      | 0.74      | 0.86      | 0.88        | 0.92        | 1.00        |

**Supplementary Figure S1. Pearson's correlation between samples.** Raw read counts were used as input for the calculation.

**Supplementary Table S1.** Reads alignments.

| Library      | Filtered reads | Mapped reads | Mapping rate |
|--------------|----------------|--------------|--------------|
| Pine-30D-4   | 10,907,540     | 9,914,794    | 90.90%       |
| Pine-30D-5   | 12,340,565     | 11,330,711   | 91.82%       |
| Pine-30D-6   | 12,073,619     | 10,942,616   | 90.63%       |
| Spruce-30D-6 | 16,813,935     | 15,302,579   | 91.01%       |
| Spruce-30D-5 | 16,628,360     | 15,147,650   | 91.10%       |
| Spruce-30D-5 | 12,821,901     | 11,548,856   | 90.07%       |
| Aspen-5D-1   | 17,252,636     | 13,652,388   | 79.13%       |
| Aspen-5D-2   | 19,275,033     | 17,453,461   | 90.55%       |
| Aspen-5D-3   | 18,703,720     | 14,026,912   | 75.00%       |
| Pine-5D-1    | 17,455,078     | 13,796,245   | 79.04%       |
| Pine-5D-2    | 16,634,692     | 14,257,903   | 85.71%       |
| Pine-5D-3    | 19,833,307     | 16,220,407   | 81.78%       |
| Spruce-5D-2  | 15,978,872     | 13,239,527   | 82.86%       |
| Spruce-5D-3  | 16,299,746     | 13,490,015   | 82.76%       |
| Spruce-5D-1  | 14,994,961     | 10,939,960   | 72.96%       |

**Supplementary Table S2.** Annotation of genes involved in Fenton reaction. We define orthologs as members of Markov clustering and homologs as BLASTp hits (E value cutoff 1E-5). The CAZy, Enzyme Commission (EC), and Pfam annotations are available in the MycoCosm (<https://mycocosm.jgi.doe.gov/>).

| Pathway                                             | Name                         | Annotation                                                  |
|-----------------------------------------------------|------------------------------|-------------------------------------------------------------|
| Quinone redox cycling and hydroquinone biosynthesis | Quinone reductase            | CAZy:AA6                                                    |
|                                                     | Phenol monooxygenase         | EC:1.14.13.7                                                |
|                                                     | Aromatic ring monooxygenase  | Orthologs of Posp11 54109, Posp11 23052, and Posp11 129128  |
|                                                     | Phenylalanine ammonia-lyase  | Pfam:PF00221                                                |
|                                                     | O-methyltransferase          | EC:2.1.1.64                                                 |
| Fe <sup>3+</sup> reduction to Fe <sup>2+</sup>      | Glycopeptides                | Homologs of Phchr2 3023986 (glp1) and Phchr2 3023982 (glp2) |
| H <sub>2</sub> O <sub>2</sub> generation            | Aryl-alcohol oxidase         | CAZy:AA3_2*                                                 |
|                                                     | Alcohol oxidase              | CAZy:AA3_3                                                  |
|                                                     | Glyoxal oxidase              | CAZy:AA5_1                                                  |
|                                                     | Copper radical oxidases      | CAZy:AA5_2                                                  |
|                                                     | Amino acid Amine oxidases    | Orthologs of Posp11 47008 and Posp11 110689                 |
| Iron reduction and homeostasis genes                | Ferric iron reductase        | Pfam:PF08030,PF01794                                        |
|                                                     | Iron permease                | Pfam:PF03239                                                |
|                                                     | Fe <sup>2+</sup> transporter | Orthologs of Posp11 52765 and Posp11 43266                  |
|                                                     | Ferroxidase                  | CAZy:AA1_2                                                  |
| Oxalate metabolism                                  | Glyoxylate dehydrogenase     | Orthologs of Posp11 121561 and Posp11 115965                |
|                                                     | Oxaloacetate acetylhydrolase | Orthologs of Posp11 112832                                  |
|                                                     | Oxalate decarboxylase        | Orthologs of Posp11 46778                                   |

\*AA3\_2 family has eight subgroups of which one subgroup has aryl-alcohol oxidase activity. See the methods in the main text.

**Supplementary Table S3.** Brown rot fungal genomes for comparative analysis. Each genome portal can be accessible via [https://mycocosm.jgi.doe.gov/\[PORTAL\\_ID\]](https://mycocosm.jgi.doe.gov/[PORTAL_ID]).

| Strain                                              | Portal ID in MycoCosm | Genome paper<br>(Pubmed ID) |
|-----------------------------------------------------|-----------------------|-----------------------------|
| <i>Daedalea quercina</i>                            | Daequ1                | 26659563                    |
| <i>Fomitopsis pinicola</i> FP-58527 SS1             | Fompi3                | 22745431                    |
| <i>Laetiporus sulphureus</i> var. <i>sulphureus</i> | Laesu1                | 26659563                    |
| <i>Postia placenta</i> MAD-698-R-SB12               | PosplRSB12_1          | 28831381                    |
| <i>Wolfiporia cocos</i> MD-104 SS10                 | Wolco1                | 22745431                    |

**Supplementary Table S4.** The genes involved in Fenton reaction up-regulated during early decay reported in *Postia placenta*, and their orthologs also up-regulated in submerged ground wood in *Fibroporia radiculosa*. The genes with a false discovery rate <0.05 and fold change >4 are assigned as differentially expressed (same as performed in the *P. placenta* study).

| Gene family                   | <i>P. placenta</i> in early decay<br>(reported by Zhang et al.) | <i>F. radiculosa</i> in ground wood<br>(observed in this study) |
|-------------------------------|-----------------------------------------------------------------|-----------------------------------------------------------------|
| Glucose oxidase               | 44331                                                           | 657                                                             |
| Alcohol oxidase               | 128830                                                          | 3364                                                            |
|                               | 55972                                                           | 6239                                                            |
|                               | 129158/126217                                                   |                                                                 |
| Glyoxal oxidase               | 46390                                                           | 5062**                                                          |
| Amino acid/amine oxidase      | 47008                                                           | 2469*                                                           |
| Amino acid/amine oxidase      | 110689                                                          | 1927                                                            |
| Iron reductase                | 130025                                                          | 2484*                                                           |
| Iron reductase                | 130030/130043                                                   | -                                                               |
| Fe <sup>2+</sup> transporters | 52765/43266                                                     | -                                                               |
| Benzoquinone reductase        | 124517/64069                                                    | 8914                                                            |
| Phenylalanine ammonia-lyase   | 111514                                                          | 6596                                                            |
| Aromatic ring monooxygenases  | 54109/46071                                                     | 1441                                                            |
|                               | 23052/62058                                                     | 4445                                                            |
|                               | 129128                                                          |                                                                 |

\*They are differentially expressed (false discovery rate <0.05), but have fold change values from two to four.

\*\*The genes are not in the same gene family, but they are annotated having the same function and are reciprocal best hit in the BLAST alignment.

**Supplementary Table S5.** The genes encoding plant cell wall-degrading enzymes up-regulated in late decay reported in *Postia placenta*, and their orthologs also up-regulated in wood wafers in *Fibroporia radiculosa*. The genes with a false discovery rate <0.05 and fold change >4 are assigned as differentially expressed (same as performed in the *P. placenta* study).

| Gene family           | <i>P. placenta</i> in late decay<br>(reported by Zhang et al.) | <i>F. radiculosa</i> in 30 days<br>(observed in this study) |
|-----------------------|----------------------------------------------------------------|-------------------------------------------------------------|
| Endoglucanases Cel5A  | 115648/108962                                                  | 3096                                                        |
| Endoglucanases Cel5B  | 103675/117690                                                  | 3097                                                        |
|                       |                                                                | 4239                                                        |
| Endoglucanases Cel12A | 121191/112658                                                  | 9027                                                        |
|                       |                                                                | 3175                                                        |
| Xylanase Xyn10A-1     | 113670/90657                                                   | 1548                                                        |
|                       |                                                                | 1546*                                                       |
|                       |                                                                | 1549*                                                       |
| Mannanase Man5A       | 57321/121831                                                   | 1048                                                        |
|                       |                                                                | 2871                                                        |

\*They are differentially expressed (false discovery rate <0.05), but have lower fold change values from two to four.
