# Supplementary material for: Transcriptomics of Temporal- versus Substrate-Specific Wood Decay in the Brown-Rot Fungus Fibroporia radiculosa
Source: J Fungi (Basel). 2023 Oct 19;9(10):1029. doi: 10.3390/jof9101029 (PMC10608345; doi:10.3390/jof9101029)
Supplement: Supplementary file 1 [file jof-09-01029-s001.zip]

Archive with 4 entries (4 files):
- Fibra transcriptome Supp Data v1.7.xlsx
- __MACOSX/._Fibra transcriptome Supp Data v1.7.xlsx
- Fibra transcriptome Supp Figures and Tables v1.9.pdf
- __MACOSX/._Fibra transcriptome Supp Figures and Tables v1.9.pdf
