# Supplementary material for: Transcriptomics of Temporal- versus Substrate-Specific Wood Decay in the Brown-Rot Fungus Fibroporia radiculosa
Source: J Fungi (Basel). 2023 Oct 19;9(10):1029. doi: 10.3390/jof9101029 (PMC10608345; doi:10.3390/jof9101029)
Supplement: Supplementary file 1 [file jof-09-01029-s001.zip › Fibra transcriptome Supp Data v1.7.xlsx]

## Sheet: DGE
Supplementary Data S1. Differential gene expression of Fibroporia radiculosa. The "-" values indicate "Not available" in the DESeq2 result.
Protein_ID	Pfam	TF	CYP450	CAZy	Secreted	KEGG pathway	Transporter	Protease	SM	GO	EC	Is_Fenton	Pine-5D-vs- Aspen-5D log2FC	Pine-5D-vs- Aspen-5D Padj	Pine-5D-vs- Spruce-5D log2FC	Pine-5D-vs- Spruce-5D Padj	Pine-30D-vs- Spruce-30D log2FC	Pine-30D-vs- Spruce-30D Padj	Aspen-5D-vs- Spruce-5D log2FC	Aspen-5D-vs- Spruce-5D Padj	Pine-5D-vs- Pine-30D log2FC	Pine-5D-vs- Pine-30D Padj	Spruce-5D-vs- Spruce-30D log2FC	Spruce-5D-vs- Spruce-30D Padj
1	-	-	-	-	-	-	-	-	-	-	-	-	-1.3	0.35	-0.39	0.6	-0.12	0.95	0.87	0.18	-2.8	2.1e-08	-2.6	4.6e-07
2	PF08569:Mo25-like	-	-	-	-	-	-	-	-	GO:0005488,binding	-	-	0.17	1	-0.52	0.016	-0.11	0.85	-0.69	0.00086	-0.021	0.93	0.4	0.032
3	PF13561:Enoyl-(Acyl carrier protein) reductase	-	-	-	S	-	-	-	-	GO:0008152,metabolic process; GO:0016491,oxidoreductase activity; GO:0003824,catalytic activity; GO:0005488,binding; GO:0047038,D-arabinitol 2-dehydrogenase activity	1.1.1.250	-	0.47	1	-1.6	0.0049	0.11	0.96	-2.1	0.00014	0.52	0.32	2.2	3e-06
4	PF01014:Uricase; PF01014:Uricase	-	-	-	-	-	-	-	-	GO:0004846,urate oxidase activity; GO:0006144,purine base metabolic process	-	-	-0.25	1	-0.58	0.061	0.3	0.58	-0.33	0.31	-0.86	0.00069	0.025	0.94
5	-	-	-	-	-	-	-	-	-	-	-	-	0.00022	1	0.64	0.0078	-0.059	0.94	0.64	0.0079	-0.3	0.15	-1	4.9e-07
6	PF09335:SNARE associated Golgi protein	-	-	-	-	-	-	-	-	-	-	-	0.19	0.98	0.056	0.83	0.62	0.0065	-0.13	0.58	-0.34	0.051	0.22	0.24
7	PF12697:Alpha/beta hydrolase family	-	-	-	-	-	-	-	-	-	-	-	-0.18	0.94	0.25	0.16	0.24	0.33	0.43	0.01	-0.7	1.4e-07	-0.72	1.8e-07
8	-	-	-	-	-	-	-	-	-	-	-	-	0.014	1	0.074	0.83	0.72	0.023	0.06	0.87	0.84	0.00016	1.5	2.6e-11
9	PF14608:RNA-binding, Nab2-type zinc finger; PF00642:Zinc finger C-x8-C-x5-C-x3-H type (and similar); PF00642:Zinc finger C-x8-C-x5-C-x3-H type (and similar)	-	-	-	S	-	-	-	-	GO:0003676,nucleic acid binding; GO:0008270,zinc ion binding	-	-	0.31	1	0.048	0.93	1.2	0.0051	-0.26	0.61	-4.4	3.4e-40	-3.2	3.3e-21
10	-	-	-	-	-	-	-	-	-	-	-	-	-0.52	0.83	1.3	0.0062	0.36	0.63	1.8	3.8e-05	-0.61	0.066	-1.6	0.00011
11	PF00097:Zinc finger, C3HC4 type (RING finger)	-	-	-	-	-	-	-	-	GO:0005515,protein binding; GO:0008270,zinc ion binding	-	-	0.019	1	-0.25	0.39	0.16	0.8	-0.27	0.35	0.36	0.12	0.76	0.00061
12	PF13850:Endoplasmic Reticulum-Golgi Intermediate Compartment (ERGIC); PF07970:Endoplasmic reticulum vesicle transporter	-	-	-	S	-	-	-	-	-	-	-	0.11	1	-0.21	0.2	-0.059	0.9	-0.33	0.04	0.72	2.6e-08	0.88	9.7e-12
13	PF04005:Hus1-like protein	-	-	-	-	-	-	-	-	-	-	-	-0.17	1	0.21	0.59	-0.035	0.98	0.38	0.29	1.1	6.9e-05	0.89	0.0022
14	PF00857:Isochorismatase family	-	-	-	-	-	-	-	-	GO:0003824,catalytic activity; GO:0008152,metabolic process	-	-	-0.88	0.67	-1.3	0.02	0.11	0.95	-0.4	0.52	-0.7	0.14	0.69	0.15
15	-	-	-	-	-	-	-	-	-	-	-	-	0.48	-	0.57	-	1	-	0.089	0.94	-1.1	0.086	-0.69	0.41
16	PF02545:Maf-like protein	-	-	-	-	-	-	-	-	-	-	-	0.019	1	0.039	0.88	0.031	0.96	0.02	0.94	-0.27	0.091	-0.28	0.088
17	-	-	-	-	-	-	-	-	-	-	-	-	0.24	1	0.21	0.71	-0.39	0.66	-0.028	0.97	0.33	0.43	-0.27	0.52
18	PF00085:Thioredoxin; PF00462:Glutaredoxin	-	-	-	-	-	-	-	-	GO:0009055,electron carrier activity; GO:0015035,protein disulfide oxidoreductase activity; GO:0045454,cell redox homeostasis	-	-	-0.0091	1	0.32	0.32	-0.47	0.28	0.33	0.3	0.69	0.006	-0.1	0.73
19	PF03731:Ku70/Ku80 N-terminal alpha/beta domain; PF02735:Ku70/Ku80 beta-barrel domain	-	-	-	-	-	-	-	-	GO:0003677,DNA binding; GO:0004003,ATP-dependent DNA helicase activity; GO:0005634,nucleus; GO:0006303,double-strand break repair via nonhomologous end joining; GO:0005958,DNA-dependent protein kinase complex; GO:0005488,binding	-	-	0.056	1	0.91	0.01	0.012	0.99	0.86	0.017	0.21	0.53	-0.69	0.024
20	PF00278:Pyridoxal-dependent decarboxylase, C-terminal sheet domain; PF03095:Phosphotyrosyl phosphate activator (PTPA) protein; PF02784:Pyridoxal-dependent decarboxylase, pyridoxal binding domain	-	-	-	-	Urea cycle and metabolism of amino groups; Arginine and proline metabolism; Alkaloid biosynthesis II	-	-	-	GO:0003824,catalytic activity; GO:0006596,polyamine biosynthetic process; GO:0019211,phosphatase activator activity; GO:0004586,ornithine decarboxylase activity	4.1.1.17	-	0.61	0.29	0.095	0.8	0.26	0.63	-0.52	0.076	1.3	3.4e-08	1.5	4.4e-10
21	-	-	-	-	-	-	-	-	-	GO:0004182,carboxypeptidase A activity; GO:0006508,proteolysis; GO:0008270,zinc ion binding	-	-	0.45	-	0.64	-	-0.71	-	0.19	0.91	1.6	0.11	0.3	0.79
22	-	-	-	-	-	-	-	-	-	-	-	-	-0.64	-	-0.43	-	-1.4	-	0.21	0.92	2	0.062	1	0.41
23	PF10602:26S proteasome subunit RPN7; PF01399:PCI domain	-	-	-	-	-	-	-	-	GO:0004298,threonine endopeptidase activity; GO:0004299,proteasome endopeptidase activity	3.4.25.1	-	-0.13	0.99	-0.54	0.0001	-0.023	0.96	-0.41	0.0045	0.034	0.82	0.55	6.3e-06
24	-	-	-	-	S	-	-	-	-	-	-	-	-	-	-	-	-	-	-	-	-	-	-	-
25	-	-	-	-	-	-	-	-	-	-	-	-	-	-	-	-	-	-	-	-	-	-	-	-
26	-	-	-	-	-	-	-	-	-	-	-	-	1	-	-0.24	-	-0.088	-	-1.3	0.32	0.6	0.6	0.76	0.49
27	-	-	-	-	S	-	-	-	-	-	-	-	1.3	-	0.01	-	-0.69	-	-1.3	0.34	-1	0.38	-1.7	0.16
28	-	-	-	-	S	-	-	-	-	-	-	-	-	-	-	-	-	-	-	-	-	-	-	-
29	PF13410:Glutathione S-transferase, C-terminal domain; PF13417:Glutathione S-transferase, N-terminal domain	-	-	-	-	-	-	-	-	-	-	-	-0.15	1	-0.48	0.34	0.34	0.72	-0.33	0.54	-0.5	0.21	0.32	0.45
30	PF04969:CS domain; PF05002:SGS domain	-	-	-	-	-	-	-	-	-	-	-	-0.3	1	-0.083	0.86	-0.53	0.32	0.22	0.61	0.15	0.67	-0.3	0.36
31	PF00186:Dihydrofolate reductase	-	-	-	S	One carbon pool by folate; Folate biosynthesis	-	-	-	GO:0004146,dihydrofolate reductase activity; GO:0006545,glycine biosynthetic process; GO:0009165,nucleotide biosynthetic process	1.5.1.3	-	0.73	0.78	-0.077	0.91	-1.1	0.05	-0.8	0.12	-1.5	0.0002	-2.5	2.1e-10
32	PF00149:Calcineurin-like phosphoesterase; PF16891:Serine-threonine protein phosphatase N-terminal domain	-	-	-	-	-	-	-	-	GO:0016787,hydrolase activity; GO:0004721,phosphoprotein phosphatase activity; GO:0004723,calcium-dependent protein serine/threonine phosphatase activity; GO:0004724,magnesium-dependent protein serine/threonine phosphatase activity; GO:0005963,magnesium-dependent protein serine/threonine phosphatase complex; GO:0008420,CTD phosphatase activity; GO:0008597,calcium-dependent protein serine/threonin…	3.1.3.16	-	0.079	1	-0.12	0.59	0.28	0.32	-0.2	0.34	-0.25	0.13	0.15	0.38
33	PF16205:Ribosomal_S17 N-terminal; PF00366:Ribosomal protein S17	-	-	-	S	-	-	-	-	GO:0003735,structural constituent of ribosome; GO:0005622,intracellular; GO:0005840,ribosome; GO:0006412,translation	-	-	-0.15	1	1	0.079	-0.048	0.98	1.2	0.04	1.5	0.0012	0.45	0.38
34	-	-	-	-	-	-	-	-	-	-	-	-	-	-	-	-	-	-	-	-	-	-	-	-
35	PF00078:Reverse transcriptase (RNA-dependent DNA polymerase)	-	-	-	-	-	-	-	-	GO:0003723,RNA binding; GO:0003964,RNA-directed DNA polymerase activity; GO:0006278,RNA-dependent DNA replication	-	-	-	-	-	-	-	-	-	-	-	-	-	-
36	-	-	-	-	-	-	-	-	-	-	-	-	0.15	1	1.6	0.0044	-0.17	0.93	1.5	0.011	1.7	0.00044	-0.1	0.86
37	PF00172:Fungal Zn(2)-Cys(6) binuclear cluster domain	TF	-	-	-	-	-	-	-	GO:0003700,transcription factor activity; GO:0005634,nucleus; GO:0006355,regulation of transcription, DNA-dependent; GO:0008270,zinc ion binding	-	-	0.34	1	-0.29	0.71	0.043	0.98	-0.63	0.38	-0.68	0.22	-0.35	0.56
38	PF03443:Glycosyl hydrolase family 61	-	-	AA9	S	-	-	-	-	-	-	-	-0.43	1	-2.1	0.00015	-0.8	0.36	-1.7	0.0035	-5.1	4.8e-28	-3.8	1.5e-16
39	PF12937:F-box-like	-	-	-	S	-	-	-	-	-	-	-	-1.6	0.42	-1.3	0.12	0.022	0.99	0.26	0.81	-1.2	0.11	0.2	0.81
40	PF02148:Zn-finger in ubiquitin-hydrolases and other protein; PF17807:Variant UBP zinc finger; PF00443:Ubiquitin carboxyl-terminal hydrolase; PF00627:UBA/TS-N domain	-	-	-	S	-	-	MER254728	-	GO:0004221,ubiquitin thiolesterase activity; GO:0006511,ubiquitin-dependent protein catabolic process; GO:0008270,zinc ion binding	3.1.2.15	-	0.22	1	0.045	0.91	0.51	0.26	-0.18	0.63	2.2	2.2e-19	2.7	2.6e-27
41	PF00627:UBA/TS-N domain; PF00443:Ubiquitin carboxyl-terminal hydrolase	-	-	-	-	-	-	MER254728	-	GO:0004221,ubiquitin thiolesterase activity; GO:0006511,ubiquitin-dependent protein catabolic process	-	-	0.39	0.94	0.21	0.62	-0.32	0.64	-0.17	0.69	0.7	0.023	0.16	0.64
42	PF00956:Nucleosome assembly protein (NAP)	-	-	-	-	-	-	-	-	GO:0005634,nucleus; GO:0006334,nucleosome assembly	-	-	-0.00092	1	0.29	0.4	0.029	0.98	0.29	0.4	1	0.00013	0.73	0.0059
43	PF10497:Zinc-finger domain of monoamine-oxidase A repressor R1	-	-	-	S	Starch and sucrose metabolism	-	-	-	GO:0004339,glucan 1,4-alpha-glucosidase activity	3.2.1.3	-	0.17	1	0.3	0.38	0.064	0.95	0.13	0.74	1.3	1.9e-07	1.1	2.3e-05
44	-	-	-	-	-	-	-	-	-	-	-	-	0.14	1	-0.25	0.36	0.021	0.98	-0.39	0.13	0.23	0.32	0.5	0.021
45	PF00702:haloacid dehalogenase-like hydrolase	-	-	-	-	-	-	-	-	GO:0008152,metabolic process; GO:0016787,hydrolase activity; GO:0003824,catalytic activity; GO:0019120,hydrolase activity, acting on acid halide bonds, in C-halide compounds	-	-	-0.092	1	-0.88	0.0096	-0.31	0.62	-0.78	0.021	-0.78	0.006	-0.22	0.47
46	PF00383:Cytidine and deoxycytidylate deaminase zinc-binding region	-	-	-	-	Pyrimidine metabolism	-	-	-	GO:0008270,zinc ion binding; GO:0016787,hydrolase activity; GO:0003824,catalytic activity; GO:0004131,cytosine deaminase activity	3.5.4.1	-	0.025	1	-0.35	0.23	-0.32	0.49	-0.38	0.19	-1	6e-06	-0.99	1.3e-05
47	PF00743:Flavin-binding monooxygenase-like	-	-	-	-	-	-	-	-	GO:0016491,oxidoreductase activity; GO:0050660,FAD binding; GO:0006118,electron transport; GO:0004499,flavin-containing monooxygenase activity	1.14.13.8	-	0.11	1	-0.47	0.17	-0.017	0.99	-0.58	0.08	-3.9	1.3e-52	-3.4	3.7e-41
48	PF00067:Cytochrome P450	-	CYP62	-	S	Tryptophan metabolism; Fatty acid metabolism; gamma-Hexachlorocyclohexane degradation	-	-	-	GO:0004497,monooxygenase activity; GO:0005506,iron ion binding; GO:0006118,electron transport; GO:0020037,heme binding; GO:0050381,unspecific monooxygenase activity	1.14.14.1	-	-0.31	1	-1.5	0.004	-0.033	0.98	-1.1	0.026	-2.1	8e-07	-0.66	0.14
49	-	-	-	-	-	-	-	-	-	-	-	-	-0.13	1	0.3	0.44	0.24	0.66	0.42	0.25	-1.6	1.6e-10	-1.6	1.7e-09
50	PF04408:Helicase associated domain (HA2); PF07717:Oligonucleotide/oligosaccharide-binding (OB)-fold; PF00271:Helicase conserved C-terminal domain; PF00270:DEAD/DEAH box helicase	-	-	-	-	Purine metabolism	-	-	-	GO:0003676,nucleic acid binding; GO:0004386,helicase activity; GO:0005524,ATP binding; GO:0008026,ATP-dependent helicase activity; GO:0004003,ATP-dependent DNA helicase activity; GO:0004004,ATP-dependent RNA helicase activity; GO:0008094,DNA-dependent ATPase activity; GO:0008186,RNA-dependent ATPase activity; GO:0015462,protein-transmembrane transporting ATPase activity; GO:0016887,ATPase activit…	3.6.1.3	-	0.16	1	0.037	0.88	0.58	0.0036	-0.12	0.57	-0.27	0.088	0.28	0.086
51	PF00622:SPRY domain; PF10607:CTLH/CRA C-terminal to LisH motif domain	-	-	-	-	-	-	-	-	-	-	-	0.14	1	-0.8	0.035	0.051	0.97	-0.94	0.011	0.78	0.014	1.6	1.1e-07
52	PF00067:Cytochrome P450	-	CYP62	-	-	-	-	-	-	GO:0004497,monooxygenase activity; GO:0005506,iron ion binding; GO:0006118,electron transport; GO:0020037,heme binding	-	-	0.066	1	0.35	0.22	0.15	0.82	0.28	0.34	-0.67	0.0026	-0.87	0.0001
53	PF00067:Cytochrome P450	-	CYP62	-	S	Flavonoids, stilbene and lignin biosynthesis	-	-	-	GO:0004497,monooxygenase activity; GO:0005506,iron ion binding; GO:0006118,electron transport; GO:0020037,heme binding; GO:0016711,flavonoid 3'-monooxygenase activity	1.14.13.21	-	-0.21	1	0.16	0.73	-0.037	0.97	0.38	0.36	-1.2	7e-05	-1.4	6.7e-06
54	PF00069:Protein kinase domain	-	-	-	-	-	-	-	-	GO:0004672,protein kinase activity; GO:0005524,ATP binding; GO:0006468,protein amino acid phosphorylation; GO:0004674,protein serine/threonine kinase activity	-	-	0.21	1	0.56	0.32	-0.14	-	0.35	0.57	-0.27	0.55	-0.97	0.029
55	-	-	-	-	-	-	-	-	-	-	-	-	-0.76	-	0.55	-	0.43	-	1.3	0.29	-0.22	0.84	-0.34	0.76
56	PF00067:Cytochrome P450	-	CYP62	-	S	Tryptophan metabolism; Fatty acid metabolism; gamma-Hexachlorocyclohexane degradation	-	-	-	GO:0004497,monooxygenase activity; GO:0005506,iron ion binding; GO:0006118,electron transport; GO:0020037,heme binding; GO:0050381,unspecific monooxygenase activity	1.14.14.1	-	2	0.00013	2.4	1.3e-07	-0.66	0.4	0.35	0.54	3.9	9.8e-23	0.9	0.035
57	PF00067:Cytochrome P450	-	CYP62	-	-	-	-	-	-	GO:0004497,monooxygenase activity; GO:0005506,iron ion binding; GO:0006118,electron transport; GO:0020037,heme binding	-	-	0.72	0.78	-0.027	0.97	-0.49	0.61	-0.75	0.14	1.9	4.5e-06	1.5	0.00047
58	PF17667:Fungal protein kinase	-	-	-	S	-	-	-	-	-	-	-	-0.031	1	0.95	0.0014	0.14	0.84	0.99	0.0009	-0.86	0.00012	-1.7	1.3e-11
59	PF01106:NifU-like domain; PF08712:Scaffold protein Nfu/NifU N terminal	-	-	-	-	-	-	-	-	GO:0005506,iron ion binding; GO:0016226,iron-sulfur cluster assembly; GO:0051536,iron-sulfur cluster binding	-	-	-0.1	1	0.37	0.11	0.26	0.49	0.48	0.035	-0.09	0.67	-0.2	0.32
60	PF00005:ABC transporter	-	-	-	-	-	-	-	-	GO:0005524,ATP binding; GO:0016887,ATPase activity; GO:0000166,nucleotide binding; GO:0017111,nucleoside-triphosphatase activity; GO:0006810,transport; GO:0016021,integral to membrane; GO:0042626,ATPase activity, coupled to transmembrane movement of substances	-	-	-0.25	0.98	-0.45	0.095	-0.057	0.95	-0.2	0.5	1	4.2e-06	1.4	9.1e-11
61	-	-	-	-	S	-	-	-	-	-	-	-	0	-	0	-	0.18	-	0	1	-0.24	0.81	0	1
62	PF00179:Ubiquitin-conjugating enzyme	-	-	-	-	-	-	-	-	GO:0019787,small conjugating protein ligase activity; GO:0043687,post-translational protein modification; GO:0051246,regulation of protein metabolic process; GO:0004842,ubiquitin-protein ligase activity; GO:0051438,regulation of ubiquitin-protein ligase activity; GO:0051440,regulation of ubiquitin-protein ligase activity during meiotic cell cycle; GO:0051443,positive regulation of ubiquitin-prote…	6.3.2.19	-	-0.13	1	0.049	0.86	-0.14	0.75	0.18	0.44	-1.1	1.4e-10	-1.3	6.2e-14
63	PF03900:Porphobilinogen deaminase, C-terminal domain; PF01379:Porphobilinogen deaminase, dipyromethane cofactor binding domain	-	-	-	-	-	-	-	-	GO:0004418,hydroxymethylbilane synthase activity; GO:0033014,tetrapyrrole biosynthetic process	2.5.1.61	-	-0.17	1	-0.31	0.25	-0.047	0.96	-0.14	0.65	0.97	4.8e-06	1.2	4.3e-09
64	PF05348:Proteasome maturation factor UMP1	-	-	-	-	-	-	-	-	-	-	-	-0.09	1	0.2	0.44	-0.36	0.28	0.29	0.24	-0.39	0.049	-0.94	6.1e-07
65	PF10250:GDP-fucose protein O-fucosyltransferase	-	-	GT33	S	N-Glycans biosynthesis	-	-	-	GO:0003677,DNA binding; GO:0009058,biosynthetic process; GO:0005215,transporter activity; GO:0005488,binding; GO:0006810,transport; GO:0004578,chitobiosyldiphosphodolichol beta-mannosyltransferase activity	2.4.1.142	-	-0.069	1	0.19	0.49	0.09	0.9	0.26	0.32	0.5	0.015	0.4	0.057
66	PF05406:WGR domain; PF02877:Poly(ADP-ribose) polymerase, regulatory domain; PF00644:Poly(ADP-ribose) polymerase catalytic domain	-	-	-	-	-	-	-	-	GO:0003950,NAD+ ADP-ribosyltransferase activity; GO:0005634,nucleus; GO:0006471,protein amino acid ADP-ribosylation	2.4.2.30	-	0.011	1	0.22	0.48	0.072	0.95	0.2	0.51	1.9	1.7e-16	1.8	3.1e-14
67	PF02469:Fasciclin domain; PF02469:Fasciclin domain	-	-	-	S	-	-	-	-	-	-	-	-0.11	1	-0.32	0.55	-0.17	0.91	-0.2	0.72	0.56	0.19	0.71	0.089
68	PF06991:Microfibril-associated/Pre-mRNA processing	-	-	-	-	-	-	-	-	GO:0005576,extracellular region; GO:0003755,peptidyl-prolyl cis-trans isomerase activity; GO:0004600,cyclophilin; GO:0030051,FK506-sensitive peptidyl-prolyl cis-trans isomerase; GO:0042027,cyclophilin-type peptidyl-prolyl cis-trans isomerase activity	5.2.1.8	-	0.28	0.66	0.084	0.69	0.21	0.57	-0.19	0.3	1.2	1e-14	1.3	4e-17
69	PF01243:Pyridoxamine 5'-phosphate oxidase	-	-	-	-	-	-	-	-	GO:0010181,FMN binding	-	-	0.07	1	-0.45	0.48	-0.29	0.85	-0.52	0.41	6.3	2e-41	6.4	1.8e-44
70	PF01243:Pyridoxamine 5'-phosphate oxidase	-	-	-	-	-	-	-	-	GO:0031177,phosphopantetheine binding; GO:0010181,FMN binding	-	-	-0.3	1	-1.7	0.00029	0.21	0.87	-1.4	0.0041	-0.038	0.94	1.8	4.1e-06
71	PF01243:Pyridoxamine 5'-phosphate oxidase	-	-	-	-	-	-	-	-	GO:0010181,FMN binding	-	-	-0.36	0.98	0.083	0.87	-0.41	0.54	0.44	0.26	2.3	1.1e-13	1.8	6.5e-09
72	PF01243:Pyridoxamine 5'-phosphate oxidase	-	-	-	-	-	-	-	-	GO:0010181,FMN binding	-	-	0.6	0.78	-1	0.016	-0.18	0.87	-1.6	3.3e-05	-0.077	0.85	0.74	0.036
73	PF00271:Helicase conserved C-terminal domain; PF00270:DEAD/DEAH box helicase	-	-	-	S	Starch and sucrose metabolism; Folate biosynthesis	-	-	-	GO:0003676,nucleic acid binding; GO:0004386,helicase activity; GO:0005524,ATP binding; GO:0008026,ATP-dependent helicase activity; GO:0000810,diacylglycerol pyrophosphate phosphatase activity; GO:0004787,thiamin-pyrophosphatase activity; GO:0008413,8-oxo-7,8-dihydroguanine triphosphatase activity; GO:0008758,UDP-2,3-diacylglucosamine hydrolase activity; GO:0008796,bis(5'-nucleosyl)-tetraphosphata…	3.6.1.-	-	-0.086	1	0.66	0.045	-0.079	0.94	0.74	0.021	0.32	0.26	-0.42	0.14
74	PF00378:Enoyl-CoA hydratase/isomerase	-	-	-	-	Fatty acid metabolism; beta-Alanine metabolism; Tryptophan metabolism; Lysine degradation; Fatty acid biosynthesis (path 2); Benzoate degradation via CoA ligation; Butanoate metabolism; Valine, leucine and isoleucine degradation; Propanoate metabolism	-	-	-	GO:0003824,catalytic activity; GO:0008152,metabolic process; GO:0004300,enoyl-CoA hydratase activity	4.2.1.17	-	-0.21	0.94	-0.037	0.89	0.032	0.96	0.17	0.42	-0.16	0.35	-0.092	0.62
75	PF03416:Peptidase family C54	-	-	-	-	-	-	-	-	GO:0004197,cysteine-type endopeptidase activity	3.4.22.-	-	0.024	1	-0.24	0.26	0.36	0.2	-0.27	0.21	0.28	0.11	0.88	1.2e-07
76	PF00071:Ras family	-	-	-	-	-	-	-	-	GO:0005525,GTP binding; GO:0007264,small GTPase mediated signal transduction; GO:0005622,intracellular; GO:0015031,protein transport	-	-	-0.2	1	0.29	0.4	-0.15	0.85	0.49	0.13	0.26	0.34	-0.18	0.54
77	PF11326:Protein of unknown function (DUF3128)	-	-	-	-	-	-	-	-	-	-	-	-0.11	1	0.61	0.052	0.21	0.74	0.73	0.018	-0.82	0.0011	-1.2	1.5e-06
78	PF13738:Pyridine nucleotide-disulphide oxidoreductase	-	-	-	-	-	-	-	-	GO:0006118,electron transport; GO:0016491,oxidoreductase activity; GO:0050660,FAD binding; GO:0004499,flavin-containing monooxygenase activity	1.14.13.8	-	0.4	0.91	-0.19	0.65	-0.26	0.72	-0.59	0.091	0.67	0.021	0.59	0.043
79	PF01237:Oxysterol-binding protein; PF00169:PH domain; PF12796:Ankyrin repeats (3 copies)	-	-	-	-	-	-	-	-	GO:0008202,steroid metabolic process	-	-	0.1	1	-0.22	0.39	0.067	0.93	-0.32	0.18	0.92	1.2e-06	1.2	1.4e-10
80	PF07690:Major Facilitator Superfamily	-	-	-	-	-	-	-	-	-	-	-	-0.63	0.98	0.15	0.87	0.33	0.85	0.78	0.29	-1	0.071	-0.86	0.15
81	PF04468:PSP1 C-terminal conserved region	-	-	-	-	-	-	-	-	-	-	-	0.15	1	-0.84	0.093	0.2	0.88	-0.99	0.044	0.039	0.94	1.1	0.0085
82	-	-	-	-	-	-	-	-	-	-	-	-	-	-	-	-	-	-	-	-	-	-	-	-
83	-	-	-	-	-	-	-	-	-	-	-	-	1.5	-	2.6	-	-0.25	-	1.1	0.28	-0.34	0.7	-3.2	0.00099
84	PF13976:GAG-pre-integrase domain; PF07727:Reverse transcriptase (RNA-dependent DNA polymerase); PF00665:Integrase core domain; PF14223:gag-polypeptide of LTR copia-type	-	-	-	-	-	-	-	-	GO:0003677,DNA binding; GO:0015074,DNA integration; GO:0003676,nucleic acid binding	-	-	-	-	-	-	-	-	-	-	-	-	-	-
85	PF00118:TCP-1/cpn60 chaperonin family	-	-	-	-	-	-	-	-	GO:0005515,protein binding; GO:0005524,ATP binding; GO:0044267,cellular protein metabolic process; GO:0006457,protein folding; GO:0051082,unfolded protein binding; GO:0003763,chaperonin ATPase activity; GO:0016465,chaperonin ATPase complex	3.6.4.9	-	-0.12	1	0.34	0.28	0.23	0.7	0.46	0.13	0.69	0.0047	0.58	0.02
86	PF10300:Protein of unknown function (DUF3808)	-	-	-	-	-	-	-	-	-	-	-	0.11	1	0.33	0.059	0.19	0.56	0.22	0.22	1.3	1.9e-19	1.1	2.8e-15
87	PF01121:Dephospho-CoA kinase	-	-	-	-	Pantothenate and CoA biosynthesis	-	-	-	GO:0005524,ATP binding; GO:0004140,dephospho-CoA kinase activity	2.7.1.24	-	-0.13	1	0.18	0.62	-0.2	0.77	0.31	0.36	-0.21	0.45	-0.59	0.025
88	-	-	-	-	S	-	-	-	-	-	-	-	0.22	0.98	-0.074	0.81	0.24	0.57	-0.29	0.25	-2.4	1.2e-36	-2.1	1.3e-27
89	-	-	-	-	S	-	-	-	-	-	-	-	0.2	1	-0.22	0.4	0.44	0.096	-0.42	0.085	-2.6	7.5e-50	-2	3.5e-27
90	PF09532:FDF domain; PF12701:Scd6-like Sm domain	-	-	-	-	-	-	-	-	-	-	-	0.055	1	0.42	0.16	-0.19	0.77	0.36	0.23	0.93	8.8e-05	0.32	0.2
91	PF02752:Arrestin (or S-antigen), C-terminal domain	-	-	-	-	-	-	-	-	-	-	-	-0.089	1	-0.16	0.33	0.28	0.21	-0.068	0.71	0.77	8.3e-10	1.2	5.2e-22
92	PF00447:HSF-type DNA-binding	TF	-	-	S	-	-	-	-	GO:0003700,transcription factor activity; GO:0005634,nucleus; GO:0006355,regulation of transcription, DNA-dependent; GO:0043565,sequence-specific DNA binding	-	-	-0.083	1	-0.27	0.036	0.13	0.64	-0.18	0.16	0.99	2.7e-20	1.4	1.3e-38
93	PF06419:Conserved oligomeric complex COG6	-	-	-	-	-	-	-	-	-	-	-	0.11	1	0.55	0.039	0.28	0.56	0.44	0.1	0.77	0.0005	0.49	0.032
94	PF08695:Cytochrome oxidase complex assembly protein 1	-	-	-	S	-	-	-	-	-	-	-	-0.041	1	0.73	0.044	-0.021	0.99	0.77	0.031	1	0.00063	0.26	0.43
95	PF00676:Dehydrogenase E1 component	-	-	-	-	Valine, leucine and isoleucine biosynthesis; Butanoate metabolism; Pyruvate metabolism; Glycolysis / Gluconeogenesis	-	-	-	GO:0008152,metabolic process; GO:0016624,oxidoreductase activity, acting on the aldehyde or oxo group of donors, disulfide as acceptor; GO:0004739,pyruvate dehydrogenase (acetyl-transferring) activity	1.2.4.1	-	0.024	1	0.18	0.45	-0.47	0.058	0.15	0.52	-0.23	0.21	-0.88	2.7e-07
96	PF01910:Thiamine-binding protein; PF01910:Thiamine-binding protein	-	-	-	-	-	-	-	-	-	-	-	-0.17	1	-0.1	0.79	-0.24	0.7	0.073	0.86	0.65	0.0087	0.52	0.042
97	PF00514:Armadillo/beta-catenin-like repeat	-	-	-	-	-	-	-	-	GO:0005488,binding	-	-	0.1	1	0.053	0.8	0.12	0.73	-0.046	0.84	0.31	0.029	0.38	0.0073
98	PF00145:C-5 cytosine-specific DNA methylase	-	-	-	-	-	-	-	-	GO:0003677,DNA binding; GO:0006306,DNA methylation	-	-	0.17	0.94	0.39	0.017	0.26	0.29	0.22	0.2	0.41	0.0025	0.29	0.05
99	-	-	-	-	-	-	-	-	-	-	-	-	-0.029	1	0.12	0.81	0.31	0.78	0.15	0.77	1.5	2.4e-05	1.7	3.7e-06
100	PF17855:MCM AAA-lid domain; PF17207:MCM OB domain; PF14551:MCM N-terminal domain; PF00493:MCM P-loop domain	-	-	-	-	Purine metabolism	-	-	-	GO:0003677,DNA binding; GO:0005524,ATP binding; GO:0006270,DNA replication initiation; GO:0008094,DNA-dependent ATPase activity; GO:0000166,nucleotide binding; GO:0004812,aminoacyl-tRNA ligase activity; GO:0005737,cytoplasm; GO:0006412,translation; GO:0006418,tRNA aminoacylation for protein translation; GO:0017111,nucleoside-triphosphatase activity; GO:0005634,nucleus; GO:0004003,ATP-dependent DN…	3.6.1.3	-	0.037	1	0.87	0.024	0.14	0.9	0.83	0.031	0.92	0.0039	0.19	0.59
101	PF01483:Proprotein convertase P-domain; PF00082:Subtilase family	-	-	-	S	-	-	-	-	GO:0004289,subtilase activity; GO:0006508,proteolysis; GO:0004290,kexin activity	3.4.21.61	-	0.14	0.94	-0.29	0.031	0.19	0.36	-0.43	0.00069	0.59	7.4e-08	1.1	4.3e-23
102	PF02765:Telomeric single stranded DNA binding POT1/CDC13; PF16686:ssDNA-binding domain of telomere protection protein; PF16686:ssDNA-binding domain of telomere protection protein	-	-	-	-	-	-	-	-	-	-	-	0.066	1	0.34	0.2	0.56	0.068	0.28	0.31	0.035	0.89	0.26	0.26
103	PF04177:TAP42-like family	-	-	-	-	-	-	-	-	GO:0009607,response to biotic stimulus; GO:0009966,regulation of signal transduction	-	-	-0.2	1	0.044	0.89	0.21	0.63	0.24	0.33	0.18	0.38	0.35	0.082
104	PF00071:Ras family	-	-	-	-	-	9.A.50.1.1	-	-	GO:0005525,GTP binding; GO:0007264,small GTPase mediated signal transduction; GO:0003924,GTPase activity; GO:0005515,protein binding; GO:0006886,intracellular protein transport; GO:0006913,nucleocytoplasmic transport; GO:0007165,signal transduction; GO:0005622,intracellular; GO:0015031,protein transport; GO:0003925,small monomeric GTPase activity	3.6.5.2	-	-0.17	1	0.13	0.56	-0.0093	0.99	0.31	0.14	0.19	0.29	0.046	0.82
105	PF02219:Methylenetetrahydrofolate reductase	-	-	-	-	-	-	-	-	GO:0004489,methylenetetrahydrofolate reductase (NADPH) activity; GO:0006555,methionine metabolic process	1.5.1.20	-	-0.12	1	0.2	0.39	0.026	0.97	0.32	0.14	1.1	6.1e-11	0.97	3.8e-08
106	-	-	-	-	S	-	-	-	-	-	-	-	-0.15	1	-0.52	0.14	0.33	0.66	-0.37	0.31	0.11	0.76	0.95	0.0018
107	PF10513:Enhancer of polycomb-like	-	-	-	-	-	-	-	-	-	-	-	0.064	1	-0.22	0.29	0.19	0.58	-0.28	0.15	-0.1	0.55	0.3	0.067
108	-	-	-	-	-	-	-	-	-	-	-	-	0.074	1	-0.043	0.89	-0.0031	1	-0.12	0.69	0.85	2.3e-05	0.89	9.5e-06
109	PF00613:Phosphoinositide 3-kinase family, accessory domain (PIK domain); PF02779:Transketolase, pyrimidine binding domain; PF02780:Transketolase, C-terminal domain; PF00454:Phosphatidylinositol 3- and 4-kinase	-	-	-	S	Inositol phosphate metabolism	-	-	-	GO:0016773,phosphotransferase activity, alcohol group as acceptor; GO:0004428,inositol or phosphatidylinositol kinase activity; GO:0003824,catalytic activity; GO:0008152,metabolic process; GO:0005488,binding; GO:0004430,1-phosphatidylinositol 4-kinase activity	2.7.1.67	-	0.066	1	0.16	0.46	0.25	0.42	0.094	0.69	0.12	0.48	0.21	0.22
110	PF05183:RNA dependent RNA polymerase; PF04389:Peptidase family M28	-	-	-	S	-	-	-	-	GO:0006508,proteolysis; GO:0008233,peptidase activity	-	-	0.077	1	-0.095	0.55	0.28	0.11	-0.17	0.25	-0.19	0.12	0.19	0.12
111	-	-	-	-	-	-	-	-	-	-	-	-	-0.14	1	-0.45	0.27	-0.16	0.87	-0.3	0.48	-1.6	6.7e-08	-1.3	1e-05
112	PF04099:Sybindin-like family	-	-	-	-	-	-	-	-	GO:0005801,cis-Golgi network; GO:0006888,ER to Golgi vesicle-mediated transport; GO:0006810,transport	-	-	-0.28	0.99	-0.67	0.035	-0.31	0.58	-0.39	0.24	-0.93	0.00032	-0.57	0.032
113	PF02301:HORMA domain	-	-	-	-	-	-	-	-	GO:0007067,mitosis	-	-	-0.39	0.77	0.86	0.0036	0.57	0.078	1.3	4.7e-06	-0.95	1.3e-05	-1.2	6.5e-07
114	PF00400:WD domain, G-beta repeat; PF00400:WD domain, G-beta repeat; PF00400:WD domain, G-beta repeat; PF00400:WD domain, G-beta repeat; PF00400:WD domain, G-beta repeat; PF08324:PUL domain; PF09070:PFU (PLAA family ubiquitin binding)	-	-	-	-	-	-	-	-	-	-	-	0.12	1	0.29	0.46	0.89	0.023	0.17	0.69	-0.79	0.0055	-0.2	0.54
115	PF00300:Histidine phosphatase superfamily (branch 1)	-	-	-	-	Glycolysis / Gluconeogenesis	-	-	-	GO:0003824,catalytic activity; GO:0008152,metabolic process; GO:0004619,phosphoglycerate mutase activity; GO:0046537,2,3-bisphosphoglycerate-independent phosphoglycerate mutase activity; GO:0046538,2,3-bisphosphoglycerate-dependent phosphoglycerate mutase activity	5.4.2.1	-	-0.59	0.61	-0.93	0.0074	-0.19	0.82	-0.34	0.37	-0.85	0.0039	-0.11	0.75
116	PF09118:Domain of unknown function (DUF1929); PF07250:Glyoxal oxidase N-terminus	-	-	AA5_1	S	-	-	-	-	-	-	Fenton	-0.87	0.85	-1.2	0.069	0.51	-	-0.34	0.65	-1	0.063	0.68	0.24
117	-	-	-	-	-	-	-	-	-	GO:0003723,RNA binding	-	-	-0.28	1	0.51	0.19	-0.028	0.98	0.8	0.034	0.044	0.91	-0.5	0.13
118	-	-	-	-	-	-	-	-	-	-	-	-	0.067	1	-0.039	0.92	0.085	0.92	-0.11	0.77	0.064	0.81	0.19	0.46
119	PF03901:Alg9-like mannosyltransferase family	-	-	GT22	S	O-Glycans biosynthesis; Fructose and mannose metabolism; Peptidoglycan biosynthesis; Sphingoglycolipid metabolism; Blood group glycolipid biosynthesis - lact series; Blood group glycolipid biosynthesis - neolact series; Glycerolipid metabolism; Globoside metabolism; Chondroitin / heparan sulfate biosynthesis; Keratan sulfate biosynthesis; N-Glycans biosynthesis	-	-	-	GO:0000009,alpha-1,6-mannosyltransferase activity; GO:0000026,alpha-1,2-mannosyltransferase activity; GO:0000030,mannosyltransferase activity; GO:0000033,alpha-1,3-mannosyltransferase activity; GO:0001962,alpha-1,3-galactosyltransferase activity; GO:0003980,UDP-glucose:glycoprotein glucosyltransferase activity; GO:0004376,glycolipid mannosyltransferase activity; GO:0004576,oligosaccharyl transfer…	2.4.1.-	-	-0.12	1	-0.36	0.089	-0.29	0.38	-0.25	0.27	0.26	0.17	0.33	0.074
120	-	-	-	-	S	-	-	-	-	-	-	-	-0.61	0.94	0.14	0.85	-0.59	0.53	0.74	0.2	-2.1	3.3e-06	-2.8	3.4e-10
121	PF08213:Mitochondrial domain of unknown function (DUF1713)	-	-	-	-	-	-	-	-	-	-	-	-0.16	0.98	-0.0082	0.98	-0.1	0.81	0.16	0.44	-0.21	0.19	-0.31	0.052
122	-	-	-	-	-	-	-	-	-	GO:0004190,aspartic-type endopeptidase activity; GO:0006508,proteolysis	-	-	-0.081	1	-0.065	0.72	-0.096	0.76	0.017	0.94	-0.94	6.9e-16	-0.97	1.1e-16
123	PF01248:Ribosomal protein L7Ae/L30e/S12e/Gadd45 family	-	-	-	-	-	-	-	-	GO:0030529,ribonucleoprotein complex; GO:0042254,ribosome biogenesis and assembly	-	-	-0.32	1	0.61	0.18	-0.3	0.75	0.93	0.034	-0.33	0.39	-1.2	0.00062
124	PF00179:Ubiquitin-conjugating enzyme	-	-	-	-	-	3.A.20.1.1	-	-	GO:0019787,small conjugating protein ligase activity; GO:0043687,post-translational protein modification; GO:0051246,regulation of protein metabolic process; GO:0004842,ubiquitin-protein ligase activity; GO:0051438,regulation of ubiquitin-protein ligase activity; GO:0051440,regulation of ubiquitin-protein ligase activity during meiotic cell cycle; GO:0051443,positive regulation of ubiquitin-prote…	6.3.2.19	-	-0.17	1	-0.091	0.74	-0.1	0.87	0.078	0.79	-0.37	0.049	-0.38	0.045
125	PF13847:Methyltransferase domain	-	-	-	S	-	-	-	-	-	-	-	-0.27	0.98	0.069	0.86	0.32	0.5	0.33	0.28	-0.79	0.00075	-0.54	0.029
126	PF00227:Proteasome subunit	-	-	-	-	-	-	MER254846	-	GO:0004175,endopeptidase activity; GO:0005839,proteasome core complex; GO:0006511,ubiquitin-dependent protein catabolic process; GO:0004298,threonine endopeptidase activity; GO:0004299,proteasome endopeptidase activity	3.4.25.1	-	-0.058	1	0.38	0.21	-0.11	0.89	0.44	0.13	1.1	4.5e-06	0.59	0.016
127	PF02383:SacI homology domain; PF12456:Inositol phosphatase	-	-	-	S	Inositol phosphate metabolism	-	-	-	GO:0004445,inositol-polyphosphate 5-phosphatase activity	3.1.3.56	-	0.092	1	-0.28	0.21	0.24	0.51	-0.37	0.088	-0.036	0.87	0.49	0.0073
128	-	-	-	-	-	-	-	-	-	GO:0008270,zinc ion binding	-	-	0.014	1	-0.58	0.044	-0.014	0.99	-0.59	0.037	-0.61	0.01	-0.046	0.87
129	-	-	-	-	-	-	-	-	-	-	-	-	-	-	-	-	-	-	-	-	-	-	-	-
130	-	-	-	-	S	-	-	-	-	-	-	-	-	-	-	-	-	-	-	-	-	-	-	-
131	-	-	-	-	-	-	-	-	-	-	-	-	-	-	-	-	-	-	-	-	-	-	-	-
132	-	-	-	-	S	-	-	-	-	-	-	-	-	-	-	-	-	-	-	-	-	-	-	-
133	-	-	-	-	-	-	-	-	-	-	-	-	-	-	-	-	-	-	-	-	-	-	-	-
134	PF01425:Amidase	-	-	-	-	Tryptophan metabolism; Benzoate degradation via CoA ligation; Cyanoamino acid metabolism; Phenylalanine metabolism; Arginine and proline metabolism; Styrene degradation	-	-	-	GO:0016884,carbon-nitrogen ligase activity, with glutamine as amido-N-donor; GO:0004040,amidase activity	3.5.1.4	-	0.059	1	-0.53	0.25	-0.15	0.91	-0.59	0.2	-1.4	0.00012	-1	0.0067
135	PF06110:Eukaryotic protein of unknown function (DUF953)	-	-	-	-	-	-	-	-	-	-	-	-0.18	1	-0.33	0.25	-0.84	0.0026	-0.15	0.64	-1.3	6.3e-10	-1.8	5.2e-18
136	-	-	-	-	S	N-Glycan degradation; Sphingoglycolipid metabolism	-	-	-	GO:0004308,exo-alpha-sialidase activity	3.2.1.18	-	-0.66	0.2	0.2	0.56	0.092	0.91	0.86	0.0022	-4.3	5.9e-83	-4.4	1.1e-85
137	PF00153:Mitochondrial carrier protein; PF00153:Mitochondrial carrier protein; PF00153:Mitochondrial carrier protein; PF13499:EF-hand domain pair; PF13405:EF-hand domain; PF13833:EF-hand domain pair	-	-	-	-	-	2.A.29.14.1	-	-	GO:0005488,binding; GO:0006810,transport; GO:0016020,membrane; GO:0005509,calcium ion binding; GO:0005743,mitochondrial inner membrane	-	-	0.14	1	0.49	0.05	0.06	0.94	0.35	0.18	1.5	3.6e-13	1	4.2e-07
138	PF02475:Met-10+ like-protein	-	-	-	-	-	-	-	-	-	-	-	0.11	1	0.34	0.16	0.074	0.93	0.22	0.38	1.9	8.9e-22	1.7	2.7e-16
139	PF01026:TatD related DNase	-	-	-	S	-	-	-	-	GO:0016888,endodeoxyribonuclease activity, producing 5'-phosphomonoesters	-	-	0.16	1	-0.077	0.85	-0.21	0.78	-0.23	0.53	0.49	0.082	0.36	0.22
140	PF12352:Snare region anchored in the vesicle membrane C-terminus	-	-	-	-	-	-	-	-	GO:0006886,intracellular protein transport; GO:0016020,membrane	-	-	-0.33	0.99	-0.01	0.99	-0.34	0.62	0.32	0.45	-1.6	2.7e-07	-1.9	3.8e-10
141	-	-	-	-	-	-	-	-	-	-	-	-	-1.3	0.72	0.021	0.99	-0.11	0.97	1.3	0.13	-4.9	2.9e-12	-5	7.2e-13
142	-	-	-	-	-	-	-	-	-	-	-	-	0.14	1	-0.44	0.24	0.2	0.82	-0.57	0.11	-0.49	0.1	0.14	0.67
143	PF03171:2OG-Fe(II) oxygenase superfamily; PF14226:non-haem dioxygenase in morphine synthesis N-terminal	-	-	-	-	Glyoxylate and dicarboxylate metabolism	-	-	-	GO:0005506,iron ion binding; GO:0016491,oxidoreductase activity; GO:0050162,oxalate oxidase activity	1.2.3.4	-	-0.28	1	0.89	0.27	-0.23	0.93	1.2	0.14	-7.5	6.8e-33	-8.6	1e-39
144	PF11807:Domain of unknown function (DUF3328)	-	-	-	-	-	-	-	-	-	-	-	-0.36	1	0.89	0.24	-1	0.051	1.3	0.13	-5.7	1.3e-20	-7.6	2.1e-13
145	PF01687:Riboflavin kinase	-	-	-	-	Riboflavin metabolism	-	-	-	GO:0008531,riboflavin kinase activity; GO:0009231,riboflavin biosynthetic process	2.7.1.26	-	-0.052	1	-0.072	0.88	-0.57	0.49	-0.02	0.97	2.4	6.3e-11	1.9	1.8e-08
146	PF07938:Fungal fucose-specific lectin	-	-	-	-	-	-	-	-	-	-	-	0.23	1	-0.41	0.58	-1.2	0.13	-0.64	0.36	-3.1	4.4e-10	-3.9	8.3e-15
147	-	-	-	-	-	-	-	-	-	-	-	-	-0.5	-	0.15	-	0.52	-	0.65	0.74	-0.3	0.83	0.062	0.97
148	-	-	-	-	-	-	-	-	-	GO:0004748,ribonucleoside-diphosphate reductase activity; GO:0005971,ribonucleoside-diphosphate reductase complex; GO:0006260,DNA replication	-	-	0.5	-	0.33	-	-0.51	-	-0.17	0.93	0.6	0.64	-0.24	0.85
149	-	-	-	-	-	-	-	-	-	-	-	-	-0.3	-	-0.32	-	-1.2	-	-0.019	0.99	0.42	0.69	-0.45	0.74
150	PF00227:Proteasome subunit	-	-	-	-	-	-	MER254680	-	GO:0004298,threonine endopeptidase activity; GO:0005839,proteasome core complex; GO:0006511,ubiquitin-dependent protein catabolic process; GO:0004299,proteasome endopeptidase activity	3.4.25.1	-	-0.11	1	0.51	0.14	-0.35	0.54	0.62	0.063	0.73	0.0081	-0.13	0.68
151	-	-	-	-	S	-	-	-	-	-	-	-	-0.08	1	-0.15	0.76	0.42	0.56	-0.073	0.9	2.8	2e-17	3.4	8.1e-25
152	PF02373:JmjC domain, hydroxylase; PF02375:jmjN domain; PF13771:PHD-like zinc-binding domain	-	-	-	-	-	-	-	-	GO:0005351,sugar:hydrogen symporter activity; GO:0006810,transport; GO:0009401,phosphoenolpyruvate-dependent sugar phosphotransferase system	-	-	0.11	1	0.02	0.95	-0.016	0.98	-0.086	0.77	0.62	0.00085	0.58	0.0019
153	PF00498:FHA domain	-	-	-	-	-	-	-	-	-	-	-	-0.096	1	0.43	0.18	0.038	0.97	0.52	0.09	-0.027	0.93	-0.42	0.12
154	PF11735:Cryptococcal mannosyltransferase 1	-	-	-	S	-	-	-	-	-	-	-	0.1	1	-0.24	0.099	0.16	0.53	-0.34	0.015	0.13	0.29	0.52	6.8e-06
155	PF00185:Aspartate/ornithine carbamoyltransferase, Asp/Orn binding domain; PF02729:Aspartate/ornithine carbamoyltransferase, carbamoyl-P binding domain	-	-	-	-	Urea cycle and metabolism of amino groups; Arginine and proline metabolism	-	-	-	GO:0004585,ornithine carbamoyltransferase activity; GO:0006520,amino acid metabolic process; GO:0009348,ornithine carbamoyltransferase complex; GO:0016597,amino acid binding; GO:0016743,carboxyl- or carbamoyltransferase activity	2.1.3.3	-	-0.12	1	0.65	0.098	0.3	0.7	0.77	0.047	1.6	3.4e-07	1.3	8.5e-05
156	PF05693:Glycogen synthase	-	-	GT3	-	Starch and sucrose metabolism	-	-	-	GO:0004190,aspartic-type endopeptidase activity; GO:0006508,proteolysis; GO:0004373,glycogen (starch) synthase activity; GO:0005978,glycogen biosynthetic process	2.4.1.11	-	-0.0038	1	-0.22	0.37	0.24	0.52	-0.21	0.38	-0.95	6.8e-08	-0.5	0.0063
157	PF00248:Aldo/keto reductase family	-	-	-	-	-	-	-	-	GO:0016491,oxidoreductase activity	-	-	0.021	1	-0.5	0.13	-0.26	0.66	-0.52	0.11	-2.1	2.2e-16	-1.8	3.5e-13
158	PF00400:WD domain, G-beta repeat	-	-	-	-	Starch and sucrose metabolism	-	-	-	GO:0004339,glucan 1,4-alpha-glucosidase activity	3.2.1.3	-	0.14	1	0.35	0.15	0.21	0.65	0.21	0.42	0.4	0.042	0.26	0.22
159	-	-	-	-	-	-	-	-	-	-	-	-	-0.3	-	1.3	0.39	-0.57	-	1.6	0.27	2.4	0.033	0.54	0.65
160	PF06985:Heterokaryon incompatibility protein (HET)	-	-	-	-	-	-	-	-	-	-	-	0.5	-	0.69	-	-0.56	-	0.2	0.82	-1.8	0.0094	-3	0.00044
161	-	-	-	-	-	-	-	-	-	-	-	-	-	-	-	-	-	-	-	-	-	-	-	-
162	PF01843:DIL domain; PF01694:Rhomboid family	-	-	-	-	-	-	-	-	GO:0016021,integral to membrane	-	-	-0.13	1	0.14	0.48	-0.096	0.83	0.27	0.14	0.83	1.8e-08	0.59	7.8e-05
163	PF07890:Rrp15p	-	-	-	-	-	-	-	-	-	-	-	-0.068	1	0.8	0.087	-0.076	0.96	0.87	0.06	0.42	0.29	-0.45	0.27
164	PF10607:CTLH/CRA C-terminal to LisH motif domain; PF08513:LisH	-	-	-	-	-	-	-	-	-	-	-	-0.16	1	0.48	0.2	-0.23	0.77	0.64	0.077	0.16	0.63	-0.55	0.075
165	PF00069:Protein kinase domain	-	-	-	-	Sphingoglycolipid metabolism; Benzoate degradation via CoA ligation; Starch and sucrose metabolism; Inositol phosphate metabolism; Nicotinate and nicotinamide metabolism	-	-	-	GO:0004672,protein kinase activity; GO:0005524,ATP binding; GO:0006468,protein amino acid phosphorylation; GO:0004713,protein-tyrosine kinase activity; GO:0004674,protein serine/threonine kinase activity; GO:0008443,phosphofructokinase activity; GO:0008607,phosphorylase kinase regulator activity; GO:0008819,cobinamide kinase activity; GO:0016307,phosphatidylinositol phosphate kinase activity; GO:…	2.7.1.-	-	0.073	1	-0.27	0.29	0.38	0.25	-0.34	0.16	-0.87	6.4e-06	-0.22	0.29
166	PF05907:Eukaryotic protein of unknown function (DUF866)	-	-	-	S	-	-	-	-	-	-	-	-0.26	0.74	-0.48	0.0047	-0.36	0.082	-0.22	0.23	-0.88	2.8e-10	-0.76	4.2e-08
167	PF10213:Mitochondrial ribosomal subunit protein	-	-	-	-	-	-	-	-	-	-	-	-0.1	1	0.47	0.13	0.0027	1	0.57	0.06	0.26	0.34	-0.21	0.44
168	PF00735:Septin	-	-	-	-	-	-	-	-	GO:0005525,GTP binding; GO:0007049,cell cycle	-	-	-0.2	0.19	-0.29	0.00028	0.13	0.31	-0.094	0.3	-0.51	1e-13	-0.091	0.23
169	PF08389:Exportin 1-like protein	-	-	-	-	-	-	-	-	GO:0005488,binding	-	-	0.055	1	0.12	0.59	0.053	0.94	0.069	0.79	0.82	6.1e-07	0.75	6.1e-06
170	PF02629:CoA binding domain; PF13857:Ankyrin repeats (many copies); PF00549:CoA-ligase; PF00887:Acyl CoA binding protein	-	-	-	-	Citrate cycle (TCA cycle); Propanoate metabolism	-	-	-	GO:0000062,acyl-CoA binding; GO:0003824,catalytic activity; GO:0008152,metabolic process; GO:0005488,binding; GO:0003878,ATP citrate synthase activity; GO:0004775,succinate-CoA ligase (ADP-forming) activity; GO:0004776,succinate-CoA ligase (GDP-forming) activity; GO:0042709,succinate-CoA ligase complex; GO:0045244,succinate-CoA ligase complex (GDP-forming)	6.2.1.4	-	0.066	1	0.38	0.27	-0.078	0.94	0.32	0.37	0.67	0.013	0.21	0.47
171	PF00886:Ribosomal protein S16	-	-	-	-	-	-	-	-	GO:0003735,structural constituent of ribosome; GO:0005622,intracellular; GO:0005840,ribosome; GO:0006412,translation	-	-	-0.13	1	0.28	0.45	0.0068	0.99	0.41	0.23	0.46	0.1	0.19	0.54
172	PF16186:Atypical Arm repeat; PF01749:Importin beta binding domain; PF00514:Armadillo/beta-catenin-like repeat; PF00514:Armadillo/beta-catenin-like repeat; PF00514:Armadillo/beta-catenin-like repeat; PF00514:Armadillo/beta-catenin-like repeat; PF00514:Armadillo/beta-catenin-like repeat; PF00514:Armadillo/beta-catenin-like repeat; PF00514:Armadillo/beta-catenin-like repeat; PF00514:Armadillo/beta-c…	-	-	-	-	-	-	-	-	GO:0016071,mRNA metabolic process; GO:0030529,ribonucleoprotein complex; GO:0005634,nucleus; GO:0005643,nuclear pore; GO:0005737,cytoplasm; GO:0006606,protein import into nucleus; GO:0006886,intracellular protein transport; GO:0008565,protein transporter activity; GO:0005488,binding	-	-	0.013	1	-0.12	0.5	-0.08	0.84	-0.13	0.45	0.095	0.5	0.13	0.35
173	PF18004:26S proteasome regulatory subunit RPN2 C-terminal domain; PF01851:Proteasome/cyclosome repeat; PF13646:HEAT repeats	-	-	-	S	-	-	-	-	GO:0005488,binding; GO:0004298,threonine endopeptidase activity; GO:0004299,proteasome endopeptidase activity	3.4.25.1	-	0.19	0.83	0.23	0.1	0.11	0.7	0.045	0.81	0.76	2.6e-11	0.63	3.4e-08
174	PF02046:Cytochrome c oxidase subunit VIa	-	-	-	S	Oxidative phosphorylation	3.D.4.8.1	-	-	GO:0004129,cytochrome-c oxidase activity; GO:0005740,mitochondrial envelope; GO:0006118,electron transport; GO:0009481,aa3-type cytochrome c oxidase; GO:0009482,ba3-type cytochrome c oxidase; GO:0009483,caa3-type cytochrome c oxidase; GO:0009485,cbb3-type cytochrome c oxidase	1.9.3.1	-	-0.18	1	0.23	0.43	-0.61	0.047	0.41	0.12	0.58	0.0072	-0.25	0.28
175	-	-	-	-	S	-	-	-	-	-	-	-	-0.19	1	0.32	0.44	-0.019	0.99	0.51	0.18	-2.1	2.1e-12	-2.4	2.4e-16
176	PF00834:Ribulose-phosphate 3 epimerase family	-	-	-	S	Pentose phosphate pathway; Carbon fixation; Pentose and glucuronate interconversions	-	-	-	GO:0004750,ribulose-phosphate 3-epimerase activity; GO:0005975,carbohydrate metabolic process; GO:0003824,catalytic activity; GO:0008152,metabolic process	5.1.3.1	-	-0.22	1	0.15	0.69	-0.3	0.6	0.37	0.27	-1.1	7.3e-06	-1.6	3.3e-10
177	PF02887:Pyruvate kinase, alpha/beta domain; PF04488:Glycosyltransferase sugar-binding region containing DXD motif; PF00224:Pyruvate kinase, barrel domain	-	-	-	-	Purine metabolism; Glycolysis / Gluconeogenesis; Carbon fixation; Pyruvate metabolism	-	-	-	GO:0000287,magnesium ion binding; GO:0004743,pyruvate kinase activity; GO:0006096,glycolysis; GO:0030955,potassium ion binding; GO:0003824,catalytic activity	2.7.1.40	-	-0.13	1	-0.024	0.93	0.14	0.75	0.1	0.69	-0.22	0.23	-0.052	0.8
178	PF09270:Beta-trefoil DNA-binding domain; PF09271:LAG1, DNA binding	-	-	-	-	-	-	-	-	GO:0003700,transcription factor activity; GO:0005634,nucleus; GO:0045449,regulation of transcription; GO:0005515,protein binding; GO:0003677,DNA binding; GO:0006355,regulation of transcription, DNA-dependent	-	-	0.1	1	-0.11	0.68	0.11	0.85	-0.21	0.38	0.16	0.4	0.38	0.041
179	-	-	-	-	-	-	-	-	-	-	-	-	-0.68	0.88	0.08	0.91	-0.15	0.93	0.76	0.17	0.093	0.86	-0.14	0.8
180	PF13886:Domain of unknown function (DUF4203)	-	-	-	S	-	-	-	-	-	-	-	-0.067	1	-0.29	0.29	0.15	0.79	-0.22	0.43	-0.51	0.017	-0.068	0.78
181	PF00271:Helicase conserved C-terminal domain; PF00270:DEAD/DEAH box helicase	-	-	-	S	Purine metabolism	-	-	-	GO:0003676,nucleic acid binding; GO:0004386,helicase activity; GO:0005524,ATP binding; GO:0008026,ATP-dependent helicase activity; GO:0004003,ATP-dependent DNA helicase activity; GO:0004004,ATP-dependent RNA helicase activity; GO:0008094,DNA-dependent ATPase activity; GO:0008186,RNA-dependent ATPase activity; GO:0015462,protein-transmembrane transporting ATPase activity; GO:0016887,ATPase activit…	3.6.1.3	-	-0.03	1	0.32	0.3	0.13	0.87	0.35	0.25	1.4	2.2e-09	1.2	3.1e-07
182	PF00083:Sugar (and other) transporter	-	-	-	S	Pentose and glucuronate interconversions	2.A.1.1.73	-	-	GO:0005351,sugar:hydrogen symporter activity; GO:0008643,carbohydrate transport; GO:0016020,membrane; GO:0005215,transporter activity; GO:0006810,transport; GO:0016021,integral to membrane; GO:0008733,L-arabinose isomerase activity	5.3.1.4	-	-0.0058	1	0.073	0.65	0.31	0.057	0.079	0.63	-0.42	0.00021	-0.18	0.13
183	-	-	-	-	-	-	-	-	-	-	-	-	-0.14	1	0.12	0.67	-0.077	0.91	0.27	0.29	-0.8	2.4e-05	-1	2e-07
184	PF01535:PPR repeat; PF13041:PPR repeat family; PF13041:PPR repeat family; PF13812:Pentatricopeptide repeat domain	-	-	-	S	-	-	-	-	-	-	-	0.15	1	0.11	0.66	0.36	0.21	-0.047	0.87	0.89	1.1e-07	1.1	1.2e-11
185	PF00160:Cyclophilin type peptidyl-prolyl cis-trans isomerase/CLD	-	-	-	-	-	-	-	-	GO:0003755,peptidyl-prolyl cis-trans isomerase activity; GO:0006457,protein folding; GO:0000151,ubiquitin ligase complex; GO:0004842,ubiquitin-protein ligase activity; GO:0016567,protein ubiquitination; GO:0004600,cyclophilin; GO:0030051,FK506-sensitive peptidyl-prolyl cis-trans isomerase; GO:0042027,cyclophilin-type peptidyl-prolyl cis-trans isomerase activity	5.2.1.8	-	-0.1	1	-0.29	0.16	0.19	0.62	-0.19	0.38	-0.28	0.1	0.2	0.27
186	PF00501:AMP-binding enzyme	-	-	-	-	-	-	-	-	GO:0003824,catalytic activity; GO:0008152,metabolic process	-	-	2.3	0.0001	4.6	2.3e-22	0.62	0.52	2.3	6.6e-06	3.1	2.9e-12	-0.86	0.079
187	PF12770:CHAT domain	-	-	-	-	-	-	-	-	-	-	-	0.086	1	-0.26	0.41	-0.095	0.91	-0.35	0.25	-0.41	0.088	-0.25	0.33
188	-	-	-	-	-	-	-	-	-	-	-	-	0.21	-	-0.022	0.98	-0.36	-	-0.23	0.77	0.17	0.78	-0.17	0.78
189	PF00069:Protein kinase domain	-	-	-	S	-	-	-	-	GO:0004672,protein kinase activity; GO:0005524,ATP binding; GO:0006468,protein amino acid phosphorylation; GO:0004713,protein-tyrosine kinase activity; GO:0004674,protein serine/threonine kinase activity; GO:0004707,MAP kinase activity	2.7.11.24	-	-0.049	1	-0.22	0.2	0.35	0.073	-0.17	0.34	-0.73	3e-08	-0.16	0.28
190	PF00970:Oxidoreductase FAD-binding domain; PF00175:Oxidoreductase NAD-binding domain	-	-	-	S	-	3.D.5.1.1	-	-	GO:0006118,electron transport; GO:0016491,oxidoreductase activity; GO:0004128,cytochrome-b5 reductase activity	1.6.2.2	-	0.026	1	0.14	0.74	0.47	0.36	0.11	0.8	-0.23	0.44	0.094	0.78
191	PF00289:Biotin carboxylase, N-terminal domain; PF02786:Carbamoyl-phosphate synthase L chain, ATP binding domain; PF00364:Biotin-requiring enzyme; PF02785:Biotin carboxylase C-terminal domain	-	-	-	-	Valine, leucine and isoleucine degradation	-	-	-	GO:0006118,electron transport; GO:0010181,FMN binding; GO:0003824,catalytic activity; GO:0005524,ATP binding; GO:0008152,metabolic process; GO:0016874,ligase activity; GO:0009374,biotin binding; GO:0004485,methylcrotonoyl-CoA carboxylase activity	6.4.1.4	-	0.25	0.97	-0.51	0.05	-0.079	0.93	-0.76	0.0021	1.5	3.7e-12	1.9	8.9e-20
192	-	-	-	-	-	-	-	-	-	-	-	-	-0.95	0.6	-0.71	0.23	-0.13	0.95	0.24	0.74	-3.3	6.8e-13	-2.7	4.6e-09
193	PF00443:Ubiquitin carboxyl-terminal hydrolase; PF13446:A repeated domain in UCH-protein; PF13446:A repeated domain in UCH-protein	-	-	-	-	-	-	-	-	GO:0004221,ubiquitin thiolesterase activity; GO:0006511,ubiquitin-dependent protein catabolic process	3.1.2.15	-	0.19	0.98	-0.17	0.46	0.1	0.85	-0.35	0.082	0.49	0.0039	0.75	5.7e-06
194	-	-	-	-	-	-	-	-	-	-	-	-	0.034	1	0.096	0.82	0.25	0.7	0.062	0.89	-1.1	1.8e-05	-0.97	0.00024
195	-	-	-	-	-	-	-	-	-	-	-	-	-0.21	1	-0.5	0.13	-0.15	0.85	-0.29	0.41	-1	9.2e-05	-0.67	0.011
196	PF11696:Protein of unknown function (DUF3292)	-	-	-	-	-	-	-	-	-	-	-	-0.26	0.95	0.24	0.42	-0.06	0.95	0.5	0.058	0.54	0.016	0.25	0.32
197	PF08238:Sel1 repeat; PF08238:Sel1 repeat; PF08238:Sel1 repeat; PF08238:Sel1 repeat; PF08238:Sel1 repeat; PF08238:Sel1 repeat; PF08238:Sel1 repeat	-	-	-	S	-	-	-	-	GO:0009405,pathogenesis	-	-	-0.22	0.94	-0.46	0.027	0.0076	0.99	-0.23	0.28	0.35	0.052	0.81	1.8e-06
198	PF08240:Alcohol dehydrogenase GroES-like domain; PF00107:Zinc-binding dehydrogenase	-	-	-	-	Bile acid biosynthesis; Tyrosine metabolism; Glycerolipid metabolism; Glycolysis / Gluconeogenesis; Fatty acid metabolism	-	-	-	GO:0003824,catalytic activity; GO:0005488,binding; GO:0008152,metabolic process; GO:0004022,alcohol dehydrogenase activity; GO:0004023,alcohol dehydrogenase activity, metal ion-independent; GO:0004024,alcohol dehydrogenase activity, zinc-dependent; GO:0004025,alcohol dehydrogenase activity, iron-dependent	1.1.1.1	-	0.17	1	-1.4	2.2e-07	-0.34	0.48	-1.5	4.6e-09	-2.2	1.5e-21	-1.2	3.8e-07
199	PF02179:BAG domain; PF00240:Ubiquitin family	-	-	-	S	-	-	-	-	GO:0006464,protein modification process; GO:0005515,protein binding; GO:0006915,apoptosis	-	-	-0.2	0.99	0.12	0.67	-0.058	0.94	0.32	0.19	-0.53	0.0059	-0.7	0.00023
200	PF00069:Protein kinase domain	-	-	-	-	Sphingoglycolipid metabolism; Benzoate degradation via CoA ligation; Starch and sucrose metabolism; Inositol phosphate metabolism; Nicotinate and nicotinamide metabolism	-	-	-	GO:0004672,protein kinase activity; GO:0005524,ATP binding; GO:0006468,protein amino acid phosphorylation; GO:0004713,protein-tyrosine kinase activity; GO:0004674,protein serine/threonine kinase activity; GO:0008443,phosphofructokinase activity; GO:0008607,phosphorylase kinase regulator activity; GO:0008819,cobinamide kinase activity; GO:0016307,phosphatidylinositol phosphate kinase activity; GO:…	2.7.1.-	-	0.073	1	-0.00079	1	0.38	0.29	-0.074	0.83	-1.6	5.6e-16	-1.2	9.7e-10
201	PF04178:Got1/Sft2-like family	-	-	-	S	-	-	-	-	GO:0016192,vesicle-mediated transport	-	-	-0.098	1	-0.22	0.15	-0.33	0.054	-0.12	0.45	-0.19	0.14	-0.3	0.015
202	-	-	-	-	-	-	-	-	-	-	-	-	-0.21	0.88	-0.39	0.018	-0.19	0.58	-0.19	0.29	0.83	1.8e-08	1	3.6e-13
203	PF07690:Major Facilitator Superfamily	-	-	-	-	-	2.A.1.2.35	-	-	GO:0005215,transporter activity; GO:0006810,transport; GO:0016021,integral to membrane	-	-	-0.13	1	-0.17	0.43	-0.14	0.71	-0.037	0.89	-1.4	6.3e-22	-1.4	8.4e-21
204	PF08264:Anticodon-binding domain of tRNA; PF00133:tRNA synthetases class I (I, L, M and V)	-	-	-	-	Valine, leucine and isoleucine biosynthesis; Aminoacyl-tRNA biosynthesis	-	-	-	GO:0000166,nucleotide binding; GO:0004812,aminoacyl-tRNA ligase activity; GO:0005524,ATP binding; GO:0005737,cytoplasm; GO:0006412,translation; GO:0006418,tRNA aminoacylation for protein translation; GO:0004822,isoleucine-tRNA ligase activity; GO:0006428,isoleucyl-tRNA aminoacylation	6.1.1.5	-	-0.17	1	0.3	0.34	0.33	0.49	0.47	0.11	0.97	4.3e-05	1	2.4e-05
205	PF12171:Zinc-finger double-stranded RNA-binding	-	-	-	-	-	-	-	-	GO:0003676,nucleic acid binding; GO:0008270,zinc ion binding; GO:0005622,intracellular	-	-	-0.31	0.94	0.3	0.37	0.11	0.9	0.61	0.043	-0.17	0.54	-0.36	0.18
206	PF03946:Ribosomal protein L11, N-terminal domain; PF00298:Ribosomal protein L11, RNA binding domain	-	-	-	-	-	-	-	-	GO:0003735,structural constituent of ribosome; GO:0005622,intracellular; GO:0005840,ribosome; GO:0006412,translation	-	-	-0.17	1	0.87	0.12	-0.053	0.98	1	0.059	1.4	0.0016	0.51	0.3
207	PF08613:Cyclin	-	-	-	S	-	-	-	-	-	-	-	-0.021	1	0.56	0.027	0.2	0.7	0.58	0.021	0.28	0.19	-0.079	0.75
208	PF00069:Protein kinase domain	-	-	-	-	Sphingoglycolipid metabolism; Benzoate degradation via CoA ligation; Starch and sucrose metabolism; Inositol phosphate metabolism; Nicotinate and nicotinamide metabolism	-	-	-	GO:0004672,protein kinase activity; GO:0005524,ATP binding; GO:0006468,protein amino acid phosphorylation; GO:0003735,structural constituent of ribosome; GO:0005622,intracellular; GO:0005840,ribosome; GO:0006412,translation; GO:0004713,protein-tyrosine kinase activity; GO:0004674,protein serine/threonine kinase activity; GO:0008443,phosphofructokinase activity; GO:0008607,phosphorylase kinase reg…	2.7.1.-	-	0.11	1	-0.14	0.66	-0.16	0.78	-0.25	0.4	0.49	0.026	0.46	0.037
209	PF08640:U3 small nucleolar RNA-associated protein 6	-	-	-	-	-	-	-	-	GO:0005622,intracellular; GO:0006396,RNA processing	-	-	0.12	1	0.37	0.29	0.23	0.75	0.25	0.5	1.3	1.4e-06	1.2	2.1e-05
210	-	-	-	-	-	-	-	-	-	-	-	-	0.052	1	0.031	0.88	0.067	0.87	-0.021	0.92	-0.27	0.036	-0.23	0.077
211	PF00646:F-box domain	-	-	-	-	-	-	-	-	-	-	-	0.00034	1	-0.13	0.57	0.45	0.045	-0.13	0.57	-0.03	0.88	0.55	0.00058
212	PF00075:RNase H	-	-	-	-	-	-	-	-	GO:0003676,nucleic acid binding; GO:0004523,ribonuclease H activity	-	-	-0.65	-	0	-	-0.87	-	0.47	0.78	-0.52	0.67	-1.2	0.38
213	PF03901:Alg9-like mannosyltransferase family	-	-	GT22	S	N-Glycans biosynthesis	-	-	-	GO:0004584,dolichyl-phosphate-mannose-glycolipid alpha-mannosyltransferase activity	2.4.1.130	-	-0.04	1	-0.23	0.39	-0.03	0.97	-0.19	0.49	-0.2	0.34	-0.0038	0.99
214	PF00005:ABC transporter; PF01061:ABC-2 type transporter	-	-	-	S	-	3.A.1.204.9	-	-	GO:0005524,ATP binding; GO:0016887,ATPase activity; GO:0000166,nucleotide binding; GO:0017111,nucleoside-triphosphatase activity	-	-	-0.015	1	-0.27	0.37	0.12	0.87	-0.25	0.4	-0.26	0.28	0.13	0.61
215	PF04116:Fatty acid hydroxylase superfamily	-	-	-	S	-	-	-	-	GO:0003824,catalytic activity; GO:0008152,metabolic process; GO:0050046,lathosterol oxidase activity	1.14.21.6	-	0.11	1	0.36	0.013	0.0091	0.98	0.25	0.09	-0.59	6.6e-07	-0.94	1.2e-15
216	PF00226:DnaJ domain; PF01556:DnaJ C terminal domain	-	-	-	-	-	-	-	-	GO:0031072,heat shock protein binding; GO:0006457,protein folding; GO:0051082,unfolded protein binding	-	-	-0.19	1	0.44	0.059	0.27	0.5	0.63	0.005	1.1	2.6e-08	0.89	4.8e-06
217	PF00400:WD domain, G-beta repeat; PF00400:WD domain, G-beta repeat	-	-	-	-	-	9.A.14.1.1	-	-	-	-	-	-0.77	0.2	-1.4	7.9e-06	-0.072	0.95	-0.6	0.072	-2.4	3.9e-19	-1.1	6e-05
218	PF02146:Sir2 family; PF02146:Sir2 family	-	-	-	-	-	-	-	-	GO:0003677,DNA binding; GO:0005677,chromatin silencing complex; GO:0006342,chromatin silencing; GO:0006355,regulation of transcription, DNA-dependent; GO:0006476,protein amino acid deacetylation; GO:0008270,zinc ion binding; GO:0017136,NAD-dependent histone deacetylase activity; GO:0051287,NAD binding	-	-	0.079	1	-0.022	0.92	0.48	0.017	-0.1	0.63	-0.063	0.7	0.44	0.0033
219	PF00400:WD domain, G-beta repeat; PF12894:Anaphase-promoting complex subunit 4 WD40 domain	-	-	-	-	-	9.A.14.1.1	-	-	-	-	-	-0.029	1	0.093	0.68	-0.12	0.77	0.12	0.58	0.25	0.12	0.036	0.85
220	PF05160:DSS1/SEM1 family	-	-	-	-	-	-	-	-	-	-	-	-0.26	1	0.56	0.15	-0.39	0.56	0.83	0.026	0.53	0.096	-0.42	0.21
221	-	-	-	-	-	-	-	-	-	GO:0005488,binding	-	-	-0.085	1	0.6	0.11	-0.12	0.91	0.69	0.065	-0.5	0.09	-1.2	5.5e-05
222	-	-	-	-	-	-	-	-	-	-	-	-	-0.085	1	0.59	0.05	-0.031	0.97	0.67	0.022	-0.27	0.28	-0.89	0.00027
223	PF00083:Sugar (and other) transporter; PF00083:Sugar (and other) transporter	-	-	-	S	Pentose and glucuronate interconversions	2.A.1.9.4	-	-	GO:0005215,transporter activity; GO:0006810,transport; GO:0016021,integral to membrane; GO:0008733,L-arabinose isomerase activity	5.3.1.4	-	0.11	1	0.17	0.51	-0.15	0.76	0.063	0.84	0.73	0.00012	0.4	0.041
224	-	-	-	-	-	-	-	-	-	-	-	-	0.38	0.95	-0.33	0.42	-0.56	0.33	-0.71	0.056	3.8	3e-37	3.6	5.6e-34
225	PF00871:Acetokinase family	-	-	-	-	Propanoate metabolism; Pyruvate metabolism	-	-	-	GO:0005622,intracellular; GO:0008152,metabolic process; GO:0016301,kinase activity; GO:0016310,phosphorylation; GO:0016774,phosphotransferase activity, carboxyl group as acceptor; GO:0006082,organic acid metabolic process; GO:0008776,acetate kinase activity	2.7.2.1	-	-0.12	1	0.1	0.68	-0.051	0.95	0.22	0.32	0.89	6.2e-07	0.74	4.7e-05
226	PF09363:XFP C-terminal domain; PF03894:D-xylulose 5-phosphate/D-fructose 6-phosphate phosphoketolase; PF09364:XFP N-terminal domain	-	-	-	-	Lysine degradation; Sphingoglycolipid metabolism; Tyrosine metabolism; 1,4-Dichlorobenzene degradation; Fluorene degradation; Carbazole degradation; Pentose and glucuronate interconversions; Styrene degradation; Benzoate degradation via hydroxylation	-	-	-	GO:0016829,lyase activity; GO:0003824,catalytic activity; GO:0008152,metabolic process; GO:0008732,L-allo-threonine aldolase activity; GO:0018802,2,4-dihydroxyhept-2-ene-1,7-dioate aldolase activity; GO:0043801,hexulose-6-phosphate synthase activity; GO:0043863,4-hydroxy-2-ketopimelate aldolase activity; GO:0043876,D-threonine aldolase activity	4.1.2.-	-	-0.21	1	0.37	0.45	0.18	0.88	0.58	0.21	0.96	0.01	0.77	0.044
227	PF12697:Alpha/beta hydrolase family	-	-	-	-	-	-	MER209735	-	-	-	-	0.061	1	0.34	0.5	1	-	0.28	0.6	-0.83	0.014	-0.14	0.76
228	PF01699:Sodium/calcium exchanger protein; PF01699:Sodium/calcium exchanger protein	-	-	-	S	-	-	-	-	GO:0016021,integral to membrane	-	-	0.12	1	0.024	0.92	0.082	0.87	-0.1	0.64	-0.35	0.02	-0.29	0.059
229	PF00067:Cytochrome P450	-	CYP51	-	-	Tryptophan metabolism; Fatty acid metabolism; gamma-Hexachlorocyclohexane degradation	-	-	-	GO:0004497,monooxygenase activity; GO:0005506,iron ion binding; GO:0006118,electron transport; GO:0020037,heme binding; GO:0050381,unspecific monooxygenase activity	1.14.14.1	-	-1.6	0.6	-1.1	0.26	-0.23	0.94	0.45	0.7	0.12	0.89	1	0.21
230	PF00616:GTPase-activator protein for Ras-like GTPase	-	-	-	S	-	-	-	-	GO:0005096,GTPase activator activity; GO:0005622,intracellular; GO:0051056,regulation of small GTPase mediated signal transduction; GO:0007165,signal transduction	-	-	-0.33	0.96	0.35	0.38	-0.013	0.99	0.68	0.058	-1.9	1.2e-14	-2.3	6e-17
231	PF00616:GTPase-activator protein for Ras-like GTPase; PF03836:RasGAP C-terminus	-	-	-	-	-	-	-	-	GO:0005099,Ras GTPase activator activity; GO:0005622,intracellular; GO:0007264,small GTPase mediated signal transduction; GO:0005096,GTPase activator activity; GO:0051056,regulation of small GTPase mediated signal transduction; GO:0007165,signal transduction	-	-	0.087	1	-0.2	0.19	0.1	0.74	-0.29	0.049	-0.27	0.026	0.031	0.83
232	PF00646:F-box domain	-	-	-	-	-	-	-	-	-	-	-	-0.053	1	-0.2	0.4	0.055	0.94	-0.15	0.55	-0.51	0.004	-0.25	0.17
233	-	-	-	-	-	-	-	-	-	-	-	-	0.27	0.98	-0.67	0.025	-0.15	0.83	-0.94	0.00092	0.73	0.003	1.2	2.6e-07
234	PF01556:DnaJ C terminal domain; PF00684:DnaJ central domain	-	-	-	S	-	-	-	-	GO:0006457,protein folding; GO:0031072,heat shock protein binding; GO:0051082,unfolded protein binding	-	-	0.025	1	0.043	0.82	0.18	0.47	0.018	0.94	0.22	0.083	0.36	0.0043
235	PF08389:Exportin 1-like protein; PF00888:Cullin family; PF10557:Cullin protein neddylation domain	-	-	-	-	-	9.A.50.1.1	-	-	GO:0006511,ubiquitin-dependent protein catabolic process; GO:0031461,cullin-RING ubiquitin ligase complex; GO:0031625,ubiquitin protein ligase binding; GO:0005488,binding	-	-	0.036	1	0.069	0.76	0.13	0.73	0.033	0.9	0.32	0.041	0.38	0.014
236	-	-	-	-	S	-	-	-	-	-	-	-	-0.033	1	0.26	0.18	0.36	0.13	0.3	0.12	-0.54	0.00041	-0.44	0.0056
237	PF00026:Eukaryotic aspartyl protease	-	-	-	S	-	-	MER179430	-	GO:0004194,pepsin A activity; GO:0006508,proteolysis; GO:0004190,aspartic-type endopeptidase activity; GO:0004193,cathepsin E activity	3.4.23.34	-	-0.049	1	-0.4	0.17	0.12	0.87	-0.35	0.24	-0.92	8e-05	-0.39	0.11
238	-	-	-	-	-	-	-	-	-	-	-	-	-0.46	0.99	-0.78	0.15	0.058	0.97	-0.33	0.59	-2.7	6.1e-11	-1.8	7.3e-06
239	PF03097:BRO1-like domain	-	-	-	S	-	-	-	-	-	-	-	-0.12	1	-0.38	0.38	1.2	0.021	-0.26	0.56	0.57	0.098	2.1	1.9e-09
240	PF13949:ALIX V-shaped domain binding to HIV	-	-	-	-	-	-	-	-	GO:0005525,GTP binding; GO:0006614,SRP-dependent cotranslational protein targeting to membrane; GO:0008312,7S RNA binding; GO:0048500,signal recognition particle	-	-	-0.19	1	-0.21	0.44	0.34	0.34	-0.017	0.97	-0.91	2.8e-06	-0.37	0.076
241	PF11901:Protein of unknown function (DUF3421)	-	-	-	-	-	-	-	-	-	-	-	0.0033	1	-0.58	0.00025	-0.081	0.85	-0.58	0.00021	-0.54	9.5e-05	-0.04	0.81
242	PF08325:WLM domain	-	-	-	-	-	-	-	-	-	-	-	-0.11	1	0.43	0.2	0.03	0.98	0.54	0.092	0.72	0.0078	0.32	0.28
243	PF00365:Phosphofructokinase; PF00365:Phosphofructokinase	-	-	-	S	Pentose phosphate pathway; Fructose and mannose metabolism; Glycolysis / Gluconeogenesis; Galactose metabolism	-	-	-	GO:0003872,6-phosphofructokinase activity; GO:0005945,6-phosphofructokinase complex; GO:0006096,glycolysis; GO:0005737,cytoplasm	2.7.1.11	-	-0.12	1	0.48	0.31	0.26	0.79	0.6	0.19	0.57	0.13	0.36	0.37
244	-	-	-	-	-	-	-	-	-	-	-	-	-0.09	1	-0.43	0.043	-0.15	0.74	-0.34	0.11	0.55	0.0018	0.83	1.6e-06
245	PF16197:Ketoacyl-synthetase C-terminal extension; PF02801:Beta-ketoacyl synthase, C-terminal domain; PF00550:Phosphopantetheine attachment site; PF00550:Phosphopantetheine attachment site; PF00975:Thioesterase domain; PF14765:Polyketide synthase dehydratase; PF16073:Starter unit:ACP transacylase in aflatoxin biosynthesis; PF00698:Acyl transferase domain; PF00109:Beta-ketoacyl synthase, N-terminal…	-	-	-	-	-	-	-	PKS	GO:0009058,biosynthetic process; GO:0016788,hydrolase activity, acting on ester bonds; GO:0031177,phosphopantetheine binding; GO:0048037,cofactor binding; GO:0008152,metabolic process; GO:0003824,catalytic activity; GO:0005488,binding	-	-	-0.1	1	-0.25	0.48	0.54	0.2	-0.15	0.7	-0.12	0.68	0.67	0.011
246	PF09341:Transcription factor Pcc1	-	-	-	S	-	-	-	PKS	-	-	-	-0.08	1	-0.33	0.5	0.26	0.79	-0.25	0.63	-3.3	7.9e-23	-2.7	7.7e-16
247	PF00557:Metallopeptidase family M24	-	-	-	-	-	-	MER254829	PKS	GO:0006508,proteolysis; GO:0008235,metalloexopeptidase activity; GO:0004239,methionyl aminopeptidase activity	3.4.11.18	-	-0.029	1	-0.1	0.76	0.18	0.76	-0.072	0.84	0.47	0.034	0.75	0.0006
248	PF13649:Methyltransferase domain	-	-	-	-	-	-	-	PKS	GO:0008152,metabolic process; GO:0008168,methyltransferase activity	-	-	0.0027	1	0.12	0.49	0.088	0.82	0.12	0.5	0.07	0.63	0.034	0.83
249	PF05821:NADH-ubiquinone oxidoreductase ASHI subunit (CI-ASHI or NDUFB8)	-	-	-	-	-	3.D.1.6.1	-	PKS	-	-	-	-0.19	1	0.077	0.84	-0.35	0.46	0.27	0.41	-0.16	0.56	-0.58	0.018
250	PF00752:XPG N-terminal domain; PF00867:XPG I-region	-	-	-	-	Starch and sucrose metabolism	-	-	PKS	GO:0003697,single-stranded DNA binding; GO:0004519,endonuclease activity; GO:0005634,nucleus; GO:0006289,nucleotide-excision repair; GO:0004518,nuclease activity; GO:0006281,DNA repair; GO:0003677,DNA binding; GO:0003824,catalytic activity; GO:0004339,glucan 1,4-alpha-glucosidase activity	3.2.1.3	-	0.19	0.95	0.067	0.76	0.38	0.09	-0.12	0.56	0.2	0.19	0.51	0.00058
251	PF00107:Zinc-binding dehydrogenase; PF16884:N-terminal domain of oxidoreductase	-	-	-	-	-	-	-	PKS	GO:0003824,catalytic activity; GO:0005488,binding; GO:0008152,metabolic process; GO:0043738,F420H2 dehydrogenase activity; GO:0043826,sulfur oxygenase reductase activity; GO:0043883,malolactic enzyme activity; GO:0051341,regulation of oxidoreductase activity	1.-.-.-	-	0.22	0.76	0.54	0.00017	-0.041	0.93	0.31	0.04	0.13	0.31	-0.44	0.00045
252	PF00285:Citrate synthase, C-terminal domain	-	-	-	-	-	-	-	-	GO:0044262,cellular carbohydrate metabolic process; GO:0046912,transferase activity, transferring acyl groups, acyl groups converted into alkyl on transfer	-	-	0.33	0.81	1.3	4.4e-09	0.41	0.24	0.94	3.2e-05	1.3	7.3e-11	0.42	0.048
253	PF00285:Citrate synthase, C-terminal domain	-	-	-	-	-	-	-	-	GO:0044262,cellular carbohydrate metabolic process; GO:0046912,transferase activity, transferring acyl groups, acyl groups converted into alkyl on transfer	-	-	0.37	0.33	1.4	3.4e-19	0.18	0.58	1	6.1e-10	0.49	0.001	-0.71	2.2e-06
254	-	-	-	-	S	-	-	-	-	-	-	-	-0.16	1	-0.74	0.049	-0.25	0.75	-0.58	0.13	-1.1	0.00039	-0.59	0.06
255	PF17862:AAA+ lid domain; PF16450:Proteasomal ATPase OB C-terminal domain; PF00004:ATPase family associated with various cellular activities (AAA)	-	-	-	-	Purine metabolism	-	-	-	GO:0000166,nucleotide binding; GO:0017111,nucleoside-triphosphatase activity; GO:0005524,ATP binding; GO:0005634,nucleus; GO:0005737,cytoplasm; GO:0016787,hydrolase activity; GO:0030163,protein catabolic process; GO:0004003,ATP-dependent DNA helicase activity; GO:0004004,ATP-dependent RNA helicase activity; GO:0008026,ATP-dependent helicase activity; GO:0008094,DNA-dependent ATPase activity; GO:0…	3.6.1.3	-	0.00062	1	0.3	0.16	0.16	0.69	0.3	0.16	0.51	0.0024	0.38	0.029
256	PF04893:Yip1 domain	-	-	-	S	-	-	-	-	-	-	-	-0.17	0.98	0.23	0.26	0.041	0.95	0.4	0.037	-0.17	0.3	-0.36	0.028
257	-	-	-	-	-	-	-	-	-	-	-	-	-0.59	0.88	-0.62	0.21	-0.088	0.95	-0.025	0.97	-1.7	9.7e-06	-1.2	0.0029
258	-	-	-	-	-	-	-	-	-	-	-	-	-0.097	1	-0.21	0.33	0.035	0.96	-0.11	0.64	-0.53	0.00089	-0.29	0.085
259	PF08711:TFIIS helical bundle-like domain	-	-	-	-	-	-	-	-	-	-	-	-0.061	1	0.22	0.079	0.016	0.97	0.28	0.021	0.15	0.15	-0.052	0.67
260	-	-	-	-	-	-	-	-	-	-	-	-	0.11	1	0.13	0.6	0.15	0.75	0.025	0.94	-1.2	2.1e-11	-1.2	5.9e-11
261	-	-	-	-	-	-	-	-	-	-	-	-	0.091	1	-0.61	7.1e-05	-0.19	0.51	-0.7	2.9e-06	0.89	8.1e-11	1.3	1.7e-22
262	PF00172:Fungal Zn(2)-Cys(6) binuclear cluster domain; PF04082:Fungal specific transcription factor domain	TF	-	-	-	-	-	-	-	GO:0003700,transcription factor activity; GO:0005634,nucleus; GO:0006355,regulation of transcription, DNA-dependent; GO:0008270,zinc ion binding; GO:0003677,DNA binding; GO:0006350,transcription	-	-	0.069	1	-0.045	0.88	0.44	0.13	-0.11	0.68	0.42	0.025	0.9	8.6e-07
263	PF00664:ABC transporter transmembrane region; PF00005:ABC transporter	-	-	-	-	-	3.A.1.210.1	-	-	GO:0005524,ATP binding; GO:0006810,transport; GO:0016021,integral to membrane; GO:0042626,ATPase activity, coupled to transmembrane movement of substances; GO:0016887,ATPase activity; GO:0000166,nucleotide binding; GO:0017111,nucleoside-triphosphatase activity	-	-	0.019	1	-0.044	0.79	0.12	0.63	-0.063	0.7	0.17	0.15	0.33	0.0031
264	-	-	-	-	S	-	-	-	-	-	-	-	-0.87	0.75	-0.64	0.35	0.26	-	0.23	0.75	-2.7	3.1e-09	-1.8	8.5e-05
265	PF08240:Alcohol dehydrogenase GroES-like domain; PF00107:Zinc-binding dehydrogenase	-	-	-	-	Bile acid biosynthesis; Tyrosine metabolism; Glycerolipid metabolism; Glycolysis / Gluconeogenesis; Fatty acid metabolism	-	-	-	GO:0003824,catalytic activity; GO:0005488,binding; GO:0008152,metabolic process; GO:0004022,alcohol dehydrogenase activity; GO:0004023,alcohol dehydrogenase activity, metal ion-independent; GO:0004024,alcohol dehydrogenase activity, zinc-dependent; GO:0004025,alcohol dehydrogenase activity, iron-dependent	1.1.1.1	-	-0.049	1	-0.64	0.043	-0.25	0.66	-0.59	0.061	-0.73	0.0054	-0.34	0.21
266	PF00248:Aldo/keto reductase family	-	-	-	-	Vitamin B6 metabolism	8.A.5.1.1	-	-	GO:0016491,oxidoreductase activity; GO:0050236,pyridoxine 4-dehydrogenase activity	1.1.1.65	-	-0.3	0.9	0.055	0.87	-0.22	0.63	0.36	0.18	-2.4	1.8e-33	-2.7	9.7e-41
267	-	-	-	-	S	-	-	-	-	-	-	-	0.046	1	-0.84	0.00039	0.079	0.92	-0.89	0.00016	-1	5.4e-07	-0.1	0.67
268	PF00248:Aldo/keto reductase family	-	-	-	-	Vitamin B6 metabolism	8.A.5.1.1	-	-	GO:0016491,oxidoreductase activity; GO:0004553,hydrolase activity, hydrolyzing O-glycosyl compounds; GO:0005975,carbohydrate metabolic process; GO:0050236,pyridoxine 4-dehydrogenase activity	1.1.1.65	-	-0.28	1	2.7	0.00013	0.05	0.98	3	1.7e-05	0.77	0.25	-1.9	0.0026
269	PF13516:Leucine Rich repeat; PF13516:Leucine Rich repeat; PF13516:Leucine Rich repeat; PF13855:Leucine rich repeat	-	-	-	-	-	-	-	-	GO:0005515,protein binding	-	-	0.0045	1	0.81	0.029	0.081	0.95	0.81	0.029	0.98	0.0014	0.25	0.47
270	PF03501:Plectin/S10 domain	-	-	-	-	-	-	-	-	-	-	-	0.0019	1	0.94	0.11	-0.16	0.93	0.94	0.11	1.9	3.9e-05	0.82	0.094
271	-	-	-	-	S	-	-	-	-	-	-	-	-0.79	-	-0.33	0.7	0.61	-	0.46	0.53	-1.6	0.0023	-0.65	0.26
272	-	-	-	-	S	-	-	-	-	-	-	-	-0.25	0.98	-0.7	0.0074	-0.065	0.94	-0.45	0.092	-0.71	0.0013	-0.074	0.77
273	-	-	-	-	-	-	-	-	-	-	-	-	-0.78	0.9	-0.2	0.85	0.37	-	0.58	0.43	-3	3.4e-09	-2.4	6.9e-06
274	PF00067:Cytochrome P450	-	CYP51	-	-	-	-	-	-	GO:0004497,monooxygenase activity; GO:0005506,iron ion binding; GO:0006118,electron transport; GO:0020037,heme binding	-	-	-0.43	-	-0.068	-	-0.77	-	0.37	0.73	-2.7	0.0038	-3.4	0.0011
275	PF13472:GDSL-like Lipase/Acylhydrolase family	-	-	-	S	-	-	-	-	GO:0006629,lipid metabolic process; GO:0016788,hydrolase activity, acting on ester bonds	-	-	-0.3	1	-0.78	0.14	-0.62	0.43	-0.47	0.4	-7.1	7.1e-71	-6.9	3.8e-68
276	-	-	-	-	-	-	-	-	-	GO:0004402,histone acetyltransferase activity	2.3.1.48	-	-0.093	1	-0.29	0.21	0.2	0.66	-0.2	0.41	-0.1	0.62	0.39	0.047
277	-	-	-	-	S	-	-	-	-	-	-	-	0.17	1	1	0.091	-0.042	0.98	0.86	0.16	1.1	0.031	0.014	0.98
278	PF10332:Protein of unknown function (DUF2418)	-	-	-	-	-	-	-	-	-	-	-	0.049	1	0.47	0.045	0.1	0.87	0.42	0.072	-0.17	0.41	-0.53	0.0059
279	PF00096:Zinc finger, C2H2 type; PF00096:Zinc finger, C2H2 type; PF00096:Zinc finger, C2H2 type	TF	-	-	-	-	-	-	-	GO:0003676,nucleic acid binding; GO:0005622,intracellular; GO:0008270,zinc ion binding	-	-	0.13	1	-0.34	0.2	0.13	0.85	-0.47	0.068	0.26	0.25	0.73	0.0007
280	PF04479:RTA1 like protein	-	-	-	-	-	9.A.26.1.2	-	-	GO:0006950,response to stress; GO:0016021,integral to membrane	-	-	-0.93	0.88	-0.37	0.68	-0.18	0.94	0.56	0.51	-0.17	0.81	0.016	0.99
281	-	-	-	-	S	-	-	-	-	-	-	-	-0.049	1	-0.077	0.93	-0.89	0.42	-0.028	0.98	2.4	2.2e-05	1.6	0.0057
282	-	-	-	-	S	-	-	-	-	-	-	-	-0.41	1	-0.52	0.44	0.013	0.99	-0.11	0.9	-1.8	0.00017	-1.3	0.0096
283	PF00067:Cytochrome P450	-	CYP62	-	S	Tryptophan metabolism; Fatty acid metabolism; gamma-Hexachlorocyclohexane degradation	-	-	-	GO:0004497,monooxygenase activity; GO:0005506,iron ion binding; GO:0006118,electron transport; GO:0020037,heme binding; GO:0050381,unspecific monooxygenase activity	1.14.14.1	-	-0.16	1	-1.6	0.0018	1.5	0.0089	-1.4	0.0059	-3.5	4.6e-17	-0.46	0.33
284	PF13561:Enoyl-(Acyl carrier protein) reductase	-	-	-	S	Prostaglandin and leukotriene metabolism	-	-	-	GO:0008152,metabolic process; GO:0016491,oxidoreductase activity; GO:0003824,catalytic activity; GO:0005488,binding; GO:0004090,carbonyl reductase (NADPH) activity	1.1.1.184	-	-0.22	1	-0.43	0.42	0.28	0.8	-0.22	0.72	-3.6	8.4e-21	-2.9	1.1e-13
285	PF07989:Centrosomin N-terminal motif 1	-	-	-	-	-	-	-	-	GO:0005515,protein binding; GO:0016020,membrane; GO:0016192,vesicle-mediated transport	-	-	0.33	0.66	-0.14	0.53	0.37	0.18	-0.47	0.02	0.038	0.85	0.55	0.0012
286	PF01940:Integral membrane protein DUF92	-	-	-	S	-	-	-	-	-	-	-	0.058	1	-0.91	0.0005	-0.11	0.89	-0.97	0.00018	-0.8	0.00042	0.003	0.99
287	-	-	-	-	-	-	-	-	-	-	-	-	0.06	1	-0.67	0.0023	0.26	0.49	-0.73	0.00071	0.22	0.27	1.1	3.9e-10
288	PF00168:C2 domain	-	-	-	-	-	-	-	-	-	-	-	-0.35	1	-0.24	0.71	-0.57	0.53	0.11	0.88	-1.7	0.00013	-2	4.1e-06
289	-	-	-	-	S	-	-	-	-	-	-	-	1.1	0.00027	0.61	0.029	0.017	0.99	-0.48	0.091	3.3	5.1e-49	2.7	3e-33
290	PF00646:F-box domain	-	-	-	S	-	-	-	-	-	-	-	0.00011	1	-0.29	0.7	-0.13	0.95	-0.29	0.71	2.2	6.5e-05	2.4	1.3e-05
291	PF08645:Polynucleotide kinase 3 phosphatase; PF13671:AAA domain	-	-	-	-	-	-	-	-	-	-	-	0.13	1	0.81	0.018	-0.3	0.65	0.69	0.049	0.4	0.18	-0.71	0.015
292	PF08238:Sel1 repeat; PF08238:Sel1 repeat; PF08238:Sel1 repeat; PF08238:Sel1 repeat; PF08238:Sel1 repeat; PF08238:Sel1 repeat; PF08238:Sel1 repeat; PF06201:PITH domain	-	-	-	-	-	-	-	-	GO:0004197,cysteine-type endopeptidase activity; GO:0006508,proteolysis	-	-	-0.039	1	-0.36	0.0022	-0.19	0.28	-0.33	0.007	-0.051	0.66	0.12	0.27
293	-	-	-	-	-	-	-	-	-	-	-	-	-0.057	1	-0.46	0.073	0.52	0.48	-0.4	0.12	2.3	2e-15	3.2	1e-26
294	PF17811:Jumonji helical domain; PF02373:JmjC domain, hydroxylase	-	-	-	-	-	-	-	-	GO:0008270,zinc ion binding	-	-	0.24	0.92	0.03	0.92	0.27	0.42	-0.21	0.36	-0.086	0.66	0.16	0.42
295	PF00162:Phosphoglycerate kinase	-	-	-	-	Carbon fixation; Glycolysis / Gluconeogenesis	-	-	-	GO:0004618,phosphoglycerate kinase activity; GO:0006096,glycolysis	2.7.2.3	-	-0.069	1	0.26	0.4	-0.19	0.76	0.33	0.27	-0.043	0.88	-0.49	0.041
296	-	-	-	-	-	-	-	-	-	GO:0003755,peptidyl-prolyl cis-trans isomerase activity; GO:0004600,cyclophilin; GO:0030051,FK506-sensitive peptidyl-prolyl cis-trans isomerase; GO:0042027,cyclophilin-type peptidyl-prolyl cis-trans isomerase activity	5.2.1.8	-	-0.18	1	0.25	0.3	0.14	0.77	0.43	0.052	0.32	0.089	0.22	0.27
297	PF07690:Major Facilitator Superfamily	-	-	-	-	-	-	-	-	GO:0005215,transporter activity; GO:0006810,transport; GO:0016021,integral to membrane	-	-	0.14	1	0.78	0.051	-0.12	0.93	0.64	0.11	1.7	1.6e-07	0.8	0.018
298	PF13561:Enoyl-(Acyl carrier protein) reductase	-	-	-	-	Fatty acid biosynthesis (path 1)	-	-	-	GO:0008152,metabolic process; GO:0016491,oxidoreductase activity; GO:0003824,catalytic activity; GO:0005488,binding; GO:0004316,3-oxoacyl-[acyl-carrier-protein] reductase activity	1.1.1.100	-	-0.13	1	0.054	0.87	-0.13	0.82	0.18	0.5	0.2	0.35	0.015	0.96
299	PF00591:Glycosyl transferase family, a/b domain; PF02885:Glycosyl transferase family, helical bundle domain	-	-	-	-	Phenylalanine, tyrosine and tryptophan biosynthesis	-	-	-	GO:0008152,metabolic process; GO:0016757,transferase activity, transferring glycosyl groups; GO:0000162,tryptophan biosynthetic process; GO:0004048,anthranilate phosphoribosyltransferase activity	2.4.2.18	-	-0.53	0.84	-0.21	0.66	-0.71	0.21	0.32	0.47	1.3	0.00011	0.81	0.018
300	-	-	-	-	-	-	-	-	-	-	-	-	-0.77	0.96	0.45	0.62	0.32	0.88	1.2	0.12	-0.4	0.58	-0.53	0.46
301	-	-	-	-	S	-	-	-	-	-	-	-	0.11	1	0.36	0.57	0.15	0.94	0.25	0.71	3.3	1.2e-12	3.1	3e-11
302	PF01179:Copper amine oxidase, enzyme domain; PF02727:Copper amine oxidase, N2 domain; PF02728:Copper amine oxidase, N3 domain	-	-	-	-	Phenylalanine metabolism; Arginine and proline metabolism; Alkaloid biosynthesis II; Glycine, serine and threonine metabolism; beta-Alanine metabolism; Histidine metabolism; Tryptophan metabolism; Tyrosine metabolism	-	-	-	GO:0005507,copper ion binding; GO:0008131,amine oxidase activity; GO:0009308,amine metabolic process; GO:0048038,quinone binding	1.4.3.6	-	0.33	0.9	-0.93	0.0003	-0.35	0.43	-1.3	3.2e-07	1.7	5.4e-15	2.3	3.6e-26
303	-	-	-	-	-	-	-	-	-	-	-	-	-	-	-	-	-	-	-	-	-	-	-	-
304	PF11807:Domain of unknown function (DUF3328)	-	-	-	S	-	-	-	-	-	-	-	0.45	-	0.2	-	0.33	-	0	1	-1.6	0.21	-1.5	0.23
305	-	-	-	-	-	-	-	-	-	-	-	-	-	-	-	-	-	-	-	-	-	-	-	-
306	PF01015:Ribosomal S3Ae family	-	-	-	-	-	-	-	-	GO:0003735,structural constituent of ribosome; GO:0005622,intracellular; GO:0005840,ribosome; GO:0006412,translation	-	-	-0.12	1	1.1	0.099	0.022	0.99	1.2	0.062	1.6	0.0023	0.54	0.33
307	PF03987:Autophagocytosis associated protein, active-site domain	-	-	-	-	-	-	-	-	-	-	-	0.06	1	0.45	0.15	-0.16	0.83	0.39	0.22	-0.38	0.14	-0.99	7.4e-05
308	PF00108:Thiolase, N-terminal domain; PF02803:Thiolase, C-terminal domain	-	-	-	S	Fatty acid biosynthesis (path 2); Tryptophan metabolism; Benzoate degradation via CoA ligation; Propanoate metabolism; Fatty acid metabolism; Synthesis and degradation of ketone bodies; Butanoate metabolism; Pyruvate metabolism; Lysine degradation	-	-	-	GO:0003824,catalytic activity; GO:0008152,metabolic process; GO:0003985,acetyl-CoA C-acetyltransferase activity	2.3.1.9	-	0.31	0.81	0.51	0.019	0.053	0.94	0.2	0.4	-0.26	0.18	-0.71	7.1e-05
309	PF07690:Major Facilitator Superfamily	-	-	-	-	-	2.A.1.14.4	-	-	-	-	-	0.23	1	-1	0.0092	-0.063	0.96	-1.2	0.00099	-1.4	6.6e-06	-0.49	0.14
310	-	-	-	-	-	-	-	-	-	GO:0005515,protein binding	-	-	0.14	1	0.19	0.42	0.18	0.68	0.041	0.89	0.88	2.6e-07	0.87	4.9e-07
311	PF07690:Major Facilitator Superfamily	-	-	-	-	-	2.A.1.14.11	-	-	GO:0005215,transporter activity; GO:0006810,transport; GO:0016021,integral to membrane	-	-	0.6	0.78	-0.32	0.48	0.18	0.88	-0.93	0.024	2.6	3.4e-14	3.1	9.7e-20
312	-	-	-	-	S	-	2.A.1.14.11	-	-	-	-	-	0.5	0.81	-0.4	0.29	-0.38	0.56	-0.89	0.0097	1.8	7.4e-10	1.8	2.7e-10
313	-	-	-	-	-	-	-	-	-	-	-	-	-0.35	0.74	-0.015	0.96	0.019	0.98	0.33	0.17	-0.065	0.78	-0.031	0.9
314	PF03171:2OG-Fe(II) oxygenase superfamily; PF14226:non-haem dioxygenase in morphine synthesis N-terminal	-	-	-	-	-	-	-	-	GO:0005506,iron ion binding; GO:0016491,oxidoreductase activity	-	-	-0.18	0.9	0.12	0.48	-0.28	0.2	0.31	0.052	0.32	0.016	-0.08	0.59
315	-	-	-	-	S	-	-	-	-	-	-	-	-0.39	0.48	-0.55	0.0085	-0.14	0.77	-0.16	0.51	1.2	6.5e-12	1.6	8.9e-21
316	PF02806:Alpha amylase, C-terminal all-beta domain; PF00128:Alpha amylase, catalytic domain; PF02922:Carbohydrate-binding module 48 (Isoamylase N-terminal domain)	-	-	CBM48; GH13_8	-	Starch and sucrose metabolism	-	-	-	GO:0004553,hydrolase activity, hydrolyzing O-glycosyl compounds; GO:0005975,carbohydrate metabolic process; GO:0003824,catalytic activity; GO:0043169,cation binding; GO:0003844,1,4-alpha-glucan branching enzyme activity	2.4.1.18	-	-0.27	1	-0.71	0.23	0.8	0.34	-0.44	0.48	-1.5	0.0011	0.0095	0.99
317	PF04389:Peptidase family M28; PF04253:Transferrin receptor-like dimerisation domain; PF02225:PA domain	-	-	-	S	-	-	-	-	GO:0043275,glutamate carboxypeptidase II activity	3.4.17.21	-	-0.25	1	-0.8	0.011	-0.0052	1	-0.56	0.084	-0.67	0.012	0.13	0.68
318	PF01522:Polysaccharide deacetylase	-	-	CE4	S	-	-	-	-	GO:0005975,carbohydrate metabolic process; GO:0016810,hydrolase activity, acting on carbon-nitrogen (but not peptide) bonds; GO:0003824,catalytic activity	-	-	0.4	-	0.66	0.34	0.76	-	0.26	0.75	-0.31	0.58	-0.21	0.75
319	-	-	-	-	-	-	-	-	-	-	-	-	-	-	-	-	-	-	-	-	-	-	-	-
320	-	-	-	-	S	-	-	-	-	-	-	-	-	-	-	-	-	-	-	-	-	-	-	-
321	-	-	-	-	-	-	-	-	-	-	-	-	-	-	-	-	-	-	-	-	-	-	-	-
322	PF00067:Cytochrome P450	-	CYP60	-	S	-	-	-	-	GO:0004497,monooxygenase activity; GO:0005506,iron ion binding; GO:0006118,electron transport; GO:0020037,heme binding	-	-	-1.2	0.69	-1.7	0.03	-0.19	0.94	-0.49	0.6	2.4	0.00017	4	4.8e-10
323	-	-	-	-	S	-	-	-	-	-	-	-	-0.48	1	0.073	0.93	-0.11	0.96	0.55	0.41	0.26	0.65	0.074	0.9
324	PF11807:Domain of unknown function (DUF3328)	-	-	-	-	-	-	-	-	-	-	-	-0.15	-	0.57	0.58	-0.23	-	0.72	0.48	0.15	0.87	-0.65	0.43
325	PF00169:PH domain	-	-	-	-	-	-	-	-	-	-	-	0.45	0.85	0.83	0.015	0.047	0.97	0.38	0.3	0.71	0.014	-0.077	0.82
326	PF02450:Lecithin:cholesterol acyltransferase	-	-	-	S	-	-	-	-	GO:0004607,phosphatidylcholine-sterol O-acyltransferase activity; GO:0006629,lipid metabolic process; GO:0046027,phospholipid:diacylglycerol acyltransferase activity	2.3.1.158	-	-0.031	1	0.33	0.22	0.3	0.48	0.36	0.18	-0.28	0.22	-0.31	0.18
327	PF04820:Tryptophan halogenase; PF04820:Tryptophan halogenase	-	-	-	S	-	-	-	-	-	-	-	0.14	1	0.36	0.29	-0.055	0.96	0.22	0.56	0.27	0.34	-0.15	0.63
328	-	-	-	-	-	-	-	-	-	-	-	-	0.19	1	0.037	0.96	-0.28	0.84	-0.16	0.86	-2.3	7.1e-07	-2.7	3.8e-08
329	-	-	-	-	-	-	-	-	-	GO:0006457,protein folding; GO:0015031,protein transport	-	-	0.022	1	-0.51	0.36	-0.043	0.98	-0.54	0.33	-1.6	0.00019	-1.1	0.011
330	-	-	-	-	-	-	-	-	-	-	-	-	0.13	1	0.49	0.18	0.11	0.92	0.36	0.34	-2.8	9.8e-24	-3.2	3e-30
331	-	-	-	-	-	-	-	-	-	GO:0008061,chitin binding	-	-	-0.65	-	0.64	-	0.32	-	1.3	0.26	-0.67	0.45	-0.98	0.32
332	PF01513:ATP-NAD kinase	-	-	-	-	Nicotinate and nicotinamide metabolism	-	-	-	GO:0003951,NAD+ kinase activity; GO:0008152,metabolic process	2.7.1.23	-	0.21	0.98	0.45	0.05	0.15	0.78	0.24	0.33	1.1	1e-09	0.85	1e-05
333	-	-	-	-	S	-	-	-	-	-	-	-	-0.44	0.96	0.39	0.43	-0.21	0.85	0.83	0.065	-2.1	2.4e-09	-2.7	4.4e-14
334	PF07690:Major Facilitator Superfamily; PF07690:Major Facilitator Superfamily	-	-	-	-	-	-	-	-	GO:0005215,transporter activity; GO:0006810,transport; GO:0016021,integral to membrane	-	-	-0.28	1	0.077	0.91	0.17	0.9	0.36	0.54	-2.8	1.7e-12	-2.7	4.8e-11
335	-	-	-	-	S	-	-	-	-	-	-	-	0.089	1	0.12	0.52	-0.046	0.93	0.027	0.9	0.72	4.5e-08	0.56	3e-05
336	-	-	-	-	-	-	-	-	-	-	-	-	-0.2	1	-0.16	0.71	-0.2	0.78	0.046	0.93	-1.3	2e-06	-1.3	1e-06
337	PF07690:Major Facilitator Superfamily	-	-	-	-	-	2.A.1.2.28	-	-	GO:0015520,tetracycline:hydrogen antiporter activity; GO:0015904,tetracycline transport; GO:0016021,integral to membrane; GO:0046677,response to antibiotic; GO:0005215,transporter activity; GO:0006810,transport	-	-	-0.037	1	-0.15	0.54	-0.24	0.48	-0.11	0.66	0.39	0.026	0.29	0.1
338	-	-	-	-	S	-	-	-	-	-	-	-	-0.84	0.77	-2.2	2.1e-05	-0.17	0.93	-1.4	0.014	-4.1	1.2e-19	-2.1	9e-06
339	-	-	-	-	-	-	-	-	-	-	-	-	-	-	-	-	-	-	-	-	-	-	-	-
340	PF08242:Methyltransferase domain	-	-	-	S	-	-	-	-	-	-	-	-0.037	1	-0.38	0.063	-0.32	0.29	-0.35	0.092	0.44	0.012	0.5	0.0035
341	PF00501:AMP-binding enzyme	-	-	-	-	Flavonoids, stilbene and lignin biosynthesis	4.C.1.1.7	-	-	GO:0003824,catalytic activity; GO:0008152,metabolic process; GO:0016207,4-coumarate-CoA ligase activity	6.2.1.12	-	0.3	1	-0.46	0.38	-0.53	0.52	-0.76	0.12	0.35	0.42	0.28	0.52
342	-	-	-	-	S	-	-	-	-	-	-	-	-0.09	1	0.17	0.68	-0.03	0.97	0.26	0.51	-1.4	7.6e-09	-1.6	7.3e-10
343	PF02801:Beta-ketoacyl synthase, C-terminal domain; PF00109:Beta-ketoacyl synthase, N-terminal domain; PF07993:Male sterility protein; PF08659:KR domain; PF00550:Phosphopantetheine attachment site; PF14765:Polyketide synthase dehydratase; PF00698:Acyl transferase domain; PF16197:Ketoacyl-synthetase C-terminal extension	-	-	-	S	-	-	-	PKS	GO:0048037,cofactor binding; GO:0008152,metabolic process; GO:0003824,catalytic activity; GO:0005488,binding	-	-	-0.099	1	0.33	0.51	0.28	0.77	0.42	0.37	-0.38	0.32	-0.43	0.28
344	-	-	-	-	-	-	-	-	-	-	-	-	0.064	1	0.53	0.0096	0.54	0.032	0.47	0.024	0.93	6e-08	0.93	1.1e-07
345	PF13450:NAD(P)-binding Rossmann-like domain	-	-	-	S	-	-	-	-	GO:0006118,electron transport; GO:0016491,oxidoreductase activity	-	-	0.012	1	1	0.047	0.15	0.88	1	0.048	-3.3	9.2e-25	-4.2	9.6e-26
346	PF07690:Major Facilitator Superfamily; PF07690:Major Facilitator Superfamily	-	-	-	S	-	-	-	-	GO:0005215,transporter activity; GO:0006810,transport; GO:0016021,integral to membrane	-	-	0.059	1	-0.35	0.23	-0.045	0.96	-0.41	0.15	-0.58	0.014	-0.27	0.28
347	PF02181:Formin Homology 2 Domain	-	-	-	-	-	-	-	-	GO:0003779,actin binding; GO:0016043,cellular component organization and biogenesis; GO:0030036,actin cytoskeleton organization and biogenesis	-	-	0.035	1	-0.082	0.81	0.09	0.9	-0.12	0.72	-0.55	0.012	-0.38	0.097
348	PF01156:Inosine-uridine preferring nucleoside hydrolase	-	-	-	-	Purine metabolism; Nicotinate and nicotinamide metabolism	-	-	-	GO:0008477,purine nucleosidase activity	3.2.2.1	-	-0.079	1	-0.35	0.091	-0.17	0.67	-0.27	0.2	-0.032	0.87	0.15	0.43
349	PF05327:RNA polymerase I specific transcription initiation factor RRN3	-	-	-	-	-	-	-	-	GO:0005488,binding	-	-	0.057	1	0.6	0.027	0.13	0.85	0.54	0.046	0.64	0.0042	0.18	0.49
350	PF16876:Lipin/Ned1/Smp2 multi-domain protein middle domain; PF08235:LNS2 (Lipin/Ned1/Smp2); PF04571:lipin, N-terminal conserved region	-	-	-	-	-	-	-	-	-	-	-	0.33	1	-0.6	0.13	0.14	0.9	-0.93	0.016	1	0.0013	1.8	1.7e-08
351	PF05347:Complex 1 protein (LYR family)	-	-	-	-	-	3.D.1.6.2	-	-	-	-	-	-0.11	1	0.1	0.77	-0.35	0.43	0.21	0.49	0.42	0.072	-0.029	0.92
352	PF07690:Major Facilitator Superfamily	-	-	-	-	-	2.A.1.13.4	-	-	-	-	-	0.56	0.9	1.3	0.0046	-0.24	0.85	0.77	0.12	2.9	4.2e-14	1.4	0.00068
353	PF00400:WD domain, G-beta repeat; PF07676:WD40-like Beta Propeller Repeat	-	-	-	-	-	-	MER134657	-	-	-	-	-0.0071	1	-0.094	0.59	-0.086	0.81	-0.087	0.63	-0.081	0.56	-0.073	0.61
354	-	-	-	-	S	-	-	-	-	-	-	-	-0.18	1	1.4	0.014	0.98	0.28	1.6	0.0049	2.4	5.5e-07	2	9.9e-05
355	PF09405:CASC3/Barentsz eIF4AIII binding; PF00106:short chain dehydrogenase	-	-	-	-	-	-	-	-	GO:0008152,metabolic process; GO:0016491,oxidoreductase activity; GO:0003824,catalytic activity; GO:0005488,binding	-	-	0.24	1	1.8	3.5e-08	0.73	0.11	1.5	2.8e-06	2.3	5e-16	1.3	1.1e-05
356	PF05783:Dynein light intermediate chain (DLIC); PF05783:Dynein light intermediate chain (DLIC)	-	-	-	-	-	-	-	-	GO:0003677,DNA binding; GO:0003774,motor activity	-	-	0.14	0.98	-0.0026	0.99	0.25	0.28	-0.15	0.38	0.62	1.4e-06	0.87	1.2e-11
357	PF04176:TIP41-like family	-	-	-	-	-	-	-	-	-	-	-	-0.24	0.9	-0.046	0.86	-0.098	0.85	0.19	0.39	-0.34	0.047	-0.39	0.023
358	PF02353:Mycolic acid cyclopropane synthetase	-	-	-	-	-	-	-	-	GO:0008610,lipid biosynthetic process; GO:0008825,cyclopropane-fatty-acyl-phospholipid synthase activity	2.1.1.79	-	-0.87	0.56	-0.72	0.18	0.087	0.96	0.16	0.81	-1.1	0.012	-0.28	0.55
359	PF08386:TAP-like protein; PF00561:alpha/beta hydrolase fold	-	-	-	S	-	-	MER064109	-	-	-	-	-0.21	1	-0.58	0.032	0.01	0.99	-0.37	0.19	-0.89	4.6e-05	-0.31	0.19
360	-	-	-	-	S	-	-	-	-	-	-	-	0.012	1	-0.56	0.1	-0.26	0.67	-0.58	0.093	-0.96	0.00039	-0.66	0.015
361	-	-	-	-	-	-	-	-	-	-	-	-	-0.032	1	-0.46	0.095	-0.47	0.19	-0.43	0.12	-0.34	0.16	-0.35	0.13
362	PF04116:Fatty acid hydroxylase superfamily	-	-	-	-	-	-	-	-	GO:0004784,superoxide dismutase activity; GO:0006801,superoxide metabolic process; GO:0046872,metal ion binding; GO:0004114,3',5'-cyclic-nucleotide phosphodiesterase activity; GO:0007165,signal transduction; GO:0003824,catalytic activity; GO:0008152,metabolic process; GO:0000254,C-4 methylsterol oxidase activity	1.14.13.72	-	-0.2	1	1.1	0.00074	0.0018	1	1.3	3.7e-05	-0.31	0.28	-1.4	3.3e-07
363	-	-	-	-	S	-	-	-	-	-	-	-	0.099	-	-0.91	-	-0.87	-	-1	0.54	-0.3	0.82	-0.26	0.88
364	-	-	-	-	S	-	-	-	-	GO:0015078,hydrogen ion transmembrane transporter activity; GO:0016469,proton-transporting two-sector ATPase complex	-	-	-0.44	0.91	-0.46	0.28	0.036	0.98	-0.011	0.99	0.74	0.045	1.2	0.00054
365	PF14027:Questin oxidase-like	-	-	-	-	-	-	-	-	-	-	-	0.4	1	0.91	0.33	0.089	0.98	0.51	0.62	2.1	0.0034	1.3	0.084
366	-	-	-	-	S	-	-	-	-	-	-	-	0.0065	1	0.56	0.28	0.31	-	0.55	0.29	-1.3	4.6e-05	-1.6	5.4e-05
367	-	-	-	-	S	-	-	-	-	-	-	-	-0.12	-	0.21	-	0	-	0.33	0.85	0.2	0.83	0	1
368	PF14027:Questin oxidase-like	-	-	-	-	-	-	-	-	-	-	-	-0.58	0.98	-1.3	0.046	-0.13	0.95	-0.68	0.31	1.8	0.00036	3	5e-09
369	PF12937:F-box-like	-	-	-	-	-	-	-	-	-	-	-	-0.39	1	-1.2	0.028	-0.21	0.9	-0.84	0.14	0.031	0.96	1.1	0.026
370	PF01053:Cys/Met metabolism PLP-dependent enzyme	-	-	-	-	-	-	-	-	GO:0006520,amino acid metabolic process; GO:0030170,pyridoxal phosphate binding; GO:0016765,transferase activity, transferring alkyl or aryl (other than methyl) groups; GO:0003961,O-acetylhomoserine aminocarboxypropyltransferase activity	2.5.1.49	-	0.34	0.56	-0.29	0.17	-0.33	0.26	-0.63	0.0009	1.5	4e-20	1.4	1.9e-19
371	-	-	-	-	-	-	-	-	-	-	-	-	0.21	-	-0.22	0.76	0.054	-	-0.43	0.53	0.59	0.29	0.87	0.12
372	PF00326:Prolyl oligopeptidase family	-	-	-	-	-	-	-	-	GO:0006508,proteolysis; GO:0008236,serine-type peptidase activity; GO:0004254,acylaminoacyl-peptidase activity	3.4.19.1	-	0.22	0.9	0.025	0.92	0.19	0.58	-0.19	0.34	0.77	6.8e-07	0.94	1.6e-09
373	-	-	-	-	S	-	-	-	-	-	-	-	0.13	1	0.53	0.5	1.1	-	0.4	0.63	-0.48	0.42	0.054	0.95
374	PF05721:Phytanoyl-CoA dioxygenase (PhyH)	-	-	-	-	-	-	-	-	-	-	-	-0.17	0.96	-0.41	0.014	-0.34	0.11	-0.24	0.17	0.054	0.74	0.12	0.44
375	-	-	-	-	-	-	-	-	-	-	-	-	-0.14	1	0.35	0.24	-0.29	0.56	0.49	0.084	-0.15	0.56	-0.78	0.0008
376	PF01553:Acyltransferase	-	-	-	S	-	-	-	-	GO:0008152,metabolic process; GO:0008415,acyltransferase activity	-	-	0.22	0.78	0.55	0.00027	-0.22	0.51	0.33	0.041	1.9	1.3e-39	1.1	4e-15
377	PF02128:Fungalysin metallopeptidase (M36); PF07504:Fungalysin/Thermolysin Propeptide Motif	-	-	-	S	-	-	MER107951	-	GO:0006508,proteolysis; GO:0008237,metallopeptidase activity; GO:0008270,zinc ion binding	-	-	0.078	1	-0.24	0.39	0.068	0.93	-0.32	0.23	0.79	0.00014	1.1	8.7e-08
378	PF00005:ABC transporter; PF00005:ABC transporter; PF00664:ABC transporter transmembrane region; PF00664:ABC transporter transmembrane region	-	-	-	-	-	3.A.1.208.3	-	-	GO:0005524,ATP binding; GO:0006810,transport; GO:0016021,integral to membrane; GO:0042626,ATPase activity, coupled to transmembrane movement of substances; GO:0016887,ATPase activity; GO:0000166,nucleotide binding; GO:0017111,nucleoside-triphosphatase activity	-	-	0.17	1	-0.55	0.095	0.14	0.87	-0.72	0.025	-0.085	0.79	0.61	0.026
379	PF07470:Glycosyl Hydrolase Family 88	-	-	-	S	-	-	-	-	GO:0003824,catalytic activity	-	-	0.58	0.82	-1.1	0.0073	-0.59	0.37	-1.7	1.2e-05	2.3	2.8e-11	2.8	1e-16
380	PF07859:alpha/beta hydrolase fold	-	-	-	-	-	-	MER219627	-	-	-	-	-1.2	0.31	-1.1	0.075	0.022	-	0.12	0.88	-1.8	0.00026	-0.66	0.18
381	PF00650:CRAL/TRIO domain; PF03765:CRAL/TRIO, N-terminal domain	-	-	-	-	-	-	-	-	GO:0004725,protein tyrosine phosphatase activity; GO:0004727,prenylated protein tyrosine phosphatase activity	3.1.3.48	-	-0.19	0.98	-0.35	0.095	-0.052	0.93	-0.16	0.48	-2.2	8.5e-49	-1.9	1.7e-36
382	-	-	-	-	S	-	-	-	-	-	-	-	0.076	1	-0.11	0.61	0.22	0.46	-0.18	0.36	-1.1	3.1e-13	-0.74	7e-07
383	PF03235:Protein of unknown function DUF262	-	-	-	-	-	-	-	-	-	-	-	-0.16	0.87	0.03	0.85	0.22	0.24	0.19	0.15	0.54	2.8e-07	0.73	6.3e-12
384	PF05557:Mitotic checkpoint protein	-	-	-	-	-	-	-	-	GO:0000166,nucleotide binding	-	-	0.0012	1	-0.11	0.51	0.34	0.076	-0.12	0.5	0.067	0.64	0.52	4.7e-05
385	PF08059:SEP domain; PF00789:UBX domain	-	-	-	-	-	-	-	-	-	-	-	0.048	1	0.058	0.84	-0.22	0.58	0.01	0.98	0.82	9.8e-06	0.54	0.0045
386	PF01454:MAGE family	-	-	-	-	-	-	-	-	-	-	-	-0.064	1	0.67	0.011	-0.13	0.85	0.74	0.0048	0.16	0.51	-0.65	0.0043
387	PF00091:Tubulin/FtsZ family, GTPase domain; PF03953:Tubulin C-terminal domain	-	-	-	-	-	-	-	-	GO:0005525,GTP binding; GO:0005874,microtubule; GO:0007017,microtubule-based process; GO:0005198,structural molecule activity; GO:0007018,microtubule-based movement; GO:0043234,protein complex; GO:0051258,protein polymerization; GO:0003924,GTPase activity	-	-	-0.12	1	0.27	0.35	0.13	0.85	0.38	0.15	-0.57	0.0087	-0.71	0.0011
388	PF00892:EamA-like transporter family; PF00892:EamA-like transporter family	-	-	-	-	-	-	-	-	GO:0016020,membrane	-	-	-0.12	1	-0.046	0.83	0.084	0.84	0.072	0.73	-0.32	0.024	-0.19	0.2
389	-	-	-	-	-	-	-	-	-	GO:0003676,nucleic acid binding; GO:0005622,intracellular; GO:0008270,zinc ion binding	-	-	0.047	1	0.7	0.059	0.91	0.029	0.65	0.077	-2.7	1.3e-20	-2.5	1.1e-17
390	PF04719:hTAFII28-like protein conserved region	-	-	-	-	-	-	-	-	GO:0003702,RNA polymerase II transcription factor activity; GO:0005634,nucleus; GO:0045449,regulation of transcription; GO:0003677,DNA binding	-	-	-0.041	1	-0.58	0.014	0.13	0.83	-0.54	0.023	0.039	0.87	0.75	0.00018
391	PF00096:Zinc finger, C2H2 type	TF	-	-	-	-	-	-	-	GO:0003676,nucleic acid binding; GO:0005622,intracellular; GO:0008270,zinc ion binding	-	-	0.14	1	-0.27	0.26	-0.19	0.66	-0.4	0.072	0.077	0.72	0.15	0.46
392	-	-	-	-	-	-	-	-	-	-	-	-	-0.069	1	-0.59	0.011	0.13	0.83	-0.52	0.026	0.28	0.18	0.99	3.2e-07
393	PF13489:Methyltransferase domain	-	-	-	S	-	-	-	-	GO:0008152,metabolic process; GO:0008168,methyltransferase activity	-	-	0.16	1	-0.21	0.47	-0.1	0.9	-0.37	0.18	0.46	0.045	0.57	0.012
394	PF13489:Methyltransferase domain	-	-	-	-	-	-	-	-	GO:0008152,metabolic process; GO:0008168,methyltransferase activity	-	-	0.23	1	0.3	0.53	-0.2	0.87	0.072	0.9	2.1	5.7e-09	1.6	8.2e-06
395	PF00071:Ras family	-	-	-	-	-	9.A.50.1.1	-	-	GO:0005525,GTP binding; GO:0007264,small GTPase mediated signal transduction; GO:0003924,GTPase activity; GO:0005515,protein binding; GO:0006886,intracellular protein transport; GO:0006913,nucleocytoplasmic transport; GO:0007165,signal transduction; GO:0005622,intracellular; GO:0015031,protein transport; GO:0003925,small monomeric GTPase activity	3.6.5.2	-	-0.22	0.85	-0.31	0.075	-0.17	0.55	-0.087	0.67	-0.56	5.8e-05	-0.42	0.0026
396	PF14378:PAP2 superfamily	-	-	-	-	-	-	-	-	GO:0003824,catalytic activity; GO:0016020,membrane; GO:0043842,Kdo transferase activity; GO:0051338,regulation of transferase activity; GO:0051972,regulation of telomerase activity	2.-.-.-	-	-0.05	1	-0.45	0.026	0.03	0.96	-0.4	0.049	-0.68	4.2e-05	-0.2	0.28
397	PF01031:Dynamin central region; PF02212:Dynamin GTPase effector domain; PF00350:Dynamin family	-	-	-	-	-	-	-	-	GO:0005525,GTP binding; GO:0003924,GTPase activity; GO:0008549,dynamin GTPase activity	3.6.5.5	-	0.041	1	0.038	0.94	-0.023	0.98	-0.0028	1	-1.5	6.6e-07	-1.6	7e-07
398	PF01095:Pectinesterase	-	-	CE8	S	-	-	-	-	GO:0005618,cell wall; GO:0030599,pectinesterase activity; GO:0042545,cell wall modification	-	-	1.2	0.48	-1.7	0.0085	-0.66	0.58	-3	1.2e-06	-3.3	5.7e-10	-2.3	3.2e-05
399	PF02463:RecF/RecN/SMC N terminal domain; PF06470:SMC proteins Flexible Hinge Domain; PF02463:RecF/RecN/SMC N terminal domain	-	-	-	S	-	-	-	-	GO:0005524,ATP binding; GO:0005694,chromosome; GO:0006259,DNA metabolic process; GO:0016887,ATPase activity; GO:0005515,protein binding; GO:0051276,chromosome organization and biogenesis	-	-	0.33	0.95	1	0.00097	0.37	0.51	0.69	0.034	0.73	0.0065	0.077	0.81
400	-	-	-	-	-	-	-	-	-	-	-	-	-0.08	1	0.28	0.23	0.19	0.67	0.36	0.11	1	1.1e-08	0.94	2.7e-07
401	PF03169:OPT oligopeptide transporter protein	-	-	-	-	-	2.A.67.1.1	-	-	-	-	-	-0.026	1	-0.21	0.6	-0.003	1	-0.19	0.66	0.11	0.74	0.32	0.31
402	PF00160:Cyclophilin type peptidyl-prolyl cis-trans isomerase/CLD	-	-	-	-	-	-	-	-	GO:0003755,peptidyl-prolyl cis-trans isomerase activity; GO:0006457,protein folding; GO:0004600,cyclophilin; GO:0030051,FK506-sensitive peptidyl-prolyl cis-trans isomerase; GO:0042027,cyclophilin-type peptidyl-prolyl cis-trans isomerase activity	5.2.1.8	-	-0.32	0.94	0.29	0.35	-0.48	0.21	0.61	0.035	-1.3	9.5e-09	-2.1	3.8e-20
403	PF08101:Domain of unknown function (DUF1708)	-	-	-	-	-	-	-	-	GO:0005622,intracellular; GO:0007165,signal transduction	-	-	0.1	1	-0.082	0.75	0.2	0.6	-0.18	0.42	0.1	0.6	0.38	0.03
404	PF01896:DNA primase small subunit	-	-	-	-	DNA polymerase; Ubiquinone biosynthesis	-	-	-	GO:0003896,DNA primase activity; GO:0006269,DNA replication, synthesis of RNA primer; GO:0003720,telomerase activity; GO:0003724,RNA helicase activity; GO:0003887,DNA-directed DNA polymerase activity; GO:0004779,sulfate adenylyltransferase activity; GO:0008192,RNA guanylyltransferase activity; GO:0008193,tRNA guanylyltransferase activity; GO:0008905,mannose-phosphate guanylyltransferase activity;…	2.7.7.-	-	0.13	1	0.77	0.0067	-0.7	0.041	0.64	0.027	0.85	0.00039	-0.62	0.012
405	PF00005:ABC transporter; PF00664:ABC transporter transmembrane region; PF00664:ABC transporter transmembrane region; PF00005:ABC transporter	-	-	-	S	-	3.A.1.208.12	-	-	GO:0005524,ATP binding; GO:0006810,transport; GO:0016021,integral to membrane; GO:0042626,ATPase activity, coupled to transmembrane movement of substances; GO:0016887,ATPase activity; GO:0000166,nucleotide binding; GO:0017111,nucleoside-triphosphatase activity	-	-	-0.048	1	0.81	0.033	0.051	0.97	0.86	0.022	0.83	0.0088	0.067	0.86
406	-	-	-	-	S	-	-	-	-	GO:0008800,beta-lactamase activity; GO:0030655,beta-lactam antibiotic catabolic process; GO:0046677,response to antibiotic	-	-	0.043	1	-1.9	3.2e-07	-0.035	0.98	-2	2.1e-07	-3.1	3e-20	-1.2	0.00046
407	PF01105:emp24/gp25L/p24 family/GOLD	-	-	-	S	-	-	-	-	-	-	-	-0.019	1	0.095	0.56	-0.34	0.038	0.11	0.47	0.33	0.005	-0.11	0.41
408	PF01207:Dihydrouridine synthase (Dus)	-	-	-	S	-	-	-	-	GO:0008033,tRNA processing; GO:0017150,tRNA dihydrouridine synthase activity; GO:0050660,FAD binding; GO:0043738,F420H2 dehydrogenase activity; GO:0043826,sulfur oxygenase reductase activity; GO:0043883,malolactic enzyme activity; GO:0051341,regulation of oxidoreductase activity	1.-.-.-	-	0.025	1	-0.28	0.15	-0.27	0.38	-0.3	0.11	0.59	0.00028	0.59	0.00019
409	PF13561:Enoyl-(Acyl carrier protein) reductase	-	-	-	-	Pentose and glucuronate interconversions	-	-	-	GO:0008152,metabolic process; GO:0016491,oxidoreductase activity; GO:0003824,catalytic activity; GO:0005488,binding; GO:0008678,2-deoxy-D-gluconate 3-dehydrogenase activity	1.1.1.125	-	-0.16	1	0.038	0.94	-0.55	0.27	0.2	0.64	-2.5	6.5e-18	-3	1.1e-26
410	PF00107:Zinc-binding dehydrogenase	-	-	-	S	Fructose and mannose metabolism	-	-	-	GO:0003824,catalytic activity; GO:0005488,binding; GO:0008152,metabolic process; GO:0003939,L-iditol 2-dehydrogenase activity	1.1.1.14	-	-0.27	1	-0.89	0.018	-0.61	0.21	-0.62	0.1	-3.7	8.9e-36	-3.4	3.5e-31
411	PF00891:O-methyltransferase domain	-	-	-	S	-	-	-	-	GO:0003824,catalytic activity; GO:0008171,O-methyltransferase activity	-	-	-0.91	0.89	-2.5	0.00037	-0.37	0.84	-1.6	0.033	-0.91	0.15	1.2	0.058
412	PF13378:Enolase C-terminal domain-like; PF02746:Mandelate racemase / muconate lactonizing enzyme, N-terminal domain; PF03572:Peptidase family S41	-	-	-	-	-	-	-	-	GO:0003824,catalytic activity; GO:0008152,metabolic process; GO:0006508,proteolysis; GO:0008236,serine-type peptidase activity	-	-	0.042	1	-0.86	3.9e-07	-0.16	0.66	-0.9	1.1e-07	0.14	0.39	0.84	4e-08
413	PF01480:PWI domain	-	-	-	-	-	-	-	-	GO:0006397,mRNA processing; GO:0003755,peptidyl-prolyl cis-trans isomerase activity; GO:0004600,cyclophilin; GO:0030051,FK506-sensitive peptidyl-prolyl cis-trans isomerase; GO:0042027,cyclophilin-type peptidyl-prolyl cis-trans isomerase activity	5.2.1.8	-	-0.027	1	0.19	0.47	0.2	0.67	0.22	0.4	0.45	0.023	0.46	0.023
414	PF00856:SET domain	-	-	-	-	-	-	-	-	GO:0005634,nucleus	-	-	-0.77	0.32	-0.78	0.044	0.0023	1	-0.013	0.99	-3	3.5e-25	-2.2	1.2e-14
415	-	-	-	-	S	-	-	-	-	-	-	-	-1.2	0.29	-0.9	0.12	-0.32	0.8	0.3	0.66	-2.5	5.9e-08	-1.9	3.6e-05
416	PF06703:Microsomal signal peptidase 25 kDa subunit (SPC25)	-	-	-	-	-	-	-	-	GO:0005787,signal peptidase complex; GO:0005792,microsome; GO:0006465,signal peptide processing; GO:0009003,signal peptidase activity; GO:0016021,integral to membrane	-	-	0.009	1	-0.019	0.92	-0.05	0.91	-0.028	0.89	-0.13	0.31	-0.16	0.21
417	PF04622:ERG2 and Sigma1 receptor like protein	-	-	-	S	-	-	-	-	GO:0000247,C-8 sterol isomerase activity; GO:0005783,endoplasmic reticulum; GO:0006696,ergosterol biosynthetic process	-	-	0.058	1	0.86	0.0097	0.073	0.95	0.8	0.016	-0.33	0.26	-1.1	5.7e-05
418	PF14497:Glutathione S-transferase, C-terminal domain	-	-	-	-	Glutathione metabolism	-	-	-	GO:0004364,glutathione transferase activity	2.5.1.18	-	-0.94	0.9	-0.38	0.69	0.49	0.79	0.56	0.54	-3.2	1.2e-06	-2.3	0.00054
419	PF01593:Flavin containing amine oxidoreductase	-	-	-	-	Porphyrin and chlorophyll metabolism	-	-	-	GO:0006118,electron transport; GO:0016491,oxidoreductase activity; GO:0004729,protoporphyrinogen oxidase activity; GO:0006779,porphyrin biosynthetic process	1.3.3.4	-	0.079	1	-0.29	0.11	-0.12	0.77	-0.37	0.037	0.54	0.00028	0.71	1.2e-06
420	-	-	-	-	S	-	-	-	-	-	-	-	-0.53	0.96	-0.66	0.25	-0.052	0.97	-0.13	0.86	-1.7	3e-05	-1.1	0.007
421	PF13450:NAD(P)-binding Rossmann-like domain	-	-	-	-	-	-	-	-	-	-	-	0.28	1	0.12	0.84	-0.4	0.63	-0.16	0.81	-3.9	3.6e-27	-4.4	5.8e-33
422	PF00644:Poly(ADP-ribose) polymerase catalytic domain	-	-	-	-	-	-	-	-	GO:0003950,NAD+ ADP-ribosyltransferase activity; GO:0005634,nucleus	-	-	-0.081	1	-0.25	0.44	-0.14	0.85	-0.17	0.63	-0.91	0.00011	-0.8	0.00073
423	PF14737:Domain of unknown function (DUF4470)	-	-	-	-	-	-	-	-	-	-	-	-0.19	0.98	0.31	0.17	0.41	0.14	0.5	0.022	-0.32	0.076	-0.22	0.27
424	-	-	-	-	S	-	-	-	-	-	-	-	0.28	1	0.47	0.44	-0.24	0.88	0.19	0.79	11	1.4e-116	11	4.3e-110
425	-	-	-	-	S	-	-	-	-	-	-	-	0.11	1	0.86	0.23	-0.11	0.96	0.75	0.3	5.4	4.8e-23	4.4	7.2e-16
426	PF14737:Domain of unknown function (DUF4470); PF01753:MYND finger	-	-	-	-	-	-	-	-	GO:0008270,zinc ion binding	-	-	-0.38	0.9	-0.32	0.35	0.21	0.75	0.059	0.9	-0.95	0.00027	-0.41	0.14
427	-	-	-	-	-	-	-	-	-	-	-	-	0.48	0.9	0.34	0.46	0.058	0.97	-0.14	0.8	1.2	0.00093	0.88	0.015
428	PF00122:E1-E2 ATPase; PF00690:Cation transporter/ATPase, N-terminus; PF00702:haloacid dehalogenase-like hydrolase; PF00689:Cation transporting ATPase, C-terminus; PF13246:Cation transport ATPase (P-type)	-	-	-	-	-	3.A.3.1.7	-	-	GO:0005524,ATP binding; GO:0006810,transport; GO:0015662,ATPase activity, coupled to transmembrane movement of ions, phosphorylative mechanism; GO:0016020,membrane; GO:0006812,cation transport; GO:0003824,catalytic activity; GO:0008152,metabolic process; GO:0016820,hydrolase activity, acting on acid anhydrides, catalyzing transmembrane movement of substances	-	-	1.2	0.67	1.1	0.17	0.02	0.99	-0.12	0.91	-2.7	2.1e-05	-3.8	1.7e-09
429	PF12937:F-box-like	-	-	-	S	-	-	-	-	-	-	-	-0.033	1	-0.24	0.49	0.26	0.68	-0.21	0.57	0.27	0.33	0.77	0.0036
430	-	-	-	-	-	-	-	-	-	-	-	-	0.43	1	1.6	0.011	0.17	0.94	1.2	0.07	2.5	2.4e-06	1	0.059
431	PF17667:Fungal protein kinase	-	-	-	-	-	-	-	-	GO:0004672,protein kinase activity; GO:0005524,ATP binding; GO:0006468,protein amino acid phosphorylation	-	-	0.14	1	0.76	0.05	0.15	0.9	0.62	0.11	0.88	0.0065	0.26	0.47
432	-	-	-	-	-	-	-	-	-	-	-	-	-0.27	1	-0.87	0.006	0.12	0.9	-0.59	0.062	-0.52	0.064	0.46	0.095
433	PF14737:Domain of unknown function (DUF4470)	-	-	-	-	-	-	-	-	-	-	-	-0.15	0.99	-0.19	0.33	-0.18	0.56	-0.036	0.88	0.021	0.91	0.024	0.9
434	-	-	-	-	S	-	-	-	-	-	-	-	0.25	1	0.38	0.53	0.37	-	0.13	0.86	0.4	0.4	0.38	0.46
435	-	-	-	-	-	-	-	-	-	-	-	-	-0.59	0.9	0.98	0.049	0.17	0.91	1.6	0.0008	4.5	2.2e-30	3.7	8.4e-21
436	PF14737:Domain of unknown function (DUF4470)	-	-	-	-	-	-	-	-	-	-	-	-0.054	1	-0.62	0.16	0.22	0.83	-0.56	0.2	-0.22	0.58	0.62	0.092
437	PF07690:Major Facilitator Superfamily	-	-	-	-	-	2.A.1.2.35	-	-	GO:0005215,transporter activity; GO:0006810,transport; GO:0016021,integral to membrane	-	-	1.2	0.00082	0.51	0.13	-0.66	0.12	-0.71	0.032	2.5	2.6e-20	1.3	1.9e-06
438	PF10186:Vacuolar sorting 38 and autophagy-related subunit 14	-	-	-	-	Purine metabolism; DNA polymerase; Pyrimidine metabolism	-	-	-	GO:0003887,DNA-directed DNA polymerase activity; GO:0034061,DNA polymerase activity	2.7.7.7	-	0.078	1	0.17	0.32	-0.16	0.61	0.091	0.63	0.4	0.0028	0.075	0.63
439	PF02212:Dynamin GTPase effector domain; PF01031:Dynamin central region; PF00350:Dynamin family	-	-	-	-	-	-	-	-	GO:0005525,GTP binding; GO:0003924,GTPase activity; GO:0008549,dynamin GTPase activity	3.6.5.5	-	0.064	1	0.56	0.017	0.4	0.2	0.49	0.037	-0.29	0.14	-0.45	0.028
440	-	-	-	-	S	-	-	-	-	-	-	-	-0.16	1	-1.2	7.3e-10	-0.38	0.23	-1.1	1.5e-07	-0.71	0.00017	0.15	0.45
441	-	-	-	-	S	-	-	-	-	-	-	-	0.93	0.88	-1.1	0.13	-0.86	0.47	-2.1	0.0038	1.6	0.01	1.8	0.0027
442	PF00075:RNase H	-	-	-	-	-	-	-	-	GO:0003676,nucleic acid binding; GO:0004523,ribonuclease H activity	-	-	-0.47	-	0.27	0.75	-0.057	-	0.74	0.32	-0.037	0.96	-0.36	0.59
443	-	-	-	-	S	-	-	-	-	-	-	-	-1.3	0.73	-0.44	0.66	-0.16	0.95	0.84	0.36	1.7	0.022	1.9	0.0072
444	PF07544:RNA polymerase II transcription mediator complex subunit 9	-	-	-	S	-	-	-	-	-	-	-	-0.77	0.94	-0.13	0.89	-0.19	0.94	0.65	0.41	2.1	0.00096	2	0.0012
445	PF00135:Carboxylesterase family	-	-	-	S	-	-	MER045882	-	GO:0004091,carboxylesterase activity	3.1.1.1	-	-2.6	0.37	-0.89	0.54	-0.15	0.97	1.7	0.22	1.9	0.061	2.6	0.011
446	-	-	-	-	S	-	-	-	-	GO:0006508,proteolysis; GO:0008237,metallopeptidase activity; GO:0008270,zinc ion binding	-	-	0.0059	1	-0.15	0.11	0.015	0.96	-0.16	0.097	-0.26	0.00071	-0.096	0.26
447	PF00067:Cytochrome P450	-	CYP62	-	-	-	-	-	-	GO:0004497,monooxygenase activity; GO:0005506,iron ion binding; GO:0006118,electron transport; GO:0020037,heme binding	-	-	0.46	0.98	1.1	0.021	-0.81	0.24	0.67	0.19	1.5	0.00021	-0.43	0.34
448	-	-	-	-	-	-	-	-	-	-	-	-	-0.39	0.98	-0.22	0.66	-0.037	0.98	0.17	0.74	-0.79	0.021	-0.61	0.082
449	-	-	-	-	-	-	-	-	-	-	-	-	0.035	-	1.2	0.21	-0.069	-	1.1	0.23	-0.11	0.89	-1.3	0.083
450	PF00782:Dual specificity phosphatase, catalytic domain	-	-	-	-	-	-	-	-	GO:0006470,protein amino acid dephosphorylation; GO:0008138,protein tyrosine/serine/threonine phosphatase activity; GO:0016311,dephosphorylation; GO:0016791,phosphoric monoester hydrolase activity; GO:0004725,protein tyrosine phosphatase activity	-	-	-0.57	0.81	-0.91	0.024	-0.56	0.36	-0.34	0.45	0.73	0.033	1.1	0.0013
451	PF10018:Vitamin-D-receptor interacting Mediator subunit 4	-	-	-	S	-	-	-	-	-	-	-	-0.28	1	-0.82	0.067	-0.71	0.33	-0.55	0.24	1	0.013	1.1	0.0032
452	PF00564:PB1 domain; PF00569:Zinc finger, ZZ type; PF00569:Zinc finger, ZZ type; PF00569:Zinc finger, ZZ type	-	-	-	-	-	-	-	-	GO:0008270,zinc ion binding	-	-	-0.16	1	-0.39	0.32	-0.13	0.9	-0.24	0.57	1.2	4.3e-05	1.5	5.4e-07
453	PF00571:CBS domain; PF00654:Voltage gated chloride channel	-	-	-	-	-	2.A.49.2.3	-	-	GO:0005247,voltage-gated chloride channel activity; GO:0006821,chloride transport; GO:0016020,membrane; GO:0005216,ion channel activity	-	-	-0.23	0.95	-0.28	0.22	-0.16	0.73	-0.059	0.85	-0.11	0.61	0.019	0.94
454	PF13649:Methyltransferase domain	-	-	-	-	-	-	MER103797	-	-	-	-	-0.01	1	-0.16	0.58	-0.29	0.51	-0.15	0.61	-0.17	0.45	-0.3	0.19
455	PF03647:Transmembrane proteins 14C	-	-	-	-	-	-	-	-	GO:0016020,membrane	-	-	0.4	0.92	-0.34	0.38	-0.8	0.055	-0.74	0.035	0.55	0.067	0.089	0.8
456	PF02636:Putative S-adenosyl-L-methionine-dependent methyltransferase	-	-	-	-	-	-	-	-	-	-	-	0.062	1	0.3	0.24	-0.024	0.98	0.24	0.37	0.74	0.00022	0.41	0.047
457	PF12460:RNAPII transcription regulator C-terminal; PF12460:RNAPII transcription regulator C-terminal; PF14500:Dos2-interacting transcription regulator of RNA-Pol-II	-	-	-	-	-	-	-	-	GO:0005524,ATP binding; GO:0016887,ATPase activity; GO:0005488,binding	-	-	-0.092	1	0.21	0.46	-0.094	0.9	0.3	0.26	1.6	4.9e-15	1.3	2.2e-10
458	-	-	-	-	-	-	-	-	-	-	-	-	-0.064	1	0.97	0.029	-0.46	0.54	1	0.018	-0.17	0.68	-1.6	1e-05
459	-	-	-	-	-	-	-	-	-	-	-	-	-0.82	0.87	-2.3	0.00017	0.4	0.7	-1.4	0.015	-9.2	3e-74	-6.5	6e-51
460	PF07929:Plasmid pRiA4b ORF-3-like protein; PF01753:MYND finger	-	-	-	-	-	-	-	-	GO:0008270,zinc ion binding	-	-	-0.068	1	-0.34	0.33	0.12	0.89	-0.27	0.45	-0.77	0.0032	-0.31	0.27
461	PF17667:Fungal protein kinase	-	-	-	-	-	-	-	-	GO:0004672,protein kinase activity; GO:0005524,ATP binding; GO:0006468,protein amino acid phosphorylation	-	-	0.15	1	0.28	0.24	-0.078	0.9	0.13	0.63	0.12	0.56	-0.24	0.23
462	-	-	-	-	-	-	-	-	-	-	-	-	-0.34	1	0.15	0.82	-0.39	0.66	0.49	0.38	-1.7	1.3e-05	-2.3	3.1e-08
463	-	-	-	-	-	-	-	-	-	-	-	-	-0.63	-	0.66	0.45	0.2	-	1.3	0.1	-0.33	0.63	-0.79	0.26
464	PF00083:Sugar (and other) transporter	-	-	-	-	Pentose and glucuronate interconversions	2.A.1.1.9	-	-	GO:0005351,sugar:hydrogen symporter activity; GO:0008643,carbohydrate transport; GO:0016020,membrane; GO:0005215,transporter activity; GO:0006810,transport; GO:0016021,integral to membrane; GO:0008733,L-arabinose isomerase activity	5.3.1.4	-	-0.12	1	-1.6	0.031	-0.57	0.71	-1.5	0.047	-5.9	2.9e-23	-4.9	3.4e-16
465	-	-	-	-	-	-	-	-	-	-	-	-	-0.31	0.9	-0.36	0.2	-0.08	0.92	-0.045	0.9	-0.42	0.067	-0.14	0.58
466	PF00076:RNA recognition motif. (a.k.a. RRM, RBD, or RNP domain)	-	-	-	-	-	-	-	-	GO:0003676,nucleic acid binding; GO:0003723,RNA binding; GO:0005634,nucleus; GO:0006397,mRNA processing	-	-	0.08	1	0.51	0.064	0.03	0.97	0.43	0.12	0.99	8e-06	0.51	0.027
467	-	-	-	-	S	-	-	-	-	-	-	-	0.18	1	0.048	0.9	-0.073	0.93	-0.13	0.7	0.9	7e-05	0.77	0.00066
468	PF14853:Fis1 C-terminal tetratricopeptide repeat; PF14852:Fis1 N-terminal tetratricopeptide repeat	-	-	-	-	-	-	-	-	-	-	-	-0.22	0.95	0.11	0.67	-0.26	0.46	0.33	0.13	-0.46	0.0098	-0.82	2.5e-06
469	PF13398:Peptidase M50B-like	-	-	-	S	-	-	-	-	GO:0006508,proteolysis; GO:0008237,metallopeptidase activity; GO:0008270,zinc ion binding	-	-	0.28	0.72	0.49	0.0097	-0.47	0.013	0.21	0.31	-0.99	4.6e-12	-2	8.4e-40
470	PF16211:C-terminus of histone H2A; PF00125:Core histone H2A/H2B/H3/H4	-	-	-	-	-	-	-	-	GO:0000786,nucleosome; GO:0003677,DNA binding; GO:0005634,nucleus; GO:0006334,nucleosome assembly	-	-	-0.013	1	0.37	0.043	-0.38	0.089	0.38	0.034	0.2	0.19	-0.54	0.00026
471	PF00620:RhoGAP domain	-	-	-	-	Tryptophan metabolism; Ubiquinone biosynthesis	-	-	-	GO:0005622,intracellular; GO:0007165,signal transduction; GO:0000287,magnesium ion binding; GO:0008897,phosphopantetheinyltransferase activity; GO:0009059,macromolecule biosynthetic process; GO:0008766,UDP-N-acetylmuramoylalanyl-D-glutamyl-2,6-diaminopimelate-D-alanyl-D-alanine ligase activity; GO:0018169,ribosomal S6-glutamic acid ligase activity; GO:0043773,coenzyme F420-0 gamma-glutamyl ligase…	6.3.2.-	-	0.35	0.048	0.52	8.5e-06	0.58	4.7e-06	0.17	0.21	0.7	1.2e-11	0.76	4.7e-13
472	PF00035:Double-stranded RNA binding motif	-	-	-	-	-	-	-	-	GO:0003723,RNA binding; GO:0004525,ribonuclease III activity; GO:0006396,RNA processing; GO:0003725,double-stranded RNA binding; GO:0005622,intracellular	-	-	-0.015	1	0.97	0.016	0.057	0.97	0.98	0.014	1	0.003	0.087	0.83
473	-	-	-	-	-	-	-	-	-	-	-	-	-0.11	1	0.14	0.8	0.9	0.19	0.25	0.63	2.3	5.7e-10	3.1	2.6e-15
474	PF00230:Major intrinsic protein	-	-	-	S	-	1.A.8.6.2	-	-	GO:0005215,transporter activity; GO:0006810,transport; GO:0016020,membrane	-	-	0.081	1	-0.072	0.91	0.35	0.71	-0.15	0.8	-0.79	0.039	-0.37	0.36
475	PF02020:eIF4-gamma/eIF5/eIF2-epsilon; PF01873:Domain found in IF2B/IF5	-	-	-	-	-	-	-	-	GO:0003743,translation initiation factor activity; GO:0006413,translational initiation; GO:0006446,regulation of translational initiation; GO:0005488,binding	-	-	0.067	1	0.15	0.58	0.1	0.87	0.083	0.78	-0.14	0.51	-0.18	0.38
476	PF00145:C-5 cytosine-specific DNA methylase	-	-	-	-	Methionine metabolism	-	-	-	GO:0003677,DNA binding; GO:0006306,DNA methylation; GO:0003886,DNA (cytosine-5-)-methyltransferase activity; GO:0051718,DNA (cytosine-5-)-methyltransferase activity, acting on CpG substrates; GO:0051719,DNA (cytosine-5-)-methyltransferase activity, acting on CpN substrates; GO:0051720,DNA (cytosine-5-)-methyltransferase activity, acting on CpNpG substrates	2.1.1.37	-	-0.13	1	0.76	0.012	-0.016	0.99	0.88	0.0027	-0.26	0.31	-1	3.6e-05
477	PF00628:PHD-finger	-	-	-	-	-	-	-	-	GO:0005515,protein binding; GO:0008270,zinc ion binding	-	-	0.032	1	-0.31	0.18	-0.18	0.7	-0.35	0.13	0.083	0.69	0.22	0.27
478	-	-	-	-	-	-	-	-	-	-	-	-	-0.57	0.98	1	0.11	0.28	0.89	1.6	0.0089	2.5	4.9e-06	1.7	0.0021
479	PF01363:FYVE zinc finger	-	-	-	-	-	-	-	-	GO:0008270,zinc ion binding	-	-	0.076	1	0.1	0.86	-0.47	0.55	0.029	0.97	-1.3	0.00032	-1.9	2.2e-07
480	-	-	-	-	S	-	-	-	-	GO:0003824,catalytic activity; GO:0005488,binding; GO:0008152,metabolic process	-	-	0.23	1	-2.1	0.0002	-0.38	0.77	-2.3	2.8e-05	-1.4	0.0052	0.33	0.56
481	-	-	-	-	S	-	-	-	-	-	-	-	-0.38	0.98	-0.51	0.22	-0.23	0.77	-0.13	0.79	-1.5	1.6e-06	-1.2	9.6e-05
482	PF00067:Cytochrome P450	-	CYP62	-	S	gamma-Hexachlorocyclohexane degradation; Ascorbate and aldarate metabolism; Flavonoids, stilbene and lignin biosynthesis; Fluorene degradation	-	-	-	GO:0004497,monooxygenase activity; GO:0005506,iron ion binding; GO:0006118,electron transport; GO:0020037,heme binding; GO:0018585,fluorene oxygenase activity; GO:0018586,mono-butyltin dioxygenase activity; GO:0018587,limonene 8-monooxygenase activity; GO:0018588,tri-n-butyltin dioxygenase activity; GO:0018589,di-n-butyltin dioxygenase activity; GO:0018590,methylsilanetriol hydroxylase activity; …	1.14.-.-	-	-2	-	-0.4	-	0.045	-	1.6	-	0.13	-	0.58	-
483	PF00067:Cytochrome P450	-	CYP62	-	S	Flavonoids, stilbene and lignin biosynthesis	-	-	-	GO:0004497,monooxygenase activity; GO:0005506,iron ion binding; GO:0006118,electron transport; GO:0020037,heme binding; GO:0016711,flavonoid 3'-monooxygenase activity	1.14.13.21	-	-0.51	0.75	-1	0.0023	-0.0095	0.99	-0.5	0.15	-4.6	1.6e-69	-3.6	3.9e-44
484	PF00067:Cytochrome P450	-	CYP62	-	S	-	-	-	-	GO:0004497,monooxygenase activity; GO:0005506,iron ion binding; GO:0006118,electron transport; GO:0020037,heme binding	-	-	-0.99	0.74	-1.3	0.047	-0.41	0.78	-0.34	0.67	-0.73	0.21	0.19	0.77
485	PF01237:Oxysterol-binding protein	-	-	-	-	-	-	-	-	GO:0008202,steroid metabolic process	-	-	0.075	1	0.033	0.9	0.29	0.31	-0.041	0.88	0.24	0.17	0.49	0.0027
486	-	-	-	-	S	-	-	-	-	-	-	-	0.052	1	-0.14	0.82	-0.23	-	-0.19	0.76	-0.86	0.026	-0.95	0.015
487	-	-	-	-	S	-	-	-	-	-	-	-	0.097	1	-0.27	0.25	0.55	0.038	-0.37	0.1	0.4	0.038	1.2	2.9e-11
488	-	-	-	-	-	-	-	-	-	-	-	-	0.084	1	0.12	0.58	0.14	0.71	0.039	0.89	-0.67	1.4e-05	-0.65	3.9e-05
489	PF04097:Nup93/Nic96	-	-	-	-	-	9.A.14.1.1	-	-	GO:0005643,nuclear pore; GO:0006810,transport	-	-	0.13	1	0.21	0.32	0.19	0.6	0.074	0.76	0.69	1.4e-05	0.67	2.9e-05
490	PF00515:Tetratricopeptide repeat; PF13181:Tetratricopeptide repeat	-	-	-	-	-	3.A.20.1.1	-	-	-	-	-	0.27	0.81	0.46	0.019	-0.23	0.44	0.18	0.4	-1.7	1.5e-28	-2.4	9.5e-54
491	PF03208:PRA1 family protein	-	-	-	S	-	-	-	-	-	-	-	-0.25	0.81	0.016	0.95	-0.16	0.63	0.27	0.15	-0.35	0.021	-0.53	0.00043
492	-	-	-	-	-	-	-	-	-	GO:0004871,signal transducer activity; GO:0007165,signal transduction	-	-	0.13	1	-0.026	0.91	0.18	0.57	-0.16	0.4	1	8.2e-13	1.2	5.7e-18
493	PF17827:PrmC N-terminal domain	-	-	-	S	Porphyrin and chlorophyll metabolism	-	-	-	GO:0006479,protein amino acid methylation; GO:0008276,protein methyltransferase activity; GO:0004729,protoporphyrinogen oxidase activity	1.3.3.4	-	-0.042	1	-0.072	0.85	0.19	0.77	-0.03	0.94	-0.13	0.64	0.14	0.62
494	PF01758:Sodium Bile acid symporter family	-	-	-	S	-	2.A.59.1.2	-	-	GO:0006814,sodium ion transport; GO:0008508,bile acid:sodium symporter activity; GO:0016020,membrane; GO:0016021,integral to membrane	-	-	-0.8	0.85	1.4	0.021	-0.52	0.65	2.2	0.00012	-1.3	0.0085	-3.3	7.4e-11
495	PF13561:Enoyl-(Acyl carrier protein) reductase	-	-	-	-	Pentose and glucuronate interconversions	-	-	-	GO:0008152,metabolic process; GO:0016491,oxidoreductase activity; GO:0003824,catalytic activity; GO:0005488,binding; GO:0008678,2-deoxy-D-gluconate 3-dehydrogenase activity	1.1.1.125	-	-0.072	1	0.061	0.86	-0.34	0.4	0.13	0.67	-0.48	0.027	-0.88	3.5e-05
496	PF13450:NAD(P)-binding Rossmann-like domain	-	-	-	S	-	-	-	-	GO:0006118,electron transport; GO:0016491,oxidoreductase activity	-	-	0.0095	1	-0.58	0.21	0.19	0.87	-0.59	0.2	-0.41	0.29	0.36	0.37
497	PF00254:FKBP-type peptidyl-prolyl cis-trans isomerase; PF17800:Nucleoplasmin-like domain	-	-	-	S	-	-	-	-	GO:0006457,protein folding; GO:0003755,peptidyl-prolyl cis-trans isomerase activity; GO:0004600,cyclophilin; GO:0030051,FK506-sensitive peptidyl-prolyl cis-trans isomerase; GO:0042027,cyclophilin-type peptidyl-prolyl cis-trans isomerase activity	5.2.1.8	-	-0.23	1	1.3	0.024	0.21	0.9	1.5	0.0067	1.8	7.2e-05	0.77	0.11
498	PF10261:Inositol phospholipid synthesis and fat-storage-inducing TM	-	-	-	S	-	-	-	-	-	-	-	-0.061	1	-0.17	0.53	-0.3	0.38	-0.11	0.72	-1	5e-08	-1.1	7.4e-10
499	PF00490:Delta-aminolevulinic acid dehydratase	-	-	-	-	Porphyrin and chlorophyll metabolism	-	-	-	GO:0004655,porphobilinogen synthase activity; GO:0033014,tetrapyrrole biosynthetic process; GO:0046872,metal ion binding	4.2.1.24	-	-0.036	1	0.41	0.094	-0.2	0.68	0.45	0.064	0.27	0.19	-0.34	0.11
500	PF00069:Protein kinase domain	-	-	-	-	Sphingoglycolipid metabolism; Benzoate degradation via CoA ligation; Starch and sucrose metabolism; Inositol phosphate metabolism; Nicotinate and nicotinamide metabolism	-	-	-	GO:0004672,protein kinase activity; GO:0005524,ATP binding; GO:0006468,protein amino acid phosphorylation; GO:0004713,protein-tyrosine kinase activity; GO:0004674,protein serine/threonine kinase activity; GO:0000287,magnesium ion binding; GO:0004427,inorganic diphosphatase activity; GO:0005737,cytoplasm; GO:0006796,phosphate metabolic process; GO:0008443,phosphofructokinase activity; GO:0008607,p…	2.7.1.-	-	0.096	1	0.49	0.22	0.14	0.9	0.39	0.34	1.7	1.8e-08	1.4	8.3e-06
501	-	-	-	-	-	-	-	-	-	-	-	-	0.7	-	0.56	-	-0.42	-	-0.14	0.98	-2.1	0.0031	-3.1	0.00045
502	-	-	-	-	S	-	-	-	-	-	-	-	1.3	-	-0.2	-	0.37	-	-1.5	0.25	0.11	0.94	0.69	0.55
503	PF17207:MCM OB domain; PF00493:MCM P-loop domain; PF17855:MCM AAA-lid domain; PF14551:MCM N-terminal domain; PF12619:Mini-chromosome maintenance protein 2	-	-	-	S	Purine metabolism	-	-	-	GO:0003677,DNA binding; GO:0005524,ATP binding; GO:0006270,DNA replication initiation; GO:0008094,DNA-dependent ATPase activity; GO:0005634,nucleus; GO:0004003,ATP-dependent DNA helicase activity; GO:0004004,ATP-dependent RNA helicase activity; GO:0008026,ATP-dependent helicase activity; GO:0008186,RNA-dependent ATPase activity; GO:0015462,protein-transmembrane transporting ATPase activity; GO:00…	3.6.1.3	-	-0.039	1	0.91	0.02	-0.2	0.85	0.95	0.014	1.7	2.2e-07	0.57	0.099
504	PF00005:ABC transporter; PF00664:ABC transporter transmembrane region	-	-	-	S	-	3.A.1.210.2	-	-	GO:0005524,ATP binding; GO:0006810,transport; GO:0016021,integral to membrane; GO:0042626,ATPase activity, coupled to transmembrane movement of substances; GO:0016887,ATPase activity; GO:0000166,nucleotide binding; GO:0017111,nucleoside-triphosphatase activity	-	-	0.31	0.88	0.48	0.058	0.12	0.85	0.17	0.56	1.1	2.2e-08	0.78	0.00017
505	PF00076:RNA recognition motif. (a.k.a. RRM, RBD, or RNP domain)	-	-	-	-	-	-	-	-	GO:0003676,nucleic acid binding	-	-	-0.17	1	-0.5	0.044	0.046	0.96	-0.34	0.19	0.07	0.77	0.62	0.0027
506	-	-	-	-	S	-	-	-	-	-	-	-	-0.28	0.94	-0.24	0.43	0.16	0.82	0.043	0.91	0.13	0.63	0.53	0.031
507	-	-	-	-	S	-	-	-	-	-	-	-	-0.27	1	-0.054	0.94	-0.35	-	0.22	0.78	0.76	0.16	0.46	0.41
508	-	-	-	-	-	-	-	-	-	-	-	-	0.13	1	0.41	0.6	-0.38	-	0.28	0.74	-1.9	0.00021	-2.7	1.4e-06
509	-	-	-	-	-	-	-	-	-	-	-	-	-0.18	1	0.34	0.34	0.41	0.48	0.52	0.12	0.77	0.0058	0.83	0.0038
510	-	-	-	-	-	-	-	-	-	-	-	-	0.53	-	0.5	-	-0.37	-	-0.027	0.99	1.5	0.18	0.66	0.59
511	PF08638:Mediator complex subunit MED14	-	-	-	S	-	-	-	-	-	-	-	-0.023	1	-0.094	0.63	0.44	0.019	-0.071	0.74	-0.23	0.11	0.31	0.03
512	-	-	-	-	-	-	-	-	-	GO:0004672,protein kinase activity; GO:0005524,ATP binding; GO:0006468,protein amino acid phosphorylation; GO:0005488,binding	2.7.1.37	-	0.016	1	0.26	0.2	0.22	0.51	0.24	0.23	0.63	7.7e-05	0.59	0.00025
513	PF08654:DASH complex subunit Dad2	-	-	-	-	-	-	-	-	-	-	-	-0.24	1	0.55	0.21	-0.43	0.54	0.79	0.062	-0.22	0.56	-1.2	0.00052
514	-	-	-	-	-	Starch and sucrose metabolism	-	-	-	GO:0004339,glucan 1,4-alpha-glucosidase activity	3.2.1.3	-	-0.048	1	-0.14	0.55	0.21	0.56	-0.092	0.72	-0.6	0.0003	-0.25	0.15
515	PF13409:Glutathione S-transferase, N-terminal domain	-	-	-	S	-	-	-	-	-	-	-	0.094	1	-1.4	0.00069	-0.34	0.71	-1.5	0.00024	1.3	0.00047	2.4	3.9e-11
516	PF07859:alpha/beta hydrolase fold	-	-	-	S	-	-	MER208921	-	-	-	-	-0.8	-	-0.68	0.49	-1.5	-	0.12	0.93	2.8	0.0017	2	0.013
517	PF01293:Phosphoenolpyruvate carboxykinase	-	-	-	S	Carbon fixation; Pyruvate metabolism; Citrate cycle (TCA cycle)	-	-	-	GO:0004612,phosphoenolpyruvate carboxykinase (ATP) activity; GO:0005524,ATP binding; GO:0006094,gluconeogenesis; GO:0004611,phosphoenolpyruvate carboxykinase activity; GO:0017076,purine nucleotide binding	4.1.1.49	-	0.62	0.72	-0.11	0.82	-0.23	0.8	-0.73	0.071	0.89	0.008	0.77	0.024
518	-	-	-	-	S	-	-	-	-	-	-	-	0.0063	1	0.25	0.57	-0.066	0.96	0.25	0.58	-0.53	0.093	-0.85	0.0079
519	PF00106:short chain dehydrogenase	-	-	-	-	Pentose and glucuronate interconversions	-	-	-	GO:0008152,metabolic process; GO:0016491,oxidoreductase activity; GO:0003824,catalytic activity; GO:0005488,binding; GO:0008678,2-deoxy-D-gluconate 3-dehydrogenase activity	1.1.1.125	-	0.16	-	0.86	-	-0.64	-	0.7	0.58	2.5	0.019	1	0.34
520	-	-	-	-	-	-	-	-	-	GO:0006118,electron transport; GO:0009055,electron carrier activity	-	-	-0.024	1	-0.24	0.4	-0.28	0.56	-0.21	0.46	1.1	7.2e-07	1	1.6e-06
521	PF02089:Palmitoyl protein thioesterase	-	-	-	S	-	-	-	-	GO:0006464,protein modification process; GO:0008474,palmitoyl-(protein) hydrolase activity	3.1.2.22	-	-0.18	1	-0.27	0.55	-0.29	0.73	-0.093	0.87	1.3	7.3e-05	1.3	8.8e-05
522	-	-	-	-	-	-	-	-	-	-	-	-	-0.53	0.94	0.17	0.79	-0.057	0.97	0.7	0.17	-0.019	0.97	-0.24	0.61
523	-	-	-	-	-	Inositol phosphate metabolism	-	-	-	GO:0004437,inositol or phosphatidylinositol phosphatase activity; GO:0004445,inositol-polyphosphate 5-phosphatase activity	3.1.3.56	-	0.29	0.88	0.0047	0.99	0.41	0.2	-0.29	0.25	0.58	0.0028	0.98	2.6e-07
524	-	-	-	-	-	-	-	-	-	-	-	-	0.1	1	0.067	0.75	0.11	0.78	-0.035	0.88	0.029	0.86	0.069	0.67
525	-	-	-	-	S	-	-	-	-	-	-	-	0.8	0.95	-1.2	0.12	-0.91	0.43	-2	0.0097	-6	2e-22	-5.7	3.4e-21
526	-	-	-	-	-	-	-	-	-	-	-	-	0.098	1	0.27	0.18	0.29	0.36	0.18	0.41	0.75	3.2e-06	0.77	3.8e-06
527	PF01966:HD domain	-	-	-	-	-	-	-	-	GO:0003824,catalytic activity	-	-	-0.48	0.48	0.68	0.0097	0.38	0.33	1.2	1.5e-06	-0.059	0.82	-0.36	0.13
528	-	-	-	-	-	-	-	-	-	GO:0005515,protein binding	-	-	-0.27	1	0.13	0.84	-0.76	-	0.41	0.49	-0.13	0.81	-1	0.021
529	-	-	-	-	-	-	-	-	-	-	-	-	-0.87	0.78	-1.1	0.073	0.33	0.82	-0.22	0.77	-2.3	3e-06	-0.86	0.097
530	-	-	-	-	-	-	-	-	-	-	-	-	-1.3	0.72	-2.3	0.0037	0.43	0.83	-1.1	0.21	-4.5	1.6e-11	-1.7	0.012
531	-	-	-	-	-	Purine metabolism	-	-	-	GO:0008570,myosin ATPase activity	3.6.4.1	-	-0.8	0.34	-1.2	0.00096	0.29	0.72	-0.44	0.3	-2.9	3.5e-21	-1.4	8.5e-06
532	-	-	-	-	-	-	-	-	-	-	-	-	-0.29	-	-0.15	0.86	0.31	-	0.13	0.87	-1.3	0.0039	-0.88	0.082
533	PF00106:short chain dehydrogenase	-	-	-	S	Bile acid biosynthesis; Vitamin B6 metabolism; Glycine, serine and threonine metabolism; Butanoate metabolism; Fructose and mannose metabolism; Galactose metabolism; Lysine degradation; Nucleotide sugars metabolism; Ascorbate and aldarate metabolism; Tetrachloroethene degradation; Benzoate degradation via CoA ligation; Glycerolipid metabolism	-	-	-	GO:0008152,metabolic process; GO:0016491,oxidoreductase activity; GO:0003824,catalytic activity; GO:0005488,binding; GO:0000252,C-3 sterol dehydrogenase (C-4 sterol decarboxylase) activity; GO:0000253,3-keto sterol reductase activity; GO:0004033,aldo-keto reductase activity; GO:0004448,isocitrate dehydrogenase activity; GO:0004495,mevaldate reductase activity; GO:0008875,gluconate dehydrogenase a…	1.1.1.-	-	-0.13	1	-0.1	0.76	-0.16	0.79	0.027	0.94	-2.3	6.7e-29	-2.4	8.8e-30
534	PF05368:NmrA-like family	-	-	-	S	-	-	-	-	GO:0006808,regulation of nitrogen utilization; GO:0016564,transcription repressor activity; GO:0003824,catalytic activity; GO:0005488,binding; GO:0008152,metabolic process	-	-	-0.16	0.85	-0.23	0.059	-0.053	0.87	-0.075	0.6	-0.22	0.032	-0.04	0.74
535	PF13673:Acetyltransferase (GNAT) domain	-	-	-	-	-	-	-	-	GO:0008080,N-acetyltransferase activity; GO:0008152,metabolic process	-	-	-0.31	1	-0.98	0.013	-0.39	0.59	-0.67	0.096	1.3	5e-05	1.9	2.6e-09
536	PF13508:Acetyltransferase (GNAT) domain	-	-	-	-	-	-	-	-	GO:0008080,N-acetyltransferase activity; GO:0008152,metabolic process	-	-	0.25	0.95	-0.22	0.42	-0.24	0.57	-0.47	0.059	-0.43	0.034	-0.46	0.025
537	-	-	-	-	-	-	-	-	-	-	-	-	-1.2	-	-3	-	0.3	-	-1.9	0.086	-1.9	0.054	1.4	0.13
538	-	-	-	-	-	-	-	-	-	-	-	-	-0.8	0.88	-2.6	5.2e-06	-0.07	0.97	-1.8	0.0026	-3.1	1.7e-09	-0.53	0.35
539	PF00149:Calcineurin-like phosphoesterase	-	-	-	-	-	-	-	-	GO:0016787,hydrolase activity; GO:0004721,phosphoprotein phosphatase activity; GO:0004723,calcium-dependent protein serine/threonine phosphatase activity; GO:0004724,magnesium-dependent protein serine/threonine phosphatase activity; GO:0005963,magnesium-dependent protein serine/threonine phosphatase complex; GO:0008420,CTD phosphatase activity; GO:0008597,calcium-dependent protein serine/threonin…	3.1.3.16	-	-0.16	1	0.2	0.46	0.28	0.48	0.36	0.14	0.18	0.39	0.27	0.21
540	PF00005:ABC transporter; PF00005:ABC transporter; PF12848:ABC transporter	-	-	-	-	-	3.A.1.121.4	-	-	GO:0005524,ATP binding; GO:0016887,ATPase activity; GO:0000166,nucleotide binding; GO:0017111,nucleoside-triphosphatase activity	-	-	-0.081	1	0.53	0.2	0.22	0.82	0.61	0.13	0.97	0.0031	0.65	0.054
541	PF00687:Ribosomal protein L1p/L10e family	-	-	-	-	-	-	-	-	GO:0003735,structural constituent of ribosome; GO:0005622,intracellular; GO:0005840,ribosome; GO:0006412,translation	-	-	-0.14	1	1	0.1	0.066	0.97	1.2	0.058	2.2	1.3e-05	1.2	0.018
542	PF00637:Region in Clathrin and VPS	-	-	-	-	-	-	-	-	GO:0005515,protein binding; GO:0006886,intracellular protein transport; GO:0016192,vesicle-mediated transport; GO:0000166,nucleotide binding; GO:0004812,aminoacyl-tRNA ligase activity; GO:0005524,ATP binding; GO:0005737,cytoplasm; GO:0006412,translation; GO:0006418,tRNA aminoacylation for protein translation; GO:0005488,binding	-	-	0.051	1	-0.061	0.79	0.35	0.13	-0.11	0.59	0.27	0.075	0.68	4.1e-06
543	PF01248:Ribosomal protein L7Ae/L30e/S12e/Gadd45 family	-	-	-	-	-	-	-	-	GO:0003735,structural constituent of ribosome; GO:0005622,intracellular; GO:0005840,ribosome; GO:0006412,translation	-	-	-0.082	1	1.1	0.08	-0.061	0.98	1.2	0.058	2.6	4.5e-07	1.4	0.0079
544	PF00400:WD domain, G-beta repeat; PF00400:WD domain, G-beta repeat	-	-	-	-	-	-	-	-	-	-	-	-0.098	1	0.2	0.22	-0.23	0.3	0.3	0.055	-0.11	0.45	-0.54	2.3e-05
545	PF00043:Glutathione S-transferase, C-terminal domain; PF02798:Glutathione S-transferase, N-terminal domain	-	-	-	-	Glutathione metabolism	-	-	-	GO:0004364,glutathione transferase activity	2.5.1.18	-	-1.5	0.78	1.9	0.057	0.76	0.73	3.4	0.0025	-0.45	0.65	-1.6	0.048
546	-	-	-	-	-	-	-	-	-	-	-	-	-0.52	0.9	-0.0062	0.99	-0.55	0.5	0.51	0.27	2.1	1.3e-08	1.6	1.4e-05
547	-	-	-	-	S	-	-	-	-	-	-	-	0.24	-	0.22	-	-0.43	-	-0.02	0.98	3.6	0.00039	2.9	0.0054
548	-	-	-	-	-	-	-	-	-	-	-	-	0	-	0	-	0.39	-	0	1	-2.6	0.034	-1.9	0.12
549	-	-	-	-	-	-	-	-	-	-	-	-	0.16	1	-0.62	0.067	-0.12	0.9	-0.78	0.019	-0.47	0.1	0.025	0.94
550	PF12937:F-box-like	-	-	-	-	-	-	-	-	-	-	-	0.09	1	-0.045	0.93	0.13	0.88	-0.14	0.77	-2.4	1.9e-19	-2.2	4e-16
551	-	-	-	-	-	-	-	-	-	-	-	-	0	-	-0.32	-	-0.16	-	-0.31	0.84	-0.33	0.76	-0.17	0.9
552	-	-	-	-	-	-	-	-	-	-	-	-	0.0076	1	0.84	0.044	0.69	0.39	0.83	0.045	1.6	1.4e-05	1.4	0.00047
553	-	-	-	-	-	-	-	-	-	-	-	-	-0.13	1	-0.047	0.91	-0.04	0.97	0.079	0.85	-0.0094	0.98	-0.0024	1
554	-	-	-	-	-	-	-	-	-	-	-	-	-0.38	0.95	-0.61	0.11	-0.022	0.99	-0.23	0.59	-0.76	0.013	-0.17	0.61
555	-	-	-	-	-	-	-	-	-	-	-	-	-0.41	0.77	0.047	0.9	0.26	0.61	0.45	0.11	-1.7	3.6e-14	-1.5	5.5e-11
556	-	-	-	-	S	-	-	-	-	-	-	-	0.1	1	0.82	0.05	0.028	0.98	0.72	0.086	-0.87	0.0051	-1.7	6.7e-07
557	PF10377:Autophagy-related protein 11	-	-	-	-	-	-	-	-	-	-	-	0.0037	1	-0.083	0.72	0.34	0.22	-0.087	0.72	0.66	4.1e-05	1.1	1.3e-11
558	PF00083:Sugar (and other) transporter	-	-	-	-	Pentose and glucuronate interconversions	2.A.1.1.9	-	-	GO:0005215,transporter activity; GO:0006810,transport; GO:0016021,integral to membrane; GO:0016020,membrane; GO:0008733,L-arabinose isomerase activity	5.3.1.4	-	0.4	1	-1.6	0.014	-0.33	0.84	-2	0.0015	-0.25	0.69	1	0.072
559	-	-	-	-	-	-	-	-	-	GO:0008152,metabolic process; GO:0016740,transferase activity; GO:0003824,catalytic activity; GO:0005488,binding	-	-	0.29	1	2.7	0.031	-0.9	0.72	2.4	0.052	2.2	0.048	-1.5	0.16
560	PF00107:Zinc-binding dehydrogenase; PF08240:Alcohol dehydrogenase GroES-like domain	-	-	-	-	Bile acid biosynthesis; Tyrosine metabolism; Glycerolipid metabolism; Glycolysis / Gluconeogenesis; Fatty acid metabolism	-	-	-	GO:0003824,catalytic activity; GO:0005488,binding; GO:0008152,metabolic process; GO:0004022,alcohol dehydrogenase activity; GO:0004023,alcohol dehydrogenase activity, metal ion-independent; GO:0004024,alcohol dehydrogenase activity, zinc-dependent; GO:0004025,alcohol dehydrogenase activity, iron-dependent	1.1.1.1	-	0.29	1	2.9	0.029	-0.65	0.82	2.6	0.048	2.7	0.016	-0.84	0.44
561	PF00258:Flavodoxin; PF00667:FAD binding domain; PF00067:Cytochrome P450; PF00175:Oxidoreductase NAD-binding domain	-	CYP50	-	-	-	-	-	-	GO:0005506,iron ion binding; GO:0006118,electron transport; GO:0009055,electron carrier activity; GO:0010181,FMN binding; GO:0004497,monooxygenase activity; GO:0020037,heme binding; GO:0016491,oxidoreductase activity; GO:0003958,NADPH-hemoprotein reductase activity	1.6.2.4	-	0.27	0.94	0.75	0.0033	0.036	0.96	0.48	0.074	-0.53	0.012	-1.2	5.3e-09
562	-	-	-	-	S	-	-	-	-	-	-	-	-0.17	1	-0.11	0.74	0.46	0.21	0.051	0.89	-1.3	7.6e-09	-0.7	0.0021
563	-	-	-	-	-	-	-	-	-	-	-	-	0.089	1	1.2	0.044	0.53	0.6	1.1	0.062	-0.51	0.3	-1.1	0.018
564	PF00743:Flavin-binding monooxygenase-like	-	-	-	-	-	-	-	-	GO:0004499,flavin-containing monooxygenase activity; GO:0050660,FAD binding; GO:0050661,NADP binding; GO:0003824,catalytic activity; GO:0005488,binding; GO:0008152,metabolic process	1.14.13.8	-	-0.24	0.82	-0.43	0.012	0.021	0.97	-0.2	0.29	0.89	5e-09	1.3	1.6e-19
565	PF03908:Sec20	-	-	-	-	-	-	-	-	-	-	-	-0.12	1	-0.18	0.48	-0.2	0.65	-0.062	0.84	-0.21	0.29	-0.23	0.26
566	PF00153:Mitochondrial carrier protein; PF00153:Mitochondrial carrier protein; PF00153:Mitochondrial carrier protein	-	-	-	-	-	2.A.29.12.1	-	-	GO:0005488,binding; GO:0006810,transport; GO:0016020,membrane; GO:0005743,mitochondrial inner membrane	-	-	-0.066	1	0.64	0.034	0.046	0.97	0.7	0.017	1.5	3.9e-09	0.87	0.0007
567	PF00107:Zinc-binding dehydrogenase; PF08240:Alcohol dehydrogenase GroES-like domain	-	-	-	S	-	-	-	-	GO:0003824,catalytic activity; GO:0005488,binding; GO:0008152,metabolic process; GO:0003960,NADPH:quinone reductase activity	1.6.5.5	-	0.49	-	0.13	0.88	0.11	-	-0.36	0.68	0.5	0.43	0.48	0.47
568	PF00628:PHD-finger	-	-	-	-	-	-	-	-	GO:0000785,chromatin; GO:0003682,chromatin binding; GO:0005634,nucleus; GO:0006333,chromatin assembly or disassembly; GO:0005515,protein binding; GO:0008270,zinc ion binding	-	-	-0.054	1	0.12	0.56	0.31	0.17	0.17	0.36	-0.29	0.043	-0.094	0.56
569	PF00083:Sugar (and other) transporter	-	-	-	-	-	2.A.1.1.9	-	-	GO:0005215,transporter activity; GO:0006810,transport; GO:0016021,integral to membrane; GO:0003715,transcription termination factor activity; GO:0006353,transcription termination	-	-	0.027	1	0.48	0.0044	0.41	0.036	0.45	0.0077	-0.73	1.2e-07	-0.8	1.1e-08
570	PF14703:Cytosolic domain of 10TM putative phosphate transporter; PF02714:Calcium-dependent channel, 7TM region, putative phosphate; PF13967:Late exocytosis, associated with Golgi transport; PF12621:Extracellular tail, of 10TM putative phosphate transporter	-	-	-	S	-	-	-	-	GO:0016020,membrane; GO:0006508,proteolysis; GO:0008237,metallopeptidase activity; GO:0008270,zinc ion binding	-	-	-0.24	1	0.095	0.87	0.88	0.11	0.33	0.51	-3.3	4.3e-21	-2.5	1.1e-12
571	-	-	-	-	-	-	-	-	-	-	-	-	-	-	-	-	-	-	-	-	-	-	-	-
572	-	-	-	-	-	-	-	-	-	-	-	-	-0.04	-	1.8	0.038	0.64	-	1.8	0.033	0.067	0.93	-1.1	0.15
573	-	-	-	-	-	-	-	-	-	-	-	-	0.064	1	0.25	0.67	-0.19	0.87	0.19	0.77	-2.1	8.5e-09	-2.6	2.7e-11
574	-	-	-	-	-	-	-	-	-	-	-	-	-0.21	1	0.85	0.19	0.56	-	1.1	0.091	-2	1.6e-06	-2.3	4.3e-06
575	PF00753:Metallo-beta-lactamase superfamily	-	-	-	-	-	-	-	-	GO:0016787,hydrolase activity	-	-	-0.76	0.93	-0.27	0.76	-0.068	0.98	0.49	0.52	-3.1	9.4e-09	-2.9	9.4e-08
576	-	-	-	-	-	-	-	-	-	-	-	-	-0.25	1	0.44	0.2	0.0084	0.99	0.69	0.034	-1.3	4.7e-08	-1.7	1.8e-11
577	-	-	-	-	S	-	-	-	-	-	-	-	0.68	1	2.1	0.041	-0.17	0.95	1.5	0.17	6.5	1.4e-15	4.2	1.8e-07
578	PF00083:Sugar (and other) transporter	-	-	-	S	-	2.A.1.1.69	-	-	GO:0005215,transporter activity; GO:0006810,transport; GO:0016021,integral to membrane	-	-	-0.018	-	1.9	-	-0.45	-	1.9	0.03	0.3	0.66	-2.1	0.0063
579	-	-	-	-	-	-	-	-	-	-	-	-	-0.0022	-	0.063	-	0	-	0.065	0.97	0.053	0.96	0	1
580	PF00018:SH3 domain	-	-	-	S	-	-	-	-	GO:0005515,protein binding	-	-	0.18	1	-0.25	0.56	0.22	0.89	-0.43	0.29	2.3	4.5e-09	2.8	1.8e-12
581	PF00617:RasGEF domain; PF00618:RasGEF N-terminal motif	-	-	-	-	-	-	-	-	GO:0005085,guanyl-nucleotide exchange factor activity; GO:0005622,intracellular; GO:0051056,regulation of small GTPase mediated signal transduction; GO:0007264,small GTPase mediated signal transduction; GO:0005509,calcium ion binding	-	-	0.13	1	-0.2	0.59	0.068	0.95	-0.34	0.34	-0.38	0.18	-0.1	0.75
582	-	-	-	-	-	-	-	-	-	-	-	-	-0.065	1	0.12	0.72	0.55	0.19	0.19	0.56	0.66	0.0048	1.1	7.9e-06
583	PF00106:short chain dehydrogenase	-	-	-	-	-	-	-	-	GO:0003824,catalytic activity; GO:0005488,binding; GO:0008152,metabolic process	-	-	-1.1	-	0.35	0.68	0.081	-	1.4	0.062	-2.1	0.00016	-2.4	0.00021
584	-	-	-	-	-	-	-	-	-	-	-	-	-0.054	-	0.44	0.54	-0.68	-	0.49	0.49	0.31	0.59	-0.81	0.15
585	PF01968:Hydantoinase/oxoprolinase; PF05378:Hydantoinase/oxoprolinase N-terminal region	-	-	-	-	Glutathione metabolism	-	-	-	GO:0016787,hydrolase activity; GO:0017168,5-oxoprolinase (ATP-hydrolyzing) activity	3.5.2.9	-	-0.11	1	-0.44	0.03	-0.33	0.25	-0.33	0.11	0.45	0.008	0.56	0.0008
586	PF03031:NLI interacting factor-like phosphatase	-	-	-	S	-	-	-	-	-	-	-	-0.098	1	-0.41	0.044	0.19	0.63	-0.31	0.13	0.41	0.019	1	2.2e-09
587	PF03725:3' exoribonuclease family, domain 2; PF01138:3' exoribonuclease family, domain 1	-	-	-	-	-	-	-	-	GO:0000175,3'-5'-exoribonuclease activity; GO:0003723,RNA binding; GO:0006396,RNA processing; GO:0004534,5'-3' exoribonuclease activity	3.1.13.-	-	-0.091	1	0.39	0.23	0.067	0.95	0.48	0.13	0.48	0.069	0.16	0.59
588	PF03966:Trm112p-like protein	-	-	-	S	-	-	-	-	-	-	-	-0.26	1	0.41	0.28	-0.22	0.78	0.67	0.062	0.26	0.41	-0.38	0.23
589	PF10417:C-terminal domain of 1-Cys peroxiredoxin; PF00578:AhpC/TSA family	-	-	-	-	-	-	-	-	GO:0016209,antioxidant activity; GO:0016491,oxidoreductase activity; GO:0051920,peroxiredoxin activity	1.11.1.15	-	-0.2	1	1.5	0.0014	-0.11	0.95	1.7	0.00021	1.6	8.2e-05	-0.025	0.96
590	-	-	-	-	-	-	-	-	-	-	-	-	-0.27	0.88	0.031	0.92	-0.14	0.77	0.3	0.18	-0.71	4.3e-05	-0.88	4.3e-07
591	PF01435:Peptidase family M48	-	-	-	S	-	-	MER236526	-	GO:0004222,metalloendopeptidase activity; GO:0006508,proteolysis; GO:0016020,membrane; GO:0008237,metallopeptidase activity; GO:0008270,zinc ion binding	-	-	0.042	1	0.32	0.065	-0.074	0.87	0.28	0.11	0.16	0.29	-0.23	0.12
592	PF03746:LamB/YcsF family	-	-	-	-	-	-	-	-	-	-	-	-0.26	0.98	0.29	0.37	-0.56	0.085	0.56	0.063	-4.3	3.4e-88	-5.2	2.3e-116
593	PF02786:Carbamoyl-phosphate synthase L chain, ATP binding domain; PF00289:Biotin carboxylase, N-terminal domain	-	-	-	-	-	-	-	-	GO:0003824,catalytic activity; GO:0005524,ATP binding; GO:0008152,metabolic process; GO:0009374,biotin binding; GO:0016874,ligase activity	-	-	0.66	0.94	0.85	0.21	1.1	0.23	0.19	0.83	-0.039	0.95	0.19	0.78
594	PF00364:Biotin-requiring enzyme; PF02786:Carbamoyl-phosphate synthase L chain, ATP binding domain; PF02785:Biotin carboxylase C-terminal domain; PF02626:Carboxyltransferase domain, subdomain A and B; PF02682:Carboxyltransferase domain, subdomain C and D	-	-	-	S	Valine, leucine and isoleucine degradation	-	-	-	GO:0009374,biotin binding; GO:0003824,catalytic activity; GO:0005524,ATP binding; GO:0008152,metabolic process; GO:0016874,ligase activity; GO:0004485,methylcrotonoyl-CoA carboxylase activity	6.4.1.4	-	0.31	1	0.67	0.073	0.53	0.28	0.37	0.36	-3.3	4.6e-32	-3.4	6.9e-33
595	PF01494:FAD binding domain	-	-	-	-	-	-	-	-	GO:0008152,metabolic process; GO:0016491,oxidoreductase activity	-	-	0.98	0.041	0.45	0.21	0.91	0.02	-0.52	0.14	0.15	0.65	0.6	0.041
596	-	-	-	-	S	-	-	-	-	-	-	-	0.87	0.19	0.67	0.083	-0.36	0.63	-0.2	0.65	2.7	1.8e-17	1.6	2.1e-07
597	-	-	-	-	-	-	-	-	-	-	-	-	-0.85	-	-0.9	-	-0.047	-	-0.053	0.97	-1.7	0.0096	-0.89	0.18
598	PF00702:haloacid dehalogenase-like hydrolase	-	-	-	-	Vitamin B6 metabolism; Porphyrin and chlorophyll metabolism; Nicotinate and nicotinamide metabolism; Thiamine metabolism; Aminosugars metabolism; Riboflavin metabolism	-	-	-	GO:0003824,catalytic activity; GO:0008152,metabolic process; GO:0001668,phosphatidylinositol-4,5-bisphosphate 5-phosphatase activity; GO:0008138,protein tyrosine/serine/threonine phosphatase activity; GO:0008330,protein tyrosine/threonine phosphatase activity; GO:0008579,JUN kinase phosphatase activity; GO:0008969,phosphohistidine phosphatase activity; GO:0016312,inositol bisphosphate phosphatase…	3.1.3.-	-	-0.87	0.9	0.69	0.39	0.69	0.61	1.6	0.033	-4.1	4.1e-12	-4.1	4.1e-12
599	PF00067:Cytochrome P450	-	CYP60	-	-	-	-	-	-	GO:0004497,monooxygenase activity; GO:0005506,iron ion binding; GO:0006118,electron transport; GO:0020037,heme binding	-	-	0.14	-	1.3	0.075	0.44	-	1.1	0.11	-0.39	0.49	-1.2	0.044
600	-	-	-	-	-	-	-	-	-	-	-	-	-0.024	1	-0.049	0.94	0.83	-	-0.025	0.97	3.8	1.4e-08	4.7	1.8e-08
601	PF10404:Rad4 beta-hairpin domain 2; PF01841:Transglutaminase-like superfamily; PF10405:Rad4 beta-hairpin domain 3; PF03835:Rad4 transglutaminase-like domain; PF10403:Rad4 beta-hairpin domain 1	-	-	-	-	-	-	-	-	GO:0003684,damaged DNA binding; GO:0005634,nucleus; GO:0006289,nucleotide-excision repair	-	-	0.094	1	0.21	0.58	0.36	0.54	0.11	0.79	0.72	0.0087	0.87	0.0017
602	PF08704:tRNA methyltransferase complex GCD14 subunit; PF08704:tRNA methyltransferase complex GCD14 subunit	-	-	-	-	-	-	-	-	-	-	-	0.084	1	0.93	0.0004	-0.037	0.97	0.85	0.0015	0.57	0.014	-0.4	0.1
603	PF08447:PAS fold	-	-	-	-	-	-	-	-	GO:0004871,signal transducer activity; GO:0007165,signal transduction	-	-	0.089	1	-0.42	0.17	0.38	0.42	-0.5	0.089	-0.13	0.62	0.66	0.0075
604	PF00067:Cytochrome P450	-	CYP51	-	S	Tryptophan metabolism; Fatty acid metabolism; gamma-Hexachlorocyclohexane degradation	-	-	-	GO:0004497,monooxygenase activity; GO:0005506,iron ion binding; GO:0006118,electron transport; GO:0020037,heme binding; GO:0050381,unspecific monooxygenase activity	1.14.14.1	-	0.21	0.98	-0.15	0.56	0.31	0.36	-0.35	0.12	-0.19	0.32	0.26	0.18
605	-	-	-	-	S	-	-	-	-	-	-	-	0.14	1	-0.78	0.0026	-0.14	0.83	-0.92	0.00026	-1.2	2.9e-08	-0.56	0.013
606	PF00271:Helicase conserved C-terminal domain; PF00270:DEAD/DEAH box helicase; PF16124:RecQ zinc-binding	-	-	-	-	Starch and sucrose metabolism; Folate biosynthesis	-	-	-	GO:0003676,nucleic acid binding; GO:0004386,helicase activity; GO:0005524,ATP binding; GO:0006310,DNA recombination; GO:0008026,ATP-dependent helicase activity; GO:0000810,diacylglycerol pyrophosphate phosphatase activity; GO:0004787,thiamin-pyrophosphatase activity; GO:0008413,8-oxo-7,8-dihydroguanine triphosphatase activity; GO:0008758,UDP-2,3-diacylglucosamine hydrolase activity; GO:0008796,bi…	3.6.1.-	-	0.06	1	0.56	0.016	0.35	0.3	0.5	0.032	-0.081	0.71	-0.29	0.15
607	PF00795:Carbon-nitrogen hydrolase	-	-	-	-	Nicotinate and nicotinamide metabolism; Pantothenate and CoA biosynthesis; Arginine and proline metabolism; Lipopolysaccharide biosynthesis	-	-	-	GO:0006807,nitrogen compound metabolic process; GO:0016810,hydrolase activity, acting on carbon-nitrogen (but not peptide) bonds; GO:0004407,histone deacetylase activity; GO:0008418,protein N-terminal asparagine amidohydrolase activity; GO:0008759,UDP-3-O-[3-hydroxymyristoyl] N-acetylglucosamine deacetylase activity; GO:0018748,iprodione amidohydrolase activity; GO:0018749,(3,5-dichlorophenylurea…	3.5.1.-	-	0.013	1	-0.46	0.14	-0.017	0.99	-0.47	0.12	-0.76	0.0023	-0.31	0.24
608	PF01073:3-beta hydroxysteroid dehydrogenase/isomerase family	-	-	-	-	-	-	-	-	GO:0003854,3-beta-hydroxy-delta5-steroid dehydrogenase activity; GO:0006694,steroid biosynthetic process; GO:0003824,catalytic activity; GO:0005488,binding; GO:0008152,metabolic process; GO:0000252,C-3 sterol dehydrogenase (C-4 sterol decarboxylase) activity; GO:0047012,sterol-4-alpha-carboxylate 3-dehydrogenase (decarboxylating) activity	1.1.1.170	-	-0.074	1	0.34	0.0098	0.045	0.91	0.42	0.0012	0.046	0.71	-0.25	0.029
609	-	-	-	-	S	-	-	-	-	-	-	-	0.088	1	-0.6	0.022	-0.22	0.66	-0.68	0.0079	-0.97	4.9e-06	-0.6	0.0064
610	PF00153:Mitochondrial carrier protein; PF00153:Mitochondrial carrier protein; PF00153:Mitochondrial carrier protein	-	-	-	S	-	2.A.29.27.1	-	-	GO:0005488,binding; GO:0006810,transport; GO:0016020,membrane; GO:0005743,mitochondrial inner membrane	-	-	0.19	0.97	0.37	0.057	-0.023	0.97	0.18	0.39	-0.1	0.57	-0.49	0.002
611	-	-	-	-	-	-	-	-	-	-	-	-	0.21	0.98	-0.11	0.69	0.22	0.59	-0.32	0.16	0.13	0.5	0.46	0.014
612	PF00755:Choline/Carnitine o-acyltransferase	-	-	-	S	Alanine and aspartate metabolism	4.C.2.1.1	-	-	GO:0008415,acyltransferase activity; GO:0004092,carnitine O-acetyltransferase activity	2.3.1.7	-	0.28	0.9	0.17	0.5	-0.09	0.89	-0.1	0.73	-0.94	5.4e-07	-1.2	9.9e-11
613	-	-	-	-	-	-	-	-	-	-	-	-	0.079	1	0.88	0.0085	-0.24	0.75	0.8	0.017	1.4	4.1e-07	0.3	0.34
614	PF00538:linker histone H1 and H5 family	-	-	-	-	-	-	-	-	GO:0000786,nucleosome; GO:0003677,DNA binding; GO:0005634,nucleus; GO:0006334,nucleosome assembly	-	-	0.049	1	0.91	0.086	0.00052	1	0.86	0.1	2.6	2.1e-09	1.7	0.00015
615	PF00642:Zinc finger C-x8-C-x5-C-x3-H type (and similar); PF00642:Zinc finger C-x8-C-x5-C-x3-H type (and similar); PF00642:Zinc finger C-x8-C-x5-C-x3-H type (and similar)	-	-	-	-	-	-	-	-	GO:0003676,nucleic acid binding; GO:0008270,zinc ion binding	-	-	-0.34	1	-2.3	1.1e-08	-0.26	0.8	-1.9	1.8e-06	-3.9	6.3e-28	-1.9	2.3e-07
616	PF01126:Heme oxygenase	-	-	-	S	Porphyrin and chlorophyll metabolism	-	-	-	GO:0004392,heme oxygenase (decyclizing) activity; GO:0006788,heme oxidation	1.14.99.3	-	-0.034	1	-0.63	4.4e-07	-0.027	0.95	-0.6	2.2e-06	-0.7	4.1e-10	-0.098	0.44
617	-	-	-	-	S	-	-	-	-	-	-	-	0.079	1	-0.25	0.52	0.031	0.98	-0.33	0.39	-0.47	0.11	-0.19	0.56
618	PF00026:Eukaryotic aspartyl protease	-	-	-	S	-	-	MER254825	-	GO:0004194,pepsin A activity; GO:0006508,proteolysis; GO:0004190,aspartic-type endopeptidase activity	3.4.23.1	-	0.34	1	-2.1	0.00034	-0.2	0.92	-2.5	1.9e-05	-4.8	9.5e-22	-2.9	1.6e-08
619	-	-	-	-	S	-	-	-	-	-	-	-	0.62	0.56	-0.3	0.45	-0.48	0.39	-0.92	0.0096	0.031	0.93	-0.15	0.66
620	PF00651:BTB/POZ domain	-	-	-	-	-	-	-	-	GO:0005515,protein binding	-	-	-0.38	0.83	-0.85	0.002	-0.35	0.45	-0.46	0.11	-0.024	0.94	0.47	0.051
621	PF00410:Ribosomal protein S8	-	-	-	S	-	-	-	-	GO:0003735,structural constituent of ribosome; GO:0005622,intracellular; GO:0005840,ribosome; GO:0006412,translation	-	-	0.033	1	1.2	0.042	-0.2	0.91	1.2	0.047	1.4	0.006	-0.055	0.93
622	PF00833:Ribosomal S17	-	-	-	-	-	-	-	-	GO:0003735,structural constituent of ribosome; GO:0005622,intracellular; GO:0005840,ribosome; GO:0006412,translation	-	-	-0.048	1	1	0.099	-0.11	0.96	1.1	0.08	1.3	0.0095	0.18	0.77
623	PF00248:Aldo/keto reductase family; PF00248:Aldo/keto reductase family	-	-	-	-	Benzoate degradation via CoA ligation; Ethylbenzene degradation	8.A.5.1.3	-	-	GO:0016491,oxidoreductase activity; GO:0004344,glucose dehydrogenase activity; GO:0018446,pinocarveol dehydrogenase activity; GO:0018447,chloral hydrate dehydrogenase activity; GO:0018448,hydroxymethylmethylsilanediol oxidase activity; GO:0018449,1-phenylethanol dehydrogenase activity; GO:0018450,myrtenol dehydrogenase activity; GO:0042469,versicolorin reductase activity; GO:0045703,ketoreductase…	1.1.-.-	-	-0.46	0.68	0.26	0.43	-0.37	0.42	0.72	0.014	-1.5	5.5e-11	-2.2	2.1e-20
624	-	-	-	-	-	-	-	-	-	GO:0005515,protein binding	-	-	0.058	1	-0.39	0.36	0.16	0.88	-0.45	0.29	-0.41	0.23	0.14	0.71
625	-	-	-	-	-	-	-	-	-	-	-	-	-0.097	1	0.54	0.21	-0.027	0.98	0.63	0.13	-0.25	0.49	-0.81	0.019
626	PF02867:Ribonucleotide reductase, barrel domain; PF00317:Ribonucleotide reductase, all-alpha domain; PF03477:ATP cone domain	-	-	-	-	Pyrimidine metabolism; Purine metabolism	-	-	-	GO:0004748,ribonucleoside-diphosphate reductase activity; GO:0005971,ribonucleoside-diphosphate reductase complex; GO:0006260,DNA replication; GO:0005515,protein binding	1.17.4.1	-	0.15	1	1.1	0.0043	-0.076	0.95	0.92	0.015	0.96	0.0026	-0.19	0.6
627	PF02055:Glycosyl hydrolase family 30 TIM-barrel domain	-	-	GH30_3	S	Sphingoglycolipid metabolism	-	-	-	GO:0004348,glucosylceramidase activity; GO:0005764,lysosome; GO:0006665,sphingolipid metabolic process; GO:0007040,lysosome organization and biogenesis	3.2.1.45	-	-0.38	0.91	-1.1	0.00043	-0.14	0.88	-0.71	0.03	0.73	0.0084	1.7	2.4e-10
628	-	-	-	-	-	Sphingoglycolipid metabolism; Benzoate degradation via CoA ligation; Starch and sucrose metabolism; Inositol phosphate metabolism; Nicotinate and nicotinamide metabolism	-	-	-	GO:0004672,protein kinase activity; GO:0005524,ATP binding; GO:0006468,protein amino acid phosphorylation; GO:0004674,protein serine/threonine kinase activity; GO:0008443,phosphofructokinase activity; GO:0008607,phosphorylase kinase regulator activity; GO:0008819,cobinamide kinase activity; GO:0016307,phosphatidylinositol phosphate kinase activity; GO:0016538,cyclin-dependent protein kinase regul…	2.7.1.-	-	-0.1	1	0.075	0.8	-0.035	0.96	0.18	0.49	0.32	0.1	0.21	0.31
629	PF00487:Fatty acid desaturase	-	-	-	-	-	-	-	-	GO:0016491,oxidoreductase activity; GO:0006629,lipid metabolic process; GO:0016020,membrane; GO:0016717,oxidoreductase activity, acting on paired donors, with oxidation of a pair of donors resulting in the reduction of molecular oxygen to two molecules of water; GO:0050184,phosphatidylcholine desaturase activity	1.3.1.35	-	-0.2	1	0.69	0.031	-0.061	0.95	0.89	0.0042	1.4	9.9e-08	0.63	0.02
630	PF01090:Ribosomal protein S19e	-	-	-	-	-	-	-	-	GO:0003735,structural constituent of ribosome; GO:0005622,intracellular; GO:0005840,ribosome; GO:0006412,translation	-	-	-0.039	1	0.98	0.095	-0.26	0.86	1	0.078	1.5	0.0011	0.3	0.57
631	PF12937:F-box-like	-	-	-	-	-	-	-	-	-	-	-	0.11	1	-0.31	0.11	-0.034	0.96	-0.42	0.024	0.14	0.41	0.41	0.0096
632	PF00962:Adenosine/AMP deaminase	-	-	-	-	Purine metabolism	-	-	-	GO:0009168,purine ribonucleoside monophosphate biosynthetic process; GO:0019239,deaminase activity; GO:0003876,AMP deaminase activity	3.5.4.6	-	-0.11	1	-0.11	0.63	0.3	0.23	0.0092	0.98	-0.61	5.7e-05	-0.2	0.22
633	PF02776:Thiamine pyrophosphate enzyme, N-terminal TPP binding domain; PF00205:Thiamine pyrophosphate enzyme, central domain; PF02775:Thiamine pyrophosphate enzyme, C-terminal TPP binding domain	-	-	-	-	Glycolysis / Gluconeogenesis	-	-	-	GO:0003824,catalytic activity; GO:0030976,thiamin pyrophosphate binding; GO:0000287,magnesium ion binding; GO:0016831,carboxy-lyase activity; GO:0004737,pyruvate decarboxylase activity	4.1.1.1	-	-0.33	1	1.4	0.17	0.63	0.78	1.7	0.083	-0.51	0.58	-1.3	0.13
634	PF08324:PUL domain; PF05903:PPPDE putative peptidase domain; PF00085:Thioredoxin	-	-	-	-	-	-	-	-	GO:0045454,cell redox homeostasis; GO:0005488,binding	-	-	0.17	0.95	0.17	0.33	0.13	0.7	0.0033	0.99	0.93	1.7e-12	0.89	2e-11
635	-	-	-	-	-	-	-	-	-	-	-	-	-	-	-	-	-	-	-	-	-	-	-	-
636	-	-	-	-	-	Photosynthesis; Porphyrin and chlorophyll metabolism	-	-	-	GO:0006118,electron transport; GO:0004324,ferredoxin-NADP+ reductase activity; GO:0015039,NADPH-adrenodoxin reductase activity	1.18.1.2	-	0.12	1	0.49	0.21	-0.037	0.98	0.37	0.36	1.6	1.2e-07	1.1	0.00046
637	PF05328:CybS, succinate dehydrogenase cytochrome B small subunit	-	-	-	-	Citrate cycle (TCA cycle); Oxidative phosphorylation	3.A.8.1.1	-	-	GO:0005506,iron ion binding; GO:0005740,mitochondrial envelope; GO:0006099,tricarboxylic acid cycle; GO:0006118,electron transport; GO:0016021,integral to membrane; GO:0020037,heme binding; GO:0008177,succinate dehydrogenase (ubiquinone) activity	1.3.5.1	-	0.062	1	0.21	0.49	-0.24	0.65	0.15	0.64	0.82	0.00025	0.38	0.11
638	PF01031:Dynamin central region; PF02212:Dynamin GTPase effector domain; PF00350:Dynamin family	-	-	-	S	-	-	-	-	GO:0005525,GTP binding; GO:0003924,GTPase activity; GO:0008549,dynamin GTPase activity	3.6.5.5	-	-1.2	0.83	-4.5	1.6e-08	-0.77	0.66	-3.3	7.5e-05	-4.5	3.2e-10	-0.81	0.32
639	PF08982:Domain of unknown function (DUF1857)	-	-	-	S	-	-	-	-	-	-	-	-0.086	1	0.58	0.48	-0.51	0.73	0.66	0.41	-1.1	0.069	-2.2	0.00026
640	PF00248:Aldo/keto reductase family	-	-	-	S	Benzoate degradation via CoA ligation; Ethylbenzene degradation	8.A.5.1.3	-	-	GO:0016491,oxidoreductase activity; GO:0004344,glucose dehydrogenase activity; GO:0018446,pinocarveol dehydrogenase activity; GO:0018447,chloral hydrate dehydrogenase activity; GO:0018448,hydroxymethylmethylsilanediol oxidase activity; GO:0018449,1-phenylethanol dehydrogenase activity; GO:0018450,myrtenol dehydrogenase activity; GO:0042469,versicolorin reductase activity; GO:0045703,ketoreductase…	1.1.-.-	-	-0.18	1	0.14	0.81	-0.19	0.87	0.32	0.53	-1.3	0.00033	-1.6	6.7e-06
641	PF00248:Aldo/keto reductase family	-	-	-	-	Benzoate degradation via CoA ligation; Ethylbenzene degradation	-	-	-	GO:0016491,oxidoreductase activity; GO:0004344,glucose dehydrogenase activity; GO:0018446,pinocarveol dehydrogenase activity; GO:0018447,chloral hydrate dehydrogenase activity; GO:0018448,hydroxymethylmethylsilanediol oxidase activity; GO:0018449,1-phenylethanol dehydrogenase activity; GO:0018450,myrtenol dehydrogenase activity; GO:0042469,versicolorin reductase activity; GO:0045703,ketoreductase…	1.1.-.-	-	-0.018	1	-0.029	0.96	-0.042	0.97	-0.011	0.99	0.69	0.037	0.68	0.043
642	PF02935:Cytochrome c oxidase subunit VIIc	-	-	-	S	Oxidative phosphorylation	3.D.4.8.1	-	-	GO:0004129,cytochrome-c oxidase activity; GO:0006118,electron transport; GO:0009481,aa3-type cytochrome c oxidase; GO:0009482,ba3-type cytochrome c oxidase; GO:0009483,caa3-type cytochrome c oxidase; GO:0009485,cbb3-type cytochrome c oxidase	1.9.3.1	-	-0.7	1	0.65	0.55	-0.61	0.78	1.4	0.17	-1.1	0.19	-2.4	0.0035
643	PF01636:Phosphotransferase enzyme family	-	-	-	-	-	-	-	-	-	-	-	-0.31	0.91	-0.47	0.095	-0.21	0.73	-0.16	0.63	-0.04	0.89	0.22	0.38
644	-	-	-	-	-	-	-	-	-	-	-	-	0.38	-	0.27	-	0.043	-	0	1	0.054	0.97	-0.17	0.88
645	PF13472:GDSL-like Lipase/Acylhydrolase family	-	-	CE16	S	-	-	-	-	GO:0006629,lipid metabolic process; GO:0016788,hydrolase activity, acting on ester bonds	-	-	-0.25	1	0.18	0.66	-0.52	0.18	0.43	0.23	-1.4	1.6e-08	-2.1	4.9e-16
646	-	-	-	-	-	-	-	-	-	-	-	-	1.4	0.017	0.033	0.96	0.2	0.86	-1.3	0.0019	-1.6	3.6e-06	-1.5	4e-05
647	PF03079:ARD/ARD' family	-	-	-	-	-	-	-	-	GO:0018553,3-(2,3-dihydroxyphenyl)propionate 1,2-dioxygenase activity; GO:0018554,1,2-dihydroxynaphthalene dioxygenase activity	1.13.-.-	-	-0.66	0.96	-1.3	0.042	-0.3	0.86	-0.68	0.33	-3.9	1.2e-13	-2.9	7.5e-08
648	PF00400:WD domain, G-beta repeat; PF00400:WD domain, G-beta repeat; PF07690:Major Facilitator Superfamily; PF11816:Domain of unknown function (DUF3337)	-	-	-	-	-	-	-	-	-	-	-	0.087	1	0.027	0.92	-0.03	0.96	-0.061	0.81	0.65	4.7e-05	0.59	0.00023
649	PF01399:PCI domain	-	-	-	-	-	-	-	-	-	-	-	0.099	1	0.22	0.55	0.19	0.8	0.12	0.77	0.86	0.0011	0.83	0.0018
650	PF00520:Ion transport protein; PF00520:Ion transport protein; PF00520:Ion transport protein; PF00520:Ion transport protein	-	-	-	-	-	1.A.1.11.17	-	-	GO:0005216,ion channel activity; GO:0006811,ion transport; GO:0016020,membrane	-	-	0.01	1	0.12	0.64	0.33	0.29	0.11	0.68	-0.31	0.11	-0.093	0.66
651	PF03981:Ubiquinol-cytochrome C chaperone; PF03981:Ubiquinol-cytochrome C chaperone	-	-	-	-	-	-	-	-	-	-	-	-0.18	1	0.64	0.088	-0.013	0.99	0.82	0.025	0.99	0.0012	0.33	0.32
652	-	-	-	-	-	-	-	-	-	-	-	-	0.021	1	-0.23	0.22	0.064	0.9	-0.25	0.17	0.28	0.068	0.57	0.00012
653	PF00004:ATPase family associated with various cellular activities (AAA); PF08519:Replication factor RFC1 C terminal domain; PF00533:BRCA1 C Terminus (BRCT) domain	-	-	-	-	-	-	-	-	GO:0005622,intracellular; GO:0000166,nucleotide binding; GO:0017111,nucleoside-triphosphatase activity; GO:0005524,ATP binding; GO:0003677,DNA binding; GO:0005634,nucleus; GO:0006260,DNA replication; GO:0003689,DNA clamp loader activity; GO:0005663,DNA replication factor C complex; GO:0003911,DNA ligase (NAD+) activity	6.5.1.2	-	0.2	0.97	0.5	0.016	0.39	0.15	0.3	0.17	0.15	0.42	0.038	0.86
654	PF00026:Eukaryotic aspartyl protease	-	-	-	S	-	8.A.32.1.1	MER155787	-	GO:0004194,pepsin A activity; GO:0006508,proteolysis; GO:0004190,aspartic-type endopeptidase activity	3.4.23.1	-	-0.048	1	1.6	0.0016	0.27	-	1.6	0.001	-0.5	0.15	-1.8	2.4e-05
655	PF14604:Variant SH3 domain	-	-	-	S	-	-	-	-	-	-	-	0.34	1	1.1	0.068	0.12	0.95	0.74	0.23	3	3.7e-10	2	3e-05
656	-	-	-	-	-	-	-	-	-	-	-	-	0.42	0.98	-0.43	0.36	-0.71	0.2	-0.84	0.055	-0.8	0.025	-1.1	0.0018
657	PF00732:GMC oxidoreductase; PF05199:GMC oxidoreductase	-	-	AA3_3	-	Glycine, serine and threonine metabolism	-	-	-	GO:0016614,oxidoreductase activity, acting on CH-OH group of donors; GO:0050660,FAD binding; GO:0006066,alcohol metabolic process; GO:0008812,choline dehydrogenase activity	1.1.99.1	Fenton	0.11	1	-1.8	0.1	-0.54	0.82	-1.9	0.079	2.6	0.0025	3.8	8.5e-06
658	-	-	-	-	-	-	-	-	-	-	-	-	-0.42	0.94	0.53	0.19	0.046	0.97	0.95	0.014	0.62	0.062	0.14	0.72
659	PF17862:AAA+ lid domain; PF00004:ATPase family associated with various cellular activities (AAA); PF00004:ATPase family associated with various cellular activities (AAA)	-	-	-	-	Purine metabolism	-	-	-	GO:0000166,nucleotide binding; GO:0017111,nucleoside-triphosphatase activity; GO:0005524,ATP binding; GO:0005515,protein binding; GO:0004003,ATP-dependent DNA helicase activity; GO:0004004,ATP-dependent RNA helicase activity; GO:0008026,ATP-dependent helicase activity; GO:0008094,DNA-dependent ATPase activity; GO:0008186,RNA-dependent ATPase activity; GO:0015462,protein-transmembrane transporting…	3.6.1.3	-	-0.02	1	-0.17	0.5	0.28	0.42	-0.15	0.56	0.32	0.089	0.76	2e-05
660	PF03644:Glycosyl hydrolase family 85	-	-	GH85	-	-	-	-	-	-	-	-	-0.11	1	-0.85	0.00031	-0.11	0.87	-0.74	0.002	0.69	0.0011	1.4	2.5e-12
661	-	-	-	-	-	-	-	-	-	-	-	-	0.045	1	0.56	0.041	0.48	0.2	0.51	0.06	0.26	0.27	0.18	0.48
662	PF00076:RNA recognition motif. (a.k.a. RRM, RBD, or RNP domain); PF00076:RNA recognition motif. (a.k.a. RRM, RBD, or RNP domain)	-	-	-	S	-	-	-	-	GO:0003676,nucleic acid binding	-	-	0.082	1	0.43	0.3	0.23	0.8	0.35	0.41	1.5	5.8e-06	1.3	0.00011
663	PF05843:Suppressor of forked protein (Suf)	-	-	-	-	-	-	-	-	GO:0005622,intracellular; GO:0006396,RNA processing; GO:0005634,nucleus; GO:0006397,mRNA processing	-	-	-0.094	1	0.097	0.67	0.47	0.053	0.19	0.35	1.5	2.3e-22	1.9	4.6e-33
664	PF00190:Cupin; PF00190:Cupin	-	-	-	S	-	-	-	-	-	-	-	-0.26	1	-0.39	0.39	0.18	0.87	-0.13	0.81	-1.2	0.00046	-0.6	0.084
665	-	-	-	-	-	-	-	-	-	-	-	-	-	-	-	-	-	-	-	-	-	-	-	-
666	PF00190:Cupin; PF00190:Cupin	-	-	-	S	-	-	-	-	GO:0045735,nutrient reservoir activity	-	Fenton	-0.77	1	-1	0.3	0.43	0.84	-0.26	0.84	7	3.6e-23	8.5	3.6e-33
667	PF01174:SNO glutamine amidotransferase family	-	-	-	S	-	-	MER064209	-	-	2.6.-.-	-	-0.3	0.43	-0.11	0.56	-0.23	0.41	0.19	0.25	1.2	1.4e-19	1.1	1.5e-16
668	PF00450:Serine carboxypeptidase	-	-	-	S	-	-	MER169389	-	GO:0004185,serine carboxypeptidase activity; GO:0006508,proteolysis	3.4.16.-	-	-0.87	-	-0.34	-	-0.36	-	0.53	-	-0.76	-	-0.79	-
669	PF00450:Serine carboxypeptidase	-	-	-	-	-	-	MER254695	-	GO:0004185,serine carboxypeptidase activity; GO:0006508,proteolysis	-	-	-0.06	1	-0.8	0.079	-0.37	0.67	-0.74	0.1	-1.5	3.9e-05	-1.1	0.0038
670	-	-	-	-	-	-	-	-	-	-	-	-	0	-	-0.23	-	-0.26	-	-0.22	0.87	0	1	-0.12	0.92
671	-	-	-	-	-	-	-	-	-	-	-	-	0.35	1	-0.23	0.73	0.89	0.53	-0.58	0.32	3.5	1.1e-09	4.6	2e-12
672	PF02518:Histidine kinase-, DNA gyrase B-, and HSP90-like ATPase; PF00072:Response regulator receiver domain; PF00512:His Kinase A (phospho-acceptor) domain	-	-	-	-	Type II secretion system	-	-	-	GO:0000156,two-component response regulator activity; GO:0000160,two-component signal transduction system (phosphorelay); GO:0006355,regulation of transcription, DNA-dependent; GO:0005524,ATP binding; GO:0000155,two-component sensor activity; GO:0007165,signal transduction; GO:0016020,membrane; GO:0016310,phosphorylation; GO:0016772,transferase activity, transferring phosphorus-containing groups;…	2.7.3.-	-	0.22	1	-0.031	0.94	0.53	0.15	-0.25	0.43	-0.24	0.34	0.32	0.2
673	PF00288:GHMP kinases N terminal domain; PF08544:GHMP kinases C terminal; PF01053:Cys/Met metabolism PLP-dependent enzyme	-	-	-	-	Sterol biosynthesis	-	-	-	GO:0006520,amino acid metabolic process; GO:0030170,pyridoxal phosphate binding; GO:0005524,ATP binding; GO:0016301,kinase activity; GO:0016310,phosphorylation; GO:0004496,mevalonate kinase activity; GO:0005737,cytoplasm; GO:0008299,isoprenoid biosynthetic process; GO:0008152,metabolic process; GO:0016773,phosphotransferase activity, alcohol group as acceptor	2.7.1.36	-	0.15	1	0.11	0.65	-0.043	0.95	-0.039	0.9	1.2	1.4e-11	1	5.6e-09
674	PF01053:Cys/Met metabolism PLP-dependent enzyme	-	-	-	-	-	-	-	TC	GO:0006520,amino acid metabolic process; GO:0030170,pyridoxal phosphate binding	-	-	0.17	1	0.11	0.79	0.95	0.046	-0.062	0.89	2.8	1.6e-23	3.7	1.1e-33
675	-	-	-	-	-	-	-	-	TC	-	-	-	-0.33	0.85	-0.02	0.95	0.02	0.98	0.31	0.26	0.53	0.016	0.57	0.011
676	PF00106:short chain dehydrogenase	-	-	-	S	C21-Steroid hormone metabolism; Androgen and estrogen metabolism	-	-	TC	GO:0008152,metabolic process; GO:0016491,oxidoreductase activity; GO:0003824,catalytic activity; GO:0005488,binding; GO:0003845,11-beta-hydroxysteroid dehydrogenase activity; GO:0033237,11-beta-hydroxysteroid dehydrogenase (NADP+) activity	1.1.1.146	-	0.05	1	0.28	0.32	-0.16	0.78	0.23	0.43	0.046	0.86	-0.39	0.082
677	PF00561:alpha/beta hydrolase fold	-	-	-	-	Sulfur metabolism; Methionine metabolism	-	MER229026	TC	GO:0004414,homoserine O-acetyltransferase activity; GO:0009086,methionine biosynthetic process; GO:0005737,cytoplasm; GO:0016413,O-acetyltransferase activity	2.3.1.31	-	-0.21	1	0.62	0.14	-0.19	0.87	0.83	0.043	2.1	1.4e-10	1.3	8e-05
678	PF07247:Alcohol acetyltransferase	-	-	-	S	-	-	-	TC	-	-	-	0.027	1	-0.19	0.46	-0.047	0.95	-0.21	0.39	1.3	3.7e-11	1.4	1.2e-13
679	-	-	-	-	S	-	-	-	TC	GO:0000287,magnesium ion binding; GO:0016829,lyase activity	-	-	-0.31	0.94	-0.014	0.97	0.47	0.24	0.29	0.35	-1.7	3.4e-14	-1.3	7e-08
680	PF00682:HMGL-like	-	-	-	-	-	-	-	TC	GO:0003824,catalytic activity; GO:0019752,carboxylic acid metabolic process; GO:0046912,transferase activity, transferring acyl groups, acyl groups converted into alkyl on transfer; GO:0004410,homocitrate synthase activity	2.3.3.14	-	-0.33	1	0.53	0.27	0.16	0.9	0.86	0.059	1.7	7e-06	1.3	0.00057
681	-	-	-	-	S	-	-	-	TC	GO:0000287,magnesium ion binding; GO:0016829,lyase activity	-	-	-0.15	1	0.46	0.3	0.1	0.95	0.6	0.15	1.6	3.7e-06	1.3	0.00042
682	PF03871:RNA polymerase Rpb5, N-terminal domain; PF01191:RNA polymerase Rpb5, C-terminal domain	-	-	-	-	RNA polymerase; Purine metabolism; Pyrimidine metabolism	-	-	-	GO:0003677,DNA binding; GO:0003899,DNA-directed RNA polymerase activity; GO:0006350,transcription; GO:0005634,nucleus; GO:0003900,DNA-directed RNA polymerase I activity; GO:0003901,DNA-directed RNA polymerase II activity; GO:0003902,DNA-directed RNA polymerase III activity; GO:0034062,RNA polymerase activity	2.7.7.6	-	-0.2	1	0.5	0.099	-0.19	0.78	0.7	0.018	0.3	0.26	-0.39	0.13
683	PF00400:WD domain, G-beta repeat; PF00400:WD domain, G-beta repeat	-	-	-	-	-	-	MER149485	-	-	-	-	0.084	1	0.3	0.15	0.21	0.54	0.22	0.32	0.25	0.15	0.16	0.37
684	PF13302:Acetyltransferase (GNAT) domain	-	-	-	-	-	-	-	-	GO:0008080,N-acetyltransferase activity; GO:0008152,metabolic process	-	-	-0.29	1	0.56	0.46	-0.26	0.9	0.85	0.23	5.5	4.1e-22	4.7	6.2e-17
685	PF03896:Translocon-associated protein (TRAP), alpha subunit	-	-	-	S	-	-	-	-	-	-	-	0.025	1	0.2	0.28	-0.17	0.59	0.18	0.36	-0.26	0.085	-0.62	1.2e-05
686	-	-	-	-	-	Oxidative phosphorylation; Ubiquinone biosynthesis	3.D.1.6.2	-	-	GO:0008137,NADH dehydrogenase (ubiquinone) activity	1.6.5.3	-	-0.11	1	0.38	0.44	-0.41	0.61	0.49	0.3	-0.14	0.74	-0.93	0.012
687	PF00026:Eukaryotic aspartyl protease	-	-	-	S	-	8.A.32.1.1	MER254816	-	GO:0004194,pepsin A activity; GO:0006508,proteolysis; GO:0004190,aspartic-type endopeptidase activity; GO:0004192,cathepsin D activity	3.4.23.5	-	-0.46	0.94	-2.3	8.5e-10	0.032	0.98	-1.8	1.8e-06	-5.4	2.4e-60	-3.1	1.3e-20
688	PF00069:Protein kinase domain	-	-	-	-	Sphingoglycolipid metabolism; Benzoate degradation via CoA ligation; Starch and sucrose metabolism; Inositol phosphate metabolism; Nicotinate and nicotinamide metabolism	1.A.26.1.1	-	-	GO:0004672,protein kinase activity; GO:0005524,ATP binding; GO:0006468,protein amino acid phosphorylation; GO:0004713,protein-tyrosine kinase activity; GO:0004674,protein serine/threonine kinase activity; GO:0008443,phosphofructokinase activity; GO:0008607,phosphorylase kinase regulator activity; GO:0008819,cobinamide kinase activity; GO:0016307,phosphatidylinositol phosphate kinase activity; GO:…	2.7.1.-	-	0.032	1	-0.45	0.0049	0.26	0.26	-0.48	0.0023	-0.9	7.5e-12	-0.19	0.19
689	PF17772:MYST family zinc finger domain; PF00628:PHD-finger; PF01853:MOZ/SAS family	-	-	-	-	-	-	-	-	GO:0005515,protein binding; GO:0008270,zinc ion binding	-	-	0.087	1	-0.36	0.086	0.17	0.7	-0.45	0.03	0.5	0.0045	1	1.8e-09
690	PF06966:Protein of unknown function (DUF1295)	-	-	-	S	-	-	-	-	GO:0005737,cytoplasm; GO:0006629,lipid metabolic process; GO:0016021,integral to membrane; GO:0016627,oxidoreductase activity, acting on the CH-CH group of donors	-	-	-1.1	0.73	-1.3	0.079	-0.28	0.88	-0.19	0.84	-3	1.5e-07	-2	0.00049
691	-	-	-	-	S	-	-	-	-	GO:0045454,cell redox homeostasis	-	-	-0.043	1	-0.24	0.5	-0.32	0.57	-0.2	0.6	0.06	0.84	-0.022	0.95
692	-	-	-	-	-	-	-	-	-	-	-	-	-0.1	1	-0.05	0.94	-0.17	0.89	0.053	0.94	-0.55	0.14	-0.67	0.08
693	-	-	-	-	-	-	-	-	-	-	-	-	-0.28	0.98	0.33	0.32	-0.24	0.7	0.61	0.049	-0.68	0.008	-1.3	5.9e-07
694	PF00449:Urease alpha-subunit, N-terminal domain; PF00547:Urease, gamma subunit; PF00699:Urease beta subunit; PF01979:Amidohydrolase family	-	-	-	S	Purine metabolism; Atrazine degradation; Urea cycle and metabolism of amino groups	-	MER254818	-	GO:0006807,nitrogen compound metabolic process; GO:0009039,urease activity; GO:0016151,nickel ion binding; GO:0016787,hydrolase activity; GO:0016810,hydrolase activity, acting on carbon-nitrogen (but not peptide) bonds; GO:0019627,urea metabolic process	3.5.1.5	-	0.16	1	-0.032	0.9	-0.11	0.82	-0.19	0.35	1.3	4.4e-17	1.2	2.2e-15
695	-	-	-	-	-	-	-	-	-	-	-	-	-0.29	1	0.41	0.38	0.19	0.85	0.7	0.11	-0.99	0.0027	-1.2	0.00057
696	PF00173:Cytochrome b5-like Heme/Steroid binding domain; PF02770:Acyl-CoA dehydrogenase, middle domain; PF02771:Acyl-CoA dehydrogenase, N-terminal domain; PF00441:Acyl-CoA dehydrogenase, C-terminal domain	-	-	-	-	Valine, leucine and isoleucine degradation; Propanoate metabolism; Fatty acid metabolism; beta-Alanine metabolism	-	-	-	GO:0020037,heme binding; GO:0046914,transition metal ion binding; GO:0003995,acyl-CoA dehydrogenase activity; GO:0006118,electron transport; GO:0016627,oxidoreductase activity, acting on the CH-CH group of donors; GO:0008152,metabolic process	1.3.99.3	-	0.31	0.69	1.1	7.3e-10	0.23	0.49	0.78	2.6e-05	2.1	6.2e-39	1.2	5.2e-14
697	-	-	-	-	-	-	-	-	-	GO:0003676,nucleic acid binding	-	-	0.21	0.94	0.023	0.93	0.27	0.36	-0.19	0.36	0.33	0.043	0.57	0.00033
698	PF08243:SPT2 chromatin protein	-	-	-	S	-	-	-	-	-	-	-	0.0077	1	-0.21	0.28	0.24	0.39	-0.22	0.26	-0.61	3.5e-05	-0.16	0.32
699	PF00149:Calcineurin-like phosphoesterase; PF07690:Major Facilitator Superfamily	-	-	-	S	-	-	-	-	GO:0016787,hydrolase activity; GO:0005215,transporter activity; GO:0006810,transport; GO:0016021,integral to membrane	-	-	-0.11	1	0.56	0.18	-0.67	0.22	0.67	0.1	-0.73	0.032	-2	1.7e-09
700	PF11160:Hypervirulence associated proteins TUDOR domain	-	-	-	-	-	-	-	-	-	-	-	-1.2	0.56	-0.092	0.93	-0.063	0.98	1.1	0.12	-1.2	0.043	-1.2	0.053
701	PF08219:Outer membrane protein TOM13	-	-	-	-	-	-	-	-	GO:0005741,mitochondrial outer membrane; GO:0006810,transport	-	-	-0.26	0.9	0.093	0.74	-0.25	0.52	0.36	0.12	-0.068	0.75	-0.41	0.034
702	PF08616:Stabilization of polarity axis	-	-	-	-	-	-	-	-	-	-	-	-0.35	0.73	-0.33	0.18	0.93	7.5e-05	0.023	0.95	-0.9	1.8e-06	0.36	0.083
703	-	-	-	-	-	-	-	-	-	-	-	-	-0.28	1	-0.37	0.38	0.56	0.32	-0.096	0.86	-0.86	0.0063	0.068	0.86
704	-	-	-	-	-	-	-	-	-	-	-	-	-0.51	-	-0.18	-	0.2	-	0.32	0.81	-0.53	0.58	-0.14	0.89
705	-	-	-	-	-	-	-	-	-	-	-	-	-0.078	1	-0.81	0.0061	-0.5	0.27	-0.74	0.013	-0.1	0.74	0.21	0.44
706	-	-	-	-	-	-	-	-	-	-	-	-	-0.47	-	-0.57	0.49	-0.4	-	-0.1	0.93	-2.5	1.4e-06	-2.4	4.1e-06
707	-	-	-	-	-	-	-	-	-	-	-	-	0.39	-	0.57	-	0.91	-	0.18	0.89	-4.9	1.7e-06	-4.5	7.3e-06
708	PF05794:T-complex protein 11	-	-	-	-	-	-	-	-	-	-	-	-0.25	1	-0.48	0.17	0.28	0.66	-0.23	0.55	-0.76	0.0059	0.00032	1
709	-	-	-	-	-	-	-	-	-	-	-	-	-0.23	1	-0.28	0.43	0.41	0.38	-0.055	0.9	-1.4	8.8e-09	-0.75	0.0042
710	PF00067:Cytochrome P450	-	CYP62	-	S	Tryptophan metabolism; Fatty acid metabolism; gamma-Hexachlorocyclohexane degradation	-	-	-	GO:0004497,monooxygenase activity; GO:0005506,iron ion binding; GO:0006118,electron transport; GO:0020037,heme binding; GO:0050381,unspecific monooxygenase activity	1.14.14.1	-	-0.42	0.81	-0.83	0.0055	-0.32	0.53	-0.41	0.2	-2.1	5.7e-19	-1.6	1.3e-11
711	PF05653:Magnesium transporter NIPA; PF05653:Magnesium transporter NIPA	-	-	-	S	-	-	-	-	-	-	-	0.17	1	0.33	0.17	0.12	0.82	0.15	0.56	-0.5	0.0068	-0.71	0.00014
712	-	-	-	-	S	-	-	-	-	-	-	-	-0.24	0.9	0.45	0.03	0.057	0.93	0.68	0.00038	0.032	0.87	-0.36	0.042
713	PF09724:Sister chromatid cohesion protein Dcc1	-	-	-	-	-	-	-	-	-	-	-	-0.31	0.59	-0.011	0.97	-0.092	0.85	0.3	0.13	-0.37	0.023	-0.45	0.0064
714	PF01545:Cation efflux family	-	-	-	S	-	-	-	-	GO:0006812,cation transport; GO:0008324,cation transmembrane transporter activity; GO:0016020,membrane	-	-	-0.027	1	-0.34	0.04	-0.23	0.41	-0.31	0.059	0.79	1.2e-08	0.9	3.2e-11
715	PF00465:Iron-containing alcohol dehydrogenase	-	-	-	-	Bile acid biosynthesis; Tyrosine metabolism; Glycerolipid metabolism; Glycolysis / Gluconeogenesis; Fatty acid metabolism	-	-	-	GO:0008152,metabolic process; GO:0016491,oxidoreductase activity; GO:0046872,metal ion binding; GO:0004022,alcohol dehydrogenase activity; GO:0004023,alcohol dehydrogenase activity, metal ion-independent; GO:0004024,alcohol dehydrogenase activity, zinc-dependent; GO:0004025,alcohol dehydrogenase activity, iron-dependent	1.1.1.1	-	0.53	0.5	-0.22	0.51	-0.54	0.16	-0.75	0.0098	0.74	0.0026	0.41	0.11
716	-	-	-	-	S	-	-	-	-	-	-	-	0.82	0.88	0.16	0.85	-1.1	0.19	-0.66	0.36	2.3	1.4e-05	1	0.072
717	PF04082:Fungal specific transcription factor domain	TF	-	-	S	-	-	-	-	GO:0003677,DNA binding; GO:0005634,nucleus; GO:0006350,transcription; GO:0008270,zinc ion binding	-	-	0.25	1	0.21	0.58	-0.064	0.95	-0.047	0.92	0.76	0.0044	0.49	0.076
718	-	-	-	-	-	-	-	-	-	-	-	-	-0.15	-	-0.024	0.97	0.99	-	0.12	0.9	1.7	0.0091	2.7	0.00034
719	PF01613:Flavin reductase like domain	-	-	-	-	-	-	-	-	-	-	-	-0.27	1	0.44	0.25	-0.76	0.049	0.71	0.053	-5.8	5.6e-103	-7	1.4e-137
720	PF01369:Sec7 domain	-	-	-	-	-	-	-	-	GO:0005086,ARF guanyl-nucleotide exchange factor activity; GO:0005622,intracellular; GO:0032012,regulation of ARF protein signal transduction	-	-	0.07	1	-0.25	0.3	0.25	0.51	-0.32	0.16	-0.31	0.1	0.19	0.35
721	-	-	-	-	S	-	-	-	-	-	-	-	-0.43	-	0.63	0.36	-0.052	-	1.1	0.097	-1.7	0.00012	-2.3	4.2e-06
722	PF06747:CHCH domain	-	-	-	S	-	-	-	-	-	-	-	-0.18	1	0.94	0.015	-0.08	0.95	1.1	0.0033	1.5	2e-06	0.5	0.14
723	PF00753:Metallo-beta-lactamase superfamily	-	-	-	-	-	-	-	-	GO:0008270,zinc ion binding; GO:0008800,beta-lactamase activity; GO:0017001,antibiotic catabolic process; GO:0016787,hydrolase activity	-	-	0.16	1	-0.57	0.083	-0.22	0.74	-0.73	0.022	-0.72	0.0069	-0.38	0.18
724	-	-	-	-	S	-	-	-	-	-	-	-	-0.15	0.98	-0.47	0.0035	-0.32	0.13	-0.32	0.057	-0.93	3e-12	-0.78	6.5e-09
725	PF00702:haloacid dehalogenase-like hydrolase; PF12352:Snare region anchored in the vesicle membrane C-terminus; PF00702:haloacid dehalogenase-like hydrolase; PF12409:P5-type ATPase cation transporter; PF00122:E1-E2 ATPase	-	-	-	-	-	3.A.3.14.1	-	-	GO:0008152,metabolic process; GO:0016787,hydrolase activity; GO:0003676,nucleic acid binding; GO:0005524,ATP binding; GO:0008026,ATP-dependent helicase activity; GO:0006810,transport; GO:0015662,ATPase activity, coupled to transmembrane movement of ions, phosphorylative mechanism; GO:0016020,membrane; GO:0003824,catalytic activity; GO:0006812,cation transport; GO:0016021,integral to membrane; GO:…	3.6.3.-	-	0.028	1	0.024	0.92	0.034	0.95	-0.0034	0.99	0.0029	0.99	0.013	0.95
726	PF10294:Lysine methyltransferase	-	-	-	S	-	-	-	-	-	-	-	-0.0052	1	0.14	0.59	-0.043	0.95	0.14	0.58	-0.82	3e-06	-1	2.1e-08
727	PF09805:Nucleolar protein 12 (25kDa)	-	-	-	-	-	-	-	-	-	-	-	-0.15	1	0.44	0.029	0.22	0.56	0.59	0.0024	0.67	6.5e-05	0.45	0.012
728	PF03169:OPT oligopeptide transporter protein	-	-	-	-	-	2.A.67.1.1	-	-	-	-	-	-0.11	1	0.18	0.75	-0.5	0.47	0.29	0.59	-4.9	1.4e-44	-5.6	9.7e-54
729	PF00753:Metallo-beta-lactamase superfamily	-	-	-	-	-	-	-	-	GO:0016787,hydrolase activity	-	-	-0.74	0.37	-1.1	0.0019	-0.75	0.23	-0.38	0.35	2.2	5e-10	2.5	1.8e-15
730	-	-	-	-	-	-	-	-	-	-	-	-	1	-	1.3	-	0	-	0.23	0.9	4	0.00033	2.8	0.0074
731	-	-	-	-	-	-	-	-	-	-	-	-	0	-	0	-	0.11	-	0	1	-2.4	0.055	-2	0.12
732	-	-	-	-	-	-	-	-	-	GO:0003676,nucleic acid binding; GO:0005622,intracellular; GO:0008270,zinc ion binding	-	-	-0.24	-	0.36	-	-0.15	-	0.6	0.55	2	0.014	1.5	0.064
733	-	-	-	-	-	-	-	-	-	-	-	-	0.39	-	0.69	0.28	-0.25	-	0.3	0.69	0.78	0.14	-0.16	0.8
734	-	-	-	-	-	-	-	-	-	-	-	-	-	-	-	-	-	-	-	-	-	-	-	-
735	-	-	-	-	S	-	-	-	-	-	-	-	-	-	-	-	-	-	-	-	-	-	-	-
736	PF02852:Pyridine nucleotide-disulphide oxidoreductase, dimerisation domain; PF07992:Pyridine nucleotide-disulphide oxidoreductase	-	-	-	S	-	-	-	-	GO:0016491,oxidoreductase activity; GO:0050660,FAD binding; GO:0006118,electron transport; GO:0005737,cytoplasm; GO:0045454,cell redox homeostasis; GO:0004362,glutathione-disulfide reductase activity; GO:0006749,glutathione metabolic process; GO:0050661,NADP binding	1.8.1.7	-	0.2	0.89	-0.34	0.032	-0.21	0.43	-0.54	0.00033	1.8	1.8e-43	1.9	8e-51
737	-	-	-	-	-	-	-	-	-	-	-	-	-0.14	1	-0.72	0.061	0.18	0.86	-0.57	0.14	1.5	1.6e-06	2.4	5.4e-15
738	-	-	-	-	-	-	-	-	-	-	-	-	-0.54	-	-0.95	-	0.75	-	-0.41	0.64	-0.51	0.47	1.2	0.088
739	PF01636:Phosphotransferase enzyme family	-	-	-	-	-	-	-	-	GO:0004713,protein-tyrosine kinase activity; GO:0005524,ATP binding; GO:0006468,protein amino acid phosphorylation	-	-	0.66	-	0.069	0.92	0.33	-	-0.59	0.23	2.4	5.5e-06	2.7	1.4e-06
740	-	-	-	-	S	-	-	-	-	-	-	-	-0.36	-	-0.33	-	-0.75	-	0.024	0.99	-0.35	0.79	-0.77	0.58
741	PF00350:Dynamin family; PF02212:Dynamin GTPase effector domain; PF01031:Dynamin central region	-	-	-	-	-	-	-	-	GO:0005525,GTP binding; GO:0003924,GTPase activity; GO:0008549,dynamin GTPase activity	3.6.5.5	-	-0.0075	1	0.019	0.92	0.45	0.002	0.026	0.89	-0.26	0.025	0.17	0.15
742	PF07470:Glycosyl Hydrolase Family 88	-	-	GH88	S	-	-	-	-	GO:0003824,catalytic activity	-	-	0.17	1	-0.3	0.57	-0.4	0.65	-0.47	0.35	-0.74	0.058	-0.83	0.033
743	PF02136:Nuclear transport factor 2 (NTF2) domain	-	-	-	-	-	-	-	-	GO:0005622,intracellular; GO:0006810,transport	-	-	-0.26	0.94	0.2	0.46	-0.29	0.47	0.46	0.062	-0.42	0.041	-0.91	4.8e-06
744	-	-	-	-	-	-	-	-	-	-	-	-	-0.078	1	-0.13	0.73	-0.0043	1	-0.054	0.9	0.18	0.53	0.31	0.27
745	-	-	-	-	-	-	-	-	-	-	-	-	0.13	1	0.33	0.077	-0.26	0.31	0.2	0.31	-0.09	0.58	-0.68	4.9e-06
746	PF00352:Transcription factor TFIID (or TATA-binding protein, TBP); PF00352:Transcription factor TFIID (or TATA-binding protein, TBP)	TF	-	-	-	-	-	-	-	GO:0003677,DNA binding; GO:0003702,RNA polymerase II transcription factor activity; GO:0005634,nucleus; GO:0005669,transcription factor TFIID complex; GO:0006355,regulation of transcription, DNA-dependent; GO:0006367,transcription initiation from RNA polymerase II promoter	-	-	-0.17	1	0.16	0.52	0.19	0.63	0.33	0.13	-1.4	1.9e-16	-1.4	1.3e-15
747	PF00364:Biotin-requiring enzyme; PF02817:e3 binding domain	-	-	-	-	Glycolysis / Gluconeogenesis; Pyruvate metabolism	-	-	-	GO:0005515,protein binding; GO:0008152,metabolic process; GO:0008415,acyltransferase activity; GO:0004742,dihydrolipoyllysine-residue acetyltransferase activity; GO:0009351,dihydrolipoamide S-acyltransferase complex; GO:0030523,dihydrolipoamide S-acyltransferase activity	2.3.1.12	-	-0.28	0.98	-0.0027	1	-0.054	0.96	0.28	0.41	-0.6	0.02	-0.65	0.012
748	PF12349:Sterol-sensing domain of SREBP cleavage-activation	-	-	-	-	-	-	-	-	GO:0016021,integral to membrane	-	-	0.18	0.98	-0.081	0.74	-0.23	0.5	-0.26	0.2	1.1	1.6e-11	0.95	6e-09
749	-	-	-	-	S	-	-	-	-	-	-	-	0.035	1	-0.55	0.38	-0.29	0.84	-0.58	0.35	-0.18	0.74	0.076	0.9
750	PF00491:Arginase family	-	-	-	S	Arginine and proline metabolism	-	-	-	GO:0004053,arginase activity; GO:0006527,arginine catabolic process; GO:0016813,hydrolase activity, acting on carbon-nitrogen (but not peptide) bonds, in linear amidines; GO:0046872,metal ion binding; GO:0008783,agmatinase activity	3.5.3.11	-	0.11	1	0.42	0.22	0.0035	1	0.31	0.38	-2.7	5.9e-29	-3.1	2.4e-35
751	PF12054:Domain of unknown function (DUF3535); PF00176:SNF2 family N-terminal domain; PF00271:Helicase conserved C-terminal domain	-	-	-	-	Purine metabolism	-	-	-	GO:0003677,DNA binding; GO:0005524,ATP binding; GO:0003676,nucleic acid binding; GO:0004386,helicase activity; GO:0005488,binding; GO:0004003,ATP-dependent DNA helicase activity; GO:0004004,ATP-dependent RNA helicase activity; GO:0008026,ATP-dependent helicase activity; GO:0008094,DNA-dependent ATPase activity; GO:0008186,RNA-dependent ATPase activity; GO:0015462,protein-transmembrane transportin…	3.6.1.3	-	0.28	0.93	0.14	0.62	0.38	0.29	-0.14	0.64	0.91	7.3e-06	1.1	1.3e-08
752	PF13621:Cupin-like domain	-	-	-	S	-	-	-	-	-	-	-	-0.24	0.99	-0.08	0.83	0.2	0.75	0.16	0.62	-0.058	0.83	0.22	0.4
753	PF00566:Rab-GTPase-TBC domain	-	-	-	S	-	-	-	-	GO:0005097,Rab GTPase activator activity; GO:0005622,intracellular; GO:0032313,regulation of Rab GTPase activity	-	-	-0.18	0.98	-0.55	0.0036	-0.029	0.97	-0.37	0.056	0.22	0.2	0.74	4.1e-06
754	PF02910:Fumarate reductase flavoprotein C-term; PF00890:FAD binding domain	-	-	-	S	Citrate cycle (TCA cycle); Oxidative phosphorylation	5.A.4.1.1	-	-	GO:0006118,electron transport; GO:0016491,oxidoreductase activity; GO:0006099,tricarboxylic acid cycle; GO:0016627,oxidoreductase activity, acting on the CH-CH group of donors; GO:0050660,FAD binding; GO:0008177,succinate dehydrogenase (ubiquinone) activity	1.3.5.1	-	0.25	0.9	0.28	0.2	0.16	0.71	0.035	0.91	0.95	2.3e-08	0.83	1.2e-06
755	PF01585:G-patch domain	-	-	-	-	Tryptophan metabolism; Ubiquinone biosynthesis	-	-	-	GO:0003676,nucleic acid binding; GO:0005622,intracellular; GO:0008766,UDP-N-acetylmuramoylalanyl-D-glutamyl-2,6-diaminopimelate-D-alanyl-D-alanine ligase activity; GO:0018169,ribosomal S6-glutamic acid ligase activity; GO:0043773,coenzyme F420-0 gamma-glutamyl ligase activity; GO:0043774,coenzyme F420-2 alpha-glutamyl ligase activity	6.3.2.-	-	0.11	1	0.016	0.96	0.24	0.52	-0.093	0.72	0.59	0.00077	0.82	3.4e-06
756	PF00067:Cytochrome P450	-	CYP50	-	S	Tryptophan metabolism; Fatty acid metabolism; gamma-Hexachlorocyclohexane degradation	-	-	-	GO:0004497,monooxygenase activity; GO:0005506,iron ion binding; GO:0006118,electron transport; GO:0020037,heme binding; GO:0050381,unspecific monooxygenase activity	1.14.14.1	-	0.72	0.32	0.68	0.055	-0.023	0.98	-0.039	0.94	1.3	4.2e-06	0.62	0.04
757	PF03556:Cullin binding	-	-	-	-	-	-	-	-	-	-	-	-0.13	1	-0.36	0.18	-0.27	0.54	-0.23	0.42	-0.13	0.57	-0.051	0.84
758	-	-	-	-	-	-	-	-	-	-	-	-	0.12	1	-2.6	7.3e-10	-0.1	0.95	-2.7	1.1e-10	-3.3	1.3e-18	-0.85	0.033
759	PF01883:Iron-sulfur cluster assembly protein	-	-	-	-	-	-	-	-	-	-	-	-0.23	0.98	-0.007	0.99	-0.26	0.57	0.23	0.41	0.65	0.002	0.4	0.067
760	-	-	-	-	-	-	-	-	-	-	-	-	1.3	0.16	0.19	0.78	-0.91	0.23	-1.1	0.041	-2.3	2.6e-07	-3.4	1.2e-14
761	PF13423:Ubiquitin carboxyl-terminal hydrolase; PF00929:Exonuclease	-	-	-	-	-	-	-	-	GO:0004221,ubiquitin thiolesterase activity; GO:0006511,ubiquitin-dependent protein catabolic process; GO:0004527,exonuclease activity; GO:0005622,intracellular; GO:0003676,nucleic acid binding; GO:0004535,poly(A)-specific ribonuclease activity	3.1.13.4	-	0.2	0.95	0.15	0.5	0.1	0.85	-0.055	0.84	1.1	1.2e-11	1	1.2e-10
762	PF04000:Sas10/Utp3/C1D family	-	-	-	-	-	-	-	-	-	-	-	-0.17	1	0.62	0.13	0.16	0.88	0.79	0.048	1	0.0015	0.59	0.089
763	PF00561:alpha/beta hydrolase fold	-	-	-	-	-	-	MER254742	-	GO:0004177,aminopeptidase activity; GO:0006508,proteolysis; GO:0016787,hydrolase activity; GO:0005737,cytoplasm; GO:0016804,prolyl aminopeptidase activity	-	-	0.012	1	-0.75	0.0075	-0.17	0.82	-0.76	0.0065	1.6	1.1e-10	2.1	1.2e-19
764	-	-	-	-	S	Starch and sucrose metabolism	-	-	-	GO:0004339,glucan 1,4-alpha-glucosidase activity	3.2.1.3	-	-0.11	1	-1.4	0.0099	-0.14	0.94	-1.3	0.018	-2.7	1.5e-09	-1.4	0.0017
765	PF01984:Double-stranded DNA-binding domain	-	-	-	-	-	-	-	-	GO:0003677,DNA binding	-	-	-0.043	1	-0.41	0.045	-0.31	0.28	-0.37	0.072	-0.048	0.81	0.047	0.81
766	PF14570:RING/Ubox like zinc-binding domain	-	-	-	S	-	-	-	-	GO:0003676,nucleic acid binding; GO:0005515,protein binding; GO:0008270,zinc ion binding	-	-	0.38	0.88	-0.32	0.31	0.16	0.84	-0.7	0.018	1.7	5e-12	2.2	4.5e-19
767	-	-	-	-	-	-	-	-	-	-	-	-	0.31	0.95	-0.21	0.54	0.26	0.74	-0.52	0.089	1.2	1.6e-05	1.6	1.9e-09
768	-	-	-	-	S	-	-	-	-	-	-	-	0.19	1	-0.36	0.59	-0.31	-	-0.55	0.39	-0.24	0.66	-0.19	0.74
769	PF00097:Zinc finger, C3HC4 type (RING finger)	-	-	-	-	-	-	-	-	GO:0005515,protein binding; GO:0008270,zinc ion binding; GO:0003677,DNA binding; GO:0006281,DNA repair	-	-	0.089	1	1.2	0.0045	-0.4	0.65	1.2	0.009	1.3	0.00031	-0.3	0.48
770	PF13867:Sin3 binding region of histone deacetylase complex subunit SAP30	-	-	-	-	-	-	-	-	-	-	-	-0.096	1	-0.1	0.71	-0.46	0.087	-0.0056	0.99	-0.5	0.0065	-0.86	1.8e-06
771	-	-	-	-	-	-	-	-	-	-	-	-	-0.27	1	-2.2	8.5e-05	0.022	0.99	-2	0.00064	-2.2	1.4e-05	0.091	0.88
772	PF08238:Sel1 repeat; PF08238:Sel1 repeat; PF08238:Sel1 repeat	-	-	-	-	-	-	-	-	-	-	-	-0.12	1	-0.27	0.12	0.2	0.48	-0.16	0.4	-0.4	0.004	0.068	0.68
773	PF01161:Phosphatidylethanolamine-binding protein	-	-	-	-	-	-	-	-	-	-	-	-0.23	1	0.53	0.075	0.017	0.99	0.76	0.0085	0.87	0.00033	0.36	0.17
774	PF01751:Toprim domain; PF00204:DNA gyrase B; PF00521:DNA gyrase/topoisomerase IV, subunit A; PF02518:Histidine kinase-, DNA gyrase B-, and HSP90-like ATPase; PF16898:C-terminal associated domain of TOPRIM	-	-	-	-	-	-	-	-	GO:0003677,DNA binding; GO:0003918,DNA topoisomerase (ATP-hydrolyzing) activity; GO:0005524,ATP binding; GO:0005694,chromosome; GO:0006265,DNA topological change; GO:0006259,DNA metabolic process	5.99.1.3	-	0.2	1	1.3	0.0029	0.79	0.19	1.1	0.014	1.1	0.0022	0.63	0.1
775	-	-	-	-	-	-	-	-	-	-	-	-	-	-	-	-	-	-	-	-	-	-	-	-
776	PF04707:PRELI-like family	-	-	-	-	-	-	-	-	GO:0005529,sugar binding	-	-	-0.14	1	-0.56	0.071	-0.75	0.03	-0.42	0.19	-0.45	0.085	-0.64	0.012
777	PF12706:Beta-lactamase superfamily domain; PF12706:Beta-lactamase superfamily domain	-	-	-	-	-	-	-	-	GO:0016787,hydrolase activity; GO:0003700,transcription factor activity; GO:0005634,nucleus; GO:0006355,regulation of transcription, DNA-dependent; GO:0043565,sequence-specific DNA binding; GO:0046983,protein dimerization activity	-	-	-0.0047	1	0.21	0.35	0.35	0.21	0.22	0.34	-1.3	5.5e-16	-1.2	6.3e-13
778	PF01926:50S ribosome-binding GTPase; PF02824:TGS domain; PF16897:C-terminal region of MMR_HSR1 domain	-	-	-	-	-	-	-	-	GO:0005525,GTP binding; GO:0005622,intracellular	-	-	0.029	1	-0.27	0.16	0.021	0.97	-0.3	0.11	-0.46	0.0027	-0.17	0.32
779	PF00069:Protein kinase domain	-	-	-	-	Sphingoglycolipid metabolism; Benzoate degradation via CoA ligation; Starch and sucrose metabolism; Inositol phosphate metabolism; Nicotinate and nicotinamide metabolism	-	-	-	GO:0004672,protein kinase activity; GO:0005524,ATP binding; GO:0006468,protein amino acid phosphorylation; GO:0004713,protein-tyrosine kinase activity; GO:0004674,protein serine/threonine kinase activity; GO:0008443,phosphofructokinase activity; GO:0008607,phosphorylase kinase regulator activity; GO:0008819,cobinamide kinase activity; GO:0016307,phosphatidylinositol phosphate kinase activity; GO:…	2.7.1.-	-	0.098	1	-0.25	0.16	0.32	0.17	-0.35	0.044	0.19	0.21	0.76	9.5e-08
780	PF03055:Retinal pigment epithelial membrane protein	-	-	-	-	-	-	-	-	-	-	-	0.0077	1	-0.023	0.9	-0.097	0.74	-0.031	0.87	-0.98	6.1e-19	-1	9.6e-22
781	PF07690:Major Facilitator Superfamily	-	-	-	S	-	2.A.1.3.35	-	-	GO:0015520,tetracycline:hydrogen antiporter activity; GO:0015904,tetracycline transport; GO:0016021,integral to membrane; GO:0046677,response to antibiotic; GO:0005215,transporter activity; GO:0006810,transport	-	-	-0.0089	1	0.53	0.016	0.32	0.31	0.53	0.014	-1.6	1.8e-19	-1.8	3.5e-24
782	PF04182:B-block binding subunit of TFIIIC; PF04707:PRELI-like family	-	-	-	-	-	-	-	-	-	-	-	0.086	1	0.38	0.066	0.15	0.72	0.3	0.16	-0.74	8.5e-06	-0.97	4.3e-09
783	PF06472:ABC transporter transmembrane region 2; PF00005:ABC transporter	-	-	-	S	-	3.A.1.203.7	-	-	GO:0005524,ATP binding; GO:0016887,ATPase activity; GO:0000166,nucleotide binding; GO:0017111,nucleoside-triphosphatase activity; GO:0006810,transport; GO:0016020,membrane	-	-	0.17	1	0.2	0.34	0.3	0.3	0.037	0.89	0.35	0.034	0.45	0.0072
784	PF06941:5' nucleotidase, deoxy (Pyrimidine), cytosolic type C protein (NT5C)	-	-	-	-	-	-	-	-	-	-	-	-0.3	0.95	-0.12	0.74	-0.055	0.95	0.18	0.59	-0.23	0.37	-0.17	0.52
785	-	-	-	-	-	-	-	-	-	-	-	-	-0.074	1	-0.24	0.63	1.1	0.24	-0.16	0.76	1.8	2.4e-05	3.1	3.1e-10
786	PF04437:RINT-1 / TIP-1 family	-	-	-	-	-	-	-	-	GO:0005215,transporter activity; GO:0005488,binding; GO:0006810,transport	-	-	0.083	1	0.097	0.63	-0.062	0.91	0.015	0.96	0.7	1.2e-06	0.54	0.00023
787	PF17855:MCM AAA-lid domain; PF14551:MCM N-terminal domain; PF00493:MCM P-loop domain; PF17207:MCM OB domain	-	-	-	-	Purine metabolism	-	-	-	GO:0003677,DNA binding; GO:0005524,ATP binding; GO:0006270,DNA replication initiation; GO:0008094,DNA-dependent ATPase activity; GO:0000166,nucleotide binding; GO:0017111,nucleoside-triphosphatase activity; GO:0005634,nucleus; GO:0004003,ATP-dependent DNA helicase activity; GO:0004004,ATP-dependent RNA helicase activity; GO:0008026,ATP-dependent helicase activity; GO:0008186,RNA-dependent ATPase …	3.6.1.3	-	0.054	1	0.69	0.0035	0.27	0.52	0.63	0.0077	0.9	5.3e-06	0.49	0.02
788	-	-	-	-	-	-	-	-	-	-	-	-	0.43	0.81	0.47	0.15	-0.66	0.088	0.037	0.94	1.5	3.5e-09	0.36	0.18
789	PF00400:WD domain, G-beta repeat; PF00400:WD domain, G-beta repeat; PF00400:WD domain, G-beta repeat	-	-	-	-	-	-	-	-	-	-	-	-0.099	1	0.076	0.73	0.19	0.57	0.18	0.37	0.43	0.0048	0.54	0.0004
790	-	-	-	-	-	-	-	-	-	-	-	-	-0.43	0.84	-1	0.0007	-0.63	0.11	-0.59	0.062	-3.7	4e-50	-3.3	2.3e-40
791	PF13921:Myb-like DNA-binding domain	-	-	-	-	-	-	-	-	GO:0003677,DNA binding; GO:0003676,nucleic acid binding; GO:0005622,intracellular; GO:0008270,zinc ion binding	-	-	0.17	1	-0.1	0.79	0.44	0.37	-0.27	0.41	0.97	0.00012	1.5	1.9e-09
792	PF00153:Mitochondrial carrier protein	-	-	-	S	-	-	-	-	GO:0005488,binding; GO:0006810,transport; GO:0016020,membrane	-	-	-0.053	1	0.12	0.38	0.14	0.56	0.18	0.18	0.24	0.026	0.25	0.022
793	PF08317:Spc7 kinetochore protein	-	-	-	-	-	-	-	-	GO:0005509,calcium ion binding	-	-	0.044	1	0.11	0.64	0.068	0.91	0.064	0.8	0.27	0.12	0.23	0.2
794	PF00225:Kinesin motor domain	-	-	-	-	-	-	-	-	GO:0003777,microtubule motor activity; GO:0005524,ATP binding; GO:0005875,microtubule associated complex; GO:0007018,microtubule-based movement; GO:0008574,plus-end-directed microtubule motor activity	3.6.4.4	-	0.074	1	1.1	0.048	-0.19	0.91	1	0.064	1	0.03	-0.29	0.58
795	PF00168:C2 domain	-	-	-	-	-	-	-	-	-	-	-	-0.13	1	0.092	0.84	0.059	0.96	0.23	0.59	-0.45	0.14	-0.48	0.12
796	PF00168:C2 domain; PF00168:C2 domain; PF00168:C2 domain; PF00168:C2 domain	-	-	-	-	-	-	-	-	-	-	-	0.038	1	0.044	0.92	0.88	0.025	0.0062	0.99	1.5	3.8e-08	2.4	9.1e-18
797	PF00106:short chain dehydrogenase	-	-	-	-	-	-	-	-	GO:0008152,metabolic process; GO:0016491,oxidoreductase activity; GO:0003824,catalytic activity; GO:0005488,binding	-	-	0.34	1	-2.4	0.004	-0.04	0.99	-2.7	0.00073	-1.9	0.0051	0.36	0.65
798	-	-	-	-	S	RNA polymerase; Purine metabolism; Pyrimidine metabolism	-	-	-	GO:0003899,DNA-directed RNA polymerase activity; GO:0003900,DNA-directed RNA polymerase I activity; GO:0003901,DNA-directed RNA polymerase II activity; GO:0003902,DNA-directed RNA polymerase III activity; GO:0034062,RNA polymerase activity	2.7.7.6	-	0.071	1	-0.057	0.75	0.013	0.98	-0.13	0.43	-0.17	0.19	-0.096	0.48
799	PF04922:DIE2/ALG10 family	-	-	GT59	S	O-Glycans biosynthesis; Fructose and mannose metabolism; Peptidoglycan biosynthesis; Sphingoglycolipid metabolism; Blood group glycolipid biosynthesis - lact series; Blood group glycolipid biosynthesis - neolact series; Glycerolipid metabolism; Globoside metabolism; Chondroitin / heparan sulfate biosynthesis; Keratan sulfate biosynthesis; N-Glycans biosynthesis	-	-	-	GO:0000009,alpha-1,6-mannosyltransferase activity; GO:0000026,alpha-1,2-mannosyltransferase activity; GO:0000030,mannosyltransferase activity; GO:0000033,alpha-1,3-mannosyltransferase activity; GO:0001962,alpha-1,3-galactosyltransferase activity; GO:0003980,UDP-glucose:glycoprotein glucosyltransferase activity; GO:0004376,glycolipid mannosyltransferase activity; GO:0004576,oligosaccharyl transfer…	2.4.1.-	-	-0.23	0.97	-0.29	0.24	-0.24	0.54	-0.061	0.85	-0.6	0.0018	-0.55	0.0042
800	-	-	-	-	-	-	-	-	-	GO:0009007,site-specific DNA-methyltransferase (adenine-specific) activity	2.1.1.72	-	-0.14	1	0.044	0.91	-0.14	0.87	0.18	0.61	0.64	0.014	0.45	0.091
801	PF02668:Taurine catabolism dioxygenase TauD, TfdA family	-	-	-	-	-	-	-	-	GO:0006118,electron transport; GO:0016491,oxidoreductase activity; GO:0043738,F420H2 dehydrogenase activity; GO:0043826,sulfur oxygenase reductase activity; GO:0043883,malolactic enzyme activity; GO:0051341,regulation of oxidoreductase activity	1.-.-.-	-	-0.32	1	-0.96	0.0095	-0.58	0.27	-0.64	0.09	-2	5.3e-11	-1.6	1.3e-07
802	PF03169:OPT oligopeptide transporter protein	-	-	-	-	-	2.A.67.1.2	-	-	GO:0016020,membrane	-	-	-0.12	1	-3.2	3e-07	-0.25	0.9	-3.1	9.7e-07	-3.2	2e-08	-0.21	0.76
803	PF00400:WD domain, G-beta repeat; PF08606:Prp19/Pso4-like; PF12894:Anaphase-promoting complex subunit 4 WD40 domain; PF04564:U-box domain	-	-	-	-	-	-	-	-	GO:0000151,ubiquitin ligase complex; GO:0004842,ubiquitin-protein ligase activity; GO:0016567,protein ubiquitination	-	-	-0.053	1	0.37	0.16	0.37	0.34	0.42	0.1	1	1.4e-06	1	1.7e-06
804	PF07719:Tetratricopeptide repeat; PF13414:TPR repeat; PF16546:Homodimerisation domain of SGTA	-	-	-	-	-	-	-	-	GO:0004721,phosphoprotein phosphatase activity; GO:0004723,calcium-dependent protein serine/threonine phosphatase activity; GO:0004724,magnesium-dependent protein serine/threonine phosphatase activity; GO:0005963,magnesium-dependent protein serine/threonine phosphatase complex; GO:0008420,CTD phosphatase activity; GO:0008597,calcium-dependent protein serine/threonine phosphatase regulator activit…	3.1.3.16	-	-0.17	1	0.13	0.61	0.07	0.91	0.3	0.18	1.1	2.4e-09	0.99	2e-08
805	PF00293:NUDIX domain	-	-	-	S	-	-	-	-	GO:0016787,hydrolase activity	-	-	-0.32	0.67	-0.17	0.45	0.61	0.0073	0.15	0.52	-0.021	0.92	0.76	7.3e-06
806	PF00069:Protein kinase domain	-	-	-	-	-	-	-	-	GO:0016853,isomerase activity; GO:0004672,protein kinase activity; GO:0005524,ATP binding; GO:0006468,protein amino acid phosphorylation; GO:0004713,protein-tyrosine kinase activity; GO:0004674,protein serine/threonine kinase activity; GO:0004675,transmembrane receptor protein serine/threonine kinase activity; GO:0004676,3-phosphoinositide-dependent protein kinase activity; GO:0004677,DNA-depende…	2.7.11.-	-	-0.19	1	-0.02	0.96	0.23	0.72	0.17	0.62	0.64	0.011	0.89	0.00041
807	PF00098:Zinc knuckle; PF00076:RNA recognition motif. (a.k.a. RRM, RBD, or RNP domain)	-	-	-	S	-	-	-	-	GO:0003676,nucleic acid binding; GO:0008270,zinc ion binding	-	-	-0.15	1	0.34	0.063	0.37	0.1	0.49	0.0053	-0.0016	1	0.03	0.87
808	PF00069:Protein kinase domain; PF00069:Protein kinase domain	-	-	-	-	-	-	-	-	GO:0004672,protein kinase activity; GO:0005524,ATP binding; GO:0006468,protein amino acid phosphorylation; GO:0004674,protein serine/threonine kinase activity	2.7.1.37	-	-0.058	1	0.1	0.84	0.17	0.87	0.16	0.75	-1.8	5.3e-09	-1.7	2.2e-08
809	PF02921:Ubiquinol cytochrome reductase transmembrane region; PF00355:Rieske [2Fe-2S] domain	-	-	-	-	Oxidative phosphorylation	1.A.24.1.1	-	-	GO:0006118,electron transport; GO:0008121,ubiquinol-cytochrome-c reductase activity; GO:0016020,membrane; GO:0016491,oxidoreductase activity	1.10.2.2	-	0.029	1	0.55	0.077	-0.11	0.9	0.52	0.091	0.97	0.00012	0.31	0.26
810	PF03009:Glycerophosphoryl diester phosphodiesterase family	-	-	-	S	Phospholipid degradation; Glycerolipid metabolism	-	-	-	GO:0006071,glycerol metabolic process; GO:0008889,glycerophosphodiester phosphodiesterase activity	3.1.4.46	-	0.029	1	-0.006	0.99	-1.1	0.01	-0.035	0.96	-3.6	9.4e-30	-4.6	4.3e-49
811	PF07716:Basic region leucine zipper	TF	-	-	-	-	-	-	-	GO:0003700,transcription factor activity; GO:0005634,nucleus; GO:0006355,regulation of transcription, DNA-dependent; GO:0043565,sequence-specific DNA binding; GO:0046983,protein dimerization activity	-	-	0.11	1	-0.18	0.78	0.38	0.74	-0.29	0.64	1.1	0.01	1.7	0.00011
812	PF05021:NPL4 family; PF05020:NPL4 family, putative zinc binding region	-	-	-	-	-	3.A.16.1.2	-	-	-	-	-	0.12	1	0.17	0.23	0.36	0.026	0.058	0.74	0.41	0.00035	0.6	2.3e-07
813	PF01693:Caulimovirus viroplasmin; PF05970:PIF1-like helicase; PF05970:PIF1-like helicase; PF05970:PIF1-like helicase	-	-	-	-	-	-	-	-	GO:0000166,nucleotide binding; GO:0017111,nucleoside-triphosphatase activity	-	-	0.00014	1	0.4	0.074	0.16	0.76	0.4	0.071	1.2	1.7e-11	0.97	1.3e-07
814	-	-	-	-	-	-	-	-	-	GO:0004672,protein kinase activity; GO:0005524,ATP binding; GO:0006468,protein amino acid phosphorylation	-	-	-0.2	1	0.036	0.96	-0.94	-	0.23	0.68	1.8	0.00022	0.78	0.072
815	PF00620:RhoGAP domain	-	-	-	-	-	-	-	-	GO:0005622,intracellular; GO:0007165,signal transduction	-	-	0.11	1	-0.06	0.81	0.21	0.56	-0.17	0.45	0.81	9.3e-07	1.1	4.9e-11
816	PF08423:Rad51; PF14520:Helix-hairpin-helix domain	-	-	-	S	-	-	-	-	GO:0003677,DNA binding; GO:0005524,ATP binding; GO:0006259,DNA metabolic process; GO:0008094,DNA-dependent ATPase activity; GO:0000166,nucleotide binding; GO:0017111,nucleoside-triphosphatase activity; GO:0005515,protein binding; GO:0003684,damaged DNA binding; GO:0006281,DNA repair	-	-	-0.023	1	0.16	0.38	-0.24	0.36	0.18	0.31	0.45	0.0014	0.046	0.78
817	PF00389:D-isomer specific 2-hydroxyacid dehydrogenase, catalytic domain; PF02826:D-isomer specific 2-hydroxyacid dehydrogenase, NAD binding domain	-	-	-	-	Glycine, serine and threonine metabolism	-	-	-	GO:0008152,metabolic process; GO:0016616,oxidoreductase activity, acting on the CH-OH group of donors, NAD or NADP as acceptor; GO:0051287,NAD binding; GO:0048037,cofactor binding; GO:0003824,catalytic activity; GO:0005488,binding; GO:0004617,phosphoglycerate dehydrogenase activity	1.1.1.95	-	-0.18	1	0.89	0.01	0.056	0.96	1.1	0.0014	1.8	1.3e-10	1	0.00066
818	PF00117:Glutamine amidotransferase class-I; PF00977:Histidine biosynthesis protein; PF00977:Histidine biosynthesis protein	-	-	-	-	-	-	-	-	GO:0003824,catalytic activity; GO:0000105,histidine biosynthetic process; GO:0000107,imidazoleglycerol-phosphate synthase activity; GO:0005737,cytoplasm; GO:0009382,imidazoleglycerol-phosphate synthase complex; GO:0016763,transferase activity, transferring pentosyl groups; GO:0008152,metabolic process; GO:0006541,glutamine metabolic process; GO:0018071,NAD(P)-cysteine ADP-ribosyltransferase activ…	2.4.2.-	-	-0.3	0.95	0.14	0.68	-0.3	0.58	0.44	0.13	1.8	9.8e-14	1.3	2.6e-08
819	PF08316:Pal1 cell morphology protein	-	-	-	-	-	-	-	-	-	-	-	0.13	1	-0.6	0.18	0.21	0.85	-0.73	0.088	-0.2	0.62	0.61	0.096
820	PF03031:NLI interacting factor-like phosphatase	-	-	-	-	-	-	-	-	GO:0016791,phosphoric monoester hydrolase activity	-	-	-0.68	0.75	-0.56	0.24	0.088	0.95	0.11	0.86	-1.1	0.0035	-0.45	0.27
821	-	-	-	-	S	-	-	-	-	-	-	-	-0.24	-	-0.6	0.32	-0.064	-	-0.36	0.57	1.4	0.019	2	0.00069
822	PF08433:Chromatin associated protein KTI12	-	-	-	-	-	-	-	-	-	-	-	-0.31	0.98	-0.42	0.25	-0.25	0.68	-0.12	0.79	-1.7	4.7e-10	-1.5	2.6e-08
823	PF10250:GDP-fucose protein O-fucosyltransferase	-	-	-	-	-	-	-	-	-	-	-	-0.3	0.96	-0.28	0.42	-0.26	0.55	0.02	0.96	-3.4	4.1e-54	-3.4	1.1e-51
824	PF00651:BTB/POZ domain	-	-	-	-	-	-	-	-	GO:0005515,protein binding	-	-	-0.17	0.88	-0.015	0.94	0.071	0.85	0.16	0.28	0.6	2.1e-07	0.69	3e-09
825	PF00412:LIM domain; PF00412:LIM domain; PF00620:RhoGAP domain	-	-	-	-	-	-	-	-	GO:0005622,intracellular; GO:0007165,signal transduction; GO:0008270,zinc ion binding	-	-	-0.0028	1	-0.083	0.8	0.29	0.49	-0.08	0.81	0.28	0.2	0.66	0.0018
826	PF00135:Carboxylesterase family	-	-	-	S	-	-	MER045876	-	GO:0004091,carboxylesterase activity	3.1.1.1	-	-1.2	0.53	-0.8	0.25	0.34	0.84	0.36	0.65	-1	0.069	0.11	0.87
827	PF00106:short chain dehydrogenase	-	-	-	-	-	-	-	-	GO:0008152,metabolic process; GO:0016491,oxidoreductase activity; GO:0003824,catalytic activity; GO:0005488,binding; GO:0043738,F420H2 dehydrogenase activity; GO:0043826,sulfur oxygenase reductase activity; GO:0043883,malolactic enzyme activity; GO:0051341,regulation of oxidoreductase activity	1.-.-.-	-	-0.51	-	1.2	-	1	-	1.7	0.15	1.2	0.26	0.96	0.39
828	PF00106:short chain dehydrogenase	-	-	-	S	-	-	-	-	GO:0008152,metabolic process; GO:0016491,oxidoreductase activity; GO:0003824,catalytic activity; GO:0005488,binding; GO:0043738,F420H2 dehydrogenase activity; GO:0043826,sulfur oxygenase reductase activity; GO:0043883,malolactic enzyme activity; GO:0051341,regulation of oxidoreductase activity	1.-.-.-	-	0.012	1	0.72	0.049	0.16	0.82	0.7	0.052	-1	7.1e-05	-1.6	5.8e-08
829	PF01425:Amidase	-	-	-	-	Tryptophan metabolism; Benzoate degradation via CoA ligation; Cyanoamino acid metabolism; Phenylalanine metabolism; Arginine and proline metabolism; Styrene degradation	-	-	-	GO:0016884,carbon-nitrogen ligase activity, with glutamine as amido-N-donor; GO:0004040,amidase activity	3.5.1.4	-	-0.32	0.95	-0.47	0.13	-0.64	0.073	-0.16	0.68	-1.9	1.4e-15	-2.1	2.2e-18
830	PF03031:NLI interacting factor-like phosphatase	-	-	-	-	-	-	-	-	GO:0016791,phosphoric monoester hydrolase activity	-	-	-0.058	1	0.013	0.96	-0.028	0.97	0.071	0.81	-0.21	0.29	-0.25	0.2
831	PF04387:Protein tyrosine phosphatase-like protein, PTPLA	-	-	-	-	-	-	-	-	GO:0003700,transcription factor activity; GO:0005634,nucleus; GO:0006355,regulation of transcription, DNA-dependent; GO:0043565,sequence-specific DNA binding; GO:0046983,protein dimerization activity	-	-	-0.059	1	0.15	0.56	-0.18	0.69	0.21	0.4	0.39	0.045	0.053	0.82
832	PF00026:Eukaryotic aspartyl protease	-	-	-	S	-	8.A.32.1.1	MER155796	-	GO:0005529,sugar binding; GO:0004194,pepsin A activity; GO:0006508,proteolysis; GO:0004190,aspartic-type endopeptidase activity; GO:0004192,cathepsin D activity	3.4.23.5	-	-0.22	1	-0.28	0.52	0.11	0.93	-0.061	0.91	0.77	0.021	1.2	0.00039
833	PF00106:short chain dehydrogenase	-	-	-	-	-	-	-	-	GO:0008152,metabolic process; GO:0016491,oxidoreductase activity; GO:0003824,catalytic activity; GO:0005488,binding; GO:0043738,F420H2 dehydrogenase activity; GO:0043826,sulfur oxygenase reductase activity; GO:0043883,malolactic enzyme activity; GO:0051341,regulation of oxidoreductase activity	1.-.-.-	-	-0.28	1	-0.062	0.91	-0.27	0.77	0.21	0.67	0.07	0.87	-0.14	0.73
834	-	-	-	GH16	S	-	-	-	-	-	-	-	-0.14	1	-0.98	0.024	-1.3	0.0045	-0.84	0.056	-1.9	9.6e-08	-2.2	1.9e-10
835	PF13812:Pentatricopeptide repeat domain; PF13812:Pentatricopeptide repeat domain; PF13812:Pentatricopeptide repeat domain; PF13812:Pentatricopeptide repeat domain	-	-	-	-	-	-	-	-	-	-	-	-0.025	1	0.62	0.11	-0.08	0.95	0.64	0.089	1.9	8.1e-10	1.2	0.00015
836	PF04825:N terminus of Rad21 / Rec8 like protein; PF04824:Conserved region of Rad21 / Rec8 like protein	-	-	-	-	-	-	-	-	GO:0000228,nuclear chromosome	-	-	-0.055	1	0.02	0.9	-0.16	0.4	0.075	0.58	0.78	7.9e-16	0.6	9e-10
837	PF00291:Pyridoxal-phosphate dependent enzyme	-	-	-	S	-	-	-	-	GO:0006535,cysteine biosynthetic process from serine; GO:0003824,catalytic activity; GO:0008152,metabolic process; GO:0030170,pyridoxal phosphate binding; GO:0004124,cysteine synthase activity	2.5.1.47	-	-0.12	1	0.83	0.061	-0.062	0.97	0.95	0.029	1.6	1.3e-05	0.67	0.076
838	PF00025:ADP-ribosylation factor family	-	-	-	-	-	-	-	-	GO:0005525,GTP binding; GO:0007264,small GTPase mediated signal transduction; GO:0015031,protein transport; GO:0005622,intracellular; GO:0006886,intracellular protein transport	-	-	-0.16	1	-0.83	0.0039	-0.27	0.62	-0.67	0.023	-0.79	0.0012	-0.23	0.39
839	PF13855:Leucine rich repeat	-	-	-	S	-	-	-	-	GO:0005515,protein binding	-	-	-0.02	1	-0.56	0.013	0.42	0.18	-0.54	0.017	0.24	0.22	1.2	6.1e-11
840	PF00240:Ubiquitin family; PF00627:UBA/TS-N domain	-	-	-	-	-	-	-	-	GO:0006464,protein modification process	-	-	-0.085	1	-0.3	0.14	0.14	0.74	-0.22	0.31	0.72	1.5e-05	1.2	9.4e-13
841	PF02734:DAK2 domain; PF02734:DAK2 domain; PF02733:Dak1 domain; PF02733:Dak1 domain; PF02733:Dak1 domain	-	-	-	-	Glycerolipid metabolism	-	-	-	GO:0004371,glycerone kinase activity; GO:0006071,glycerol metabolic process	2.7.1.29	-	0.49	1	0.56	0.61	0.12	0.97	0.072	0.96	0.28	0.75	-0.16	0.87
842	PF00443:Ubiquitin carboxyl-terminal hydrolase; PF06337:DUSP domain	-	-	-	-	Methane metabolism	-	MER093159	-	GO:0004221,ubiquitin thiolesterase activity; GO:0006511,ubiquitin-dependent protein catabolic process; GO:0006512,ubiquitin cycle; GO:0018738,S-formylglutathione hydrolase activity	3.1.2.12	-	0.2	0.94	-0.17	0.41	0.23	0.44	-0.37	0.046	0.059	0.74	0.45	0.0031
843	PF08217:Fungal domain of unknown function (DUF1712)	-	-	-	S	-	-	-	-	-	-	-	0.11	1	-0.42	0.15	0.37	0.41	-0.53	0.065	-0.98	2.6e-05	-0.19	0.47
844	PF02466:Tim17/Tim22/Tim23/Pmp24 family	-	-	-	S	-	3.A.8.1.1	-	-	GO:0005743,mitochondrial inner membrane; GO:0008565,protein transporter activity; GO:0015031,protein transport	-	-	-0.2	0.98	0.24	0.26	-0.33	0.24	0.44	0.03	-0.36	0.034	-0.93	1.4e-08
845	PF07958:Protein of unknown function (DUF1688)	-	-	-	S	Histidine metabolism	-	-	-	GO:0003824,catalytic activity; GO:0000105,histidine biosynthetic process; GO:0004401,histidinol-phosphatase activity	3.1.3.15	-	0.14	0.81	-0.18	0.079	-0.069	0.76	-0.31	0.0009	0.59	6e-13	0.7	9.1e-18
846	-	-	-	-	-	-	-	-	-	-	-	-	-0.3	0.94	-0.33	0.27	0.048	0.96	-0.035	0.93	-1.9	8.5e-17	-1.5	4.8e-11
847	PF02167:Cytochrome C1 family	-	-	-	-	Oxidative phosphorylation	3.D.3.3.1	-	-	GO:0005506,iron ion binding; GO:0006118,electron transport; GO:0009055,electron carrier activity; GO:0020037,heme binding; GO:0008121,ubiquinol-cytochrome-c reductase activity	1.10.2.2	-	0.09	1	0.76	0.056	-0.0013	1	0.67	0.091	1.6	1.2e-06	0.79	0.017
848	PF03399:SAC3/GANP family	-	-	-	S	-	-	-	-	-	-	-	-0.08	1	0.045	0.76	0.3	0.023	0.13	0.33	-0.56	3.4e-09	-0.3	0.0026
849	PF01974:tRNA intron endonuclease, catalytic C-terminal domain	-	-	-	-	-	-	-	-	GO:0000213,tRNA-intron endonuclease activity; GO:0000214,tRNA-intron endonuclease complex; GO:0006388,tRNA splicing	3.1.27.9	-	-0.088	1	0.2	0.36	0.024	0.97	0.28	0.16	0.31	0.069	0.13	0.46
850	PF00400:WD domain, G-beta repeat	-	-	-	-	-	-	-	-	-	-	-	0.023	1	0.015	0.94	-0.048	0.92	-0.0083	0.97	0.5	0.00011	0.43	0.00089
851	PF00266:Aminotransferase class-V	-	-	-	-	Glycine, serine and threonine metabolism; Alanine and aspartate metabolism	-	-	-	GO:0008152,metabolic process; GO:0008453,alanine-glyoxylate transaminase activity	2.6.1.44	-	0.085	1	-0.4	0.044	-0.23	0.48	-0.48	0.013	-0.83	1.8e-07	-0.66	4.1e-05
852	PF01077:Nitrite and sulphite reductase 4Fe-4S domain; PF00258:Flavodoxin; PF03460:Nitrite/Sulfite reductase ferredoxin-like half domain; PF03460:Nitrite/Sulfite reductase ferredoxin-like half domain; PF01077:Nitrite and sulphite reductase 4Fe-4S domain	-	-	-	-	-	-	-	-	GO:0005506,iron ion binding; GO:0006118,electron transport; GO:0009055,electron carrier activity; GO:0010181,FMN binding; GO:0016491,oxidoreductase activity; GO:0020037,heme binding; GO:0051536,iron-sulfur cluster binding; GO:0003824,catalytic activity; GO:0008152,metabolic process; GO:0004783,sulfite reductase (NADPH) activity; GO:0008652,amino acid biosynthetic process; GO:0009337,sulfite reduc…	1.2.7.-	-	0.34	1	0.75	0.079	0.28	0.76	0.41	0.37	1.8	1.1e-07	1.3	0.00011
853	PF01248:Ribosomal protein L7Ae/L30e/S12e/Gadd45 family	-	-	-	-	-	-	-	-	GO:0003735,structural constituent of ribosome; GO:0005622,intracellular; GO:0005840,ribosome; GO:0006412,translation	-	-	-0.1	1	0.93	0.059	-0.16	0.91	1	0.034	1.2	0.0043	0.063	0.9
854	PF00022:Actin; PF00022:Actin	-	-	-	-	-	-	-	-	GO:0005515,protein binding	-	-	0.12	1	0.25	0.29	-0.27	0.47	0.13	0.62	0.76	3.3e-05	0.24	0.23
855	PF13243:Squalene-hopene cyclase C-terminal domain; PF13249:Squalene-hopene cyclase N-terminal domain	-	-	-	-	Sterol biosynthesis	-	-	-	GO:0003824,catalytic activity; GO:0008152,metabolic process; GO:0016829,lyase activity; GO:0000250,lanosterol synthase activity	5.4.99.7	-	0.079	1	0.39	0.11	0.21	0.64	0.31	0.21	-0.61	0.0016	-0.8	4.2e-05
856	-	-	-	-	S	-	-	-	-	-	-	-	-0.096	1	-0.34	0.32	0.34	0.51	-0.24	0.49	-1.1	1.8e-05	-0.4	0.14
857	PF03332:Eukaryotic phosphomannomutase	-	-	-	-	Fructose and mannose metabolism	-	-	-	GO:0004615,phosphomannomutase activity; GO:0005737,cytoplasm; GO:0019307,mannose biosynthetic process; GO:0003824,catalytic activity; GO:0008152,metabolic process	5.4.2.8	-	-0.00072	1	-0.24	0.32	-0.28	0.44	-0.24	0.32	0.57	0.0022	0.53	0.0048
858	PF18826:bacteroidetes VLRF1 release factor	-	-	-	S	-	-	-	-	-	-	-	-0.3	1	0.26	0.59	0.17	0.88	0.56	0.19	0.84	0.015	0.75	0.032
859	PF14260:C4-type zinc-finger of DNA polymerase delta; PF03104:DNA polymerase family B, exonuclease domain; PF00136:DNA polymerase family B	-	-	-	-	Purine metabolism; DNA polymerase; Pyrimidine metabolism	-	-	-	GO:0000166,nucleotide binding; GO:0003677,DNA binding; GO:0003887,DNA-directed DNA polymerase activity; GO:0005634,nucleus; GO:0006260,DNA replication; GO:0003676,nucleic acid binding; GO:0006139,nucleobase, nucleoside, nucleotide and nucleic acid metabolic process; GO:0034061,DNA polymerase activity	2.7.7.7	-	0.094	1	1	0.0007	0.18	0.8	0.92	0.0025	0.6	0.022	-0.23	0.43
860	PF08164:Apoptosis-antagonizing transcription factor, C-terminal; PF13339:Apoptosis antagonizing transcription factor	TF	-	-	S	-	-	-	-	GO:0005634,nucleus	-	-	0.036	1	0.13	0.59	0.54	0.041	0.097	0.71	0.91	1.9e-07	1.3	1.1e-13
861	-	-	-	-	-	-	-	-	-	-	-	-	-0.13	1	0.15	0.71	0.51	0.3	0.29	0.44	1.1	6.7e-05	1.5	1.3e-07
862	PF00787:PX domain	-	-	-	-	-	-	-	-	GO:0005515,protein binding; GO:0007154,cell communication; GO:0035091,phosphoinositide binding	-	-	-0.054	1	-0.1	0.55	0.15	0.59	-0.05	0.8	0.29	0.025	0.55	1.8e-05
863	-	-	-	-	-	-	-	-	-	-	-	-	0.14	0.94	-0.12	0.4	0.27	0.13	-0.26	0.046	0.19	0.097	0.57	1.6e-07
864	PF08590:Domain of unknown function (DUF1771); PF18345:Zinc finger domain; PF01713:Smr domain	-	-	-	-	-	-	-	-	GO:0003676,nucleic acid binding; GO:0008270,zinc ion binding	-	-	0.043	1	-0.53	0.00019	-0.13	0.66	-0.57	4.3e-05	0.7	2.4e-08	1.1	3.5e-19
865	PF04082:Fungal specific transcription factor domain	TF	-	-	-	-	-	-	-	GO:0003700,transcription factor activity; GO:0005634,nucleus; GO:0006355,regulation of transcription, DNA-dependent; GO:0008270,zinc ion binding; GO:0003677,DNA binding; GO:0006350,transcription	-	-	-0.059	1	-0.054	0.84	-0.011	0.99	0.0047	0.99	0.53	0.0018	0.57	0.00077
866	PF01545:Cation efflux family	-	-	-	S	-	2.A.4.4.5	-	-	GO:0006812,cation transport; GO:0008324,cation transmembrane transporter activity; GO:0016020,membrane	-	-	-0.02	1	0.12	0.57	0.13	0.76	0.14	0.5	-0.15	0.37	-0.15	0.38
867	PF04078:Cell differentiation family, Rcd1-like	-	-	-	-	-	-	-	-	GO:0005488,binding	-	-	-0.22	0.94	0.1	0.68	0.064	0.92	0.33	0.13	-0.64	0.0002	-0.68	8.3e-05
868	PF00169:PH domain	-	-	-	-	-	-	-	-	-	-	-	0.16	0.98	-0.43	0.012	0.18	0.54	-0.58	0.00033	-1	3e-14	-0.43	0.0024
869	PF04194:Programmed cell death protein 2, C-terminal putative domain	-	-	-	S	-	-	-	-	GO:0005737,cytoplasm	-	-	-0.064	1	0.55	0.056	0.094	0.91	0.61	0.03	0.42	0.083	-0.037	0.9
870	PF04082:Fungal specific transcription factor domain	TF	-	-	-	-	-	-	-	GO:0003677,DNA binding; GO:0005634,nucleus; GO:0006350,transcription; GO:0008270,zinc ion binding	-	-	-0.033	1	-0.52	0.01	-0.096	0.86	-0.48	0.017	0.23	0.2	0.65	0.00012
871	PF00071:Ras family	-	-	-	-	-	9.A.50.1.1	-	-	GO:0005525,GTP binding; GO:0007264,small GTPase mediated signal transduction; GO:0005622,intracellular; GO:0015031,protein transport	-	-	-0.13	1	0.087	0.72	-0.13	0.72	0.21	0.31	-1.1	3.3e-14	-1.4	8.9e-19
872	PF09268:Clathrin, heavy-chain linker; PF13838:Clathrin-H-link; PF00637:Region in Clathrin and VPS; PF00637:Region in Clathrin and VPS; PF00637:Region in Clathrin and VPS; PF00637:Region in Clathrin and VPS; PF00637:Region in Clathrin and VPS; PF00637:Region in Clathrin and VPS; PF00637:Region in Clathrin and VPS; PF01394:Clathrin propeller repeat; PF01394:Clathrin propeller repeat; PF01394:Clathr…	-	-	-	-	-	-	-	-	GO:0005515,protein binding; GO:0006886,intracellular protein transport; GO:0016192,vesicle-mediated transport; GO:0005198,structural molecule activity; GO:0006461,protein complex assembly; GO:0008565,protein transporter activity; GO:0030130,clathrin coat of trans-Golgi network vesicle; GO:0030132,clathrin coat of coated pit; GO:0005488,binding	-	-	0.16	0.98	0.064	0.76	0.52	0.0043	-0.095	0.63	-0.16	0.28	0.3	0.038
873	PF00271:Helicase conserved C-terminal domain; PF13959:Domain of unknown function (DUF4217); PF00270:DEAD/DEAH box helicase	-	-	-	-	Starch and sucrose metabolism; Folate biosynthesis	3.A.18.1.1	-	-	GO:0003676,nucleic acid binding; GO:0005524,ATP binding; GO:0008026,ATP-dependent helicase activity; GO:0004386,helicase activity; GO:0000810,diacylglycerol pyrophosphate phosphatase activity; GO:0004787,thiamin-pyrophosphatase activity; GO:0008413,8-oxo-7,8-dihydroguanine triphosphatase activity; GO:0008758,UDP-2,3-diacylglucosamine hydrolase activity; GO:0008796,bis(5'-nucleosyl)-tetraphosphata…	3.6.1.-	-	0.019	1	0.35	0.33	0.099	0.93	0.33	0.36	1.3	1.9e-06	1.1	0.00015
874	PF03315:Serine dehydratase beta chain; PF03313:Serine dehydratase alpha chain	-	-	-	-	-	-	-	-	-	-	-	0.14	1	0.67	0.043	0.033	0.98	0.53	0.11	0.62	0.024	-0.018	0.96
875	-	-	-	-	-	-	2.A.7.13.1	-	-	GO:0005338,nucleotide-sugar transmembrane transporter activity; GO:0015780,nucleotide-sugar transport; GO:0016021,integral to membrane	-	-	0.047	1	-0.13	0.57	-0.17	0.64	-0.17	0.42	-0.82	2.5e-07	-0.86	6.2e-08
876	PF00682:HMGL-like; PF02436:Conserved carboxylase domain; PF02786:Carbamoyl-phosphate synthase L chain, ATP binding domain; PF00364:Biotin-requiring enzyme; PF00289:Biotin carboxylase, N-terminal domain; PF02785:Biotin carboxylase C-terminal domain	-	-	-	-	Alanine and aspartate metabolism; Citrate cycle (TCA cycle); Pyruvate metabolism	3.B.1.1.1	-	-	GO:0003824,catalytic activity; GO:0005524,ATP binding; GO:0008152,metabolic process; GO:0016874,ligase activity; GO:0004736,pyruvate carboxylase activity; GO:0005737,cytoplasm; GO:0006094,gluconeogenesis; GO:0009374,biotin binding; GO:0000175,3'-5'-exoribonuclease activity; GO:0003723,RNA binding; GO:0006396,RNA processing	6.4.1.1	-	0.31	0.94	-0.37	0.21	0.42	0.29	-0.68	0.015	-0.44	0.062	0.35	0.15
877	PF00106:short chain dehydrogenase	-	-	-	-	Porphyrin and chlorophyll metabolism	-	-	-	GO:0008152,metabolic process; GO:0016491,oxidoreductase activity; GO:0003824,catalytic activity; GO:0005488,binding; GO:0016630,protochlorophyllide reductase activity	1.3.1.33	-	-0.18	1	0.22	0.65	-0.59	0.33	0.4	0.38	-0.48	0.18	-1.3	0.00015
878	-	-	-	-	S	-	-	-	-	-	-	-	-0.2	1	0.21	0.53	0.035	0.97	0.41	0.18	-1.1	3.4e-06	-1.3	1.2e-07
879	PF00067:Cytochrome P450; PF00067:Cytochrome P450	-	CYP62	-	S	-	-	-	-	GO:0004497,monooxygenase activity; GO:0005506,iron ion binding; GO:0006118,electron transport; GO:0020037,heme binding	-	-	-1.2	0.9	-0.22	0.87	0.15	0.96	0.95	0.38	-1.5	0.082	-1.1	0.21
880	PF00067:Cytochrome P450; PF00067:Cytochrome P450	-	CYP67	-	S	Tryptophan metabolism; Fatty acid metabolism; gamma-Hexachlorocyclohexane degradation	-	-	-	GO:0004497,monooxygenase activity; GO:0005506,iron ion binding; GO:0006118,electron transport; GO:0020037,heme binding; GO:0050381,unspecific monooxygenase activity	1.14.14.1	-	0.16	1	0.71	0.18	0.16	0.92	0.55	0.32	-0.32	0.48	-0.87	0.047
881	PF03190:Protein of unknown function, DUF255	-	-	-	-	-	-	-	-	GO:0003824,catalytic activity	-	-	0.25	0.75	-0.17	0.36	0.32	0.14	-0.42	0.012	0.07	0.66	0.56	6.2e-05
882	PF00962:Adenosine/AMP deaminase	-	-	-	S	Purine metabolism	-	-	-	GO:0009168,purine ribonucleoside monophosphate biosynthetic process; GO:0019239,deaminase activity; GO:0004000,adenosine deaminase activity; GO:0046936,deoxyadenosine deaminase activity	3.5.4.4	-	-0.061	1	0.4	0.47	0.04	0.98	0.46	0.4	1	0.013	0.67	0.12
883	-	-	-	-	-	-	-	-	-	-	-	-	0.15	1	-0.064	0.86	-0.37	0.41	-0.21	0.51	0.26	0.3	-0.047	0.87
884	PF07714:Protein tyrosine kinase	-	-	-	-	-	-	-	-	GO:0004672,protein kinase activity; GO:0005524,ATP binding; GO:0006468,protein amino acid phosphorylation; GO:0004713,protein-tyrosine kinase activity; GO:0004674,protein serine/threonine kinase activity; GO:0004715,non-membrane spanning protein tyrosine kinase activity	2.7.10.2	-	-0.59	0.28	1.7	6.6e-10	-0.22	0.67	2.3	2e-18	-2.1	5.7e-22	-4	3.6e-61
885	PF01565:FAD binding domain; PF08031:Berberine and berberine like	-	-	-	S	-	-	-	-	GO:0016491,oxidoreductase activity; GO:0050660,FAD binding; GO:0003824,catalytic activity	-	-	0.66	0.53	1.3	0.00017	-0.06	0.96	0.67	0.079	2.3	9.4e-14	0.9	0.005
886	-	-	-	-	S	-	-	-	-	-	-	-	-0.071	1	-1.4	0.052	-1.1	0.32	-1.3	0.064	2.6	3.5e-05	2.9	1.5e-06
887	-	-	-	-	S	-	-	-	-	-	-	-	-0.23	-	1.6	-	0.67	-	1.8	0.062	0.84	0.28	-0.084	0.93
888	PF04884:Vitamin B6 photo-protection and homoeostasis	-	-	-	-	-	-	-	-	-	-	-	-0.16	1	0.44	0.12	-0.2	0.73	0.59	0.03	0.18	0.46	-0.45	0.055
889	PF00394:Multicopper oxidase; PF07731:Multicopper oxidase; PF07732:Multicopper oxidase	-	-	AA1_2	-	-	9.A.10.1.7	-	-	GO:0016491,oxidoreductase activity; GO:0005507,copper ion binding; GO:0043738,F420H2 dehydrogenase activity; GO:0043826,sulfur oxygenase reductase activity; GO:0043883,malolactic enzyme activity; GO:0051341,regulation of oxidoreductase activity	1.-.-.-	Fenton	0.23	1	2.2	0.00011	-0.63	0.62	1.9	0.00065	6.7	7.5e-35	3.9	3.7e-14
890	PF03239:Iron permease FTR1 family	-	-	-	S	-	9.A.10.1.7	-	-	GO:0016020,membrane	-	Fenton	-0.056	1	1.6	0.0097	-1.5	0.23	1.7	0.0072	8.7	2.1e-18	5.5	1.9e-19
891	PF00067:Cytochrome P450	-	CYP51	-	-	Tryptophan metabolism; Fatty acid metabolism; gamma-Hexachlorocyclohexane degradation	-	-	-	GO:0004497,monooxygenase activity; GO:0005506,iron ion binding; GO:0006118,electron transport; GO:0020037,heme binding; GO:0050381,unspecific monooxygenase activity	1.14.14.1	-	1.2	0.083	1.4	0.0021	-0.56	0.56	0.2	0.74	2.5	4.4e-09	0.5	0.27
892	-	-	-	-	S	-	-	-	-	GO:0003676,nucleic acid binding; GO:0005622,intracellular; GO:0008270,zinc ion binding	-	-	-1.2	0.71	0.76	0.38	-0.2	0.94	2	0.012	-0.43	0.55	-1.4	0.041
893	PF00067:Cytochrome P450	-	CYP51	-	-	-	-	-	-	GO:0004497,monooxygenase activity; GO:0005506,iron ion binding; GO:0006118,electron transport; GO:0020037,heme binding; GO:0050591,quinine 3-monooxygenase activity	1.14.13.67	-	-1.5	0.9	-1	0.45	0.14	0.97	0.45	0.78	0.55	0.61	1.7	0.095
894	-	-	-	-	-	-	-	-	-	GO:0004402,histone acetyltransferase activity	2.3.1.48	-	0.049	1	0.74	0.062	-0.72	0.2	0.69	0.08	1.8	1.1e-07	0.3	0.41
895	-	-	-	-	-	-	-	-	-	-	-	-	-0.18	1	0.45	0.18	-0.13	0.88	0.63	0.05	0.77	0.0039	0.19	0.52
896	-	-	-	-	S	-	-	-	-	-	-	-	-0.14	1	-0.17	0.49	-0.046	0.94	-0.027	0.93	-1	1.4e-10	-0.92	2.6e-08
897	PF14234:Domain of unknown function (DUF4336)	-	-	-	-	-	-	-	-	-	-	-	-0.49	0.99	0.8	0.19	-0.5	0.63	1.3	0.027	-1.3	0.0058	-2.6	3.6e-08
898	-	-	-	-	-	-	-	-	-	-	-	-	-0.57	0.91	-0.37	0.51	0.31	0.78	0.2	0.76	-0.89	0.031	-0.21	0.65
899	PF09295:ChAPs (Chs5p-Arf1p-binding proteins)	-	-	-	-	-	-	-	-	-	-	-	0.035	1	0.24	0.17	0.27	0.25	0.2	0.25	0.88	9.5e-11	0.92	2.1e-11
900	PF00083:Sugar (and other) transporter	-	-	-	-	Pentose and glucuronate interconversions	2.A.1.9.5	-	-	GO:0005215,transporter activity; GO:0006810,transport; GO:0016021,integral to membrane; GO:0008733,L-arabinose isomerase activity	5.3.1.4	-	-0.022	1	-0.58	0.11	-0.53	0.29	-0.55	0.12	-0.011	0.98	0.035	0.93
901	PF00503:G-protein alpha subunit	-	-	-	-	-	-	-	-	GO:0004871,signal transducer activity; GO:0007186,G-protein coupled receptor protein signaling pathway; GO:0019001,guanyl nucleotide binding; GO:0007165,signal transduction	-	-	-0.13	1	-0.094	0.82	0.55	0.3	0.04	0.93	2.4	1.3e-18	3.1	3.6e-28
902	PF00696:Amino acid kinase family	-	-	-	-	Lysine biosynthesis; Glycine, serine and threonine metabolism	-	-	-	GO:0008652,amino acid biosynthetic process; GO:0004072,aspartate kinase activity; GO:0008152,metabolic process; GO:0016597,amino acid binding	2.7.2.4	-	-0.29	1	1.2	0.027	0.21	0.89	1.5	0.0044	1.3	0.0044	0.28	0.57
903	PF00083:Sugar (and other) transporter	-	-	-	-	Pentose and glucuronate interconversions	2.A.1.9.4	-	-	GO:0005215,transporter activity; GO:0006810,transport; GO:0016021,integral to membrane; GO:0008733,L-arabinose isomerase activity	5.3.1.4	-	0.18	1	1.2	0.00088	-1.3	0.00018	1	0.0061	-1.6	4.1e-08	-4	3.9e-44
904	PF07287:Acyclic terpene utilisation family protein AtuA; PF14330:Domain of unknown function (DUF4387)	-	-	-	-	-	-	-	-	-	-	-	1.2	0.31	3.7	3.2e-14	-0.63	0.52	2.5	1.1e-06	5.5	5.3e-33	1.1	0.023
905	PF07690:Major Facilitator Superfamily	-	-	-	-	-	2.A.1.13.4	-	-	GO:0005215,transporter activity; GO:0006810,transport; GO:0016021,integral to membrane	-	-	0.2	1	-0.097	0.81	-0.31	0.57	-0.3	0.4	-1.8	2.5e-13	-2.1	3.7e-16
906	PF00106:short chain dehydrogenase	-	-	-	-	Fatty acid biosynthesis (path 1)	-	-	-	GO:0008152,metabolic process; GO:0016491,oxidoreductase activity; GO:0003824,catalytic activity; GO:0005488,binding; GO:0004316,3-oxoacyl-[acyl-carrier-protein] reductase activity	1.1.1.100	-	-2.5	0.023	-3.4	1.1e-05	0.01	1	-0.9	0.32	-5.3	5.8e-15	-1.9	0.0073
907	PF13561:Enoyl-(Acyl carrier protein) reductase; PF00106:short chain dehydrogenase	-	-	-	-	Fatty acid biosynthesis (path 1)	-	-	-	GO:0008152,metabolic process; GO:0016491,oxidoreductase activity; GO:0003824,catalytic activity; GO:0005488,binding; GO:0004316,3-oxoacyl-[acyl-carrier-protein] reductase activity	1.1.1.100	-	-1.1	0.5	-2.1	0.00061	-0.099	0.96	-0.93	0.15	-5.8	3.1e-31	-3.9	1.1e-14
908	PF00106:short chain dehydrogenase	-	-	-	S	Fatty acid biosynthesis (path 1)	-	-	-	GO:0008152,metabolic process; GO:0016491,oxidoreductase activity; GO:0003824,catalytic activity; GO:0005488,binding; GO:0004316,3-oxoacyl-[acyl-carrier-protein] reductase activity	1.1.1.100	-	-0.34	1	-0.081	0.92	-0.72	0.43	0.26	0.72	-2.7	1.6e-08	-3.3	2.3e-12
909	-	-	-	-	-	-	-	-	-	-	-	-	-0.1	1	-0.32	0.67	0.42	0.74	-0.21	0.79	-2.8	1.6e-08	-2	4.4e-05
910	-	-	-	-	S	-	-	-	-	-	-	-	-0.15	-	-0.32	-	-0.24	-	-0.16	0.89	-0.068	0.94	0.011	0.99
911	-	-	-	-	-	-	-	-	-	GO:0005488,binding	-	-	-0.046	1	-0.086	0.61	0.23	0.26	-0.04	0.84	-0.39	0.00097	-0.077	0.57
912	-	-	-	-	-	-	-	-	-	-	-	-	-0.27	0.94	0.011	0.98	-0.21	0.65	0.28	0.32	-1.2	1.8e-09	-1.5	2e-12
913	PF13181:Tetratricopeptide repeat; PF12569:NMDA receptor-regulated protein 1	-	-	-	-	-	-	-	-	GO:0004596,peptide alpha-N-acetyltransferase activity	2.3.1.88	-	-0.052	1	0.46	0.15	0.18	0.8	0.51	0.1	1.2	1.7e-06	0.92	0.00028
914	-	-	-	-	-	-	-	-	-	GO:0005488,binding	-	-	-0.0097	1	0.61	0.026	0.12	0.87	0.62	0.022	0.33	0.16	-0.16	0.54
915	PF00935:Ribosomal protein L44	-	-	-	-	-	-	-	-	GO:0003735,structural constituent of ribosome; GO:0005622,intracellular; GO:0005840,ribosome; GO:0006412,translation	-	-	0.019	1	0.75	0.17	-0.32	0.79	0.73	0.18	0.86	0.051	-0.2	0.68
916	PF00069:Protein kinase domain	-	-	-	-	-	-	-	-	GO:0016773,phosphotransferase activity, alcohol group as acceptor; GO:0004672,protein kinase activity; GO:0005524,ATP binding; GO:0006468,protein amino acid phosphorylation; GO:0004713,protein-tyrosine kinase activity; GO:0004674,protein serine/threonine kinase activity; GO:0004693,cyclin-dependent protein kinase activity	2.7.11.22	-	-0.028	1	0.31	0.41	0.91	0.028	0.34	0.36	1.6	5.8e-09	2.2	4.6e-15
917	-	-	-	-	-	-	-	-	-	-	-	-	-0.42	1	0.13	0.88	-0.02	0.99	0.55	0.44	-1.8	0.00067	-2	0.00023
918	PF05470:Eukaryotic translation initiation factor 3 subunit 8 N-terminus; PF01399:PCI domain	-	-	-	-	-	-	-	-	GO:0003743,translation initiation factor activity; GO:0005852,eukaryotic translation initiation factor 3 complex; GO:0006413,translational initiation	-	-	-0.014	1	0.53	0.14	0.19	0.82	0.54	0.13	1.3	1e-05	0.92	0.0016
919	PF00132:Bacterial transferase hexapeptide (six repeats)	-	-	-	-	Pentose and glucuronate interconversions; Galactose metabolism; Nucleotide sugars metabolism; Starch and sucrose metabolism	-	-	-	GO:0008415,acyltransferase activity; GO:0016740,transferase activity; GO:0003983,UTP:glucose-1-phosphate uridylyltransferase activity	2.7.7.9	-	-0.21	0.98	0.39	0.11	0.47	0.13	0.6	0.011	0.42	0.036	0.5	0.014
920	PF00069:Protein kinase domain	-	-	-	-	-	-	-	-	GO:0004672,protein kinase activity; GO:0005524,ATP binding; GO:0006468,protein amino acid phosphorylation; GO:0004713,protein-tyrosine kinase activity; GO:0004674,protein serine/threonine kinase activity; GO:0004675,transmembrane receptor protein serine/threonine kinase activity; GO:0004676,3-phosphoinositide-dependent protein kinase activity; GO:0004677,DNA-dependent protein kinase activity; GO:…	2.7.11.-	-	-0.026	1	-0.22	0.24	0.065	0.9	-0.19	0.31	-0.34	0.022	-0.056	0.75
921	PF01583:Adenylylsulphate kinase	-	-	-	-	Sulfur metabolism; Selenoamino acid metabolism; Purine metabolism	-	-	-	GO:0000103,sulfate assimilation; GO:0005524,ATP binding; GO:0016301,kinase activity; GO:0016772,transferase activity, transferring phosphorus-containing groups; GO:0004020,adenylylsulfate kinase activity	2.7.1.25	-	-0.13	1	0.5	0.27	-0.27	0.78	0.62	0.15	1.4	7.2e-05	0.63	0.088
922	-	-	-	-	-	-	-	MER292680	-	-	-	-	-0.15	1	-0.43	0.021	0.078	0.88	-0.28	0.15	-0.31	0.055	0.2	0.22
923	-	-	-	-	-	-	-	MER292680	-	GO:0004219,pyroglutamyl-peptidase I activity; GO:0006508,proteolysis	3.4.19.3	-	0.53	0.32	0.34	0.2	-0.21	0.7	-0.18	0.53	0.91	1.4e-05	0.37	0.099
924	PF16193:AAA C-terminal domain; PF00004:ATPase family associated with various cellular activities (AAA); PF12002:MgsA AAA+ ATPase C terminal	-	-	-	-	Purine metabolism; DNA polymerase; Pyrimidine metabolism	-	-	-	GO:0005524,ATP binding; GO:0003887,DNA-directed DNA polymerase activity; GO:0034061,DNA polymerase activity	2.7.7.7	-	-0.071	1	0.38	0.046	-0.21	0.52	0.45	0.015	0.2	0.23	-0.39	0.015
925	PF00856:SET domain; PF05033:Pre-SET motif	-	-	-	-	Lysine degradation	-	-	-	GO:0005634,nucleus; GO:0008270,zinc ion binding; GO:0016568,chromatin modification; GO:0018024,histone-lysine N-methyltransferase activity	2.1.1.43	-	0.094	1	0.0006	1	0.43	0.055	-0.094	0.69	-0.012	0.95	0.42	0.0087
926	PF12756:C2H2 type zinc-finger (2 copies)	-	-	-	S	-	-	-	-	GO:0003676,nucleic acid binding; GO:0005622,intracellular; GO:0008270,zinc ion binding	-	-	0.027	1	0.00064	1	0.35	0.21	-0.026	0.93	1.4	1.3e-18	1.7	5.3e-28
927	PF12768:Cortical protein marker for cell polarity	-	-	-	S	-	-	-	-	GO:0005529,sugar binding; GO:0031177,phosphopantetheine binding	-	-	-0.011	1	-0.018	0.94	0.12	0.74	-0.0063	0.98	-0.53	8.6e-05	-0.4	0.0041
928	PF00775:Dioxygenase; PF04444:Catechol dioxygenase N terminus	-	-	-	-	Benzoate degradation via hydroxylation; 1,4-Dichlorobenzene degradation; gamma-Hexachlorocyclohexane degradation	-	-	-	GO:0003824,catalytic activity; GO:0006725,aromatic compound metabolic process; GO:0008199,ferric iron binding; GO:0005506,iron ion binding; GO:0009712,catechol metabolic process; GO:0018576,catechol 1,2-dioxygenase activity; GO:0016702,oxidoreductase activity, acting on single donors with incorporation of molecular oxygen, incorporation of two atoms of oxygen; GO:0018581,hydroxyquinol 1,2-dioxyge…	1.13.11.37	-	-0.35	-	-0.89	-	-0.67	-	-0.54	-	-1.6	-	-1.4	-
929	-	-	-	-	-	-	-	-	-	-	-	-	0.0054	1	0.49	0.23	-0.33	0.66	0.49	0.23	0.57	0.089	-0.26	0.47
930	PF02755:RPEL repeat; PF02755:RPEL repeat	-	-	-	-	-	-	-	-	-	-	-	-0.013	1	-1.1	0.12	-0.69	0.59	-1.1	0.12	0.36	0.58	0.79	0.2
931	PF06916:Protein of unknown function (DUF1279)	-	-	-	S	-	-	-	-	-	-	-	-0.14	1	0.21	0.61	0.24	0.77	0.35	0.37	1.1	0.00013	1.2	9.9e-05
932	PF01536:Adenosylmethionine decarboxylase	-	-	-	-	Arginine and proline metabolism	-	-	-	GO:0004014,adenosylmethionine decarboxylase activity; GO:0006597,spermine biosynthetic process; GO:0008295,spermidine biosynthetic process	4.1.1.50	-	-0.25	1	-0.075	0.86	0.15	0.87	0.18	0.65	-0.036	0.91	0.18	0.54
933	PF00172:Fungal Zn(2)-Cys(6) binuclear cluster domain; PF00172:Fungal Zn(2)-Cys(6) binuclear cluster domain	TF	-	-	-	-	-	-	-	GO:0003700,transcription factor activity; GO:0005634,nucleus; GO:0006355,regulation of transcription, DNA-dependent; GO:0008270,zinc ion binding	-	-	-0.15	1	-0.12	0.75	-0.12	0.91	0.027	0.96	1.6	3.4e-09	1.6	1.8e-09
934	PF08630:Dfp1/Him1, central region; PF07535:DBF zinc finger	-	-	-	-	-	-	-	-	GO:0005622,intracellular; GO:0003676,nucleic acid binding; GO:0008270,zinc ion binding	-	-	0.13	1	0.8	0.015	-0.19	0.82	0.67	0.047	1.2	2.4e-05	0.17	0.59
935	PF04130:Gamma tubulin complex component C-terminal	-	-	-	-	-	-	-	-	-	-	-	0.12	1	-0.095	0.68	0.19	0.56	-0.21	0.31	-0.84	3.4e-08	-0.55	0.00046
936	PF13401:AAA domain	-	-	-	-	-	-	-	-	GO:0000166,nucleotide binding; GO:0017111,nucleoside-triphosphatase activity	-	-	0.2	1	1.2	0.034	-0.11	0.95	0.99	0.079	1.9	5.7e-05	0.55	0.27
937	PF04406:Type IIB DNA topoisomerase	-	-	-	S	-	-	-	-	GO:0003677,DNA binding; GO:0003918,DNA topoisomerase (ATP-hydrolyzing) activity; GO:0005524,ATP binding; GO:0005694,chromosome; GO:0006259,DNA metabolic process; GO:0006265,DNA topological change	-	-	0.37	1	-0.28	0.61	0.46	0.58	-0.65	0.19	-0.61	0.12	0.12	0.79
938	-	-	-	-	S	-	-	-	-	GO:0005515,protein binding	-	-	0.081	1	-0.14	0.78	0.65	0.29	-0.22	0.66	-0.43	0.22	0.36	0.36
939	-	-	-	-	-	-	-	-	-	-	-	-	0.03	1	0.11	0.71	0.51	0.12	0.083	0.8	0.72	0.00067	1.1	1e-07
940	PF03200:Glycosyl hydrolase family 63 C-terminal domain	-	-	-	-	-	-	-	-	GO:0003824,catalytic activity	-	-	-0.16	1	-0.43	0.15	0.55	0.13	-0.27	0.38	-1.8	1.3e-14	-0.78	0.00091
941	PF00620:RhoGAP domain	-	-	-	-	Starch and sucrose metabolism	-	-	-	GO:0003700,transcription factor activity; GO:0005622,intracellular; GO:0006355,regulation of transcription, DNA-dependent; GO:0043565,sequence-specific DNA binding; GO:0007165,signal transduction; GO:0004339,glucan 1,4-alpha-glucosidase activity	3.2.1.3	-	0.076	1	-0.21	0.35	0.45	0.082	-0.29	0.18	-0.36	0.045	0.3	0.093
942	PF00153:Mitochondrial carrier protein; PF00153:Mitochondrial carrier protein	-	-	-	-	-	2.A.29.23.4	-	-	GO:0005488,binding; GO:0006810,transport; GO:0016020,membrane; GO:0005743,mitochondrial inner membrane	-	-	-0.23	0.6	-0.37	0.0064	-0.095	0.77	-0.14	0.35	0.33	0.0059	0.6	1.6e-07
943	PF00621:RhoGEF domain; PF15411:Pleckstrin homology domain; PF00564:PB1 domain; PF06395:CDC24 Calponin	-	-	-	-	-	-	-	-	GO:0005089,Rho guanyl-nucleotide exchange factor activity; GO:0005622,intracellular; GO:0035023,regulation of Rho protein signal transduction	-	-	0.041	1	-0.51	0.011	0.3	0.31	-0.55	0.0053	-0.66	8.6e-05	0.16	0.39
944	PF16589:BRCT domain, a BRCA1 C-terminus domain	-	-	-	-	-	-	-	-	GO:0005622,intracellular	-	-	-0.0089	1	-0.16	0.47	0.21	0.53	-0.15	0.5	-0.045	0.81	0.33	0.053
945	PF05721:Phytanoyl-CoA dioxygenase (PhyH)	-	-	-	-	-	-	-	-	-	-	-	-0.18	0.93	-0.13	0.47	-0.1	0.77	0.051	0.81	-0.21	0.13	-0.18	0.2
946	PF02110:Hydroxyethylthiazole kinase family; PF02581:Thiamine monophosphate synthase	-	-	-	S	-	-	-	-	GO:0004417,hydroxyethylthiazole kinase activity; GO:0009228,thiamin biosynthetic process; GO:0004789,thiamin-phosphate diphosphorylase activity	-	-	0.14	0.99	-0.023	0.92	0.098	0.81	-0.16	0.35	0.52	0.00011	0.64	2.1e-06
947	-	-	-	-	-	-	-	-	-	-	-	-	0.22	-	-0.12	-	0.67	-	-0.34	0.83	-0.77	0.59	0.031	0.98
948	-	-	-	-	S	-	-	-	-	-	-	-	0.68	0.88	0.12	0.82	-1.2	0.00045	-0.56	0.43	-6.5	9e-73	-7.8	1.6e-81
949	-	-	-	-	S	-	-	-	-	GO:0006508,proteolysis; GO:0009268,response to pH; GO:0016020,membrane; GO:0051090,regulation of transcription factor activity	-	-	-0.63	0.88	-0.28	0.64	-0.053	0.97	0.35	0.54	-2.4	1.2e-09	-2.2	3.8e-08
950	PF01169:Uncharacterized protein family UPF0016; PF01169:Uncharacterized protein family UPF0016	-	-	-	S	-	9.B.26.3.1	-	-	GO:0016020,membrane	-	-	0.13	1	-0.21	0.56	0.14	0.86	-0.34	0.31	-0.55	0.033	-0.2	0.47
951	PF00883:Cytosol aminopeptidase family, catalytic domain	-	-	-	S	-	-	MER019106	-	GO:0004177,aminopeptidase activity; GO:0005622,intracellular; GO:0006508,proteolysis; GO:0004178,leucyl aminopeptidase activity	3.4.11.1	-	-0.099	1	-0.43	0.054	-0.043	0.96	-0.33	0.14	1.3	5.3e-11	1.6	1.7e-18
952	PF12400:STIMATE family	-	-	-	S	-	-	-	-	-	-	-	-0.0052	1	-0.17	0.55	0.23	0.62	-0.16	0.57	0.17	0.44	0.56	0.0065
953	PF07819:PGAP1-like protein	-	-	-	S	-	-	-	-	GO:0006505,GPI anchor metabolic process; GO:0006886,intracellular protein transport; GO:0016788,hydrolase activity, acting on ester bonds; GO:0031227,intrinsic to endoplasmic reticulum membrane	-	-	0.013	1	-0.37	0.059	-0.025	0.97	-0.38	0.049	0.23	0.18	0.57	0.00039
954	PF01544:CorA-like Mg2+ transporter protein	-	-	-	-	-	-	-	-	GO:0016020,membrane; GO:0030001,metal ion transport; GO:0046873,metal ion transmembrane transporter activity	-	-	0.00099	1	-0.29	0.25	0.21	0.65	-0.29	0.24	0.2	0.35	0.7	0.00043
955	PF04979:Protein phosphatase inhibitor 2 (IPP-2)	-	-	-	-	-	-	-	-	-	-	-	-0.32	0.16	-0.19	0.16	-0.081	0.78	0.12	0.4	-0.74	3.1e-12	-0.63	5e-09
956	PF00763:Tetrahydrofolate dehydrogenase/cyclohydrolase, catalytic domain; PF02882:Tetrahydrofolate dehydrogenase/cyclohydrolase, NAD(P)-binding domain	-	-	-	-	One carbon pool by folate	-	-	-	GO:0003824,catalytic activity; GO:0009396,folic acid and derivative biosynthetic process; GO:0005488,binding; GO:0008152,metabolic process; GO:0004486,methylenetetrahydrofolate dehydrogenase activity; GO:0004487,methylenetetrahydrofolate dehydrogenase (NAD+) activity	1.5.1.15	-	-0.084	1	1.2	0.0015	-0.038	0.98	1.3	0.00058	2.7	1.9e-16	1.4	1.8e-05
957	PF04061:ORMDL family	-	-	-	-	-	-	-	-	GO:0016021,integral to membrane	-	-	-0.072	1	0.13	0.55	0.099	0.84	0.21	0.33	0.09	0.62	0.056	0.77
958	PF15912:Virilizer, N-terminal	-	-	-	-	-	-	-	-	-	-	-	0.13	1	-0.16	0.35	0.42	0.033	-0.29	0.069	0.99	5.6e-14	1.6	7.7e-33
959	-	-	-	-	S	-	-	-	-	-	-	-	-0.097	1	-0.29	0.13	0.2	0.53	-0.2	0.33	-0.7	3.6e-06	-0.21	0.2
960	PF02933:Cell division protein 48 (CDC48), domain 2; PF00004:ATPase family associated with various cellular activities (AAA); PF00004:ATPase family associated with various cellular activities (AAA); PF17862:AAA+ lid domain	-	-	-	-	-	1.F.1.1.1	-	-	GO:0005524,ATP binding; GO:0000166,nucleotide binding; GO:0017111,nucleoside-triphosphatase activity; GO:0005488,binding; GO:0008576,vesicle-fusing ATPase activity	3.6.4.6	-	0.072	1	-0.26	0.11	0.34	0.076	-0.33	0.035	0.32	0.015	0.92	4.3e-13
961	PF01399:PCI domain; PF18005:eIF3 subunit M, C-terminal helix	-	-	-	S	-	-	-	-	GO:0005488,binding	-	-	-0.16	1	0.21	0.47	-0.11	0.88	0.38	0.16	0.96	7.2e-06	0.64	0.0034
962	PF09418:Protein of unknown function (DUF2009); PF00643:B-box zinc finger	-	-	-	-	-	-	-	-	GO:0005622,intracellular; GO:0008270,zinc ion binding	-	-	-0.25	1	0.41	0.34	-0.056	0.97	0.66	0.097	0.86	0.0091	0.4	0.26
963	PF07052:Hepatocellular carcinoma-associated antigen 59	-	-	-	-	-	-	-	-	-	-	-	-0.11	1	-0.026	0.92	0.072	0.9	0.088	0.71	-0.14	0.42	-0.041	0.83
964	-	-	-	-	S	-	-	-	-	GO:0005509,calcium ion binding; GO:0005544,calcium-dependent phospholipid binding	-	-	-0.19	0.89	-0.12	0.49	0.069	0.87	0.069	0.73	0.25	0.062	0.44	0.0008
965	PF08271:TFIIB zinc-binding; PF00382:Transcription factor TFIIB repeat; PF00382:Transcription factor TFIIB repeat	-	-	-	-	-	-	-	-	GO:0005667,transcription factor complex; GO:0006352,transcription initiation; GO:0006355,regulation of transcription, DNA-dependent; GO:0008270,zinc ion binding; GO:0030528,transcription regulator activity; GO:0045449,regulation of transcription; GO:0003743,translation initiation factor activity; GO:0005515,protein binding; GO:0005634,nucleus; GO:0006413,translational initiation	-	-	-0.37	0.96	-0.86	0.017	-0.097	0.93	-0.49	0.19	-0.91	0.0025	-0.15	0.66
966	PF04939:Ribosome biogenesis regulatory protein (RRS1)	-	-	-	-	-	-	-	-	GO:0005634,nucleus; GO:0042254,ribosome biogenesis and assembly	-	-	-0.28	1	0.67	0.081	0.46	0.47	0.95	0.01	0.59	0.065	0.38	0.26
967	PF12341:Minichromosome loss protein, Mcl1, middle region; PF00400:WD domain, G-beta repeat; PF00400:WD domain, G-beta repeat	-	-	-	-	-	-	-	-	-	-	-	0.059	1	1	0.013	-0.24	0.81	0.99	0.019	1.5	2.9e-05	0.18	0.67
968	PF00398:Ribosomal RNA adenine dimethylase	-	-	-	-	-	-	-	-	GO:0000154,rRNA modification; GO:0000179,rRNA (adenine-N6,N6-)-dimethyltransferase activity; GO:0008649,rRNA methyltransferase activity	-	-	-0.051	1	0.39	0.13	-0.079	0.92	0.44	0.077	0.48	0.022	0.0091	0.97
969	PF05346:Eukaryotic membrane protein family; PF02463:RecF/RecN/SMC N terminal domain; PF06470:SMC proteins Flexible Hinge Domain	-	-	-	-	-	-	-	-	GO:0005524,ATP binding; GO:0005694,chromosome; GO:0006259,DNA metabolic process; GO:0016887,ATPase activity; GO:0005515,protein binding; GO:0051276,chromosome organization and biogenesis	-	-	0.08	1	0.13	0.34	0.023	0.96	0.051	0.75	-0.0045	0.97	-0.11	0.32
970	-	-	-	-	-	-	-	-	-	-	-	-	-0.27	1	-1	0.06	0.43	-	-0.73	0.16	-1.1	0.017	0.38	0.41
971	-	-	-	-	-	-	-	-	-	-	-	-	-0.49	0.98	-0.88	0.1	0.091	0.96	-0.39	0.51	2.4	1.6e-08	3.4	1e-15
972	PF00498:FHA domain	-	-	-	-	-	-	-	-	-	-	-	0.1	1	-0.25	0.41	-0.23	0.68	-0.35	0.22	1.1	8.3e-07	1.1	4.6e-07
973	-	-	-	-	S	-	-	-	-	-	-	-	-0.66	1	0.69	0.48	-0.097	0.97	1.4	0.13	1.6	0.034	0.78	0.32
974	PF00651:BTB/POZ domain; PF00651:BTB/POZ domain	-	-	-	-	-	-	-	-	GO:0005515,protein binding; GO:0030001,metal ion transport; GO:0046872,metal ion binding	-	-	-0.088	1	-0.46	0.2	-0.49	0.32	-0.37	0.31	-0.59	0.039	-0.62	0.029
975	PF08550:Fungal protein of unknown function (DUF1752)	-	-	-	S	N-Glycan degradation; Sphingoglycolipid metabolism	-	-	-	GO:0004308,exo-alpha-sialidase activity	3.2.1.18	-	0.35	0.67	0.078	0.78	0.44	0.13	-0.28	0.24	1.7	1.7e-20	2	1.4e-29
976	PF00651:BTB/POZ domain; PF00651:BTB/POZ domain	-	-	-	-	-	-	-	-	GO:0005515,protein binding; GO:0030001,metal ion transport; GO:0046872,metal ion binding	-	-	0.085	1	-0.97	0.065	-0.094	0.95	-1.1	0.043	-1.7	5.3e-05	-0.82	0.057
977	PF00106:short chain dehydrogenase	-	-	-	S	-	-	-	-	GO:0008152,metabolic process; GO:0016491,oxidoreductase activity; GO:0003824,catalytic activity; GO:0005488,binding; GO:0043738,F420H2 dehydrogenase activity; GO:0043826,sulfur oxygenase reductase activity; GO:0043883,malolactic enzyme activity; GO:0051341,regulation of oxidoreductase activity	1.-.-.-	-	0.16	1	2	0.056	-0.73	-	1.8	0.074	-1.4	0.047	-4.1	5.7e-06
978	PF01103:Surface antigen	-	-	-	-	-	-	-	-	GO:0019867,outer membrane	-	-	-0.11	1	0.3	0.06	0.028	0.96	0.42	0.0081	0.022	0.89	-0.25	0.065
979	PF03169:OPT oligopeptide transporter protein	-	-	-	S	-	2.A.67.1.6	-	-	-	-	-	0.13	1	0.62	0.026	0.089	0.89	0.49	0.081	-2.4	1.3e-35	-2.9	2.6e-44
980	PF00069:Protein kinase domain	-	-	-	-	-	-	-	-	GO:0004672,protein kinase activity; GO:0005524,ATP binding; GO:0006468,protein amino acid phosphorylation; GO:0004674,protein serine/threonine kinase activity; GO:0004675,transmembrane receptor protein serine/threonine kinase activity; GO:0004676,3-phosphoinositide-dependent protein kinase activity; GO:0004677,DNA-dependent protein kinase activity; GO:0004679,AMP-activated protein kinase activity…	2.7.11.-	-	0.096	1	0.017	0.96	-0.068	0.9	-0.078	0.82	-2.4	2.1e-44	-2.5	4.7e-42
981	PF00160:Cyclophilin type peptidyl-prolyl cis-trans isomerase/CLD	-	-	-	-	-	-	-	-	GO:0003755,peptidyl-prolyl cis-trans isomerase activity; GO:0006457,protein folding; GO:0004600,cyclophilin; GO:0030051,FK506-sensitive peptidyl-prolyl cis-trans isomerase; GO:0042027,cyclophilin-type peptidyl-prolyl cis-trans isomerase activity	5.2.1.8	-	-0.38	0.86	-0.16	0.66	-0.3	0.57	0.23	0.5	0.62	0.013	0.47	0.062
982	-	-	-	-	-	-	-	-	-	-	-	-	-0.4	0.98	-0.36	0.46	-1.5	0.00039	0.035	0.96	-2	7.5e-09	-3.1	4.9e-20
983	PF01775:Ribosomal proteins 50S-L18Ae/60S-L20/60S-L18A	-	-	-	-	-	-	-	-	GO:0003735,structural constituent of ribosome; GO:0005622,intracellular; GO:0005840,ribosome; GO:0006412,translation	-	-	-0.11	1	0.95	0.086	-0.088	0.96	1.1	0.053	1.3	0.0033	0.29	0.57
984	PF10191:Golgi complex component 7 (COG7); PF10191:Golgi complex component 7 (COG7)	-	-	-	-	-	-	-	-	-	-	-	0.2	1	0.29	0.3	-0.23	0.65	0.088	0.79	0.88	3.4e-05	0.37	0.1
985	-	-	-	-	S	-	-	-	-	-	-	-	-0.2	1	-0.16	0.79	0.036	0.98	0.037	0.96	-2.1	5.2e-08	-1.9	1.1e-06
986	-	-	-	-	S	-	-	-	-	-	-	-	-0.53	1	1	0.12	-0.23	0.9	1.6	0.014	-3.1	2.3e-09	-4.4	3.9e-17
987	-	-	-	-	-	-	-	-	-	-	-	-	-0.028	1	0.67	0.14	-0.35	0.55	0.7	0.12	-1.1	0.00015	-2.2	2.6e-10
988	PF02801:Beta-ketoacyl synthase, C-terminal domain; PF16197:Ketoacyl-synthetase C-terminal extension; PF14765:Polyketide synthase dehydratase; PF00109:Beta-ketoacyl synthase, N-terminal domain; PF00698:Acyl transferase domain	-	-	-	-	-	-	-	PKS	GO:0008152,metabolic process; GO:0003824,catalytic activity; GO:0005488,binding	-	-	0.54	0.96	0.28	0.66	0.27	0.87	-0.26	0.7	1.7	0.00025	1.7	0.00038
989	PF00550:Phosphopantetheine attachment site; PF00975:Thioesterase domain; PF08659:KR domain; PF08242:Methyltransferase domain	-	-	-	-	-	-	-	PKS	GO:0009058,biosynthetic process; GO:0016788,hydrolase activity, acting on ester bonds; GO:0031177,phosphopantetheine binding; GO:0048037,cofactor binding; GO:0003824,catalytic activity; GO:0005488,binding; GO:0008152,metabolic process	-	-	0.27	1	0.24	0.59	0.49	0.41	-0.03	0.96	-1.3	6.4e-05	-1	0.0019
990	PF01302:CAP-Gly domain	-	-	-	-	-	-	-	-	GO:0000150,recombinase activity; GO:0003677,DNA binding; GO:0006310,DNA recombination	-	-	0.15	1	-0.06	0.82	0.48	0.062	-0.21	0.37	0.3	0.1	0.84	1.7e-06
991	PF12348:CLASP N terminal	-	-	-	-	-	-	-	-	GO:0005488,binding	-	-	-0.17	1	0.4	0.29	0.56	0.29	0.56	0.11	1.2	6.8e-05	1.3	7.8e-06
992	-	-	-	-	-	-	-	-	-	-	-	-	-0.25	0.98	0.55	0.039	0.12	0.87	0.8	0.0015	0.69	0.0016	0.25	0.28
993	PF02045:CCAAT-binding transcription factor (CBF-B/NF-YA) subunit B	TF	-	-	S	-	-	-	-	GO:0003700,transcription factor activity; GO:0005634,nucleus; GO:0006355,regulation of transcription, DNA-dependent	-	-	-0.045	1	-0.38	0.061	0.31	0.29	-0.33	0.098	0.27	0.13	0.96	6e-09
994	-	-	-	-	-	-	-	-	-	-	-	-	-0.084	1	1	0.0038	0.79	0.05	1.1	0.0014	-1.9	1.2e-11	-2.1	1.6e-13
995	PF00416:Ribosomal protein S13/S18	-	-	-	-	-	-	-	-	GO:0003723,RNA binding; GO:0003735,structural constituent of ribosome; GO:0005622,intracellular; GO:0005840,ribosome; GO:0006412,translation; GO:0003676,nucleic acid binding	-	-	-0.057	1	1	0.051	-0.16	0.91	1.1	0.038	1.1	0.016	-0.14	0.79
996	PF02272:DHHA1 domain; PF07973:Threonyl and Alanyl tRNA synthetase second additional domain; PF01411:tRNA synthetases class II (A)	-	-	-	-	Alanine and aspartate metabolism; Aminoacyl-tRNA biosynthesis	-	-	-	GO:0004813,alanine-tRNA ligase activity; GO:0005524,ATP binding; GO:0005737,cytoplasm; GO:0006412,translation; GO:0006419,alanyl-tRNA aminoacylation; GO:0003676,nucleic acid binding; GO:0016876,ligase activity, forming aminoacyl-tRNA and related compounds; GO:0043039,tRNA aminoacylation	6.1.1.7	-	0.058	1	0.03	0.94	0.22	0.73	-0.028	0.95	0.39	0.14	0.57	0.025
997	-	-	-	-	-	-	-	-	-	-	-	-	0.18	-	0.27	-	-0.15	-	0.086	0.96	0.25	0.83	-0.16	0.89
998	-	-	-	-	-	-	-	-	-	-	-	-	-0.24	1	-0.75	0.4	-1.6	0.12	-0.51	0.6	-0.03	0.98	-0.89	0.22
999	PF01735:Lysophospholipase catalytic domain	-	-	-	S	Phospholipid degradation	-	-	-	GO:0004620,phospholipase activity; GO:0009395,phospholipid catabolic process; GO:0008152,metabolic process; GO:0004622,lysophospholipase activity	3.1.1.5	-	-0.33	1	-0.8	0.17	-0.95	0.21	-0.47	0.45	0.95	0.046	0.8	0.1
1000	PF01735:Lysophospholipase catalytic domain	-	-	-	S	Phospholipid degradation	-	-	-	GO:0004620,phospholipase activity; GO:0009395,phospholipid catabolic process; GO:0008152,metabolic process; GO:0004622,lysophospholipase activity	3.1.1.5	-	-1.3	0.53	-1.2	0.1	0.19	0.93	0.06	0.96	0.94	0.13	2.4	8.9e-05
1001	PF00155:Aminotransferase class I and II	-	-	-	-	Lysine biosynthesis; Caprolactam degradation; Aminophosphonate metabolism; Porphyrin and chlorophyll metabolism	-	-	-	GO:0009058,biosynthetic process; GO:0016847,1-aminocyclopropane-1-carboxylate synthase activity; GO:0016769,transferase activity, transferring nitrogenous groups; GO:0030170,pyridoxal phosphate binding; GO:0018719,6-aminohexanoate transaminase activity; GO:0043746,N2-acetyl-L-lysine aminotransferase activity; GO:0043760,acetyldiaminopimelate aminotransferase activity; GO:0043840,branched-chain am…	2.6.1.-	-	-0.22	0.88	-0.36	0.048	-0.21	0.65	-0.14	0.49	2	4.7e-31	2.1	3.9e-39
1002	PF05768:Glutaredoxin-like domain (DUF836)	-	-	-	-	-	-	-	-	GO:0003676,nucleic acid binding; GO:0008270,zinc ion binding	-	-	-0.069	1	-0.072	0.8	0.069	0.93	-0.0037	0.99	0.58	0.0027	0.72	0.00019
1003	-	-	-	-	S	-	-	-	-	-	-	-	-0.52	1	-3.4	2.5e-08	-0.08	0.97	-2.9	3.3e-06	-4.9	5.6e-19	-1.6	0.0072
1004	PF07690:Major Facilitator Superfamily	-	-	-	-	-	2.A.1.2.35; 2.A.1.2.16	-	-	GO:0005215,transporter activity; GO:0006810,transport; GO:0016021,integral to membrane	-	-	-0.081	1	0.94	0.073	0.57	0.51	1	0.049	-0.59	0.19	-0.96	0.029
1005	-	-	-	-	-	-	-	-	-	-	-	-	-0.01	-	0.21	-	-0.11	-	0.22	0.86	0.2	0.85	-0.12	0.9
1006	PF00075:RNase H; PF01693:Caulimovirus viroplasmin	-	-	-	S	-	-	-	-	GO:0003676,nucleic acid binding; GO:0004523,ribonuclease H activity	3.1.26.4	-	0.15	1	0.0083	0.99	-0.22	0.76	-0.14	0.74	-0.016	0.97	-0.25	0.42
1007	PF13561:Enoyl-(Acyl carrier protein) reductase	-	-	-	-	Fatty acid biosynthesis (path 1)	-	-	-	GO:0008152,metabolic process; GO:0016491,oxidoreductase activity; GO:0003824,catalytic activity; GO:0005488,binding; GO:0004316,3-oxoacyl-[acyl-carrier-protein] reductase activity	1.1.1.100	-	-0.23	1	-0.82	0.36	-0.77	0.61	-0.59	0.53	2.9	1.6e-05	2.9	1.2e-05
1008	-	-	-	-	-	-	-	-	-	-	-	-	0.52	0.94	-1.2	0.011	1.2	0.02	-1.7	0.00012	-1.1	0.0063	1.4	0.00059
1009	PF01163:RIO1 family	-	-	-	S	-	-	-	-	-	-	-	-0.57	0.86	-0.18	0.76	-0.096	0.94	0.38	0.44	-1.2	0.00053	-1.2	0.0018
1010	PF01261:Xylose isomerase-like TIM barrel	-	-	-	-	-	-	-	-	GO:0003677,DNA binding; GO:0004519,endonuclease activity; GO:0005622,intracellular; GO:0006281,DNA repair; GO:0003906,DNA-(apurinic or apyrimidinic site) lyase activity	4.2.99.18	-	0.13	1	0.42	0.12	0.36	0.37	0.29	0.29	0.18	0.45	0.12	0.65
1011	-	-	-	-	-	-	-	-	-	-	-	-	-0.8	0.99	0.88	0.37	-0.87	0.61	1.7	0.065	-2.8	0.00016	-4.6	7.9e-10
1012	PF00637:Region in Clathrin and VPS; PF17122:Zinc-finger; PF12451:Vacuolar protein sorting protein 11 C terminal	-	-	-	-	-	-	-	-	GO:0005515,protein binding; GO:0008270,zinc ion binding; GO:0005488,binding	-	-	0.17	1	-0.034	0.91	0.16	0.74	-0.2	0.42	0.64	0.0007	0.84	8.1e-06
1013	PF10609:NUBPL iron-transfer P-loop NTPase	-	-	-	-	-	3.A.1.132.3	-	-	-	-	-	-0.051	1	0.25	0.4	-0.21	0.7	0.3	0.3	0.36	0.12	-0.099	0.71
1014	-	-	-	-	-	-	-	-	-	GO:0003824,catalytic activity; GO:0005488,binding; GO:0008152,metabolic process	-	-	0.3	1	-0.33	0.58	-0.16	0.92	-0.63	0.25	3.9	7.3e-21	4.1	8.6e-23
1015	PF12697:Alpha/beta hydrolase family	-	-	-	-	-	-	-	-	-	-	-	0.076	1	0.28	0.29	0.34	0.36	0.21	0.45	-1.2	4.2e-09	-1.1	3.6e-08
1016	-	-	-	-	-	-	-	-	-	GO:0003676,nucleic acid binding; GO:0005622,intracellular; GO:0008270,zinc ion binding	-	-	0.069	1	0.12	0.52	0.62	0.00019	0.049	0.82	0.3	0.027	0.8	1.5e-09
1017	PF00651:BTB/POZ domain	-	-	-	S	-	-	-	-	GO:0005515,protein binding	-	-	-0.035	1	-0.032	0.95	-0.19	0.86	0.0024	1	0.48	0.17	0.32	0.38
1018	-	-	-	-	-	-	-	-	-	-	-	-	-0.075	1	0.36	0.39	0.36	0.53	0.43	0.29	-1.7	4.3e-10	-1.7	8.3e-09
1019	-	-	-	-	S	-	-	-	-	GO:0005515,protein binding; GO:0008270,zinc ion binding	-	-	0.033	1	0.31	0.32	0.32	0.48	0.27	0.38	-0.63	0.0051	-0.62	0.01
1020	PF12770:CHAT domain	-	-	-	S	-	-	-	-	-	-	-	-0.23	0.98	0.21	0.46	0.1	0.87	0.44	0.083	-0.95	6.7e-07	-1.1	1.8e-07
1021	PF05049:Interferon-inducible GTPase (IIGP)	-	-	-	-	-	-	-	-	-	-	-	-0.63	0.99	-2	0.0045	0.32	0.87	-1.4	0.059	-3.2	4.4e-08	-0.88	0.16
1022	PF05049:Interferon-inducible GTPase (IIGP)	-	-	-	S	-	-	-	-	-	-	-	0.23	1	0.0056	0.99	0.38	0.57	-0.22	0.63	-1.1	0.00023	-0.77	0.016
1023	-	-	-	-	S	-	-	-	-	-	-	-	0.009	-	-0.19	-	-0.026	-	-0.2	0.88	-0.83	0.31	-0.66	0.44
1024	PF00067:Cytochrome P450	-	CYP32	-	S	-	-	-	-	GO:0004497,monooxygenase activity; GO:0005506,iron ion binding; GO:0006118,electron transport; GO:0020037,heme binding; GO:0005215,transporter activity; GO:0006810,transport; GO:0016020,membrane	-	-	-0.42	-	0.4	-	0.39	-	0.82	0.46	0.73	0.43	0.72	0.46
1025	-	-	-	-	S	-	-	-	-	-	-	-	0.013	1	0.32	0.29	0.15	0.77	0.31	0.31	-5.1	7.3e-153	-5.3	5e-141
1026	PF05719:Golgi phosphoprotein 3 (GPP34)	-	-	-	-	-	-	-	-	-	-	-	-0.06	1	0.025	0.91	0.027	0.96	0.085	0.67	0.21	0.14	0.21	0.14
1027	PF12271:Chitin synthase export chaperone	-	-	-	-	-	-	-	-	-	-	-	0.017	1	-0.35	0.014	-0.36	0.025	-0.37	0.0096	-1.2	1.1e-24	-1.2	3.6e-25
1028	PF00172:Fungal Zn(2)-Cys(6) binuclear cluster domain	TF	-	-	S	-	-	-	-	GO:0003700,transcription factor activity; GO:0005634,nucleus; GO:0006355,regulation of transcription, DNA-dependent; GO:0008270,zinc ion binding	-	-	0.33	0.98	-0.59	0.081	0.81	0.12	-0.93	0.0057	0.49	0.12	1.9	1.9e-09
1029	PF05254:Uncharacterised protein family (UPF0203)	-	-	-	-	-	-	-	-	-	-	-	-0.059	1	-0.052	0.88	-0.28	0.54	0.0063	0.99	0.28	0.21	0.06	0.82
1030	PF12850:Calcineurin-like phosphoesterase superfamily domain	-	-	-	-	-	-	-	-	GO:0016787,hydrolase activity	-	-	-0.12	1	-0.0058	0.98	-0.2	0.57	0.12	0.62	0.43	0.01	0.23	0.18
1031	PF01764:Lipase (class 3)	-	-	-	-	-	-	-	-	-	-	-	1.8	0.034	-0.8	0.23	0.14	0.95	-2.6	6.3e-06	-2.8	4.6e-08	-1.9	0.00037
1032	PF00689:Cation transporting ATPase, C-terminus	-	-	-	-	-	3.A.3.1.7	-	-	GO:0006812,cation transport; GO:0015662,ATPase activity, coupled to transmembrane movement of ions, phosphorylative mechanism; GO:0016020,membrane	-	-	0.1	1	-0.37	0.68	-1	0.28	-0.47	0.58	-5.6	3e-24	-6.2	2.1e-29
1033	-	-	-	-	-	-	-	-	-	-	-	-	-	-	-	-	-	-	-	-	-	-	-	-
1034	-	-	-	-	-	-	-	-	-	-	-	-	-	-	-	-	-	-	-	-	-	-	-	-
1035	PF11807:Domain of unknown function (DUF3328)	-	-	-	S	-	-	-	-	-	-	-	-	-	-	-	-	-	-	-	-	-	-	-
1036	PF11807:Domain of unknown function (DUF3328)	-	-	-	-	-	-	-	-	-	-	-	-	-	-	-	-	-	-	-	-	-	-	-
1037	PF11807:Domain of unknown function (DUF3328)	-	-	-	S	-	-	-	-	-	-	-	-	-	-	-	-	-	-	-	-	-	-	-
1038	PF00583:Acetyltransferase (GNAT) family	-	-	-	-	-	-	-	-	GO:0008080,N-acetyltransferase activity; GO:0008152,metabolic process	-	-	-0.14	1	0.11	0.79	-0.44	0.37	0.24	0.49	0.24	0.41	-0.31	0.27
1039	PF10183:ESSS subunit of NADH:ubiquinone oxidoreductase (complex I)	-	-	-	S	-	3.D.1.6.3	-	-	-	-	-	-0.12	1	0.11	0.84	-0.55	0.42	0.23	0.66	0.99	0.0059	0.32	0.41
1040	PF03144:Elongation factor Tu domain 2; PF03143:Elongation factor Tu C-terminal domain; PF01597:Glycine cleavage H-protein; PF00009:Elongation factor Tu GTP binding domain	-	-	-	-	-	-	-	-	GO:0003924,GTPase activity; GO:0005525,GTP binding; GO:0005960,glycine cleavage complex; GO:0006546,glycine catabolic process; GO:0003746,translation elongation factor activity; GO:0005622,intracellular; GO:0006414,translational elongation	-	-	-0.041	1	0.76	0.075	-0.08	0.95	0.8	0.058	0.7	0.047	-0.13	0.74
1041	PF12998:Inhibitor of growth proteins N-terminal histone-binding; PF04695:Peroxisomal membrane anchor protein (Pex14p) conserved region	-	-	-	S	-	3.A.20.1.1	-	-	GO:0005777,peroxisome; GO:0016020,membrane	-	-	-0.071	1	0.4	0.14	0.2	0.7	0.47	0.076	-0.27	0.24	-0.46	0.039
1042	-	-	-	-	-	-	-	-	-	GO:0005509,calcium ion binding; GO:0005351,sugar:hydrogen symporter activity; GO:0009401,phosphoenolpyruvate-dependent sugar phosphotransferase system	-	-	-0.17	1	-0.79	0.014	-0.27	0.63	-0.62	0.057	-3	1.7e-32	-2.5	6.9e-23
1043	PF01465:GRIP domain	-	-	-	-	-	-	-	-	-	-	-	0.11	1	-0.23	0.18	-0.049	0.92	-0.34	0.039	-0.029	0.86	0.15	0.3
1044	PF01545:Cation efflux family	-	-	-	S	-	2.A.4.2.2	-	-	GO:0006812,cation transport; GO:0008324,cation transmembrane transporter activity; GO:0016020,membrane	-	-	-0.16	1	-0.12	0.6	-0.19	0.58	0.041	0.88	-0.67	2.2e-05	-0.74	2.6e-06
1045	PF01398:JAB1/Mov34/MPN/PAD-1 ubiquitin protease	-	-	-	S	-	-	MER254734	-	-	-	-	-0.15	1	0.23	0.5	-0.11	0.9	0.38	0.24	0.76	0.0029	0.42	0.12
1046	-	-	-	EXPN	S	-	-	-	-	-	-	-	-0.074	1	0.31	0.37	-0.091	0.93	0.38	0.25	-1.4	2e-08	-1.8	4.8e-13
1047	PF12333:Rix1 complex component involved in 60S ribosome maturation	-	-	-	-	-	-	-	-	GO:0005488,binding	-	-	-0.039	1	0.75	0.049	-0.25	0.76	0.79	0.037	0.093	0.8	-0.91	0.0039
1048	PF00150:Cellulase (glycosyl hydrolase family 5)	-	-	GH5_7	S	-	-	-	-	GO:0004798,thymidylate kinase activity; GO:0005524,ATP binding; GO:0006233,dTDP biosynthetic process; GO:0006235,dTTP biosynthetic process; GO:0004553,hydrolase activity, hydrolyzing O-glycosyl compounds; GO:0005975,carbohydrate metabolic process	-	-	0.14	1	-1.9	0.00051	-0.5	0.64	-2	0.00015	-6.4	3.5e-47	-5.1	8.3e-30
1049	PF02221:ML domain; PF00929:Exonuclease	-	-	-	S	-	-	-	-	GO:0004527,exonuclease activity; GO:0005622,intracellular; GO:0003676,nucleic acid binding	-	-	-0.12	1	-0.39	0.095	-0.26	0.49	-0.27	0.27	-1.1	2.2e-09	-0.98	1.4e-07
1050	-	-	-	-	S	-	-	-	-	-	-	-	-0.082	1	-0.01	0.97	0.19	0.54	0.072	0.76	-0.83	1.8e-08	-0.63	2.7e-05
1051	-	-	-	-	-	-	-	-	-	-	-	-	-0.22	0.98	-0.31	0.23	-0.034	0.97	-0.083	0.79	-0.66	0.00075	-0.39	0.058
1052	-	-	-	-	-	-	-	-	-	-	-	-	-0.25	1	-1.1	0.003	-0.11	0.92	-0.81	0.027	-2.1	3.7e-13	-1.2	7.2e-05
1053	PF00107:Zinc-binding dehydrogenase; PF08240:Alcohol dehydrogenase GroES-like domain	-	-	-	-	Bile acid biosynthesis; Tyrosine metabolism; Glycerolipid metabolism; Glycolysis / Gluconeogenesis; Fatty acid metabolism	-	-	-	GO:0008270,zinc ion binding; GO:0016491,oxidoreductase activity; GO:0003824,catalytic activity; GO:0005488,binding; GO:0008152,metabolic process; GO:0004022,alcohol dehydrogenase activity; GO:0004023,alcohol dehydrogenase activity, metal ion-independent; GO:0004024,alcohol dehydrogenase activity, zinc-dependent; GO:0004025,alcohol dehydrogenase activity, iron-dependent	1.1.1.1	-	0.089	1	0.87	0.35	-0.0059	1	0.78	0.41	-1.6	0.028	-2.5	0.00054
1054	PF08450:SMP-30/Gluconolactonase/LRE-like region; PF01196:Ribosomal protein L17; PF00550:Phosphopantetheine attachment site	-	-	-	-	-	-	-	-	GO:0003735,structural constituent of ribosome; GO:0005622,intracellular; GO:0005840,ribosome; GO:0006412,translation; GO:0000036,acyl carrier activity; GO:0006633,fatty acid biosynthetic process; GO:0031177,phosphopantetheine binding; GO:0048037,cofactor binding	-	-	0.012	1	0.62	0.078	-0.42	0.45	0.6	0.08	0.82	0.0042	-0.22	0.48
1055	PF00572:Ribosomal protein L13	-	-	-	-	-	-	-	-	GO:0003735,structural constituent of ribosome; GO:0006412,translation; GO:0015934,large ribosomal subunit; GO:0005622,intracellular; GO:0005840,ribosome	-	-	-0.14	1	0.94	0.1	-0.06	0.97	1.1	0.058	1.6	0.00079	0.56	0.26
1056	PF00013:KH domain; PF00013:KH domain; PF00013:KH domain	-	-	-	-	-	-	-	-	GO:0003723,RNA binding	-	-	-0.0054	1	0.065	0.65	0.16	0.38	0.07	0.62	-0.25	0.013	-0.15	0.15
1057	PF10453:Nuclear fragile X mental retardation-interacting protein 1 (NUFIP1)	-	-	-	S	-	-	-	-	-	-	-	-0.17	1	0.32	0.18	0.27	0.49	0.49	0.032	0.094	0.66	0.045	0.85
1058	PF05193:Peptidase M16 inactive domain	-	-	-	-	-	-	-	-	GO:0004222,metalloendopeptidase activity; GO:0006508,proteolysis; GO:0008270,zinc ion binding; GO:0003824,catalytic activity; GO:0046872,metal ion binding	-	-	0.11	1	-0.036	0.87	0.2	0.45	-0.15	0.42	0.37	0.0069	0.61	6.1e-06
1059	PF00800:Prephenate dehydratase	-	-	-	-	-	-	-	-	GO:0004664,prephenate dehydratase activity; GO:0009094,L-phenylalanine biosynthetic process	-	-	-0.28	0.92	-0.24	0.37	-0.46	0.19	0.04	0.91	1.2	1.2e-08	0.96	2.8e-06
1060	PF00067:Cytochrome P450	-	CYP62	-	S	Tryptophan metabolism; Fatty acid metabolism; gamma-Hexachlorocyclohexane degradation	-	-	-	GO:0004497,monooxygenase activity; GO:0005506,iron ion binding; GO:0006118,electron transport; GO:0020037,heme binding; GO:0050381,unspecific monooxygenase activity	1.14.14.1	-	0.068	1	0.41	0.1	0.084	0.9	0.34	0.17	-2	2.5e-27	-2.3	9.8e-35
1061	PF00098:Zinc knuckle; PF00642:Zinc finger C-x8-C-x5-C-x3-H type (and similar); PF00642:Zinc finger C-x8-C-x5-C-x3-H type (and similar); PF00642:Zinc finger C-x8-C-x5-C-x3-H type (and similar)	-	-	-	-	-	-	-	-	GO:0003676,nucleic acid binding; GO:0008270,zinc ion binding	-	-	-0.23	0.82	0.14	0.45	-0.025	0.96	0.37	0.028	-0.3	0.031	-0.47	0.00082
1062	PF04082:Fungal specific transcription factor domain	TF	-	-	S	-	-	-	-	GO:0003677,DNA binding; GO:0005634,nucleus; GO:0006350,transcription; GO:0008270,zinc ion binding	-	-	0.2	0.99	0.35	0.14	1	2.8e-06	0.15	0.57	-2.3	8.2e-39	-1.6	5.6e-20
1063	PF01894:Uncharacterised protein family UPF0047	-	-	-	-	-	-	-	-	-	-	-	-0.2	1	0.049	0.93	-0.46	0.5	0.25	0.63	-2.1	5.9e-10	-2.6	2.1e-14
1064	-	-	-	-	-	-	-	-	-	-	-	-	-0.26	0.94	0.47	0.05	-0.00038	1	0.73	0.0012	0.73	0.00021	0.25	0.23
1065	PF00621:RhoGEF domain	-	-	-	-	-	-	-	-	GO:0005089,Rho guanyl-nucleotide exchange factor activity; GO:0005622,intracellular; GO:0035023,regulation of Rho protein signal transduction	-	-	0.089	1	-0.13	0.73	0.12	0.9	-0.22	0.54	0.25	0.38	0.5	0.068
1066	PF03372:Endonuclease/Exonuclease/phosphatase family	-	-	-	-	-	-	-	-	-	-	-	-0.0055	1	0.27	0.093	-0.056	0.9	0.28	0.083	0.17	0.21	-0.16	0.28
1067	PF00071:Ras family	-	-	-	-	-	9.A.50.1.1	-	-	GO:0005525,GTP binding; GO:0007264,small GTPase mediated signal transduction; GO:0005622,intracellular; GO:0015031,protein transport	-	-	-0.076	1	-0.24	0.063	-0.11	0.64	-0.16	0.22	-0.53	1.4e-07	-0.41	7.1e-05
1068	PF00300:Histidine phosphatase superfamily (branch 1)	-	-	-	-	Glycolysis / Gluconeogenesis	-	-	-	GO:0004619,phosphoglycerate mutase activity; GO:0046537,2,3-bisphosphoglycerate-independent phosphoglycerate mutase activity; GO:0046538,2,3-bisphosphoglycerate-dependent phosphoglycerate mutase activity	5.4.2.1	-	-0.26	0.85	-0.18	0.42	0.19	0.61	0.081	0.75	-0.28	0.096	0.082	0.66
1069	-	-	-	-	-	-	-	-	-	-	-	-	-0.085	1	0.46	0.22	0.37	0.55	0.54	0.14	0.37	0.24	0.28	0.38
1070	-	-	-	-	-	-	-	-	-	-	-	-	0.31	0.98	0.55	0.1	0.0087	0.99	0.24	0.52	0.69	0.013	0.14	0.65
1071	PF00153:Mitochondrial carrier protein; PF00153:Mitochondrial carrier protein; PF00153:Mitochondrial carrier protein	-	-	-	S	-	2.A.29.29.1	-	-	GO:0005488,binding; GO:0006810,transport; GO:0016020,membrane	-	-	-0.00044	1	0.18	0.44	0.033	0.96	0.18	0.44	0.41	0.016	0.27	0.13
1072	PF04117:Mpv17 / PMP22 family	-	-	-	S	-	-	-	-	-	-	-	0.022	1	0.25	0.21	-0.14	0.74	0.23	0.26	0.28	0.091	-0.11	0.54
1073	PF12739:ER-Golgi trafficking TRAPP I complex 85 kDa subunit	-	-	-	-	-	-	-	-	-	-	-	0.096	1	0.16	0.46	0.32	0.25	0.067	0.79	0.12	0.52	0.28	0.11
1074	-	-	-	-	-	-	-	-	-	GO:0005515,protein binding	-	-	-0.12	1	-0.0083	0.98	0.12	0.8	0.11	0.67	-0.99	5.4e-09	-0.86	4.8e-07
1075	PF03815:LCCL domain	-	-	-	-	-	-	-	-	-	-	-	0.13	1	-0.29	0.47	0.069	0.96	-0.42	0.28	1.1	0.00047	1.4	2.2e-06
1076	-	-	-	-	-	-	-	-	-	GO:0005488,binding	-	-	-0.036	1	-0.052	0.86	0.12	0.83	-0.016	0.97	-1.6	5.6e-19	-1.4	2.7e-15
1077	-	-	-	-	S	-	-	-	-	-	-	-	-0.02	1	-0.12	0.76	-0.15	0.85	-0.095	0.81	-0.1	0.72	-0.13	0.64
1078	PF06775:Putative adipose-regulatory protein (Seipin)	-	-	-	S	-	-	-	-	-	-	-	-0.03	1	0.21	0.43	0.12	0.85	0.24	0.36	-0.47	0.018	-0.57	0.0048
1079	PF04908:SH3-binding, glutamic acid-rich protein	-	-	-	-	-	-	-	-	-	-	-	0.16	0.98	0.016	0.94	-0.16	0.62	-0.14	0.44	0.47	0.00077	0.29	0.041
1080	PF00171:Aldehyde dehydrogenase family	-	-	-	S	Propanoate metabolism; Inositol metabolism; Valine, leucine and isoleucine degradation	-	-	-	GO:0004491,methylmalonate-semialdehyde dehydrogenase (acylating) activity; GO:0006573,valine metabolic process; GO:0008152,metabolic process; GO:0016491,oxidoreductase activity	1.2.1.27	-	0.13	1	-0.4	0.07	-0.2	0.62	-0.53	0.015	0.072	0.73	0.27	0.15
1081	PF01451:Low molecular weight phosphotyrosine protein phosphatase	-	-	-	-	-	-	-	-	GO:0004725,protein tyrosine phosphatase activity; GO:0006470,protein amino acid dephosphorylation	-	-	-0.095	1	-0.54	0.097	-0.5	0.26	-0.45	0.18	-0.95	0.0003	-0.9	0.00058
1082	-	-	-	-	S	-	-	-	-	-	-	-	-0.29	1	0.0095	0.99	-0.16	0.9	0.3	0.56	-1.3	0.0003	-1.5	4.9e-05
1083	PF00996:GDP dissociation inhibitor	-	-	-	-	-	-	-	-	GO:0005093,Rab GDP-dissociation inhibitor activity; GO:0015031,protein transport; GO:0043087,regulation of GTPase activity	-	-	0.093	1	-0.31	0.034	-0.077	0.82	-0.4	0.0044	-0.23	0.056	-0.0049	0.98
1084	PF12234:RAVE protein 1 C terminal	-	-	-	S	-	-	-	-	-	-	-	0.054	1	0.21	0.44	0.34	0.4	0.16	0.58	0.73	0.00044	0.85	4.6e-05
1085	PF02469:Fasciclin domain; PF02469:Fasciclin domain; PF02469:Fasciclin domain; PF02469:Fasciclin domain; PF02469:Fasciclin domain	-	-	-	S	-	-	-	-	-	-	-	-0.018	1	-0.079	0.81	0.31	0.46	-0.061	0.87	0.58	0.0068	0.98	3.8e-06
1086	PF00153:Mitochondrial carrier protein; PF00153:Mitochondrial carrier protein; PF00153:Mitochondrial carrier protein	-	-	-	-	-	2.A.29.8.1	-	-	GO:0005488,binding; GO:0006810,transport; GO:0016020,membrane; GO:0005215,transporter activity; GO:0005743,mitochondrial inner membrane	-	-	0.21	0.98	-0.34	0.14	-0.42	0.13	-0.56	0.012	-1.7	2.3e-21	-1.8	2.1e-23
1087	-	-	-	-	-	-	-	-	-	-	-	-	-0.068	1	0.43	0.048	-0.031	0.96	0.5	0.019	-1.3	2e-15	-1.7	4.9e-25
1088	PF04768:NAT, N-acetyltransferase, of N-acetylglutamate synthase; PF04768:NAT, N-acetyltransferase, of N-acetylglutamate synthase	-	-	-	-	Urea cycle and metabolism of amino groups	-	-	-	GO:0003991,acetylglutamate kinase activity; GO:0006526,arginine biosynthetic process; GO:0004042,amino-acid N-acetyltransferase activity	2.3.1.1	-	-0.2	1	0.5	0.38	-0.89	0.21	0.71	0.19	0.11	0.83	-1.3	0.0032
1089	-	-	-	-	S	-	-	-	-	-	-	-	0.018	1	-0.16	0.51	0.24	0.54	-0.18	0.46	0.052	0.81	0.45	0.016
1090	PF00179:Ubiquitin-conjugating enzyme	-	-	-	-	-	-	-	-	GO:0019787,small conjugating protein ligase activity; GO:0043687,post-translational protein modification; GO:0051246,regulation of protein metabolic process	-	-	0.19	0.91	0.0044	0.99	0.29	0.22	-0.18	0.3	0.81	2e-09	1.1	5.1e-16
1091	PF03935:Beta-glucan synthesis-associated protein (SKN1)	-	-	GH16	-	-	-	-	-	-	-	-	-0.33	0.96	-0.73	0.023	-0.063	0.95	-0.4	0.24	-1.5	3.3e-09	-0.88	0.001
1092	-	-	-	-	-	-	-	-	-	-	-	-	-0.32	0.9	0.2	0.52	0.037	0.97	0.52	0.058	0.18	0.47	0.016	0.96
1093	PF09779:Ima1 N-terminal domain	-	-	-	-	-	-	-	-	-	-	-	-0.065	1	-0.071	0.73	-0.066	0.89	-0.006	0.98	-0.54	7.6e-05	-0.54	9.7e-05
1094	PF08801:Nup133 N terminal like; PF03177:Non-repetitive/WGA-negative nucleoporin C-terminal	-	-	-	-	-	9.A.14.1.1	-	-	GO:0000166,nucleotide binding; GO:0004812,aminoacyl-tRNA ligase activity; GO:0005524,ATP binding; GO:0005737,cytoplasm; GO:0006412,translation; GO:0006418,tRNA aminoacylation for protein translation; GO:0005643,nuclear pore; GO:0006913,nucleocytoplasmic transport; GO:0017056,structural constituent of nuclear pore	-	-	-0.13	1	0.35	0.25	0.15	0.82	0.48	0.097	0.41	0.09	0.22	0.39
1095	PF14622:Ribonuclease-III-like	-	-	-	-	-	-	-	-	GO:0003723,RNA binding; GO:0004525,ribonuclease III activity; GO:0006396,RNA processing	-	-	-0.13	1	-0.12	0.55	-0.12	0.75	0.013	0.96	-0.47	0.00089	-0.47	0.0011
1096	PF02301:HORMA domain	-	-	-	-	-	-	-	-	GO:0007067,mitosis	-	-	0.25	1	1.3	0.0018	-0.098	0.95	1.1	0.013	1.1	0.0043	-0.38	0.34
1097	PF08030:Ferric reductase NAD binding domain; PF01794:Ferric reductase like transmembrane component; PF08022:FAD-binding domain	-	-	-	S	-	5.B.1.1.1	-	-	GO:0006118,electron transport; GO:0016020,membrane; GO:0016491,oxidoreductase activity; GO:0005506,iron ion binding; GO:0016021,integral to membrane; GO:0050660,FAD binding	-	Fenton	0.27	0.98	0.27	0.36	-0.22	0.68	0.0084	0.99	-0.46	0.047	-0.95	2e-05
1098	PF00400:WD domain, G-beta repeat; PF00400:WD domain, G-beta repeat; PF00400:WD domain, G-beta repeat; PF00400:WD domain, G-beta repeat; PF04494:WD40 associated region in TFIID subunit, NTD2 domain	-	-	-	-	-	-	-	-	GO:0005634,nucleus; GO:0030528,transcription regulator activity; GO:0045449,regulation of transcription	-	-	0.048	1	0.12	0.62	0.32	0.31	0.071	0.79	0.91	7.1e-08	1.1	7e-11
1099	-	-	-	-	-	-	-	-	-	-	-	-	-0.2	1	-0.32	0.21	-0.057	0.94	-0.12	0.69	-0.14	0.51	0.12	0.61
1100	-	-	-	-	-	-	-	-	-	-	-	-	-0.0032	1	-0.16	0.52	0.011	0.99	-0.15	0.54	2.5	3e-38	2.7	2e-44
1101	PF00173:Cytochrome b5-like Heme/Steroid binding domain; PF00487:Fatty acid desaturase	-	-	-	-	-	-	-	-	GO:0020037,heme binding; GO:0046914,transition metal ion binding; GO:0016491,oxidoreductase activity; GO:0006629,lipid metabolic process; GO:0016020,membrane; GO:0016717,oxidoreductase activity, acting on paired donors, with oxidation of a pair of donors resulting in the reduction of molecular oxygen to two molecules of water; GO:0005506,iron ion binding; GO:0006633,fatty acid biosynthetic proces…	1.14.19.3	-	-0.054	1	-0.033	0.9	-0.064	0.91	0.021	0.94	0.43	0.0089	0.39	0.016
1102	PF01294:Ribosomal protein L13e	-	-	-	S	-	-	-	-	GO:0003735,structural constituent of ribosome; GO:0005622,intracellular; GO:0005840,ribosome; GO:0006412,translation	-	-	-0.027	1	1.1	0.069	-0.052	0.98	1.1	0.06	2.1	1.4e-05	0.93	0.06
1103	PF01717:Cobalamin-independent synthase, Catalytic domain	-	-	-	-	-	-	-	-	GO:0003871,5-methyltetrahydropteroyltriglutamate-homocysteine S-methyltransferase activity; GO:0009086,methionine biosynthetic process	-	-	-0.064	1	0.44	0.24	0.28	0.65	0.51	0.17	-1.9	1.6e-12	-2.1	1.6e-13
1104	-	-	-	-	-	-	-	-	-	-	-	-	-0.34	0.9	0.42	0.19	0.28	0.58	0.76	0.011	-0.84	0.00036	-0.98	9.4e-05
1105	-	-	-	-	-	-	-	-	-	-	-	-	-0.49	0.2	-0.03	0.92	-0.26	0.49	0.46	0.034	0.42	0.024	0.19	0.33
1106	PF00810:ER lumen protein retaining receptor; PF03388:Legume-like lectin family	-	-	-	S	-	-	-	-	GO:0006621,protein retention in ER; GO:0016021,integral to membrane; GO:0046923,ER retention sequence binding; GO:0016020,membrane	-	-	0.018	1	0.034	0.81	-0.18	0.26	0.016	0.92	-0.18	0.067	-0.39	2.7e-05
1107	PF00226:DnaJ domain	-	-	-	S	-	-	-	-	GO:0031072,heat shock protein binding; GO:0006457,protein folding; GO:0051082,unfolded protein binding	-	-	-0.091	1	0.37	0.14	0.44	0.17	0.46	0.061	-1.1	4.9e-08	-1	4.3e-07
1108	PF01086:Clathrin light chain	-	-	-	-	-	-	-	-	GO:0005198,structural molecule activity; GO:0005515,protein binding; GO:0006461,protein complex assembly; GO:0006886,intracellular protein transport; GO:0008565,protein transporter activity; GO:0016192,vesicle-mediated transport; GO:0030130,clathrin coat of trans-Golgi network vesicle; GO:0030132,clathrin coat of coated pit	-	-	-0.12	1	0.34	0.19	-0.043	0.96	0.46	0.063	0.19	0.39	-0.19	0.4
1109	-	-	-	-	-	-	-	-	-	GO:0005515,protein binding	-	-	-0.033	1	-0.29	0.52	-0.22	0.81	-0.26	0.58	-0.7	0.039	-0.63	0.067
1110	PF00648:Calpain family cysteine protease	-	-	-	-	-	-	-	-	GO:0004198,calcium-dependent cysteine-type endopeptidase activity; GO:0005622,intracellular; GO:0006508,proteolysis; GO:0004197,cysteine-type endopeptidase activity	3.4.22.-	-	0.33	0.79	0.38	0.12	0.96	3.4e-05	0.046	0.89	-0.18	0.37	0.4	0.048
1111	PF17184:Rit1 N-terminal domain; PF04179:Rit1 DUSP-like domain	-	-	-	-	-	-	-	-	GO:0016763,transferase activity, transferring pentosyl groups; GO:0000107,imidazoleglycerol-phosphate synthase activity; GO:0018071,NAD(P)-cysteine ADP-ribosyltransferase activity; GO:0018121,NAD(P)-asparagine ADP-ribosyltransferase activity; GO:0018127,NAD(P)-serine ADP-ribosyltransferase activity; GO:0043867,7-cyano-7-deazaguanine tRNA-ribosyltransferase activity	2.4.2.-	-	-0.091	1	-0.36	0.16	-0.34	0.37	-0.27	0.31	0.086	0.72	0.11	0.66
1112	-	-	-	-	-	-	-	-	-	-	-	-	-0.16	0.96	0.49	0.0023	0.32	0.12	0.65	2.2e-05	-0.47	0.00036	-0.64	3e-06
1113	PF13886:Domain of unknown function (DUF4203)	-	-	-	S	-	-	-	-	-	-	-	-0.18	1	0.78	0.1	-0.26	0.81	0.96	0.041	-0.53	0.19	-1.6	4.2e-05
1114	PF01494:FAD binding domain	-	-	-	S	gamma-Hexachlorocyclohexane degradation; Toluene and xylene degradation; Nitorobenzene degradation	-	-	-	GO:0004497,monooxygenase activity; GO:0006118,electron transport; GO:0006725,aromatic compound metabolic process; GO:0008152,metabolic process; GO:0016491,oxidoreductase activity; GO:0018662,phenol 2-monooxygenase activity	1.14.13.7	Fenton	-1.3	0.68	0.14	0.9	-0.21	0.94	1.4	0.083	2.5	0.00016	2.1	0.0013
1115	PF01494:FAD binding domain	-	-	-	S	gamma-Hexachlorocyclohexane degradation; Toluene and xylene degradation; Nitorobenzene degradation	-	-	-	GO:0004497,monooxygenase activity; GO:0006118,electron transport; GO:0006725,aromatic compound metabolic process; GO:0008152,metabolic process; GO:0016491,oxidoreductase activity; GO:0018662,phenol 2-monooxygenase activity	1.14.13.7	Fenton	0.93	0.71	2	0.00048	-0.97	0.26	1.1	0.08	4.1	1.8e-17	1.2	0.022
1116	PF03568:Peptidase family C50	-	-	-	-	-	-	MER277157	-	GO:0005634,nucleus; GO:0006508,proteolysis; GO:0008233,peptidase activity	3.4.22.49	-	7.4e-05	1	0.32	0.062	0.12	0.73	0.32	0.061	-0.15	0.31	-0.35	0.017
1117	PF09748:Transcription factor subunit Med10 of Mediator complex; PF10165:Guanine nucleotide exchange factor synembryn	-	-	-	S	-	-	-	-	-	-	-	-0.082	1	-0.35	0.078	-0.21	0.54	-0.26	0.19	-0.25	0.13	-0.11	0.53
1118	PF00076:RNA recognition motif. (a.k.a. RRM, RBD, or RNP domain); PF00076:RNA recognition motif. (a.k.a. RRM, RBD, or RNP domain)	-	-	-	-	-	-	-	-	GO:0003676,nucleic acid binding	-	-	-0.083	1	1.6	0.011	0.053	0.98	1.6	0.0074	2.8	5.5e-08	1.2	0.018
1119	PF00996:GDP dissociation inhibitor	-	-	-	-	-	-	-	-	GO:0043087,regulation of GTPase activity	-	-	-0.1	1	-0.38	0.13	-0.19	0.7	-0.28	0.29	-0.1	0.66	0.087	0.71
1120	-	-	-	-	-	-	-	-	-	-	-	-	-0.19	1	-0.87	0.075	-0.5	0.48	-0.69	0.16	-2.9	5.4e-15	-2.5	4e-12
1121	-	-	-	-	S	-	-	-	-	-	-	-	-	-	-	-	-	-	-	-	-	-	-	-
1122	-	-	-	-	-	-	-	-	-	-	-	-	-	-	-	-	-	-	-	-	-	-	-	-
1123	-	-	-	-	-	-	-	-	-	GO:0004182,carboxypeptidase A activity; GO:0006508,proteolysis; GO:0008270,zinc ion binding	-	-	-	-	-	-	-	-	-	-	-	-	-	-
1124	-	-	-	-	-	-	-	-	-	-	-	-	-	-	-	-	-	-	-	-	-	-	-	-
1125	-	-	-	-	-	-	-	-	-	-	-	-	1	-	0.56	-	-0.23	-	-0.46	0.79	0.83	0.54	0.042	0.98
1126	-	-	-	-	S	-	-	-	-	-	-	-	0.59	-	-0.011	0.99	-0.57	-	-0.6	0.36	0.13	0.82	-0.43	0.41
1127	PF06738:Putative threonine/serine exporter	-	-	-	-	-	-	-	-	-	-	-	-0.63	0.88	-0.11	0.87	1.1	0.089	0.52	0.34	-2.1	1.9e-07	-0.96	0.024
1128	-	-	-	-	-	-	-	-	-	-	-	-	0.34	1	0.9	0.062	0.85	0.18	0.56	0.27	-0.093	0.83	-0.15	0.76
1129	PF17284:Spermidine synthase tetramerisation domain; PF01564:Spermine/spermidine synthase domain; PF03435:Saccharopine dehydrogenase NADP binding domain; PF16653:Saccharopine dehydrogenase C-terminal domain	-	-	-	-	Urea cycle and metabolism of amino groups; beta-Alanine metabolism; Arginine and proline metabolism	-	-	-	GO:0003824,catalytic activity; GO:0005488,binding; GO:0008152,metabolic process; GO:0004766,spermidine synthase activity	2.5.1.16	-	-0.14	1	0.3	0.47	0.037	0.98	0.44	0.26	2	8.8e-12	1.8	3.2e-09
1130	PF00432:Prenyltransferase and squalene oxidase repeat; PF00432:Prenyltransferase and squalene oxidase repeat; PF00432:Prenyltransferase and squalene oxidase repeat; PF00432:Prenyltransferase and squalene oxidase repeat	-	-	-	-	-	-	-	-	GO:0003824,catalytic activity; GO:0004659,prenyltransferase activity; GO:0004661,protein geranylgeranyltransferase activity; GO:0008318,protein prenyltransferase activity; GO:0008412,4-hydroxybenzoate octaprenyltransferase activity; GO:0008495,protoheme IX farnesyltransferase activity; GO:0043766,Sep-tRNA:Cys-tRNA synthase activity; GO:0043888,(S)-2,3-di-O-geranylgeranylglyceryl phosphate synthas…	2.5.1.-	-	0.078	1	-0.57	0.0065	0.13	0.79	-0.65	0.0016	-0.43	0.017	0.27	0.14
1131	PF12937:F-box-like	-	-	-	-	-	-	-	-	-	-	-	-0.74	0.92	0.14	0.87	-0.42	-	0.88	0.21	0.01	0.99	-0.55	0.38
1132	PF12937:F-box-like	-	-	-	-	-	-	-	-	-	-	-	0.1	1	-0.48	0.08	0.019	0.98	-0.58	0.032	-0.045	0.87	0.46	0.051
1133	PF08240:Alcohol dehydrogenase GroES-like domain; PF00107:Zinc-binding dehydrogenase	-	-	-	-	Bile acid biosynthesis; Tyrosine metabolism; Glycerolipid metabolism; Glycolysis / Gluconeogenesis; Fatty acid metabolism	-	-	-	GO:0003824,catalytic activity; GO:0005488,binding; GO:0008152,metabolic process; GO:0004022,alcohol dehydrogenase activity; GO:0004023,alcohol dehydrogenase activity, metal ion-independent; GO:0004024,alcohol dehydrogenase activity, zinc-dependent; GO:0004025,alcohol dehydrogenase activity, iron-dependent	1.1.1.1	-	1.4	0.68	2.3	0.0069	-0.11	0.97	0.94	0.31	5.6	3.1e-14	3.2	1.4e-05
1134	-	-	-	-	S	-	-	-	-	-	-	-	0.04	1	0.55	0.21	-0.13	0.92	0.51	0.25	0.49	0.18	-0.2	0.63
1135	PF00743:Flavin-binding monooxygenase-like; PF13450:NAD(P)-binding Rossmann-like domain	-	-	-	-	-	-	-	-	GO:0016491,oxidoreductase activity; GO:0050660,FAD binding; GO:0004497,monooxygenase activity; GO:0006118,electron transport; GO:0006725,aromatic compound metabolic process; GO:0004499,flavin-containing monooxygenase activity	1.14.13.8	-	0.83	0.31	0.73	0.074	-0.23	0.83	-0.1	0.85	2.4	2.7e-13	1.5	1.1e-05
1136	PF03992:Antibiotic biosynthesis monooxygenase	-	-	-	S	-	-	-	-	GO:0005737,cytoplasm; GO:0016491,oxidoreductase activity; GO:0017000,antibiotic biosynthetic process	-	-	0.023	1	1.2	0.016	-0.52	0.57	1.2	0.017	-0.71	0.11	-2.5	3.1e-09
1137	-	-	-	-	-	-	-	-	-	GO:0042781,3'-tRNA processing endoribonuclease activity	3.1.26.11	-	0.12	1	0.34	0.16	0.17	0.71	0.22	0.39	-1	1.6e-08	-1.2	2.2e-10
1138	PF00083:Sugar (and other) transporter	-	-	-	S	Pentose and glucuronate interconversions	2.A.1.1.73	-	-	GO:0005351,sugar:hydrogen symporter activity; GO:0008643,carbohydrate transport; GO:0016020,membrane; GO:0005215,transporter activity; GO:0006810,transport; GO:0016021,integral to membrane; GO:0008733,L-arabinose isomerase activity	5.3.1.4	-	0.31	1	-1.1	0.15	-0.53	0.73	-1.4	0.057	-0.32	0.64	0.25	0.72
1139	PF01035:6-O-methylguanine DNA methyltransferase, DNA binding domain	-	-	-	-	-	-	-	-	GO:0003824,catalytic activity; GO:0006281,DNA repair	-	-	-0.28	0.81	0.3	0.17	-0.14	0.77	0.58	0.0044	-0.14	0.47	-0.57	0.0011
1140	PF06985:Heterokaryon incompatibility protein (HET)	-	-	-	-	-	-	-	-	-	-	-	0.15	1	0.14	0.73	0.16	0.86	-0.0085	0.99	0.12	0.69	0.14	0.66
1141	PF00503:G-protein alpha subunit	-	-	-	-	-	-	-	-	GO:0004871,signal transducer activity; GO:0007186,G-protein coupled receptor protein signaling pathway; GO:0019001,guanyl nucleotide binding; GO:0007165,signal transduction	-	-	0.092	1	-0.1	0.8	0.74	0.044	-0.19	0.61	-0.59	0.026	0.25	0.38
1142	PF03069:Acetamidase/Formamidase family; PF03069:Acetamidase/Formamidase family	-	-	-	-	Glyoxylate and dicarboxylate metabolism; Nitrogen metabolism; Tryptophan metabolism	-	-	-	GO:0008152,metabolic process; GO:0016811,hydrolase activity, acting on carbon-nitrogen (but not peptide) bonds, in linear amides; GO:0004328,formamidase activity	3.5.1.49	-	-0.12	1	0.6	0.032	0.19	0.77	0.72	0.0086	2.2	4.4e-22	1.8	8e-15
1143	-	-	-	-	S	-	-	-	-	-	-	-	-0.43	1	0.15	0.86	-0.17	-	0.59	0.45	-1.8	0.00097	-2.1	0.00021
1144	PF02747:Proliferating cell nuclear antigen, C-terminal domain; PF02747:Proliferating cell nuclear antigen, C-terminal domain; PF00705:Proliferating cell nuclear antigen, N-terminal domain	-	-	-	S	Purine metabolism; DNA polymerase; Pyrimidine metabolism	-	-	-	GO:0003677,DNA binding; GO:0006275,regulation of DNA replication; GO:0030337,DNA polymerase processivity factor activity; GO:0043626,PCNA complex; GO:0003887,DNA-directed DNA polymerase activity; GO:0034061,DNA polymerase activity	2.7.7.7	-	0.16	1	1.4	0.00064	0.17	0.88	1.2	0.0033	0.43	0.23	-0.75	0.035
1145	-	-	-	-	-	Starch and sucrose metabolism	-	-	-	GO:0004339,glucan 1,4-alpha-glucosidase activity	3.2.1.3	-	-0.16	0.94	-0.26	0.079	0.066	0.87	-0.099	0.55	0.28	0.023	0.6	4.3e-07
1146	PF01026:TatD related DNase	-	-	-	S	-	-	-	-	GO:0016888,endodeoxyribonuclease activity, producing 5'-phosphomonoesters	3.1.21.-	-	-0.29	0.83	0.17	0.49	-0.055	0.94	0.46	0.033	0.58	0.0012	0.36	0.054
1147	-	-	-	-	-	-	-	-	-	-	-	-	0.3	1	0.022	0.97	0.062	0.96	-0.28	0.71	-2.8	1.3e-13	-2.8	1.2e-11
1148	-	-	-	-	S	-	-	-	-	-	-	-	-0.11	1	0.65	0.3	-0.63	0.54	0.76	0.21	-3.1	2.9e-11	-4.4	3.5e-21
1149	PF00067:Cytochrome P450	-	CYP67	-	S	Tryptophan metabolism; Fatty acid metabolism; gamma-Hexachlorocyclohexane degradation	-	-	-	GO:0004497,monooxygenase activity; GO:0005506,iron ion binding; GO:0006118,electron transport; GO:0020037,heme binding; GO:0050381,unspecific monooxygenase activity	1.14.14.1	-	0.66	0.98	1.6	0.018	0.0011	1	0.97	0.18	1.4	0.018	-0.26	0.7
1150	-	-	-	-	S	-	-	-	-	-	-	-	0.16	-	1.1	0.15	-0.3	-	0.97	0.21	-1.8	0.00016	-3.2	2.5e-07
1151	PF05199:GMC oxidoreductase; PF00732:GMC oxidoreductase	-	-	AA3_2	-	Glycine, serine and threonine metabolism	-	-	-	GO:0016614,oxidoreductase activity, acting on CH-OH group of donors; GO:0050660,FAD binding; GO:0006066,alcohol metabolic process; GO:0008812,choline dehydrogenase activity	1.1.99.1	Fenton	-0.17	1	-0.21	0.68	-0.016	0.99	-0.042	0.95	-1.4	5.2e-05	-1.2	0.00056
1152	-	-	-	-	S	-	2.A.1.2.16	-	-	-	-	-	-1.2	0.11	-1.8	3.9e-05	-0.72	0.23	-0.59	0.21	-2.9	4.9e-15	-1.8	3.5e-07
1153	-	-	-	-	-	-	2.A.1.2.2	-	-	-	-	-	-1.3	0.047	-2.2	4.4e-07	-0.43	0.61	-0.84	0.076	-2.6	1.6e-11	-0.86	0.03
1154	PF05199:GMC oxidoreductase; PF00732:GMC oxidoreductase	-	-	AA3_2	-	Glycine, serine and threonine metabolism	-	-	-	GO:0016614,oxidoreductase activity, acting on CH-OH group of donors; GO:0050660,FAD binding; GO:0006066,alcohol metabolic process; GO:0008812,choline dehydrogenase activity	1.1.99.1	Fenton	-0.54	0.74	-1.3	5.2e-05	0.45	0.45	-0.8	0.023	-0.2	0.55	1.6	6.2e-08
1155	PF07859:alpha/beta hydrolase fold	-	-	-	S	-	-	MER209311	-	GO:0008152,metabolic process; GO:0016787,hydrolase activity	-	-	-0.33	1	-0.18	0.79	-0.21	0.89	0.16	0.82	0.14	0.79	0.11	0.84
1156	-	-	-	-	S	-	-	-	-	-	-	-	-0.53	0.78	0.39	0.32	-0.96	0.02	0.92	0.011	-1.6	8.7e-08	-2.9	6.9e-24
1157	PF00109:Beta-ketoacyl synthase, N-terminal domain; PF00550:Phosphopantetheine attachment site; PF16197:Ketoacyl-synthetase C-terminal extension; PF08659:KR domain; PF07993:Male sterility protein; PF14765:Polyketide synthase dehydratase; PF02801:Beta-ketoacyl synthase, C-terminal domain; PF00698:Acyl transferase domain	-	-	-	S	-	-	-	PKS	GO:0031177,phosphopantetheine binding; GO:0048037,cofactor binding; GO:0008152,metabolic process; GO:0003824,catalytic activity; GO:0005488,binding	-	-	0.06	1	0.1	0.69	-0.17	0.68	0.042	0.89	-0.7	5.1e-05	-0.97	1.6e-08
1158	-	-	-	-	-	-	-	-	-	-	-	-	0.1	-	-0.028	1	-0.096	-	-0.13	0.94	-2.6	3.8e-05	-2.7	7.8e-05
1159	-	-	-	-	S	-	-	-	-	-	-	-	-0.36	0.96	-0.61	0.09	-0.89	0.028	-0.25	0.53	-1.6	1.2e-08	-1.9	2.1e-11
1160	-	-	-	-	-	-	-	-	-	GO:0003824,catalytic activity; GO:0005488,binding; GO:0008152,metabolic process	-	-	0.13	1	0.12	0.66	-0.4	0.16	-0.0086	0.98	-1.8	1.8e-24	-2.3	1.3e-38
1161	-	-	-	-	-	-	-	-	-	-	-	-	-0.2	1	0.092	0.88	0.2	0.82	0.29	0.6	-2	1.5e-09	-1.9	1.8e-07
1162	PF00067:Cytochrome P450	-	CYP62	-	S	gamma-Hexachlorocyclohexane degradation; Ascorbate and aldarate metabolism; Flavonoids, stilbene and lignin biosynthesis; Fluorene degradation	-	-	-	GO:0004497,monooxygenase activity; GO:0005506,iron ion binding; GO:0006118,electron transport; GO:0020037,heme binding; GO:0018585,fluorene oxygenase activity; GO:0018586,mono-butyltin dioxygenase activity; GO:0018587,limonene 8-monooxygenase activity; GO:0018588,tri-n-butyltin dioxygenase activity; GO:0018589,di-n-butyltin dioxygenase activity; GO:0018590,methylsilanetriol hydroxylase activity; …	1.14.-.-	-	-0.18	0.96	-0.22	0.24	-0.29	0.21	-0.04	0.87	-1.7	2.1e-36	-1.8	1.6e-39
1163	PF17990:L-Lysine epsilon oxidase N-terminal; PF18417:L-lysine epsilon oxidase C-terminal domain	-	-	-	-	-	-	-	-	-	-	-	-0.3	1	-0.75	0.52	0.051	0.99	-0.45	0.72	6.2	3e-15	7	5e-19
1164	PF12902:Ferritin-like	-	-	-	-	-	-	-	-	-	-	-	-0.22	1	-0.74	0.36	0.029	0.99	-0.53	0.54	5.6	7.5e-21	6.3	1e-26
1165	PF04820:Tryptophan halogenase; PF00890:FAD binding domain	-	-	-	-	-	-	-	-	GO:0008152,metabolic process; GO:0016491,oxidoreductase activity	-	-	-0.16	1	-0.64	0.11	-0.052	0.97	-0.48	0.25	0.33	0.35	0.92	0.0058
1166	-	-	-	-	S	-	-	-	-	-	-	-	0.75	0.94	-0.64	0.38	-0.71	0.54	-1.4	0.037	-2.6	1.3e-06	-2.7	6.8e-07
1167	PF13738:Pyridine nucleotide-disulphide oxidoreductase	-	-	-	S	-	-	-	-	GO:0016491,oxidoreductase activity; GO:0050660,FAD binding; GO:0004499,flavin-containing monooxygenase activity	1.14.13.8	-	0.39	1	0.11	0.89	-0.96	0.22	-0.28	0.69	0.21	0.7	-0.86	0.083
1168	PF05199:GMC oxidoreductase; PF00732:GMC oxidoreductase	-	-	AA3_2	-	Glycine, serine and threonine metabolism	-	-	-	GO:0016614,oxidoreductase activity, acting on CH-OH group of donors; GO:0050660,FAD binding; GO:0006066,alcohol metabolic process; GO:0008812,choline dehydrogenase activity	1.1.99.1	Fenton	-0.03	1	0.36	0.45	-0.39	0.62	0.39	0.41	-1.2	0.00065	-1.9	1.7e-08
1169	PF00400:WD domain, G-beta repeat; PF00400:WD domain, G-beta repeat; PF00400:WD domain, G-beta repeat; PF00400:WD domain, G-beta repeat; PF00400:WD domain, G-beta repeat; PF00400:WD domain, G-beta repeat; PF00400:WD domain, G-beta repeat; PF00400:WD domain, G-beta repeat; PF00400:WD domain, G-beta repeat; PF00400:WD domain, G-beta repeat; PF00400:WD domain, G-beta repeat; PF00400:WD domain, G-beta…	-	-	-	-	-	-	-	-	-	-	-	-0.048	1	-0.2	0.27	0.17	0.61	-0.15	0.42	0.38	0.0088	0.74	1.5e-07
1170	PF07690:Major Facilitator Superfamily	-	-	-	-	-	2.A.1.14.4	-	-	-	-	-	0.0046	1	0.36	0.14	-0.024	0.98	0.35	0.14	1.1	9.5e-09	0.74	0.00022
1171	PF01822:WSC domain; PF01822:WSC domain	-	-	-	S	-	-	-	-	-	-	-	-0.085	1	-0.45	0.38	-0.31	0.77	-0.36	0.49	0.26	0.55	0.4	0.34
1172	-	-	-	-	-	-	-	-	-	-	-	-	-1.4	0.17	-1.3	0.021	-0.89	0.27	0.049	0.96	-2.4	1.8e-07	-2	1.9e-05
1173	PF01222:Ergosterol biosynthesis ERG4/ERG24 family	-	-	-	S	-	-	-	-	GO:0016020,membrane; GO:0004671,protein-S-isoprenylcysteine O-methyltransferase activity; GO:0006481,C-terminal protein amino acid methylation; GO:0016021,integral to membrane	-	-	-1.2	0.88	-1.5	0.14	-0.7	0.72	-0.25	0.85	1.4	0.088	2.1	0.008
1174	-	-	-	-	-	-	-	-	-	-	-	-	-0.78	0.98	-1.7	0.032	-0.41	0.84	-0.95	0.26	-3.5	8.3e-08	-2.2	0.0011
1175	-	-	-	-	S	-	-	-	-	-	-	-	-0.93	0.9	-1.8	0.018	-0.17	0.95	-0.92	0.27	-3.1	8.9e-07	-1.5	0.028
1176	PF00400:WD domain, G-beta repeat; PF00400:WD domain, G-beta repeat; PF00400:WD domain, G-beta repeat; PF00400:WD domain, G-beta repeat; PF00400:WD domain, G-beta repeat; PF00400:WD domain, G-beta repeat; PF00400:WD domain, G-beta repeat; PF00400:WD domain, G-beta repeat	-	-	-	-	-	-	-	-	-	-	-	0.082	1	-0.58	0.0038	0.63	0.0054	-0.66	0.00073	-0.31	0.083	0.91	8.9e-08
1177	PF00071:Ras family	-	-	-	S	-	-	-	-	GO:0005525,GTP binding; GO:0005622,intracellular; GO:0007264,small GTPase mediated signal transduction	-	-	-0.096	1	0.00011	1	0.25	0.63	0.096	0.79	-0.61	0.0072	-0.36	0.13
1178	-	-	-	-	-	-	-	-	-	-	-	-	-0.14	1	-0.46	0.39	-0.051	0.98	-0.32	0.57	-0.25	0.59	0.16	0.74
1179	PF01053:Cys/Met metabolism PLP-dependent enzyme	-	-	-	S	-	-	-	-	GO:0006520,amino acid metabolic process; GO:0030170,pyridoxal phosphate binding; GO:0016765,transferase activity, transferring alkyl or aryl (other than methyl) groups; GO:0003961,O-acetylhomoserine aminocarboxypropyltransferase activity	2.5.1.49	-	0.2	1	-2.8	0.0015	-0.47	0.84	-3	0.00056	-2.9	9.4e-05	-0.61	0.47
1180	PF06985:Heterokaryon incompatibility protein (HET)	-	-	-	-	-	-	-	-	-	-	-	0.058	1	-0.24	0.4	-0.28	0.55	-0.29	0.28	0.17	0.46	0.13	0.58
1181	PF00326:Prolyl oligopeptidase family	-	-	-	-	-	-	-	-	GO:0006508,proteolysis; GO:0008236,serine-type peptidase activity; GO:0004289,subtilase activity; GO:0008132,pancreatic elastase activity; GO:0008243,plasminogen activator activity; GO:0008991,serine-type signal peptidase activity; GO:0016808,proprotein convertase activity	3.4.21.-	-	0.44	0.083	-0.29	0.089	0.16	0.73	-0.72	1.7e-06	2.8	4.1e-76	3.3	3.2e-102
1182	PF07690:Major Facilitator Superfamily	-	-	-	-	-	2.A.1.14.4	-	-	-	-	-	0.25	1	-1.6	0.0085	-0.24	0.88	-1.8	0.0018	0.59	0.26	1.9	0.00012
1183	PF12171:Zinc-finger double-stranded RNA-binding	-	-	-	-	-	-	-	-	GO:0003676,nucleic acid binding; GO:0005622,intracellular; GO:0008270,zinc ion binding	-	-	-0.22	1	-0.076	0.91	0.13	0.93	0.14	0.82	-1.5	6.2e-05	-1.3	0.00069
1184	-	-	-	-	-	-	-	-	-	GO:0003676,nucleic acid binding; GO:0005622,intracellular; GO:0008270,zinc ion binding	-	-	-0.0091	1	0.27	0.39	0.12	0.88	0.27	0.37	-0.47	0.043	-0.62	0.0084
1185	-	-	-	-	-	-	-	-	-	GO:0003676,nucleic acid binding; GO:0005622,intracellular; GO:0008270,zinc ion binding	-	-	-0.34	1	-0.26	0.68	-0.035	0.98	0.082	0.91	-1.4	0.00083	-1.2	0.0057
1186	PF12874:Zinc-finger of C2H2 type; PF13912:C2H2-type zinc finger	-	-	-	-	-	-	-	-	GO:0003676,nucleic acid binding; GO:0005622,intracellular; GO:0008270,zinc ion binding	-	-	-0.21	1	-0.57	0.32	0.093	0.96	-0.36	0.56	-0.63	0.17	0.03	0.96
1187	PF00069:Protein kinase domain; PF00069:Protein kinase domain	-	-	-	S	Sphingoglycolipid metabolism; Benzoate degradation via CoA ligation; Starch and sucrose metabolism; Inositol phosphate metabolism; Nicotinate and nicotinamide metabolism	-	-	-	GO:0004672,protein kinase activity; GO:0005524,ATP binding; GO:0006468,protein amino acid phosphorylation; GO:0004674,protein serine/threonine kinase activity; GO:0008443,phosphofructokinase activity; GO:0008607,phosphorylase kinase regulator activity; GO:0008819,cobinamide kinase activity; GO:0016307,phosphatidylinositol phosphate kinase activity; GO:0016538,cyclin-dependent protein kinase regul…	2.7.1.-	-	-0.036	1	0.029	0.96	-0.3	0.71	0.065	0.91	-1.1	0.00099	-1.4	2e-05
1188	-	-	-	-	S	-	-	-	-	-	-	-	0	-	0	-	-0.11	-	0	1	0	1	-0.12	0.9
1189	-	-	-	-	S	-	-	-	-	GO:0004601,peroxidase activity; GO:0006118,electron transport; GO:0006979,response to oxidative stress; GO:0020037,heme binding	-	-	0.18	1	1.2	0.0077	-0.29	0.75	1	0.027	-0.075	0.85	-1.5	3.2e-05
1190	PF13360:PQQ-like domain; PF07774:ER membrane protein complex subunit 1, C-terminal; PF06087:Tyrosyl-DNA phosphodiesterase	-	-	-	S	-	-	-	-	GO:0005634,nucleus; GO:0006281,DNA repair; GO:0008081,phosphoric diester hydrolase activity	-	-	0.028	1	0.19	0.22	-0.049	0.91	0.17	0.3	1.3	3.7e-26	1	1.6e-17
1191	-	-	-	-	S	gamma-Hexachlorocyclohexane degradation; Riboflavin metabolism	-	-	-	GO:0003993,acid phosphatase activity	3.1.3.2	-	-0.28	1	-0.23	0.59	0.11	0.92	0.046	0.93	-1.2	9.2e-05	-0.82	0.007
1192	PF00773:RNB domain	-	-	-	-	-	-	-	-	GO:0003723,RNA binding; GO:0004540,ribonuclease activity	-	-	0.24	1	-0.039	0.93	0.18	0.87	-0.28	0.46	1.7	4.3e-08	1.9	6.4e-10
1193	-	-	-	-	-	-	-	-	-	-	-	-	0.26	-	0.5	0.59	0.008	-	0.24	0.79	-2.2	0.0006	-2.7	0.00052
1194	-	-	-	-	S	-	-	-	-	-	-	Fenton	0.11	1	0.58	0.48	0.15	0.96	0.46	0.59	0.75	0.25	0.32	0.66
1195	-	-	-	-	-	-	-	-	-	-	-	-	0.041	1	0.17	0.52	-0.081	0.91	0.13	0.64	0.62	0.0019	0.37	0.078
1196	PF00505:HMG (high mobility group) box; PF09011:HMG-box domain	TF	-	-	-	-	-	-	-	GO:0003677,DNA binding; GO:0006355,regulation of transcription, DNA-dependent	-	-	-0.04	1	0.66	0.02	-0.11	0.89	0.7	0.013	0.63	0.0078	-0.14	0.61
1197	-	-	-	-	-	-	-	-	-	GO:0004871,signal transducer activity	-	-	-0.21	0.81	-0.12	0.5	0.014	0.98	0.095	0.59	-0.56	5.5e-06	-0.43	0.00063
1198	PF03619:Organic solute transporter Ostalpha	-	-	-	S	-	-	-	-	-	-	-	0.32	0.83	0.31	0.21	0.29	0.49	-0.0078	0.99	1.4	2.5e-12	1.3	9.3e-12
1199	PF04614:Pex19 protein family	-	-	-	-	-	-	-	-	GO:0005777,peroxisome	-	-	0.079	1	0.41	0.0022	0.0059	0.99	0.33	0.016	1.3	2.3e-30	0.91	8e-15
1200	PF00153:Mitochondrial carrier protein; PF00153:Mitochondrial carrier protein; PF00153:Mitochondrial carrier protein	-	-	-	-	-	2.A.29.2.3	-	-	GO:0005488,binding; GO:0006810,transport; GO:0016020,membrane	-	-	0.37	1	-0.82	0.17	-0.3	0.83	-1.2	0.036	0.75	0.12	1.3	0.0078
1201	PF01876:RNase P subunit p30	-	-	-	-	-	-	-	-	GO:0004540,ribonuclease activity; GO:0008033,tRNA processing; GO:0003824,catalytic activity; GO:0004526,ribonuclease P activity	3.1.26.5	-	0.26	0.93	0.04	0.9	0.43	0.2	-0.22	0.39	0.47	0.016	0.86	1.3e-05
1202	-	-	-	-	S	-	-	-	-	-	-	-	1	0.032	1.1	0.0018	1.1	0.0026	0.046	0.93	-0.033	0.93	0.037	0.92
1203	PF04082:Fungal specific transcription factor domain; PF00172:Fungal Zn(2)-Cys(6) binuclear cluster domain	TF	-	-	-	-	-	-	-	GO:0003700,transcription factor activity; GO:0005634,nucleus; GO:0006355,regulation of transcription, DNA-dependent; GO:0008270,zinc ion binding; GO:0003677,DNA binding; GO:0006350,transcription	-	-	-0.46	0.81	-0.41	0.25	-0.13	0.89	0.058	0.9	-0.044	0.89	0.23	0.44
1204	PF00026:Eukaryotic aspartyl protease; PF00026:Eukaryotic aspartyl protease	-	-	-	S	-	-	MER204847	-	GO:0004194,pepsin A activity; GO:0006508,proteolysis; GO:0004190,aspartic-type endopeptidase activity; GO:0004193,cathepsin E activity	3.4.23.34	-	-0.13	1	-0.57	0.36	0.03	0.99	-0.44	0.5	-0.63	0.21	-0.026	0.97
1205	PF16209:Phospholipid-translocating ATPase N-terminal; PF16212:Phospholipid-translocating P-type ATPase C-terminal; PF00122:E1-E2 ATPase; PF13246:Cation transport ATPase (P-type)	-	-	-	-	-	3.A.3.8.4	-	-	GO:0005524,ATP binding; GO:0006810,transport; GO:0015662,ATPase activity, coupled to transmembrane movement of ions, phosphorylative mechanism; GO:0016020,membrane; GO:0003735,structural constituent of ribosome; GO:0005622,intracellular; GO:0005840,ribosome; GO:0006412,translation; GO:0003824,catalytic activity; GO:0008152,metabolic process; GO:0000287,magnesium ion binding; GO:0004012,phospholip…	3.6.3.1	-	0.26	0.71	-0.049	0.82	0.52	0.0051	-0.31	0.069	0.43	0.0024	0.99	4.2e-13
1206	PF08450:SMP-30/Gluconolactonase/LRE-like region	-	-	-	S	-	-	-	-	-	-	-	0.29	0.98	-0.76	0.017	-0.43	0.39	-1.1	0.00059	-0.69	0.011	-0.35	0.22
1207	PF12937:F-box-like	-	-	-	S	-	-	-	-	-	-	-	-0.28	0.93	-0.16	0.58	-0.54	0.061	0.12	0.69	-1.4	7.9e-13	-1.8	4.7e-20
1208	PF05706:Cyclin-dependent kinase inhibitor 3 (CDKN3)	-	-	-	-	-	-	-	-	GO:0016311,dephosphorylation; GO:0016791,phosphoric monoester hydrolase activity; GO:0004725,protein tyrosine phosphatase activity	-	-	-0.34	0.96	-0.26	0.5	-0.18	0.82	0.085	0.86	-1.2	1.8e-05	-1.1	6.9e-05
1209	-	-	-	-	-	-	-	-	-	-	-	-	-0.28	1	0.39	0.44	-0.4	0.52	0.67	0.16	-1.1	0.0011	-1.9	2.1e-07
1210	-	-	-	-	S	-	-	-	-	-	-	-	-1	0.62	-0.056	0.95	-0.14	0.95	0.97	0.13	-0.41	0.46	-0.49	0.38
1211	PF00069:Protein kinase domain	-	-	-	-	-	-	-	-	GO:0004672,protein kinase activity; GO:0005524,ATP binding; GO:0006468,protein amino acid phosphorylation; GO:0004713,protein-tyrosine kinase activity; GO:0004674,protein serine/threonine kinase activity; GO:0004682,protein kinase CK2 activity	2.7.11.1	-	-0.39	0.77	0.5	0.071	-0.09	0.91	0.89	0.00051	-0.027	0.92	-0.62	0.0069
1212	PF00656:Caspase domain	-	-	-	-	-	-	MER254907	-	GO:0000287,magnesium ion binding; GO:0004427,inorganic diphosphatase activity; GO:0005737,cytoplasm; GO:0006796,phosphate metabolic process; GO:0006508,proteolysis; GO:0030693,caspase activity	-	-	-1.6	0.51	-1.2	0.19	-0.41	0.86	0.36	0.75	0.68	0.38	1.5	0.048
1213	-	-	-	-	-	-	-	-	-	-	-	-	-0.13	1	0.43	0.17	0.34	0.5	0.56	0.066	-0.091	0.74	-0.18	0.54
1214	-	-	-	-	-	-	-	-	-	-	-	-	-0.16	1	0.14	0.59	0.33	0.33	0.3	0.2	0.25	0.2	0.44	0.024
1215	-	-	-	-	-	N-Glycan degradation; Sphingoglycolipid metabolism	-	-	-	GO:0015078,hydrogen ion transmembrane transporter activity; GO:0016469,proton-transporting two-sector ATPase complex; GO:0004308,exo-alpha-sialidase activity	3.2.1.18	-	0.2	1	1.5	0.00029	0.45	0.58	1.3	0.0021	2.5	2.2e-12	1.4	8.4e-05
1216	PF01161:Phosphatidylethanolamine-binding protein	-	-	-	-	-	-	MER319446	-	-	-	-	-0.65	1	-0.028	0.99	0.18	0.95	0.62	0.54	-4.4	3.9e-09	-4.1	3e-08
1217	-	-	-	-	-	-	-	-	-	-	-	-	-0.13	1	-0.28	0.37	-0.29	0.56	-0.15	0.68	-0.79	0.00064	-0.8	0.00057
1218	PF13393:Histidyl-tRNA synthetase; PF00069:Protein kinase domain; PF00069:Protein kinase domain; PF00069:Protein kinase domain; PF12745:Anticodon binding domain of tRNAs; PF05773:RWD domain	-	-	-	-	-	-	-	-	GO:0015078,hydrogen ion transmembrane transporter activity; GO:0016469,proton-transporting two-sector ATPase complex; GO:0004672,protein kinase activity; GO:0005524,ATP binding; GO:0006468,protein amino acid phosphorylation; GO:0004713,protein-tyrosine kinase activity; GO:0004674,protein serine/threonine kinase activity; GO:0004812,aminoacyl-tRNA ligase activity; GO:0006412,translation; GO:000551…	2.7.11.-	-	-0.045	1	-0.31	0.072	0.19	0.5	-0.27	0.12	-1	2e-14	-0.54	0.00012
1219	-	-	-	-	-	-	-	-	-	-	-	-	-0.74	0.21	0.72	0.044	-0.89	0.0071	1.5	4.4e-06	-2.5	1.1e-22	-4.1	1.2e-52
1220	PF10294:Lysine methyltransferase	-	-	-	-	-	-	-	-	-	-	-	-0.32	1	1.4	0.033	-0.22	0.91	1.8	0.0078	2.6	3.1e-06	0.91	0.12
1221	-	-	-	-	-	-	-	-	-	GO:0004402,histone acetyltransferase activity	2.3.1.48	-	-0.3	1	0.24	0.57	-0.24	0.75	0.53	0.14	-0.31	0.32	-0.78	0.0089
1222	PF01248:Ribosomal protein L7Ae/L30e/S12e/Gadd45 family	-	-	-	S	-	-	-	-	GO:0003735,structural constituent of ribosome; GO:0005622,intracellular; GO:0005840,ribosome; GO:0006412,translation; GO:0030529,ribonucleoprotein complex; GO:0042254,ribosome biogenesis and assembly	-	-	0.027	1	0.89	0.094	0.1	0.95	0.86	0.1	1.7	4.9e-05	0.93	0.033
1223	-	-	-	-	-	-	-	-	-	-	-	-	0.042	1	-0.5	0.017	0.14	0.76	-0.55	0.009	0.51	0.0039	1.2	1.6e-11
1224	PF13621:Cupin-like domain	-	-	-	-	-	-	-	-	-	-	-	-0.17	1	-0.06	0.84	-0.44	0.13	0.11	0.69	-0.082	0.7	-0.46	0.017
1225	PF03061:Thioesterase superfamily	-	-	-	S	-	-	-	-	-	-	-	-0.21	1	0.94	0.0048	0.046	0.97	1.2	0.00032	-0.016	0.96	-0.91	0.0013
1226	PF02732:ERCC4 domain	-	-	-	-	-	-	-	-	GO:0003677,DNA binding; GO:0004518,nuclease activity; GO:0005515,protein binding; GO:0005634,nucleus; GO:0006259,DNA metabolic process; GO:0042578,phosphoric ester hydrolase activity; GO:0043765,T/G mismatch-specific endonuclease activity	3.1.-.-	-	-0.0056	1	0.17	0.54	0.021	0.98	0.18	0.53	1.3	8.3e-10	1.1	7.8e-08
1227	-	-	-	-	-	-	-	-	-	-	-	-	-0.3	1	0.039	0.94	-0.0042	1	0.34	0.39	-1.6	7.7e-08	-1.6	3.6e-08
1228	PF00011:Hsp20/alpha crystallin family	-	-	-	-	-	-	-	-	-	-	-	0.69	1	3.1	0.0059	1.1	0.57	2.4	0.033	1.5	0.15	-0.52	0.62
1229	-	-	-	-	-	-	-	-	-	-	-	-	0.17	1	-0.3	0.69	-0.048	0.98	-0.47	0.51	-0.41	0.48	-0.15	0.81
1230	PF13632:Glycosyl transferase family group 2	-	-	-	S	-	-	-	-	-	-	-	-0.25	0.94	-0.28	0.27	0.53	0.057	-0.02	0.96	-0.78	4.1e-05	0.018	0.94
1231	PF00722:Glycosyl hydrolases family 16	-	-	GH16	-	-	-	-	-	GO:0004553,hydrolase activity, hydrolyzing O-glycosyl compounds; GO:0005975,carbohydrate metabolic process	-	-	-0.22	0.99	-0.26	0.36	0.16	0.78	-0.036	0.92	-0.38	0.085	0.04	0.88
1232	PF00067:Cytochrome P450	-	CYP53	-	S	Tryptophan metabolism; Fatty acid metabolism; gamma-Hexachlorocyclohexane degradation	-	-	-	GO:0004497,monooxygenase activity; GO:0005506,iron ion binding; GO:0006118,electron transport; GO:0020037,heme binding; GO:0050381,unspecific monooxygenase activity	1.14.14.1	-	0.19	0.98	0.73	0.00031	0.09	0.88	0.55	0.01	0.1	0.59	-0.54	0.0033
1233	-	-	-	-	-	-	-	-	-	-	-	-	0.08	1	0.27	0.6	-0.45	-	0.2	0.73	1.5	0.00026	0.81	0.054
1234	PF09334:tRNA synthetases class I (M)	-	-	-	-	Aminoacyl-tRNA biosynthesis; Methionine metabolism; Selenoamino acid metabolism	-	-	-	GO:0000166,nucleotide binding; GO:0004812,aminoacyl-tRNA ligase activity; GO:0005524,ATP binding; GO:0005737,cytoplasm; GO:0006412,translation; GO:0006418,tRNA aminoacylation for protein translation; GO:0004825,methionine-tRNA ligase activity; GO:0006431,methionyl-tRNA aminoacylation	6.1.1.10	-	-0.051	1	0.62	0.1	0.062	0.96	0.67	0.074	1.4	8e-06	0.83	0.01
1235	-	-	-	-	-	-	-	-	-	GO:0031072,heat shock protein binding; GO:0004682,protein kinase CK2 activity	2.7.11.1	-	0.019	1	0.021	0.92	0.014	0.98	0.0019	1	1.2	2.3e-17	1.1	3.7e-17
1236	-	-	-	-	-	-	-	-	-	-	-	-	-0.68	-	0.26	-	-0.24	-	0.94	0.4	-0.12	0.91	-0.61	0.52
1237	-	-	-	-	S	-	-	-	-	-	-	-	0.042	-	0.33	0.63	0.51	-	0.29	0.69	0.96	0.071	1.1	0.046
1238	-	-	-	-	-	-	-	-	-	-	-	-	0.043	1	-0.15	0.68	-0.18	0.79	-0.2	0.59	-1.7	3.1e-12	-1.7	2.1e-12
1239	PF00400:WD domain, G-beta repeat; PF00400:WD domain, G-beta repeat; PF00400:WD domain, G-beta repeat; PF00400:WD domain, G-beta repeat; PF00400:WD domain, G-beta repeat; PF00400:WD domain, G-beta repeat; PF04053:Coatomer WD associated region	-	-	-	-	-	-	-	-	GO:0005198,structural molecule activity; GO:0005515,protein binding; GO:0006461,protein complex assembly; GO:0006886,intracellular protein transport; GO:0008565,protein transporter activity; GO:0016192,vesicle-mediated transport; GO:0030117,membrane coat	-	-	0.044	1	0.026	0.91	0.15	0.66	-0.017	0.95	1.3	1.1e-21	1.5	1.3e-25
1240	PF08766:DEK C terminal domain; PF03142:Chitin synthase; PF00173:Cytochrome b5-like Heme/Steroid binding domain; PF00063:Myosin head (motor domain); PF00063:Myosin head (motor domain)	-	-	Myosin_motor; GT2	-	-	-	-	-	GO:0020037,heme binding; GO:0046914,transition metal ion binding; GO:0003774,motor activity; GO:0005524,ATP binding; GO:0016459,myosin complex; GO:0016758,transferase activity, transferring hexosyl groups	-	-	0.18	1	0.0054	0.99	0.21	0.64	-0.17	0.52	-0.25	0.23	-0.047	0.84
1241	-	-	-	-	S	-	-	-	-	-	-	-	0.044	1	-0.53	0.039	-0.51	0.12	-0.58	0.024	0.6	0.0051	0.63	0.0034
1242	PF00293:NUDIX domain	-	-	-	S	-	-	-	-	GO:0016787,hydrolase activity	-	-	-0.36	0.88	-0.19	0.56	0.083	0.93	0.17	0.62	0.14	0.61	0.41	0.097
1243	-	-	-	-	-	-	-	-	-	-	-	-	-0.49	0.98	-0.77	0.18	-0.28	0.83	-0.28	0.67	-1.7	0.00018	-1.2	0.0096
1244	-	-	-	-	-	-	-	-	-	-	-	-	0.54	0.91	0.29	0.61	0.58	-	-0.25	0.69	-0.37	0.35	-0.082	0.87
1245	PF00566:Rab-GTPase-TBC domain	-	-	-	-	-	-	-	-	GO:0005097,Rab GTPase activator activity; GO:0005622,intracellular; GO:0032313,regulation of Rab GTPase activity	-	-	-0.2	0.91	0.096	0.65	-0.22	0.46	0.3	0.098	-0.067	0.69	-0.38	0.012
1246	PF01602:Adaptin N terminal region	-	-	-	S	-	-	-	-	GO:0005515,protein binding; GO:0006461,protein complex assembly; GO:0006886,intracellular protein transport; GO:0016192,vesicle-mediated transport; GO:0030117,membrane coat; GO:0005488,binding	-	-	0.056	1	0.052	0.84	0.084	0.88	-0.0038	0.99	-0.097	0.59	-0.065	0.74
1247	PF03152:Ubiquitin fusion degradation protein UFD1	-	-	-	-	-	3.A.16.1.1	-	-	GO:0006511,ubiquitin-dependent protein catabolic process	-	-	-0.027	1	0.15	0.39	-0.16	0.57	0.17	0.3	0.67	1.8e-07	0.36	0.0063
1248	PF01233:Myristoyl-CoA:protein N-myristoyltransferase, N-terminal domain; PF02799:Myristoyl-CoA:protein N-myristoyltransferase, C-terminal domain	-	-	-	-	-	-	-	-	GO:0004379,glycylpeptide N-tetradecanoyltransferase activity; GO:0006499,N-terminal protein myristoylation	2.3.1.97	-	0.0097	1	-0.17	0.17	0.17	0.35	-0.18	0.14	-0.54	3.6e-08	-0.2	0.061
1249	PF07934:8-oxoguanine DNA glycosylase, N-terminal domain; PF00730:HhH-GPD superfamily base excision DNA repair protein	-	-	-	-	-	-	-	-	GO:0006284,base-excision repair; GO:0003824,catalytic activity; GO:0006281,DNA repair; GO:0003677,DNA binding; GO:0003684,damaged DNA binding; GO:0006289,nucleotide-excision repair; GO:0008534,oxidized purine base lesion DNA N-glycosylase activity	-	-	-0.22	0.94	-0.16	0.48	0.06	0.92	0.055	0.84	-0.66	7.5e-05	-0.44	0.011
1250	-	-	-	-	S	-	-	-	-	-	-	-	-0.41	1	-0.4	0.59	0.24	-	0.012	0.99	-2	2.3e-05	-1.4	0.0054
1251	PF00067:Cytochrome P450	-	CYP60	-	S	-	-	-	-	GO:0004497,monooxygenase activity; GO:0005506,iron ion binding; GO:0006118,electron transport; GO:0020037,heme binding	-	-	0.23	1	0.18	0.74	-0.26	0.8	-0.052	0.94	0.52	0.18	0.081	0.85
1252	PF00107:Zinc-binding dehydrogenase; PF08240:Alcohol dehydrogenase GroES-like domain	-	-	-	S	Bile acid biosynthesis; Tyrosine metabolism; Glycerolipid metabolism; Glycolysis / Gluconeogenesis; Fatty acid metabolism	-	-	-	GO:0003824,catalytic activity; GO:0005488,binding; GO:0008152,metabolic process; GO:0004022,alcohol dehydrogenase activity; GO:0004023,alcohol dehydrogenase activity, metal ion-independent; GO:0004024,alcohol dehydrogenase activity, zinc-dependent; GO:0004025,alcohol dehydrogenase activity, iron-dependent	1.1.1.1	-	-0.11	1	-0.15	0.53	0.017	0.98	-0.041	0.89	-0.26	0.16	-0.09	0.66
1253	-	-	-	-	-	-	-	-	-	-	-	-	0.065	1	0.59	0.069	0.11	0.93	0.52	0.11	1.5	2.4e-08	1	0.00024
1254	-	-	-	-	-	-	-	-	-	-	-	-	-0.42	0.98	-0.55	0.23	0.057	0.97	-0.13	0.82	-2.2	2e-10	-1.5	6e-06
1255	-	-	-	-	S	-	-	-	-	-	-	-	-0.086	1	-0.21	0.18	0.37	0.044	-0.12	0.46	0.23	0.077	0.8	8.2e-11
1256	-	-	-	-	-	-	-	-	-	GO:0003676,nucleic acid binding; GO:0005622,intracellular; GO:0008270,zinc ion binding	-	-	0.057	1	-0.036	0.86	0.11	0.76	-0.093	0.62	1.1	5e-16	1.2	2.2e-20
1257	PF08561:Mitochondrial ribosomal protein L37	-	-	-	-	-	-	-	-	-	-	-	-0.22	1	0.68	0.13	-0.066	0.96	0.9	0.043	0.23	0.56	-0.51	0.18
1258	PF00443:Ubiquitin carboxyl-terminal hydrolase	-	-	-	-	-	-	-	-	GO:0004221,ubiquitin thiolesterase activity; GO:0006511,ubiquitin-dependent protein catabolic process	3.1.2.15	-	-0.069	1	-0.025	0.91	0.47	0.012	0.044	0.85	-0.36	0.0094	0.13	0.39
1259	PF16192:C-terminal four TMM region of protein-O-mannosyltransferase; PF02815:MIR domain; PF02366:Dolichyl-phosphate-mannose-protein mannosyltransferase	-	-	GT39	-	-	-	-	-	GO:0000030,mannosyltransferase activity; GO:0006493,protein amino acid O-linked glycosylation; GO:0016020,membrane; GO:0004169,dolichyl-phosphate-mannose-protein mannosyltransferase activity	2.4.1.109	-	0.11	1	-0.054	0.82	-0.0058	0.99	-0.16	0.45	0.56	0.00031	0.61	8.9e-05
1260	PF01269:Fibrillarin	-	-	-	-	-	-	-	-	GO:0003723,RNA binding; GO:0005634,nucleus; GO:0006364,rRNA processing	-	-	0.012	1	0.83	0.031	-0.28	0.72	0.82	0.032	1.1	0.00032	0.02	0.96
1261	PF13012:Maintenance of mitochondrial structure and function; PF01398:JAB1/Mov34/MPN/PAD-1 ubiquitin protease	-	-	-	S	-	-	-	-	GO:0004298,threonine endopeptidase activity; GO:0004299,proteasome endopeptidase activity	3.4.25.1	-	-0.09	1	0.57	0.067	-0.078	0.94	0.66	0.031	0.76	0.0031	0.11	0.72
1262	PF02936:Cytochrome c oxidase subunit IV	-	-	-	S	Oxidative phosphorylation	3.D.4.8.1	-	-	GO:0004129,cytochrome-c oxidase activity; GO:0006118,electron transport; GO:0009481,aa3-type cytochrome c oxidase; GO:0009482,ba3-type cytochrome c oxidase; GO:0009483,caa3-type cytochrome c oxidase; GO:0009485,cbb3-type cytochrome c oxidase	1.9.3.1	-	0.15	1	0.37	0.25	-0.5	0.23	0.22	0.53	0.46	0.078	-0.42	0.11
1263	PF00098:Zinc knuckle; PF00098:Zinc knuckle; PF00098:Zinc knuckle; PF00098:Zinc knuckle; PF00098:Zinc knuckle; PF00098:Zinc knuckle; PF00098:Zinc knuckle	-	-	-	-	-	1.G.7.1.1	-	-	GO:0003676,nucleic acid binding; GO:0008270,zinc ion binding	-	-	-0.21	0.98	0.18	0.5	-0.64	0.015	0.39	0.098	0.98	2.8e-07	0.16	0.45
1264	PF00106:short chain dehydrogenase	-	-	-	S	-	-	-	-	GO:0008152,metabolic process; GO:0016491,oxidoreductase activity; GO:0003824,catalytic activity; GO:0005488,binding; GO:0043738,F420H2 dehydrogenase activity; GO:0043826,sulfur oxygenase reductase activity; GO:0043883,malolactic enzyme activity; GO:0051341,regulation of oxidoreductase activity	1.-.-.-	-	0.92	0.52	-0.53	0.32	-0.63	-	-1.5	0.0041	2.2	1.4e-05	2.1	4.3e-06
1265	PF00389:D-isomer specific 2-hydroxyacid dehydrogenase, catalytic domain; PF02826:D-isomer specific 2-hydroxyacid dehydrogenase, NAD binding domain	-	-	-	S	Glyoxylate and dicarboxylate metabolism; Methane metabolism	-	-	-	GO:0008152,metabolic process; GO:0016616,oxidoreductase activity, acting on the CH-OH group of donors, NAD or NADP as acceptor; GO:0051287,NAD binding; GO:0048037,cofactor binding; GO:0003824,catalytic activity; GO:0005488,binding; GO:0008863,formate dehydrogenase activity; GO:0009326,formate dehydrogenase complex	1.2.1.2	-	0.42	0.95	-0.49	0.24	-0.13	0.91	-0.91	0.022	0.22	0.54	0.58	0.089
1266	PF13410:Glutathione S-transferase, C-terminal domain; PF00749:tRNA synthetases class I (E and Q), catalytic domain; PF03950:tRNA synthetases class I (E and Q), anti-codon binding domain	-	-	-	S	Glutamate metabolism; Porphyrin and chlorophyll metabolism; Aminoacyl-tRNA biosynthesis	-	-	-	GO:0000166,nucleotide binding; GO:0004812,aminoacyl-tRNA ligase activity; GO:0005524,ATP binding; GO:0005737,cytoplasm; GO:0006412,translation; GO:0006424,glutamyl-tRNA aminoacylation; GO:0006418,tRNA aminoacylation for protein translation; GO:0004818,glutamate-tRNA ligase activity; GO:0009332,glutamate-tRNA ligase complex	6.1.1.17	-	-0.12	1	-0.012	0.98	0.24	0.67	0.11	0.76	2	7.8e-18	2.2	2.3e-22
1267	PF05971:RNA methyltransferase; PF05971:RNA methyltransferase	-	-	-	-	-	-	-	-	-	-	-	-0.16	1	-0.18	0.47	0.11	0.85	-0.014	0.97	-0.57	0.0015	-0.29	0.13
1268	PF00149:Calcineurin-like phosphoesterase	-	-	-	-	-	-	-	-	GO:0016787,hydrolase activity	-	-	-0.24	0.88	0.41	0.047	0.31	0.33	0.65	0.00075	0.22	0.22	0.11	0.57
1269	PF08502:LeuA allosteric (dimerisation) domain; PF08502:LeuA allosteric (dimerisation) domain; PF00682:HMGL-like	-	-	-	-	-	-	-	-	GO:0003824,catalytic activity; GO:0019752,carboxylic acid metabolic process; GO:0046912,transferase activity, transferring acyl groups, acyl groups converted into alkyl on transfer; GO:0003852,2-isopropylmalate synthase activity; GO:0009098,leucine biosynthetic process	2.3.3.13	-	-0.4	0.85	0.025	0.95	0.12	0.89	0.42	0.18	1.8	8.3e-14	1.9	3.5e-15
1270	PF04037:Domain of unknown function (DUF382); PF04046:PSP	-	-	-	-	-	-	-	-	GO:0005634,nucleus; GO:0006397,mRNA processing	-	-	0.013	1	0.14	0.23	0.27	0.054	0.13	0.28	0.28	0.0034	0.4	2.7e-05
1271	PF00271:Helicase conserved C-terminal domain; PF00270:DEAD/DEAH box helicase	-	-	-	-	Purine metabolism	3.A.18.1.1	-	-	GO:0003676,nucleic acid binding; GO:0004386,helicase activity; GO:0005524,ATP binding; GO:0008026,ATP-dependent helicase activity; GO:0004003,ATP-dependent DNA helicase activity; GO:0004004,ATP-dependent RNA helicase activity; GO:0008094,DNA-dependent ATPase activity; GO:0008186,RNA-dependent ATPase activity; GO:0015462,protein-transmembrane transporting ATPase activity; GO:0016887,ATPase activit…	3.6.1.3	-	-0.014	1	0.61	0.11	0.36	0.59	0.62	0.096	0.91	0.0029	0.66	0.035
1272	PF00782:Dual specificity phosphatase, catalytic domain	-	-	-	-	-	-	-	-	GO:0006470,protein amino acid dephosphorylation; GO:0008138,protein tyrosine/serine/threonine phosphatase activity; GO:0016311,dephosphorylation; GO:0016791,phosphoric monoester hydrolase activity; GO:0004725,protein tyrosine phosphatase activity	-	-	0.45	0.73	0.65	0.031	0.31	0.55	0.2	0.57	-2	4.8e-18	-2.4	1.7e-23
1273	PF00071:Ras family	-	-	-	S	-	9.A.50.1.1	-	-	GO:0005525,GTP binding; GO:0007264,small GTPase mediated signal transduction; GO:0003924,GTPase activity; GO:0005515,protein binding; GO:0006886,intracellular protein transport; GO:0006913,nucleocytoplasmic transport; GO:0007165,signal transduction; GO:0005622,intracellular; GO:0015031,protein transport; GO:0003925,small monomeric GTPase activity	3.6.5.2	-	-0.047	1	0.25	0.31	-0.087	0.88	0.3	0.22	-1.2	5.8e-11	-1.5	8.5e-17
1274	PF04627:Mitochondrial ATP synthase epsilon chain	-	-	-	-	-	-	-	-	GO:0005739,mitochondrion; GO:0015986,ATP synthesis coupled proton transport; GO:0016469,proton-transporting two-sector ATPase complex; GO:0046933,hydrogen ion transporting ATP synthase activity, rotational mechanism; GO:0046961,hydrogen ion transporting ATPase activity, rotational mechanism	-	-	-0.16	1	0.75	0.099	-0.4	0.63	0.91	0.041	-0.22	0.58	-1.4	0.00018
1275	-	-	-	-	-	-	-	-	-	-	-	-	0.24	1	-0.54	0.48	-0.019	0.99	-0.77	0.28	-0.9	0.12	-0.39	0.54
1276	-	-	-	-	S	-	-	-	-	-	-	-	-0.28	1	-0.54	0.51	0.088	0.97	-0.26	0.78	-0.26	0.7	0.37	0.59
1277	PF12770:CHAT domain	-	-	-	-	-	-	-	-	-	-	-	-0.2	1	-0.92	0.0028	-0.064	0.95	-0.71	0.023	0.12	0.69	0.97	0.0002
1278	PF00656:Caspase domain	-	-	-	-	-	-	-	-	GO:0006508,proteolysis; GO:0030693,caspase activity	-	-	0.12	1	-0.11	0.92	0.88	-	-0.23	0.84	-2.3	0.0006	-1.3	0.07
1279	PF00656:Caspase domain	-	-	-	S	-	-	-	-	GO:0006508,proteolysis; GO:0030693,caspase activity	-	-	-0.039	1	-0.81	0.16	0.15	0.93	-0.77	0.18	-5.5	4.9e-37	-4.5	8.1e-26
1280	-	-	-	-	-	-	-	-	-	-	-	-	0.55	0.32	0.2	0.5	-0.59	0.034	-0.34	0.24	-1.1	2.8e-08	-1.9	8.4e-21
1281	PF00656:Caspase domain	-	-	-	-	-	-	-	-	GO:0006508,proteolysis; GO:0030693,caspase activity	-	-	0.22	1	0.33	0.38	0.19	0.83	0.11	0.8	0.44	0.14	0.29	0.35
1282	PF00656:Caspase domain	-	-	-	S	-	-	-	-	GO:0006508,proteolysis; GO:0030693,caspase activity	-	-	0.13	1	-1.4	0.009	0.094	0.96	-1.5	0.004	0.53	0.27	2	5.8e-06
1283	PF07714:Protein tyrosine kinase	-	-	-	-	-	-	-	-	GO:0004672,protein kinase activity; GO:0005524,ATP binding; GO:0006468,protein amino acid phosphorylation; GO:0004713,protein-tyrosine kinase activity; GO:0004674,protein serine/threonine kinase activity; GO:0004675,transmembrane receptor protein serine/threonine kinase activity; GO:0004676,3-phosphoinositide-dependent protein kinase activity; GO:0004677,DNA-dependent protein kinase activity; GO:…	2.7.11.-	-	0.33	0.45	0.39	0.03	0.28	0.28	0.055	0.82	0.45	0.0024	0.34	0.027
1284	PF13193:AMP-binding enzyme C-terminal domain; PF00501:AMP-binding enzyme; PF00501:AMP-binding enzyme	-	-	-	-	Flavonoids, stilbene and lignin biosynthesis	-	-	-	GO:0003824,catalytic activity; GO:0008152,metabolic process; GO:0016207,4-coumarate-CoA ligase activity	6.2.1.12	-	0.46	1	-1	0.085	-0.068	0.97	-1.5	0.0098	0.54	0.3	1.5	0.0021
1285	PF11707:Ribosome 60S biogenesis N-terminal; PF16201:Nucleolar pre-ribosomal-associated protein 1	-	-	-	-	-	-	-	-	GO:0005198,structural molecule activity; GO:0007155,cell adhesion; GO:0015629,actin cytoskeleton; GO:0005488,binding	-	-	0.19	0.96	0.2	0.33	0.22	0.54	0.012	0.97	1.5	2.5e-20	1.5	2e-20
1286	PF14615:Ribosome-assembly protein 3	-	-	-	-	-	-	-	-	-	-	-	-0.37	0.94	0.19	0.65	-0.084	0.94	0.56	0.12	0.19	0.55	-0.081	0.82
1287	PF17769:Phosphoribosylaminoimidazole carboxylase C-terminal domain; PF02222:ATP-grasp domain; PF00731:AIR carboxylase	-	-	-	S	Purine metabolism	-	-	-	GO:0004638,phosphoribosylaminoimidazole carboxylase activity; GO:0006189,'de novo' IMP biosynthetic process; GO:0009320,phosphoribosylaminoimidazole carboxylase complex; GO:0003824,catalytic activity; GO:0005524,ATP binding	4.1.1.21	-	-0.11	1	-0.1	0.75	-0.29	0.57	0.004	1	1.8	2.6e-15	1.6	6e-13
1288	PF00646:F-box domain	-	-	-	-	-	-	-	-	-	-	-	-0.2	1	-0.57	0.046	0.042	0.96	-0.37	0.21	-0.47	0.05	0.14	0.59
1289	PF00155:Aminotransferase class I and II	-	-	-	S	Lysine biosynthesis; Caprolactam degradation; Aminophosphonate metabolism; Porphyrin and chlorophyll metabolism	-	-	-	GO:0009058,biosynthetic process; GO:0016769,transferase activity, transferring nitrogenous groups; GO:0030170,pyridoxal phosphate binding; GO:0018719,6-aminohexanoate transaminase activity; GO:0043746,N2-acetyl-L-lysine aminotransferase activity; GO:0043760,acetyldiaminopimelate aminotransferase activity; GO:0043840,branched-chain amino acid:2-keto-4-methylthiobutyrate aminotransferase activity; …	2.6.1.-	-	0.077	1	1.3	0.00098	0.9	0.059	1.2	0.0022	-1.5	3e-06	-1.9	6.7e-09
1290	-	-	-	-	S	-	-	-	-	-	-	-	0.15	1	-0.33	0.25	-0.16	0.78	-0.48	0.077	-1.6	1.9e-14	-1.4	9.2e-12
1291	-	-	-	-	S	-	-	-	-	-	-	-	-0.6	0.74	-0.74	0.068	0.045	0.97	-0.14	0.79	-1.2	0.00028	-0.41	0.25
1292	-	-	-	-	S	-	-	-	-	-	-	-	-0.18	1	0.065	0.91	-0.092	0.94	0.24	0.62	-1.4	8.3e-06	-1.6	1.3e-06
1293	-	-	-	-	S	-	-	-	-	-	-	-	-0.027	1	1	0.0057	-0.078	0.95	1.1	0.0043	1.1	0.00032	0.021	0.96
1294	PF16573:N-terminal beta-sandwich domain of polyadenylation factor; PF16575:mRNA cleavage and polyadenylation factor CLP1 P-loop; PF06807:Pre-mRNA cleavage complex II protein Clp1	-	-	-	-	-	-	-	-	-	-	-	-0.01	1	0.68	0.019	0.32	0.52	0.69	0.017	0.28	0.27	-0.077	0.79
1295	PF13499:EF-hand domain pair; PF07992:Pyridine nucleotide-disulphide oxidoreductase	-	-	-	S	-	-	-	-	GO:0016491,oxidoreductase activity; GO:0050660,FAD binding; GO:0005509,calcium ion binding; GO:0003954,NADH dehydrogenase activity	1.6.99.3	-	0.18	1	0.57	0.017	0.87	0.00043	0.39	0.11	-0.41	0.043	-0.12	0.61
1296	-	-	-	-	-	-	-	-	-	-	-	-	0.02	1	-0.86	0.046	-0.53	0.44	-0.88	0.04	-0.31	0.42	0.019	0.97
1297	PF00026:Eukaryotic aspartyl protease	-	-	-	S	-	8.A.32.1.1	MER155786	-	GO:0004194,pepsin A activity; GO:0006508,proteolysis; GO:0004190,aspartic-type endopeptidase activity	3.4.23.1	-	0.32	1	-0.2	0.92	-0.68	0.34	-0.52	0.68	-6.3	2.7e-25	-6.7	1.1e-24
1298	PF07714:Protein tyrosine kinase	-	-	-	-	-	1.A.26.1.1	-	-	GO:0004672,protein kinase activity; GO:0005524,ATP binding; GO:0006468,protein amino acid phosphorylation; GO:0004713,protein-tyrosine kinase activity; GO:0004674,protein serine/threonine kinase activity	-	-	0.35	0.98	-0.097	0.84	0.19	0.87	-0.45	0.26	3.4	4.7e-27	3.7	1.3e-31
1299	PF02772:S-adenosylmethionine synthetase, central domain; PF02773:S-adenosylmethionine synthetase, C-terminal domain; PF00438:S-adenosylmethionine synthetase, N-terminal domain	-	-	-	-	Selenoamino acid metabolism; Methionine metabolism	-	-	-	GO:0004478,methionine adenosyltransferase activity; GO:0005524,ATP binding; GO:0006730,one-carbon compound metabolic process; GO:0048269,methionine adenosyltransferase complex; GO:0048270,methionine adenosyltransferase regulator activity	2.5.1.6	-	0.026	1	1.1	0.0077	-0.33	0.71	1.1	0.0093	0.19	0.63	-1.3	0.00039
1300	PF06602:Myotubularin-like phosphatase domain	-	-	-	S	Vitamin B6 metabolism; Porphyrin and chlorophyll metabolism; Nicotinate and nicotinamide metabolism; Thiamine metabolism; Aminosugars metabolism; Riboflavin metabolism	-	-	-	GO:0004437,inositol or phosphatidylinositol phosphatase activity; GO:0046839,phospholipid dephosphorylation; GO:0004725,protein tyrosine phosphatase activity; GO:0016311,dephosphorylation; GO:0016791,phosphoric monoester hydrolase activity; GO:0001668,phosphatidylinositol-4,5-bisphosphate 5-phosphatase activity; GO:0008138,protein tyrosine/serine/threonine phosphatase activity; GO:0008330,protein…	3.1.3.-	-	-0.044	1	-0.075	0.85	0.36	0.47	-0.031	0.95	0.55	0.031	0.98	7.5e-05
1301	PF04616:Glycosyl hydrolases family 43	-	-	GH43	S	-	-	-	-	GO:0004553,hydrolase activity, hydrolyzing O-glycosyl compounds; GO:0005975,carbohydrate metabolic process	-	-	-0.92	0.67	-0.69	0.27	0.23	0.88	0.23	0.76	-0.42	0.43	0.51	0.33
1302	PF04616:Glycosyl hydrolases family 43	-	-	GH43	S	-	-	-	-	GO:0004553,hydrolase activity, hydrolyzing O-glycosyl compounds; GO:0005975,carbohydrate metabolic process	-	-	0.0024	1	-0.46	0.2	-0.67	0.12	-0.46	0.2	-1.5	3.2e-08	-1.7	2.4e-10
1303	PF10300:Protein of unknown function (DUF3808)	-	-	-	S	-	-	-	-	GO:0006508,proteolysis; GO:0008236,serine-type peptidase activity; GO:0016020,membrane	-	-	0.054	1	-0.066	0.61	-0.053	0.86	-0.12	0.32	0.48	2.2e-07	0.49	1.1e-07
1304	PF07748:Glycosyl hydrolases family 38 C-terminal domain; PF01074:Glycosyl hydrolases family 38 N-terminal domain; PF09261:Alpha mannosidase middle domain; PF17677:Glycosyl hydrolases family 38 C-terminal beta sandwich domain	-	-	GH38	-	N-Glycan degradation	-	-	-	GO:0004559,alpha-mannosidase activity; GO:0005975,carbohydrate metabolic process; GO:0003824,catalytic activity; GO:0006013,mannose metabolic process; GO:0015923,mannosidase activity	3.2.1.24	-	0.31	0.88	-0.33	0.2	0.26	0.54	-0.64	0.0084	0.7	0.00061	1.3	1.1e-10
1305	PF01408:Oxidoreductase family, NAD-binding Rossmann fold	-	-	-	S	-	-	-	-	GO:0016491,oxidoreductase activity; GO:0003824,catalytic activity; GO:0005488,binding; GO:0008152,metabolic process; GO:0047115,trans-1,2-dihydrobenzene-1,2-diol dehydrogenase activity	1.3.1.20	-	0.74	0.72	-1	0.032	-0.94	0.12	-1.8	7e-05	-1.2	0.0025	-1.1	0.006
1306	-	-	-	-	-	-	1.C.4.5.1	-	-	-	-	-	-0.33	1	0.26	0.67	-0.048	0.98	0.59	0.28	-0.22	0.64	-0.53	0.25
1307	PF13621:Cupin-like domain	-	-	-	-	-	-	-	-	-	-	-	-0.057	1	0.36	0.35	0.23	0.78	0.42	0.27	1.5	4.5e-07	1.4	5.6e-06
1308	-	-	-	-	-	-	-	-	-	GO:0004527,exonuclease activity; GO:0005622,intracellular; GO:0003676,nucleic acid binding	-	-	-0.15	1	0.19	0.34	0.22	0.48	0.34	0.063	1.1	8.7e-14	1.1	2.2e-14
1309	PF01485:IBR domain, a half RING-finger domain	-	-	-	-	-	-	-	-	GO:0008270,zinc ion binding	-	-	0.1	1	0.031	0.86	0.32	0.095	-0.068	0.67	0.99	2.2e-18	1.3	2.3e-28
1310	PF00106:short chain dehydrogenase	-	-	-	-	-	-	-	-	GO:0008152,metabolic process; GO:0016491,oxidoreductase activity; GO:0003824,catalytic activity; GO:0005488,binding	-	-	-0.55	0.9	1.1	0.029	-1	0.073	1.6	0.0004	0.33	0.43	-1.8	8.6e-06
1311	PF09260:Domain of unknown function (DUF1966); PF00128:Alpha amylase, catalytic domain	-	-	GH13_1	S	Starch and sucrose metabolism	3.A.1.1.6	-	-	GO:0003824,catalytic activity; GO:0005975,carbohydrate metabolic process; GO:0043169,cation binding; GO:0004556,alpha-amylase activity; GO:0005509,calcium ion binding	3.2.1.1	-	-1.1	-	0.77	-	0.16	-	1.9	0.034	2	0.025	1.4	0.12
1312	PF09260:Domain of unknown function (DUF1966); PF00128:Alpha amylase, catalytic domain	-	-	GH13_1	-	Starch and sucrose metabolism	3.A.1.1.6	-	-	GO:0003824,catalytic activity; GO:0005975,carbohydrate metabolic process; GO:0043169,cation binding; GO:0004556,alpha-amylase activity; GO:0005509,calcium ion binding	3.2.1.1	-	-0.23	1	-1.1	0.24	-0.22	0.93	-0.83	0.38	2.2	0.0019	3	1.5e-05
1313	PF00144:Beta-lactamase	-	-	-	-	-	-	MER254729	-	GO:0008800,beta-lactamase activity; GO:0030655,beta-lactam antibiotic catabolic process; GO:0046677,response to antibiotic	-	-	0.017	1	-0.082	0.85	-0.15	0.87	-0.1	0.83	0.66	0.022	0.6	0.041
1314	PF00106:short chain dehydrogenase	-	-	-	-	Pentose and glucuronate interconversions	-	-	-	GO:0008152,metabolic process; GO:0016491,oxidoreductase activity; GO:0003824,catalytic activity; GO:0005488,binding; GO:0050255,ribitol 2-dehydrogenase activity	1.1.1.56	-	-0.057	1	-0.46	0.48	-0.68	0.51	-0.4	0.54	10	4e-98	10	2.8e-101
1315	-	-	-	-	-	-	-	-	-	-	-	-	-0.31	1	-0.53	0.2	0.26	0.77	-0.21	0.65	0.38	0.27	1.2	0.00037
1316	PF01467:Cytidylyltransferase-like	-	-	-	-	-	-	-	-	GO:0009058,biosynthetic process; GO:0016779,nucleotidyltransferase activity; GO:0003824,catalytic activity	-	-	-0.19	1	-0.27	0.27	0.052	0.95	-0.083	0.78	0.89	5.4e-06	1.2	3.3e-10
1317	-	-	-	-	-	-	-	-	-	-	-	-	-	-	-	-	-	-	-	-	-	-	-	-
1318	PF01553:Acyltransferase	-	-	-	-	-	-	-	-	GO:0008152,metabolic process; GO:0008415,acyltransferase activity	-	-	0.23	1	0.49	0.21	-0.27	0.75	0.27	0.54	0.55	0.091	-0.21	0.56
1319	-	-	-	-	-	-	-	-	-	-	-	-	-0.74	0.88	-0.22	0.77	0.038	0.98	0.52	0.42	-1.8	0.00026	-1.5	0.0023
1320	PF06985:Heterokaryon incompatibility protein (HET)	-	-	-	-	-	-	-	-	-	-	-	-0.017	1	0.11	0.75	-0.15	0.85	0.13	0.72	0.21	0.43	-0.05	0.87
1321	-	-	-	-	-	-	-	-	-	-	-	-	0.062	1	0.32	0.32	-0.14	0.86	0.25	0.44	0.13	0.63	-0.32	0.22
1322	-	-	-	-	-	-	-	-	-	-	-	-	-0.68	0.34	0.32	0.45	-0.19	0.85	1	0.005	0.28	0.41	-0.22	0.54
1323	-	-	-	-	-	-	-	-	-	-	-	-	0.36	0.98	0.18	0.69	0.57	0.12	-0.18	0.74	-1.7	2.2e-11	-1.3	8.2e-06
1324	-	-	-	-	S	-	-	-	-	-	-	-	-0.071	1	-0.2	0.66	-0.079	0.95	-0.13	0.79	-0.9	0.0028	-0.78	0.012
1325	PF08320:PIG-X / PBN1	-	-	-	S	-	-	-	-	-	-	-	-0.059	1	-0.19	0.45	-0.47	0.069	-0.13	0.63	-0.46	0.013	-0.74	3.1e-05
1326	PF01591:6-phosphofructo-2-kinase; PF00300:Histidine phosphatase superfamily (branch 1)	-	-	-	-	Fructose and mannose metabolism	-	-	-	GO:0003824,catalytic activity; GO:0008152,metabolic process; GO:0005524,ATP binding; GO:0006003,fructose 2,6-bisphosphate metabolic process; GO:0004331,fructose-2,6-bisphosphate 2-phosphatase activity	3.1.3.46	-	0.15	1	-0.021	0.94	-0.53	0.019	-0.17	0.45	0.34	0.047	-0.17	0.34
1327	-	-	-	GT8	S	-	-	-	-	-	-	-	-0.17	1	-0.16	0.65	0.0046	0.99	0.016	0.97	-1.1	3e-07	-0.97	2e-05
1328	PF11838:ERAP1-like C-terminal domain; PF17900:Peptidase M1 N-terminal domain; PF01433:Peptidase family M1 domain	-	-	-	-	-	-	-	-	GO:0008237,metallopeptidase activity; GO:0008270,zinc ion binding; GO:0016284,alanine aminopeptidase activity	3.4.11.-	-	0.28	1	0.41	0.27	0.38	0.51	0.13	0.78	-1.2	3e-05	-1.2	2.8e-05
1329	PF00248:Aldo/keto reductase family	-	-	-	-	-	8.A.5.1.1	-	-	GO:0016491,oxidoreductase activity; GO:0047681,aryl-alcohol dehydrogenase (NADP+) activity	1.1.1.91	-	0.31	1	-0.79	0.071	-0.27	0.78	-1.1	0.0092	-1.6	7.8e-06	-1	0.0036
1330	-	-	-	-	S	-	-	-	-	-	-	-	0.8	0.94	1.4	0.075	-0.6	0.69	0.56	0.51	1.6	0.013	-0.4	0.57
1331	PF00067:Cytochrome P450	-	CYP62	-	S	gamma-Hexachlorocyclohexane degradation; Ascorbate and aldarate metabolism; Flavonoids, stilbene and lignin biosynthesis; Fluorene degradation	-	-	-	GO:0004497,monooxygenase activity; GO:0005506,iron ion binding; GO:0006118,electron transport; GO:0020037,heme binding; GO:0018585,fluorene oxygenase activity; GO:0018586,mono-butyltin dioxygenase activity; GO:0018587,limonene 8-monooxygenase activity; GO:0018588,tri-n-butyltin dioxygenase activity; GO:0018589,di-n-butyltin dioxygenase activity; GO:0018590,methylsilanetriol hydroxylase activity; …	1.14.-.-	-	-1.6	0.56	-1	0.3	0.067	0.98	0.57	0.61	0.12	0.9	1.2	0.13
1332	PF17667:Fungal protein kinase	-	-	-	-	-	-	-	-	GO:0004713,protein-tyrosine kinase activity; GO:0005524,ATP binding; GO:0006468,protein amino acid phosphorylation	-	-	-0.45	0.92	-0.5	0.22	0.36	0.62	-0.058	0.92	-0.52	0.12	0.35	0.32
1333	PF00067:Cytochrome P450	-	CYP50	-	-	-	-	-	-	GO:0004497,monooxygenase activity; GO:0005506,iron ion binding; GO:0006118,electron transport; GO:0020037,heme binding	-	-	0.072	1	0.25	0.67	0.38	0.73	0.17	0.78	1.7	3.2e-05	1.8	9.7e-06
1334	PF12998:Inhibitor of growth proteins N-terminal histone-binding	-	-	-	-	-	-	-	-	GO:0001584,rhodopsin-like receptor activity; GO:0007186,G-protein coupled receptor protein signaling pathway; GO:0016021,integral to membrane	-	-	-0.3	0.91	0.022	0.95	0.47	0.2	0.32	0.25	0.12	0.63	0.57	0.012
1335	PF18595:Designed helical repeat protein 10 domain; PF03800:Nuf2 family	-	-	-	S	-	-	-	-	GO:0000775,chromosome, pericentric region; GO:0007067,mitosis	-	-	-0.25	0.74	0.16	0.41	0.18	0.55	0.41	0.017	-0.076	0.63	-0.051	0.77
1336	PF09382:RQC domain; PF00270:DEAD/DEAH box helicase; PF00271:Helicase conserved C-terminal domain; PF16124:RecQ zinc-binding	-	-	-	S	Starch and sucrose metabolism; Folate biosynthesis	-	-	-	GO:0003676,nucleic acid binding; GO:0004386,helicase activity; GO:0005524,ATP binding; GO:0006310,DNA recombination; GO:0008026,ATP-dependent helicase activity; GO:0000810,diacylglycerol pyrophosphate phosphatase activity; GO:0004787,thiamin-pyrophosphatase activity; GO:0008413,8-oxo-7,8-dihydroguanine triphosphatase activity; GO:0008758,UDP-2,3-diacylglucosamine hydrolase activity; GO:0008796,bi…	3.6.1.-	-	0.26	0.94	0.69	0.0051	0.36	0.35	0.42	0.097	0.41	0.054	0.077	0.76
1337	PF04632:Fusaric acid resistance protein family	-	-	-	S	-	-	-	-	-	-	-	0.077	1	0.33	0.21	0.62	0.035	0.25	0.36	-0.035	0.89	0.25	0.26
1338	PF00271:Helicase conserved C-terminal domain; PF00270:DEAD/DEAH box helicase	-	-	-	-	Starch and sucrose metabolism; Folate biosynthesis	3.A.18.1.1	-	-	GO:0003676,nucleic acid binding; GO:0004386,helicase activity; GO:0005524,ATP binding; GO:0008026,ATP-dependent helicase activity; GO:0000810,diacylglycerol pyrophosphate phosphatase activity; GO:0004787,thiamin-pyrophosphatase activity; GO:0008413,8-oxo-7,8-dihydroguanine triphosphatase activity; GO:0008758,UDP-2,3-diacylglucosamine hydrolase activity; GO:0008796,bis(5'-nucleosyl)-tetraphosphata…	3.6.1.-	-	0.024	1	0.26	0.17	0.13	0.74	0.23	0.22	0.25	0.1	0.12	0.46
1339	PF01087:Galactose-1-phosphate uridyl transferase, N-terminal domain; PF02744:Galactose-1-phosphate uridyl transferase, C-terminal domain	-	-	-	-	DNA polymerase; Ubiquinone biosynthesis	-	-	-	GO:0006012,galactose metabolic process; GO:0008108,UDP-glucose:hexose-1-phosphate uridylyltransferase activity; GO:0003824,catalytic activity; GO:0003720,telomerase activity; GO:0003724,RNA helicase activity; GO:0003887,DNA-directed DNA polymerase activity; GO:0003896,DNA primase activity; GO:0004779,sulfate adenylyltransferase activity; GO:0008192,RNA guanylyltransferase activity; GO:0008193,tRN…	2.7.7.-	-	0.21	1	0.18	0.61	-0.46	0.27	-0.029	0.95	-0.92	0.00017	-1.6	1.4e-10
1340	PF00106:short chain dehydrogenase	-	-	-	S	-	-	-	-	GO:0008152,metabolic process; GO:0016491,oxidoreductase activity; GO:0003824,catalytic activity; GO:0005488,binding; GO:0043738,F420H2 dehydrogenase activity; GO:0043826,sulfur oxygenase reductase activity; GO:0043883,malolactic enzyme activity; GO:0051341,regulation of oxidoreductase activity	1.-.-.-	-	0.0072	1	0.42	0.31	-0.00069	1	0.41	0.31	-0.2	0.56	-0.62	0.057
1341	PF01504:Phosphatidylinositol-4-phosphate 5-Kinase	-	-	-	-	-	-	-	-	GO:0016307,phosphatidylinositol phosphate kinase activity; GO:0046488,phosphatidylinositol metabolic process; GO:0000285,1-phosphatidylinositol-3-phosphate 5-kinase activity	2.7.1.150	-	-0.058	1	-0.24	0.46	0.31	0.53	-0.18	0.6	-1	1.7e-05	-0.46	0.064
1342	PF00160:Cyclophilin type peptidyl-prolyl cis-trans isomerase/CLD	-	-	-	-	-	-	-	-	GO:0003755,peptidyl-prolyl cis-trans isomerase activity; GO:0006457,protein folding; GO:0004600,cyclophilin; GO:0030051,FK506-sensitive peptidyl-prolyl cis-trans isomerase; GO:0042027,cyclophilin-type peptidyl-prolyl cis-trans isomerase activity	5.2.1.8	-	-0.2	1	0.5	0.072	-0.028	0.98	0.7	0.0094	-0.047	0.86	-0.57	0.013
1343	PF14934:Domain of unknown function (DUF4499); PF10615:Protein of unknown function (DUF2470)	-	-	-	-	-	-	-	-	-	-	-	-0.065	1	-0.071	0.81	-0.36	0.27	-0.0069	0.99	-0.65	0.00069	-0.94	7.3e-07
1344	PF02966:Mitosis protein DIM1	-	-	-	-	-	-	-	-	GO:0005681,spliceosome; GO:0007067,mitosis	-	-	-0.22	0.96	0.18	0.46	0.025	0.97	0.4	0.069	-0.89	3e-07	-1	2.1e-09
1345	PF01134:Glucose inhibited division protein A; PF13932:GidA associated domain	-	-	-	S	-	-	-	-	GO:0008033,tRNA processing; GO:0050660,FAD binding	-	-	-0.16	1	0.22	0.27	0.11	0.8	0.37	0.044	0.12	0.47	0.011	0.96
1346	PF05207:CSL zinc finger	-	-	-	-	-	-	-	-	-	-	-	-0.38	0.68	-0.18	0.53	-0.31	0.45	0.21	0.45	-0.081	0.73	-0.21	0.35
1347	PF00432:Prenyltransferase and squalene oxidase repeat; PF00432:Prenyltransferase and squalene oxidase repeat; PF00432:Prenyltransferase and squalene oxidase repeat; PF00432:Prenyltransferase and squalene oxidase repeat; PF00432:Prenyltransferase and squalene oxidase repeat	-	-	-	-	-	-	-	-	GO:0003824,catalytic activity; GO:0004663,Rab-protein geranylgeranyltransferase activity	2.5.1.60	-	-0.22	0.88	-0.22	0.24	-0.19	0.59	-0.00052	1	0.95	5e-10	0.98	6.5e-11
1348	PF11976:Ubiquitin-2 like Rad60 SUMO-like	-	-	-	-	-	-	-	-	GO:0006464,protein modification process	-	-	-0.27	0.85	-0.15	0.5	-0.3	0.3	0.11	0.64	-0.19	0.29	-0.34	0.052
1349	-	-	-	-	S	-	-	-	-	-	-	-	-0.96	0.26	-0.35	0.47	-0.14	0.91	0.61	0.18	-0.75	0.045	-0.53	0.17
1350	-	-	-	-	S	-	-	-	-	-	-	-	-1.5	0.23	0.084	0.92	-0.15	0.95	1.6	0.018	-3.9	2.5e-12	-4.1	1.6e-13
1351	PF07690:Major Facilitator Superfamily	-	-	-	S	-	2.A.1.13.4	-	-	GO:0005215,transporter activity; GO:0006810,transport; GO:0016021,integral to membrane	-	-	-0.2	1	-0.33	0.24	-0.083	0.9	-0.13	0.7	-3.9	6.3e-88	-3.6	5.9e-76
1352	PF16113:Enoyl-CoA hydratase/isomerase	-	-	-	-	Fatty acid metabolism; beta-Alanine metabolism; Tryptophan metabolism; Lysine degradation; Fatty acid biosynthesis (path 2); Benzoate degradation via CoA ligation; Butanoate metabolism; Valine, leucine and isoleucine degradation; Propanoate metabolism	-	-	-	GO:0003824,catalytic activity; GO:0008152,metabolic process; GO:0004300,enoyl-CoA hydratase activity	4.2.1.17	-	0.27	0.99	-0.34	0.31	0.16	0.83	-0.61	0.05	-2.2	8.7e-21	-1.8	5.2e-13
1353	-	-	-	-	-	-	-	-	-	-	-	-	-	-	-	-	-	-	-	-	-	-	-	-
1354	-	-	-	-	-	-	-	-	-	-	-	-	-	-	-	-	-	-	-	-	-	-	-	-
1355	-	-	-	-	S	-	-	-	-	-	-	-	-	-	-	-	-	-	-	-	-	-	-	-
1356	-	-	-	-	S	-	-	-	-	-	-	-	1.4	-	4.6	1.1e-05	-0.12	-	3.2	0.0033	4.2	2.2e-06	-0.57	0.55
1357	-	-	-	-	-	-	-	-	-	-	-	-	-0.004	1	0.089	0.9	0.41	0.7	0.093	0.9	-0.23	0.63	0.088	0.87
1358	-	-	-	-	S	-	-	-	-	-	-	-	-0.26	1	-0.28	0.61	-0.011	0.99	-0.014	0.99	-4.4	2.3e-34	-4.1	3.3e-30
1359	PF00732:GMC oxidoreductase; PF05199:GMC oxidoreductase; PF05199:GMC oxidoreductase	-	-	AA3_2	-	Glycine, serine and threonine metabolism	-	-	-	GO:0016614,oxidoreductase activity, acting on CH-OH group of donors; GO:0050660,FAD binding; GO:0006066,alcohol metabolic process; GO:0008812,choline dehydrogenase activity	1.1.99.1	Fenton	-0.3	1	-0.68	0.25	0.25	0.87	-0.38	0.55	0.22	0.69	1.1	0.017
1360	PF01055:Glycosyl hydrolases family 31	-	-	GH31	S	Galactose metabolism; Starch and sucrose metabolism	-	-	-	GO:0004553,hydrolase activity, hydrolyzing O-glycosyl compounds; GO:0005975,carbohydrate metabolic process; GO:0004558,alpha-glucosidase activity	3.2.1.20	-	-0.26	1	-0.12	0.85	-0.065	0.96	0.14	0.8	-4.7	1.8e-44	-4.6	2.2e-41
1361	PF16863:N-terminal barrel of NtMGAM and CtMGAM, maltase-glucoamylase; PF01055:Glycosyl hydrolases family 31; PF13802:Galactose mutarotase-like	-	-	GH31	S	N-Glycans biosynthesis; Nucleotide sugars metabolism; Aminosugars metabolism; Glycosaminoglycan degradation	-	-	-	GO:0004553,hydrolase activity, hydrolyzing O-glycosyl compounds; GO:0005975,carbohydrate metabolic process; GO:0005509,calcium ion binding; GO:0008933,lytic transglycosylase activity; GO:0015923,mannosidase activity; GO:0015924,mannosyl-oligosaccharide mannosidase activity; GO:0015925,galactosidase activity; GO:0015926,glucosidase activity; GO:0015927,trehalase activity; GO:0015928,fucosidase act…	3.2.1.-	-	-0.91	0.62	-0.095	0.93	0.73	0.22	0.81	0.17	-3.6	2.1e-17	-2.7	1.7e-09
1362	-	-	-	-	S	-	-	-	-	-	-	-	0.059	1	0.95	0.23	-0.56	0.72	0.89	0.26	-6.6	2.6e-27	-8.1	1.2e-37
1363	PF13420:Acetyltransferase (GNAT) domain	-	-	-	-	Benzoate degradation via CoA ligation; Tyrosine metabolism; Aminosugars metabolism; Glycerolipid metabolism; Valine, leucine and isoleucine degradation; Ethylbenzene degradation; Phenylalanine metabolism; Lipopolysaccharide biosynthesis; Lysine biosynthesis; Butanoate metabolism; D-Arginine and D-ornithine metabolism; Histidine metabolism; Lysine degradation	-	-	-	GO:0008080,N-acetyltransferase activity; GO:0008152,metabolic process; GO:0004147,dihydrolipoamide branched chain acyltransferase activity; GO:0004405,H2A/H2B histone acetyltransferase activity; GO:0004406,H3/H4 histone acetyltransferase activity; GO:0008374,O-acyltransferase activity; GO:0008415,acyltransferase activity; GO:0008951,palmitoleoyl [acyl-carrier-protein]-dependent acyltransferase ac…	2.3.1.-	-	-0.27	0.95	-0.026	0.94	-0.038	0.96	0.24	0.41	-0.53	0.015	-0.54	0.015
1364	-	-	-	-	S	-	-	-	-	-	-	-	0.34	-	1.8	-	-1.3	-	1.4	0.18	0.94	0.26	-2.2	0.016
1365	-	-	-	-	-	-	-	-	-	-	-	-	-0.19	-	0.67	-	0.61	-	0.87	0.27	-0.12	0.85	-0.19	0.8
1366	-	-	-	-	-	-	-	-	-	-	-	-	-0.22	1	0.79	0.079	-0.014	0.99	1	0.02	-0.17	0.66	-0.97	0.01
1367	-	-	-	-	-	-	-	-	-	-	-	-	0.29	1	-1.4	0.00014	-0.44	0.45	-1.7	2.4e-06	-3.7	6.4e-35	-2.7	6.7e-21
1368	-	-	-	-	-	-	-	-	-	-	-	-	-0.069	1	-0.42	0.052	0.095	0.88	-0.35	0.1	0.047	0.83	0.56	0.002
1369	PF00613:Phosphoinositide 3-kinase family, accessory domain (PIK domain); PF00454:Phosphatidylinositol 3- and 4-kinase; PF00454:Phosphatidylinositol 3- and 4-kinase; PF00792:Phosphoinositide 3-kinase C2	-	-	-	S	Inositol phosphate metabolism	-	-	-	GO:0016773,phosphotransferase activity, alcohol group as acceptor; GO:0004428,inositol or phosphatidylinositol kinase activity; GO:0005942,phosphoinositide 3-kinase complex; GO:0016303,1-phosphatidylinositol-3-kinase activity; GO:0046854,phosphoinositide phosphorylation; GO:0048015,phosphoinositide-mediated signaling; GO:0005488,binding; GO:0015072,phosphatidylinositol 3-kinase, class I, catalyst…	2.7.1.137	-	0.12	1	-1.5	0.029	-0.18	0.93	-1.6	0.016	3.5	5.1e-11	4.8	1.5e-19
1370	PF00067:Cytochrome P450	-	CYP51	-	S	Prostaglandin and leukotriene metabolism	-	-	-	GO:0004497,monooxygenase activity; GO:0005506,iron ion binding; GO:0006118,electron transport; GO:0020037,heme binding; GO:0050051,leukotriene-B4 20-monooxygenase activity	1.14.13.30	-	0.13	1	-0.37	0.36	-0.036	0.98	-0.5	0.2	-1.1	0.00024	-0.77	0.013
1371	PF06966:Protein of unknown function (DUF1295)	-	-	-	S	-	-	-	-	-	-	-	-0.12	1	-0.31	0.16	0.19	0.62	-0.19	0.42	-0.8	2.4e-06	-0.3	0.094
1372	PF13019:Silencing defective 2 N-terminal ubiquitin domain	-	-	-	S	-	-	-	-	-	-	-	-0.014	1	-0.19	0.28	-0.12	0.73	-0.18	0.32	0.089	0.57	0.16	0.28
1373	-	-	-	-	-	-	-	-	-	GO:0018820,cyanamide hydratase activity	4.2.1.69	-	1.4	0.015	-0.83	0.061	-0.46	0.56	-2.2	2e-08	1.9	1.6e-07	2.3	2.2e-10
1374	-	-	-	-	S	-	-	-	-	-	-	-	-0.76	-	0.96	-	-1.4	-	1.7	0.097	1.6	0.077	-0.78	0.41
1375	PF12937:F-box-like	-	-	-	S	-	-	-	-	-	-	-	-0.19	1	-0.52	0.3	0.49	0.56	-0.34	0.53	-0.55	0.18	0.46	0.28
1376	-	-	-	-	-	-	-	-	-	-	-	-	0.037	1	-0.29	0.18	0.53	0.014	-0.33	0.12	-1.5	1.3e-21	-0.69	3.3e-05
1377	-	-	-	-	S	-	-	-	-	-	-	-	-0.4	1	-0.073	0.93	-0.07	-	0.33	0.59	-1.7	2.3e-05	-1.7	6.2e-05
1378	-	-	-	-	-	-	-	-	-	-	-	-	0.19	-	-0.057	0.98	0.16	-	-0.24	0.9	-3.5	9.6e-08	-3.3	1.1e-05
1379	PF00293:NUDIX domain	-	-	-	-	-	-	-	-	GO:0016787,hydrolase activity	-	-	-0.3	0.98	0.63	0.06	-0.31	0.61	0.93	0.0036	1	0.0002	0.071	0.83
1380	PF13500:AAA domain; PF00202:Aminotransferase class-III; PF00202:Aminotransferase class-III	-	-	-	S	Biotin metabolism	-	-	-	GO:0008483,transaminase activity; GO:0030170,pyridoxal phosphate binding; GO:0004015,adenosylmethionine-8-amino-7-oxononanoate transaminase activity	2.6.1.62	-	0.0054	1	0.15	0.64	-0.25	0.65	0.15	0.66	1.5	6.4e-12	1.1	4e-07
1381	PF01450:Acetohydroxy acid isomeroreductase, catalytic domain; PF07991:Acetohydroxy acid isomeroreductase, NADPH-binding domain	-	-	-	-	Valine, leucine and isoleucine biosynthesis; Pantothenate and CoA biosynthesis	-	-	-	GO:0004455,ketol-acid reductoisomerase activity; GO:0009082,branched chain family amino acid biosynthetic process; GO:0016491,oxidoreductase activity; GO:0003824,catalytic activity; GO:0005488,binding; GO:0008152,metabolic process	1.1.1.86	-	-0.35	1	1.1	0.04	-0.045	0.98	1.5	0.005	1.5	0.00064	0.35	0.48
1382	PF01284:Membrane-associating domain	-	-	-	-	-	-	-	-	-	-	-	0.15	0.94	0.18	0.23	0.35	0.045	0.03	0.88	0.47	9.9e-05	0.63	1.6e-07
1383	-	-	-	-	-	Glycolysis / Gluconeogenesis; D-Arginine and D-ornithine metabolism	-	-	-	GO:0004365,glyceraldehyde-3-phosphate dehydrogenase (phosphorylating) activity; GO:0008943,glyceraldehyde-3-phosphate dehydrogenase activity	1.2.1.12	-	0.036	1	-0.086	0.73	-0.016	0.98	-0.12	0.62	0.58	0.00084	0.65	0.00018
1384	-	-	-	-	-	-	-	-	-	-	-	-	0.12	1	-0.036	0.95	0.77	0.14	-0.15	0.78	-0.87	0.0085	-0.069	0.87
1385	-	-	-	-	S	-	-	-	-	GO:0005622,intracellular; GO:0008270,zinc ion binding	-	-	0.39	-	1	0.094	0.75	-	0.64	0.33	-1	0.012	-1.3	0.011
1386	PF01464:Transglycosylase SLT domain	-	-	GH23	S	-	-	-	-	-	-	-	-0.54	0.83	-0.53	0.21	-0.63	0.25	0.013	0.99	-1.6	7.3e-07	-1.7	1.2e-07
1387	-	-	-	-	-	-	-	-	-	-	-	-	-0.19	0.99	-0.4	0.072	-0.23	0.54	-0.21	0.38	-0.44	0.016	-0.27	0.15
1388	-	-	-	-	-	-	-	-	-	-	-	-	0.41	-	-0.8	0.23	1.4	-	-1.2	0.066	-0.72	0.2	1.5	0.012
1389	-	-	-	-	-	-	-	-	-	-	-	-	-	-	-	-	-	-	-	-	-	-	-	-
1390	-	-	-	-	-	-	-	-	-	-	-	-	-0.08	1	-0.1	0.79	0.068	0.96	-0.02	0.97	1	0.00037	1.2	3.3e-05
1391	PF05995:Cysteine dioxygenase type I	-	-	-	-	-	-	-	-	-	-	-	-0.4	1	-0.25	0.72	1.7	0.0045	0.15	0.84	-5.3	4.5e-34	-3.4	2.1e-14
1392	PF00501:AMP-binding enzyme	-	-	-	S	-	-	-	-	GO:0003824,catalytic activity; GO:0008152,metabolic process	-	-	0.011	1	2.3	0.00086	0.78	0.53	2.3	0.0009	1.7	0.0063	0.12	0.87
1393	-	-	-	-	-	-	-	-	-	GO:0003676,nucleic acid binding; GO:0008270,zinc ion binding	-	-	0.14	1	1.5	0.00092	0.55	0.49	1.3	0.0033	0.99	0.0093	0.07	0.89
1394	PF00005:ABC transporter; PF00005:ABC transporter; PF00664:ABC transporter transmembrane region; PF00664:ABC transporter transmembrane region	-	-	-	-	-	3.A.1.208.12	-	-	GO:0005524,ATP binding; GO:0006810,transport; GO:0016021,integral to membrane; GO:0042626,ATPase activity, coupled to transmembrane movement of substances; GO:0016887,ATPase activity; GO:0000166,nucleotide binding; GO:0017111,nucleoside-triphosphatase activity	-	-	0.18	1	0.33	0.48	0.41	0.58	0.15	0.78	1.5	2.1e-05	1.5	6.9e-06
1395	PF06246:Isy1-like splicing family	-	-	-	-	-	-	-	-	-	-	-	-0.19	0.95	-0.045	0.85	0.2	0.52	0.14	0.48	-0.28	0.066	-0.037	0.84
1396	-	-	-	-	-	-	-	-	-	-	-	-	-0.15	1	-0.28	0.47	0.21	0.79	-0.13	0.78	-0.38	0.2	0.1	0.75
1397	PF01476:LysM domain; PF01476:LysM domain; PF01476:LysM domain; PF01476:LysM domain; PF01476:LysM domain; PF01476:LysM domain	-	-	CBM50; CBM50; CBM50; CBM50; CBM50; CBM50	S	-	-	-	-	GO:0016998,cell wall catabolic process	-	-	1.5	0.17	-2	0.0011	-0.12	0.95	-3.5	6.1e-10	0.18	0.77	2	0.0001
1398	PF00704:Glycosyl hydrolases family 18; PF00187:Chitin recognition protein	-	-	CBM18; CBM18; GH18	S	Aminosugars metabolism	-	-	-	GO:0008061,chitin binding; GO:0004553,hydrolase activity, hydrolyzing O-glycosyl compounds; GO:0005975,carbohydrate metabolic process; GO:0004568,chitinase activity; GO:0006032,chitin catabolic process; GO:0008843,endochitinase activity	3.2.1.14	-	0.45	0.99	-1.5	0.0032	0.59	0.49	-1.9	5.5e-05	-0.43	0.34	1.6	0.00011
1399	PF00400:WD domain, G-beta repeat; PF00400:WD domain, G-beta repeat; PF00400:WD domain, G-beta repeat; PF00400:WD domain, G-beta repeat; PF00400:WD domain, G-beta repeat; PF00400:WD domain, G-beta repeat; PF00400:WD domain, G-beta repeat	-	-	-	S	-	-	-	-	-	-	-	-0.76	0.96	-0.32	0.73	0.085	0.97	0.43	0.63	-2.9	2e-06	-2.5	5.1e-05
1400	PF00400:WD domain, G-beta repeat; PF00400:WD domain, G-beta repeat; PF00400:WD domain, G-beta repeat; PF00400:WD domain, G-beta repeat; PF00400:WD domain, G-beta repeat; PF00400:WD domain, G-beta repeat; PF00400:WD domain, G-beta repeat; PF00400:WD domain, G-beta repeat; PF00400:WD domain, G-beta repeat; PF00400:WD domain, G-beta repeat; PF00400:WD domain, G-beta repeat; PF00400:WD domain, G-beta…	-	-	-	S	-	-	-	-	-	-	-	0.36	0.94	-0.53	0.13	0.0037	1	-0.9	0.0077	0.1	0.75	0.64	0.028
1401	-	-	-	-	-	-	-	-	-	-	-	-	0	-	-0.23	-	0.32	-	-0.22	0.87	-0.38	0.69	0.17	0.87
1402	-	-	-	-	-	-	-	-	-	-	-	-	-0.16	-	0.21	-	0	-	0.37	0.81	0.2	0.84	0	1
1403	-	-	-	-	S	-	-	-	-	-	-	-	0.33	1	-0.5	0.42	-0.091	0.96	-0.83	0.15	2.1	3.3e-06	2.5	2.5e-08
1404	PF12223:Protein of unknown function (DUF3602)	-	-	-	-	-	-	-	-	GO:0015078,hydrogen ion transmembrane transporter activity; GO:0016469,proton-transporting two-sector ATPase complex	-	-	0.34	1	-0.63	0.22	0.16	0.91	-0.97	0.048	4.3	1.2e-27	5	2.1e-38
1405	-	-	-	-	S	-	-	-	-	-	-	-	0.75	0.4	0.4	0.35	-0.13	0.92	-0.35	0.44	1.1	0.0013	0.57	0.12
1406	PF13445:RING-type zinc-finger; PF01485:IBR domain, a half RING-finger domain	-	-	-	-	-	-	-	-	GO:0005515,protein binding; GO:0008270,zinc ion binding	-	-	0.054	1	0.16	0.47	0.38	0.15	0.11	0.66	-0.0014	1	0.22	0.23
1407	PF00642:Zinc finger C-x8-C-x5-C-x3-H type (and similar); PF13445:RING-type zinc-finger; PF18044:CCCH-type zinc finger; PF01485:IBR domain, a half RING-finger domain; PF01485:IBR domain, a half RING-finger domain	-	-	-	-	-	-	-	-	GO:0003676,nucleic acid binding; GO:0008270,zinc ion binding; GO:0005515,protein binding	-	-	0.078	1	-0.4	0.2	0.14	0.86	-0.47	0.11	-0.28	0.29	0.26	0.32
1408	-	-	-	-	S	-	-	-	-	-	-	-	0.69	0.37	-0.83	0.016	-0.22	0.78	-1.5	1.3e-06	0.29	0.35	0.9	0.0017
1409	-	-	-	-	-	-	-	-	-	-	-	-	0.28	0.98	0.31	0.36	-0.22	0.73	0.022	0.97	-0.13	0.65	-0.66	0.011
1410	PF07690:Major Facilitator Superfamily	-	-	-	S	-	2.A.1.2.33	-	-	GO:0003700,transcription factor activity; GO:0005622,intracellular; GO:0006355,regulation of transcription, DNA-dependent; GO:0043565,sequence-specific DNA binding; GO:0004553,hydrolase activity, hydrolyzing O-glycosyl compounds; GO:0005975,carbohydrate metabolic process	-	-	0.041	1	-1.4	0.021	0.057	0.98	-1.5	0.017	0.52	0.34	2	9.3e-05
1411	-	-	-	-	-	-	-	-	-	-	-	-	0.4	1	-1.4	0.075	0.2	0.94	-1.8	0.02	1.4	0.039	3	4.1e-06
1412	PF17667:Fungal protein kinase	-	-	-	-	-	-	-	-	GO:0004672,protein kinase activity; GO:0005524,ATP binding; GO:0006468,protein amino acid phosphorylation; GO:0004674,protein serine/threonine kinase activity	-	-	0.19	0.99	0.36	0.11	0.47	0.1	0.17	0.48	0.53	0.0037	0.63	0.0007
1413	PF03595:Voltage-dependent anion channel	-	-	-	S	-	2.A.16.4.2	-	-	GO:0005529,sugar binding; GO:0016021,integral to membrane	-	-	-0.066	1	0.52	0.27	0.19	0.88	0.58	0.2	0.41	0.29	0.08	0.86
1414	PF00909:Ammonium Transporter Family	-	-	-	S	-	1.A.11.3.3	-	-	GO:0006810,transport; GO:0008519,ammonium transmembrane transporter activity; GO:0016020,membrane	-	-	0.21	1	0.15	0.72	-0.54	0.25	-0.064	0.89	2.1	5.4e-15	1.4	2e-07
1415	PF07859:alpha/beta hydrolase fold	-	-	-	-	2,4-Dichlorobenzoate degradation; Pentose and glucuronate interconversions; Butanoate metabolism	-	MER254862	-	GO:0008152,metabolic process; GO:0016787,hydrolase activity; GO:0004620,phospholipase activity; GO:0016298,lipase activity; GO:0018731,1-oxa-2-oxocycloheptane lactonase activity; GO:0018732,sulfolactone hydrolase activity; GO:0018733,3,4-dihydrocoumarin hydrolase activity; GO:0018734,butyrolactone hydrolase activity	3.1.1.-	-	0.8	0.25	-0.35	0.35	-0.12	0.9	-1.2	0.00088	-0.56	0.055	-0.33	0.28
1416	-	-	-	-	S	-	-	-	-	-	-	-	-0.25	-	-0.47	0.55	-0.12	-	-0.23	0.8	0.084	0.91	0.44	0.5
1417	PF11538:Snurportin1	-	-	-	S	-	-	-	-	-	-	-	-0.032	1	-0.19	0.36	0.21	0.53	-0.16	0.45	-0.5	0.0018	-0.092	0.62
1418	PF04577:Protein of unknown function (DUF563)	-	-	-	S	-	-	-	-	-	-	-	-0.18	0.9	-0.12	0.47	-0.13	0.65	0.057	0.77	0.47	0.00017	0.46	0.00027
1419	PF10294:Lysine methyltransferase	-	-	-	-	-	-	-	-	-	-	-	-0.092	1	-0.067	0.71	-0.13	0.62	0.026	0.9	-0.36	0.0025	-0.43	0.00037
1420	-	-	-	-	-	-	-	-	-	-	-	-	0.034	1	0.25	0.34	-0.46	0.19	0.22	0.41	1.3	6.9e-11	0.62	0.0027
1421	PF06544:Protein of unknown function (DUF1115); PF08572:pre-mRNA processing factor 3 (PRP3)	-	-	-	-	-	-	-	-	-	-	-	0.13	1	0.18	0.37	0.33	0.21	0.057	0.82	0.43	0.0065	0.58	0.00031
1422	-	-	-	-	-	-	-	-	-	-	-	-	-0.086	1	0.46	0.2	-0.22	0.77	0.54	0.12	0.41	0.16	-0.27	0.4
1423	PF00252:Ribosomal protein L16p/L10e	-	-	-	S	-	-	-	-	GO:0003735,structural constituent of ribosome; GO:0005622,intracellular; GO:0005840,ribosome; GO:0006412,translation	-	-	-0.086	1	0.24	0.4	-0.31	0.48	0.32	0.23	0.7	0.0011	0.15	0.52
1424	PF06058:Dcp1-like decapping family	-	-	-	-	-	-	-	-	-	-	-	-0.084	1	-0.073	0.76	0.24	0.48	0.011	0.97	0.48	0.0031	0.8	9.4e-07
1425	-	-	-	-	-	-	-	-	-	-	-	-	0.02	1	0.23	0.64	-0.036	0.98	0.21	0.68	0.094	0.81	-0.17	0.67
1426	-	-	-	-	-	-	-	-	-	-	-	-	0.32	-	0.18	0.82	-0.35	-	-0.14	0.94	-2.8	1.7e-07	-3.3	5e-08
1427	-	-	-	-	S	-	-	-	-	-	-	-	-0.28	-	-0.12	-	-0.13	-	0.15	0.91	-1.5	0.13	-1.5	0.15
1428	PF00097:Zinc finger, C3HC4 type (RING finger)	-	-	-	-	-	-	-	-	GO:0005515,protein binding; GO:0008270,zinc ion binding	-	-	-0.37	0.77	-0.58	0.023	0.23	0.63	-0.21	0.47	0.26	0.24	1.1	2.5e-07
1429	PF00022:Actin; PF00022:Actin	-	-	-	S	-	-	-	-	GO:0005515,protein binding	-	-	0.091	1	0.0073	0.98	0.1	0.83	-0.084	0.74	-0.057	0.76	0.039	0.85
1430	PF00454:Phosphatidylinositol 3- and 4-kinase; PF02260:FATC domain; PF08771:FKBP12-rapamycin binding domain; PF11865:Domain of unknown function (DUF3385); PF02259:FAT domain	-	-	-	S	Inositol phosphate metabolism	-	-	-	GO:0016773,phosphotransferase activity, alcohol group as acceptor; GO:0016772,transferase activity, transferring phosphorus-containing groups; GO:0005488,binding; GO:0015072,phosphatidylinositol 3-kinase, class I, catalyst activity; GO:0015073,phosphatidylinositol 3-kinase, class I, regulator activity; GO:0016303,1-phosphatidylinositol-3-kinase activity	2.7.1.137	-	0.16	1	-0.48	0.11	0.37	0.42	-0.64	0.027	-0.56	0.022	0.29	0.26
1431	PF00494:Squalene/phytoene synthase	-	-	-	S	Sterol biosynthesis; Terpenoid biosynthesis	-	-	-	GO:0009058,biosynthetic process; GO:0016740,transferase activity; GO:0004310,farnesyl-diphosphate farnesyltransferase activity; GO:0008610,lipid biosynthetic process; GO:0016021,integral to membrane	2.5.1.21	-	-0.15	1	0.29	0.19	0.3	0.33	0.44	0.036	-0.62	0.00028	-0.61	0.00044
1432	PF00628:PHD-finger; PF00415:Regulator of chromosome condensation (RCC1) repeat; PF00415:Regulator of chromosome condensation (RCC1) repeat; PF00415:Regulator of chromosome condensation (RCC1) repeat	-	-	-	-	Tryptophan metabolism; Ubiquinone biosynthesis	-	-	-	GO:0005515,protein binding; GO:0008270,zinc ion binding; GO:0008766,UDP-N-acetylmuramoylalanyl-D-glutamyl-2,6-diaminopimelate-D-alanyl-D-alanine ligase activity; GO:0018169,ribosomal S6-glutamic acid ligase activity; GO:0043773,coenzyme F420-0 gamma-glutamyl ligase activity; GO:0043774,coenzyme F420-2 alpha-glutamyl ligase activity	6.3.2.-	-	-0.038	1	0.005	0.98	-0.021	0.97	0.043	0.85	0.4	0.0053	0.37	0.01
1433	-	-	-	-	S	-	-	-	-	-	-	-	-0.13	1	0.22	0.55	-0.056	0.96	0.35	0.31	0.3	0.28	0.029	0.93
1434	PF12937:F-box-like	-	-	-	S	-	-	-	-	-	-	-	-0.085	1	-0.44	0.076	-0.22	0.64	-0.36	0.15	0.063	0.8	0.28	0.19
1435	-	-	-	-	-	-	-	-	-	-	-	-	-0.44	0.78	0.2	0.59	-0.34	0.5	0.64	0.043	-0.72	0.0049	-1.3	7.6e-07
1436	PF09445:RNA cap guanine-N2 methyltransferase; PF09445:RNA cap guanine-N2 methyltransferase	-	-	-	S	-	-	-	-	GO:0008152,metabolic process; GO:0008168,methyltransferase activity	-	-	-0.068	1	0.61	0.053	-0.069	0.95	0.68	0.029	0.89	0.00062	0.21	0.47
1437	PF00076:RNA recognition motif. (a.k.a. RRM, RBD, or RNP domain)	-	-	-	-	-	-	-	-	GO:0003676,nucleic acid binding	-	-	-0.078	1	0.12	0.68	0.12	0.86	0.2	0.48	1.4	4.5e-11	1.4	5.5e-11
1438	PF04389:Peptidase family M28	-	-	-	S	-	-	-	-	GO:0006508,proteolysis; GO:0008233,peptidase activity	-	-	0.19	1	0.62	0.058	0.15	0.86	0.43	0.2	0.27	0.34	-0.19	0.51
1439	PF07690:Major Facilitator Superfamily	-	-	-	-	-	2.A.1.13.4	-	-	GO:0005215,transporter activity; GO:0006810,transport; GO:0016021,integral to membrane	-	-	-0.22	1	0.43	0.15	-0.013	0.99	0.65	0.022	1.9	1.4e-15	1.4	1.7e-09
1440	-	-	-	-	-	-	-	-	-	GO:0005515,protein binding	-	-	-0.27	1	-1	0.017	0.14	0.91	-0.74	0.087	-1	0.0036	0.12	0.77
1441	PF01494:FAD binding domain	-	-	-	S	Fluorene degradation; Nitorobenzene degradation	-	-	-	GO:0008152,metabolic process; GO:0016491,oxidoreductase activity; GO:0018658,salicylate 1-monooxygenase activity	1.14.13.1	Fenton	0.57	0.77	-0.12	0.81	-0.044	0.98	-0.68	0.082	2.2	1.1e-10	2.3	1.4e-11
1442	-	-	-	-	S	-	-	-	-	-	-	-	0.11	1	0.088	0.87	-0.86	0.044	-0.024	0.97	-2.7	7e-19	-3.7	2.9e-32
1443	-	-	-	-	S	-	-	-	-	-	-	-	0.16	1	0.16	0.62	-0.56	0.043	-0.0031	1	-1.2	5.9e-09	-1.9	2.2e-20
1444	PF07690:Major Facilitator Superfamily	-	-	-	-	-	2.A.1.2.16	-	-	GO:0005215,transporter activity; GO:0006810,transport; GO:0016021,integral to membrane	-	-	-0.46	1	4	2.6e-05	-0.24	0.94	4.5	2e-06	4.1	1.4e-06	-0.19	0.85
1445	PF08534:Redoxin	-	-	-	-	-	-	-	-	GO:0016491,oxidoreductase activity; GO:0051920,peroxiredoxin activity	1.11.1.15	-	0.045	1	0.92	0.035	-0.34	0.7	0.87	0.045	1.8	2.4e-07	0.56	0.14
1446	PF17667:Fungal protein kinase; PF17667:Fungal protein kinase	-	-	-	-	-	-	-	-	GO:0004713,protein-tyrosine kinase activity; GO:0005524,ATP binding; GO:0006468,protein amino acid phosphorylation	-	-	-0.037	1	0.093	0.77	0.6	0.057	0.13	0.67	-0.14	0.55	0.37	0.11
1447	PF01513:ATP-NAD kinase	-	-	-	-	-	-	-	-	GO:0003951,NAD+ kinase activity; GO:0008152,metabolic process	-	-	0.12	1	0.16	0.39	0.7	2.7e-05	0.039	0.87	-0.46	0.00077	0.079	0.63
1448	-	-	-	-	S	-	-	-	-	-	-	-	-0.0046	1	-0.13	0.71	-0.33	0.51	-0.13	0.73	0.076	0.79	-0.12	0.67
1449	-	-	-	-	-	-	-	-	-	-	-	-	0.4	-	-1.1	0.25	-0.51	-	-1.5	0.12	-3.9	1.7e-09	-3.4	1.9e-09
1450	PF00505:HMG (high mobility group) box	TF	-	-	-	-	-	-	-	GO:0003677,DNA binding; GO:0006355,regulation of transcription, DNA-dependent; GO:0004402,histone acetyltransferase activity	2.3.1.48	-	-0.26	1	0.37	0.35	0.36	0.63	0.63	0.078	1.1	0.00049	1.1	0.00091
1451	PF17667:Fungal protein kinase; PF17667:Fungal protein kinase	-	-	-	-	-	-	-	-	GO:0004713,protein-tyrosine kinase activity; GO:0005524,ATP binding; GO:0006468,protein amino acid phosphorylation	-	-	0.086	-	1.1	0.15	-0.2	-	1	0.18	-0.54	0.34	-1.8	0.0027
1452	-	-	-	-	-	-	-	-	-	-	-	-	0.12	1	0.74	0.007	-0.36	0.45	0.63	0.025	0.91	0.0001	-0.2	0.46
1453	-	-	-	-	S	-	-	-	-	-	-	-	0.093	1	0.68	0.25	0.73	0.57	0.58	0.33	2.3	8.4e-06	2.3	3e-05
1454	-	-	-	-	-	-	-	-	-	-	-	-	0.044	1	0.49	0.44	0.94	-	0.44	0.49	-0.67	0.14	-0.22	0.7
1455	-	-	-	-	-	-	-	-	-	-	-	-	-0.57	0.98	-0.47	0.48	-0.071	0.97	0.1	0.9	-0.39	0.47	0.0097	0.99
1456	PF00107:Zinc-binding dehydrogenase; PF08240:Alcohol dehydrogenase GroES-like domain; PF00135:Carboxylesterase family	-	-	-	S	-	-	-	-	GO:0003824,catalytic activity; GO:0005488,binding; GO:0008152,metabolic process	-	-	0.19	1	-0.33	0.63	-0.11	0.95	-0.51	0.42	1.4	0.0037	1.6	0.00079
1457	PF00450:Serine carboxypeptidase	-	-	-	S	-	-	MER296755	-	GO:0004185,serine carboxypeptidase activity; GO:0006508,proteolysis	3.4.16.-	-	0.21	0.94	0.28	0.17	-0.049	0.94	0.072	0.78	-0.63	7.8e-05	-0.96	1.3e-09
1458	-	-	-	-	S	-	-	-	-	-	-	-	0.012	1	0.3	0.54	0.39	0.57	0.28	0.56	-0.97	0.0027	-0.88	0.013
1459	-	-	-	-	-	-	-	-	-	-	-	-	-0.49	0.96	-0.46	0.4	0.091	0.95	0.027	0.97	-2.2	8.7e-09	-1.6	2.1e-05
1460	-	-	-	-	-	-	-	-	-	-	-	-	-0.82	-	0.67	-	-0.38	-	1.5	0.3	0.12	0.92	-0.92	0.45
1461	-	-	-	-	-	-	-	-	-	-	-	-	-0.79	-	-0.33	-	-0.82	-	0.46	0.72	-2.7	0.012	-3.2	0.0055
1462	-	-	-	-	-	-	-	-	-	-	-	-	0.35	-	-0.68	0.32	-0.061	-	-1	0.13	-1.2	0.015	-0.62	0.23
1463	-	-	-	-	-	-	-	-	-	-	-	-	1.1	0.91	3.4	0.00077	-1.5	0.23	2.3	0.012	-1.2	0.11	-6.1	1.4e-09
1464	PF02099:Josephin	-	-	-	-	-	-	-	-	-	-	-	-0.12	1	0.12	0.76	-0.32	0.64	0.24	0.51	1.8	1.8e-10	1.3	1.2e-06
1465	PF09451:Autophagy-related protein 27	-	-	-	S	-	-	-	-	GO:0005515,protein binding	-	-	-0.18	0.84	0.0026	0.99	0.15	0.55	0.19	0.2	-0.28	0.016	-0.14	0.28
1466	-	-	-	-	-	-	-	-	-	-	-	-	-0.049	1	-0.72	0.15	-0.18	0.9	-0.67	0.17	0.042	0.93	0.58	0.17
1467	PF00248:Aldo/keto reductase family	-	-	-	S	-	8.A.5.1.1	-	-	GO:0016491,oxidoreductase activity; GO:0006813,potassium ion transport; GO:0016021,integral to membrane; GO:0047681,aryl-alcohol dehydrogenase (NADP+) activity	1.1.1.91	-	-0.6	1	4.2	7.1e-07	-0.32	0.91	4.8	1.2e-08	2.6	0.0012	-2	0.012
1468	PF00067:Cytochrome P450; PF00067:Cytochrome P450	-	CYP51	-	S	Tryptophan metabolism; Fatty acid metabolism; gamma-Hexachlorocyclohexane degradation	-	-	-	GO:0004497,monooxygenase activity; GO:0005506,iron ion binding; GO:0006118,electron transport; GO:0020037,heme binding; GO:0050381,unspecific monooxygenase activity	1.14.14.1	-	0.44	1	-1.1	0.22	-1.4	0.26	-1.5	0.072	-1.3	0.065	-1.6	0.03
1469	PF04119:Heat shock protein 9/12	-	-	-	-	-	-	-	-	GO:0006950,response to stress	-	-	-1.1	0.98	0.11	0.94	-0.73	0.81	1.2	0.33	-2.5	0.012	-3.4	0.00081
1470	PF13639:Ring finger domain	-	-	-	S	-	-	-	-	GO:0005515,protein binding; GO:0008270,zinc ion binding	-	-	-0.053	1	-0.28	0.57	-0.6	0.35	-0.23	0.66	0.13	0.75	-0.19	0.63
1471	-	-	-	-	-	-	-	-	-	-	-	-	0.48	-	1.1	-	0.47	-	0.62	0.52	1.7	0.025	1	0.2
1472	PF00067:Cytochrome P450	-	CYP51	-	S	Tryptophan metabolism; Fatty acid metabolism; gamma-Hexachlorocyclohexane degradation	-	-	-	GO:0001584,rhodopsin-like receptor activity; GO:0007186,G-protein coupled receptor protein signaling pathway; GO:0016021,integral to membrane; GO:0004497,monooxygenase activity; GO:0005506,iron ion binding; GO:0006118,electron transport; GO:0020037,heme binding; GO:0050381,unspecific monooxygenase activity	1.14.14.1	-	0.96	0.14	1.8	6.8e-07	0.34	0.65	0.8	0.044	0.98	0.0026	-0.44	0.21
1473	PF00067:Cytochrome P450	-	CYP51	-	S	Tryptophan metabolism; Fatty acid metabolism; gamma-Hexachlorocyclohexane degradation	-	-	-	GO:0001584,rhodopsin-like receptor activity; GO:0007186,G-protein coupled receptor protein signaling pathway; GO:0016021,integral to membrane; GO:0004497,monooxygenase activity; GO:0005506,iron ion binding; GO:0006118,electron transport; GO:0020037,heme binding; GO:0050381,unspecific monooxygenase activity	1.14.14.1	-	0.25	0.94	0.35	0.15	0.27	0.51	0.1	0.73	0.13	0.55	0.044	0.86
1474	PF00067:Cytochrome P450	-	CYP51	-	S	gamma-Hexachlorocyclohexane degradation; Ascorbate and aldarate metabolism; Flavonoids, stilbene and lignin biosynthesis; Fluorene degradation	-	-	-	GO:0001584,rhodopsin-like receptor activity; GO:0007186,G-protein coupled receptor protein signaling pathway; GO:0016021,integral to membrane; GO:0004497,monooxygenase activity; GO:0005506,iron ion binding; GO:0006118,electron transport; GO:0020037,heme binding; GO:0018585,fluorene oxygenase activity; GO:0018586,mono-butyltin dioxygenase activity; GO:0018587,limonene 8-monooxygenase activity; GO:…	1.14.-.-	-	0.46	0.3	0.55	0.012	0.025	0.98	0.093	0.74	2	3.4e-27	1.5	3.3e-15
1475	-	-	-	-	-	-	-	-	-	-	-	-	-0.52	-	-0.0064	-	-0.64	-	0.51	0.59	-0.93	0.16	-1.6	0.02
1476	PF13639:Ring finger domain	-	-	-	-	Starch and sucrose metabolism	-	-	-	GO:0005515,protein binding; GO:0008270,zinc ion binding; GO:0004339,glucan 1,4-alpha-glucosidase activity	3.2.1.3	-	0.16	1	-0.39	0.044	0.17	0.64	-0.55	0.0031	0.1	0.57	0.66	2.8e-05
1477	-	-	-	-	-	-	-	-	-	-	-	-	-0.46	0.81	-0.63	0.067	-0.095	0.93	-0.17	0.69	-0.81	0.0036	-0.28	0.35
1478	PF16499:Alpha galactosidase A; PF17801:Alpha galactosidase C-terminal beta sandwich domain	-	-	GH27	-	Galactose metabolism; Glycerolipid metabolism; Globoside metabolism; Sphingoglycolipid metabolism	-	-	-	GO:0004553,hydrolase activity, hydrolyzing O-glycosyl compounds; GO:0005975,carbohydrate metabolic process; GO:0004557,alpha-galactosidase activity	3.2.1.22	-	-0.085	1	-0.33	0.28	-0.36	0.42	-0.25	0.43	-1.8	3.8e-16	-1.9	1.6e-16
1479	PF00501:AMP-binding enzyme; PF13193:AMP-binding enzyme C-terminal domain	-	-	-	-	Flavonoids, stilbene and lignin biosynthesis	4.C.1.1.7	-	-	GO:0003824,catalytic activity; GO:0008152,metabolic process; GO:0016207,4-coumarate-CoA ligase activity	6.2.1.12	-	-0.18	1	-0.9	0.031	0.16	0.89	-0.73	0.084	-0.42	0.25	0.65	0.073
1480	PF00067:Cytochrome P450	-	CYP51	-	S	gamma-Hexachlorocyclohexane degradation; Ascorbate and aldarate metabolism; Flavonoids, stilbene and lignin biosynthesis; Fluorene degradation	-	-	-	GO:0004497,monooxygenase activity; GO:0005506,iron ion binding; GO:0006118,electron transport; GO:0020037,heme binding; GO:0018585,fluorene oxygenase activity; GO:0018586,mono-butyltin dioxygenase activity; GO:0018587,limonene 8-monooxygenase activity; GO:0018588,tri-n-butyltin dioxygenase activity; GO:0018589,di-n-butyltin dioxygenase activity; GO:0018590,methylsilanetriol hydroxylase activity; …	1.14.-.-	-	-2	1e-05	-1.8	5.5e-06	-0.22	0.83	0.15	0.79	-2.7	2.8e-14	-1.1	0.0026
1481	-	-	-	-	-	-	-	-	-	-	-	-	-0.12	1	0.73	0.07	0.09	0.95	0.85	0.032	1.2	0.00037	0.52	0.13
1482	PF11380:Stealth protein CR2, conserved region 2; PF17102:Stealth protein CR3, conserved region 3	-	-	-	S	-	-	-	-	GO:0003976,UDP-N-acetylglucosamine-lysosomal-enzyme N-acetylglucosaminephosphotransferase activity	2.7.8.17	-	0.25	0.88	0.17	0.44	-0.14	0.76	-0.079	0.76	0.99	2.3e-09	0.68	5.4e-05
1483	PF08495:FIST N domain	-	-	-	S	-	-	-	-	-	-	-	-0.014	1	0.57	0.016	-0.037	0.96	0.59	0.013	-0.022	0.93	-0.63	0.0015
1484	PF01546:Peptidase family M20/M25/M40; PF07687:Peptidase dimerisation domain; PF00400:WD domain, G-beta repeat	-	-	-	-	-	-	-	-	GO:0006508,proteolysis; GO:0008237,metallopeptidase activity; GO:0016787,hydrolase activity; GO:0046983,protein dimerization activity	-	-	0.16	0.95	-0.077	0.69	-0.043	0.94	-0.24	0.14	0.22	0.11	0.25	0.067
1485	-	-	-	-	S	-	-	-	-	-	-	-	0.24	1	0.074	0.88	-0.34	0.64	-0.16	0.74	-0.47	0.15	-0.88	0.0061
1486	PF00005:ABC transporter	-	-	-	S	-	3.A.1.208.12	-	-	GO:0005524,ATP binding; GO:0016887,ATPase activity; GO:0000166,nucleotide binding; GO:0017111,nucleoside-triphosphatase activity; GO:0006810,transport; GO:0016021,integral to membrane; GO:0042626,ATPase activity, coupled to transmembrane movement of substances	-	-	0.5	0.25	0.34	0.15	0.032	0.97	-0.16	0.53	0.83	8e-06	0.52	0.0059
1487	-	-	-	-	-	-	-	-	-	-	-	-	0	-	-0.74	-	-0.44	-	-0.72	0.67	-1.8	0.12	-1.5	0.25
1488	-	-	-	-	-	-	-	-	-	-	-	-	0	-	-0.85	0.56	-0.071	-	-0.85	0.57	-5.5	7.2e-08	-4.7	1.7e-05
1489	-	-	-	-	-	-	-	-	-	-	-	-	1.4	0.021	0.051	0.91	0.28	0.6	-1.3	0.0051	-4.3	3e-55	-4.1	1.4e-42
1490	PF01261:Xylose isomerase-like TIM barrel	-	-	-	-	-	-	-	-	-	-	-	-0.15	1	0.19	0.75	0.42	0.65	0.34	0.55	-2.5	2.3e-10	-2.3	1.4e-08
1491	-	-	-	-	-	-	-	-	-	-	-	-	-1.5	0.4	0.38	0.68	0.63	0.69	1.9	0.015	-4.8	4.6e-14	-4.5	1.4e-12
1492	PF13415:Galactose oxidase, central domain; PF13964:Kelch motif; PF13422:Domain of unknown function (DUF4110)	-	-	-	-	Fatty acid metabolism	-	-	-	GO:0004467,long-chain-fatty-acid-CoA ligase activity; GO:0015645,fatty-acid ligase activity; GO:0031955,short-chain-fatty-acid-CoA ligase activity; GO:0031956,medium-chain-fatty-acid-CoA ligase activity; GO:0031957,very-long-chain-fatty-acid-CoA ligase activity	6.2.1.3	-	-0.13	1	0.43	0.29	0.41	0.57	0.56	0.14	1.4	3.6e-06	1.4	7.7e-06
1493	PF02517:CPBP intramembrane metalloprotease	-	-	-	S	-	-	MER138293	-	GO:0004197,cysteine-type endopeptidase activity	3.4.22.-	-	-0.21	0.98	0.044	0.89	-0.21	0.62	0.26	0.3	-1.3	4.9e-13	-1.6	1.8e-17
1494	-	-	-	-	-	-	-	-	-	-	-	-	-0.069	1	-0.54	0.0026	-0.12	0.74	-0.47	0.0097	-1.6	8.6e-29	-1.2	2.5e-16
1495	PF03070:TENA/THI-4/PQQC family	-	-	-	-	-	-	-	-	-	-	-	0.23	1	-1.2	0.03	-0.63	0.48	-1.4	0.0077	-3	2.5e-12	-2.5	1.1e-08
1496	PF13409:Glutathione S-transferase, N-terminal domain; PF13410:Glutathione S-transferase, C-terminal domain	-	-	-	S	-	-	-	-	-	-	-	-0.17	1	0.2	0.56	-0.21	0.75	0.37	0.24	0.89	0.00038	0.48	0.067
1497	-	-	-	-	S	-	-	-	-	-	-	-	-0.43	1	-0.26	0.8	0.41	-	0.16	0.89	0.12	0.88	0.8	0.28
1498	-	-	-	-	S	-	-	-	-	-	-	-	-0.25	1	-0.24	0.49	0.23	0.72	0.0053	0.99	-0.97	0.00015	-0.5	0.062
1499	PF00240:Ubiquitin family	-	-	-	S	-	-	-	-	GO:0006464,protein modification process	-	-	-0.034	1	-0.0035	0.99	-0.17	0.73	0.03	0.93	-0.0049	0.99	-0.17	0.42
1500	-	-	-	-	S	-	3.D.1.6.2	-	-	GO:0004497,monooxygenase activity; GO:0005506,iron ion binding; GO:0006118,electron transport; GO:0020037,heme binding	-	-	-0.18	1	0.055	0.9	-0.35	0.54	0.23	0.54	-0.037	0.91	-0.44	0.13
1501	-	-	-	-	-	Starch and sucrose metabolism	-	-	-	GO:0004339,glucan 1,4-alpha-glucosidase activity	3.2.1.3	-	-0.032	1	0.3	0.13	0.6	0.0086	0.34	0.087	1.1	1.1e-11	1.4	2.4e-17
1502	PF10456:WASP-binding domain of Sorting nexin protein; PF00787:PX domain	-	-	-	-	-	-	-	-	GO:0005515,protein binding; GO:0007154,cell communication; GO:0035091,phosphoinositide binding	-	-	0.11	1	-0.15	0.51	-0.27	0.41	-0.26	0.23	0.45	0.0096	0.32	0.066
1503	-	-	-	-	S	-	-	-	-	-	-	-	0.15	1	-0.18	0.64	-0.77	0.052	-0.33	0.37	-0.09	0.78	-0.67	0.017
1504	PF00390:Malic enzyme, N-terminal domain	-	-	-	-	-	-	-	-	GO:0004470,malic enzyme activity; GO:0006108,malate metabolic process; GO:0016616,oxidoreductase activity, acting on the CH-OH group of donors, NAD or NADP as acceptor	-	-	0.1	1	-0.044	0.94	-0.62	0.34	-0.15	0.8	-0.76	0.044	-1.3	0.00027
1505	PF00390:Malic enzyme, N-terminal domain; PF03949:Malic enzyme, NAD binding domain	-	-	-	S	Pyruvate metabolism; Carbon fixation	-	-	-	GO:0004470,malic enzyme activity; GO:0006108,malate metabolic process; GO:0016616,oxidoreductase activity, acting on the CH-OH group of donors, NAD or NADP as acceptor; GO:0051287,NAD binding; GO:0003824,catalytic activity; GO:0005488,binding; GO:0008152,metabolic process; GO:0004473,malate dehydrogenase (oxaloacetate-decarboxylating) (NADP+) activity	1.1.1.40	-	0.22	1	-0.0022	1	-1	0.035	-0.22	0.68	-0.79	0.029	-1.8	1.8e-07
1506	PF00441:Acyl-CoA dehydrogenase, C-terminal domain	-	-	-	-	-	-	-	-	GO:0006118,electron transport; GO:0016627,oxidoreductase activity, acting on the CH-CH group of donors	-	-	0.5	-	0.18	-	-1	-	-0.32	0.81	-1.2	0.088	-2.3	0.00091
1507	PF07690:Major Facilitator Superfamily; PF07690:Major Facilitator Superfamily	-	-	-	-	-	2.A.1.3.1	-	-	GO:0005215,transporter activity; GO:0006810,transport; GO:0016021,integral to membrane	-	-	0.11	1	-0.39	0.32	-0.47	0.43	-0.51	0.18	0.42	0.18	0.35	0.28
1508	PF09139:Phosphatidate cytidylyltransferase, mitochondrial	-	-	-	-	-	-	-	-	-	-	-	-0.17	1	-0.093	0.83	0.2	0.8	0.074	0.87	0.39	0.18	0.68	0.016
1509	PF18265:Nas2 N_terminal domain	-	-	-	-	-	-	-	-	GO:0005515,protein binding	-	-	-0.24	0.94	-0.19	0.43	-0.57	0.034	0.042	0.89	0.72	0.00014	0.34	0.076
1510	PF00334:Nucleoside diphosphate kinase	-	-	-	-	-	-	-	-	GO:0004550,nucleoside diphosphate kinase activity; GO:0005524,ATP binding; GO:0006183,GTP biosynthetic process; GO:0006228,UTP biosynthetic process; GO:0006241,CTP biosynthetic process	-	-	0.099	1	-0.2	0.45	-0.03	0.97	-0.29	0.23	0.59	0.0022	0.76	7.8e-05
1511	PF01946:Thi4 family	-	-	-	S	-	-	-	-	GO:0009228,thiamin biosynthetic process	-	-	0.13	1	-0.39	0.71	-0.19	0.95	-0.53	0.6	-2.8	9.9e-05	-2.6	0.00036
1512	-	-	-	-	-	Phenylalanine, tyrosine and tryptophan biosynthesis	-	-	-	GO:0004106,chorismate mutase activity; GO:0009073,aromatic amino acid family biosynthetic process	5.4.99.5	-	-0.49	0.31	-0.079	0.79	-0.021	0.98	0.41	0.088	0.84	2.3e-05	0.9	5.9e-06
1513	PF00735:Septin; PF00735:Septin; PF00735:Septin	-	-	-	-	-	-	-	-	GO:0005525,GTP binding; GO:0007049,cell cycle	-	-	-0.2	1	-0.43	0.1	-0.15	0.79	-0.23	0.42	-0.85	5.4e-05	-0.57	0.0076
1514	PF00735:Septin; PF00735:Septin; PF00735:Septin; PF00172:Fungal Zn(2)-Cys(6) binuclear cluster domain	TF	-	-	S	-	-	-	-	GO:0005525,GTP binding; GO:0007049,cell cycle; GO:0003700,transcription factor activity; GO:0005634,nucleus; GO:0006355,regulation of transcription, DNA-dependent; GO:0008270,zinc ion binding	-	-	-0.069	1	-0.68	0.073	-0.072	0.95	-0.61	0.11	-0.84	0.0066	-0.23	0.49
1515	PF13041:PPR repeat family; PF13041:PPR repeat family; PF01535:PPR repeat; PF13812:Pentatricopeptide repeat domain	-	-	-	S	-	-	-	-	-	-	-	0.029	1	0.13	0.57	0.21	0.58	0.1	0.67	1.3	1.8e-15	1.4	5.7e-17
1516	PF11754:Velvet factor; PF11754:Velvet factor	-	-	-	-	Starch and sucrose metabolism; Folate biosynthesis	-	-	-	GO:0000810,diacylglycerol pyrophosphate phosphatase activity; GO:0004787,thiamin-pyrophosphatase activity; GO:0008413,8-oxo-7,8-dihydroguanine triphosphatase activity; GO:0008758,UDP-2,3-diacylglucosamine hydrolase activity; GO:0008796,bis(5'-nucleosyl)-tetraphosphatase activity; GO:0008828,dATP pyrophosphohydrolase activity; GO:0016462,pyrophosphatase activity; GO:0019176,dihydroneopterin monoph…	3.6.1.-	-	-0.18	1	-0.46	0.08	0.29	0.53	-0.29	0.3	0.16	0.5	0.91	2.3e-05
1517	PF01412:Putative GTPase activating protein for Arf	-	-	-	-	-	-	-	-	GO:0008060,ARF GTPase activator activity; GO:0008270,zinc ion binding; GO:0032312,regulation of ARF GTPase activity	-	-	0.25	0.77	-0.69	1.1e-05	-0.26	0.34	-0.94	6.1e-10	1.1	1.3e-13	1.5	1.4e-26
1518	PF00646:F-box domain	-	-	-	-	-	-	-	-	-	-	-	0.28	0.98	0.00083	1	0.12	0.9	-0.28	0.39	1.2	6.9e-07	1.4	6e-08
1519	PF00096:Zinc finger, C2H2 type; PF00443:Ubiquitin carboxyl-terminal hydrolase	TF	-	-	-	-	-	-	-	GO:0004221,ubiquitin thiolesterase activity; GO:0006511,ubiquitin-dependent protein catabolic process; GO:0003676,nucleic acid binding; GO:0005622,intracellular; GO:0008270,zinc ion binding	-	-	0.22	0.88	-0.56	0.00081	0.59	0.002	-0.78	8.7e-07	0.18	0.24	1.3	8.9e-21
1520	PF00481:Protein phosphatase 2C	-	-	-	S	-	-	-	-	GO:0003824,catalytic activity; GO:0004721,phosphoprotein phosphatase activity; GO:0004723,calcium-dependent protein serine/threonine phosphatase activity; GO:0004724,magnesium-dependent protein serine/threonine phosphatase activity; GO:0005963,magnesium-dependent protein serine/threonine phosphatase complex; GO:0008420,CTD phosphatase activity; GO:0008597,calcium-dependent protein serine/threonin…	3.1.3.16	-	0.091	1	0.12	0.78	-0.1	0.93	0.033	0.95	1.4	3.1e-06	1.1	0.00011
1521	-	-	-	-	-	-	-	-	-	-	-	-	0.26	1	-0.027	0.95	-0.56	0.29	-0.29	0.4	4.6	4.7e-63	4.1	5e-54
1522	-	-	-	-	-	-	-	-	-	-	-	-	0.64	0.98	1.4	0.049	0.43	0.81	0.79	0.31	3.7	7.9e-10	2.7	1.1e-05
1523	PF12330:Haspin like kinase domain	-	-	-	-	-	-	-	-	GO:0004693,cyclin-dependent protein kinase activity	2.7.11.22	-	0.12	1	0.75	0.16	-0.085	0.96	0.64	0.24	1.6	0.00031	0.73	0.11
1524	PF05916:GINS complex protein	-	-	-	-	-	-	-	-	GO:0005634,nucleus; GO:0006260,DNA replication	-	-	-0.23	0.98	0.42	0.11	-0.0028	1	0.66	0.01	0.56	0.011	0.13	0.59
1525	-	-	-	-	-	-	1.A.4.4.1	-	-	-	-	-	0.13	1	0.32	0.084	-0.063	0.91	0.2	0.32	0.23	0.15	-0.16	0.35
1526	PF04062:ARP2/3 complex ARPC3 (21 kDa) subunit	-	-	-	S	-	-	-	-	GO:0005856,cytoskeleton; GO:0030833,regulation of actin filament polymerization	-	-	-0.16	1	-0.27	0.23	-0.063	0.93	-0.11	0.67	0.31	0.09	0.51	0.0039
1527	PF17146:PIN domain of ribonuclease; PF08772:Nin one binding (NOB1) Zn-ribbon like	-	-	-	S	-	-	-	-	-	-	-	-0.19	1	0.44	0.24	0.16	0.86	0.63	0.074	1.2	4.1e-05	0.92	0.002
1528	PF00180:Isocitrate/isopropylmalate dehydrogenase	-	-	-	-	Valine, leucine and isoleucine biosynthesis	-	-	-	GO:0008152,metabolic process; GO:0016616,oxidoreductase activity, acting on the CH-OH group of donors, NAD or NADP as acceptor; GO:0003862,3-isopropylmalate dehydrogenase activity; GO:0005737,cytoplasm; GO:0009098,leucine biosynthetic process	1.1.1.85	-	-0.049	1	-0.57	0.024	-0.52	0.095	-0.52	0.04	-0.71	0.00063	-0.67	0.0015
1529	PF00787:PX domain; PF09325:Vps5 C terminal like	-	-	-	-	-	-	-	-	GO:0005515,protein binding; GO:0007154,cell communication; GO:0035091,phosphoinositide binding	-	-	0.063	1	-0.35	0.048	0.36	0.11	-0.42	0.017	0.36	0.017	1.1	1e-13
1530	PF00925:GTP cyclohydrolase II	-	-	-	-	Riboflavin metabolism	-	-	-	GO:0003935,GTP cyclohydrolase II activity; GO:0009231,riboflavin biosynthetic process	3.5.4.25	-	-0.15	1	0.56	0.15	0.19	0.84	0.72	0.059	2.8	4.3e-20	2.4	2.3e-15
1531	-	-	-	-	-	-	-	-	-	-	-	-	0.087	1	0.57	0.037	-0.045	0.96	0.48	0.078	1	6e-06	0.39	0.096
1532	-	-	-	-	-	-	-	-	-	-	-	-	-0.0022	1	0.91	0.19	0.53	0.76	0.92	0.18	2.9	9.4e-07	2.5	4.8e-05
1533	PF04253:Transferrin receptor-like dimerisation domain; PF02225:PA domain; PF04389:Peptidase family M28	-	-	-	-	-	-	-	-	GO:0006508,proteolysis; GO:0008233,peptidase activity; GO:0043275,glutamate carboxypeptidase II activity	3.4.17.21	-	-0.16	1	0.3	0.29	0.15	0.81	0.46	0.084	0.86	8.5e-05	0.71	0.0014
1534	PF07690:Major Facilitator Superfamily	-	-	-	-	-	2.A.1.48.4	-	-	GO:0005215,transporter activity; GO:0006810,transport; GO:0016021,integral to membrane	-	-	0.84	0.3	1.7	5e-06	0.2	0.87	0.91	0.033	2	1.1e-08	0.42	0.29
1535	PF03935:Beta-glucan synthesis-associated protein (SKN1)	-	-	GH16	-	-	-	-	-	-	-	-	-0.35	1	-0.14	0.82	0.65	0.36	0.21	0.72	-1.4	0.00034	-0.6	0.15
1536	PF07690:Major Facilitator Superfamily	-	-	-	-	-	2.A.1.48.4	-	-	GO:0005215,transporter activity; GO:0006810,transport; GO:0016021,integral to membrane	-	-	0.16	1	0.54	0.36	0.19	-	0.38	0.55	0.36	0.46	0.0072	0.99
1537	PF04695:Peroxisomal membrane anchor protein (Pex14p) conserved region	-	-	-	-	-	-	-	-	GO:0005777,peroxisome; GO:0016020,membrane	-	-	-0.22	0.81	0.00031	1	-0.18	0.55	0.22	0.18	0.68	7.3e-07	0.49	0.00034
1538	PF00106:short chain dehydrogenase	-	-	-	S	-	-	-	-	GO:0008152,metabolic process; GO:0016491,oxidoreductase activity; GO:0003824,catalytic activity; GO:0005488,binding; GO:0043738,F420H2 dehydrogenase activity; GO:0043826,sulfur oxygenase reductase activity; GO:0043883,malolactic enzyme activity; GO:0051341,regulation of oxidoreductase activity	1.-.-.-	-	-0.26	0.99	0.18	0.61	-0.022	0.98	0.44	0.16	0.5	0.055	0.3	0.28
1539	PF13840:ACT domain	-	-	-	S	-	-	-	-	GO:0016813,hydrolase activity, acting on carbon-nitrogen (but not peptide) bonds, in linear amidines; GO:0046872,metal ion binding	-	-	-0.45	0.98	-0.46	0.39	-0.013	0.99	-0.0043	1	0.72	0.08	1.2	0.0038
1540	-	-	-	-	S	-	-	-	-	-	-	-	-0.44	0.93	0.045	0.93	0.87	0.053	0.48	0.24	-3	3.8e-22	-2.1	7e-12
1541	-	-	-	-	-	-	-	-	-	-	-	-	0.14	1	-0.53	0.19	-0.078	0.95	-0.67	0.086	-1.1	0.00053	-0.64	0.049
1542	PF00106:short chain dehydrogenase	-	-	-	-	Benzoate degradation via CoA ligation; Ethylbenzene degradation	-	-	-	GO:0008152,metabolic process; GO:0016491,oxidoreductase activity; GO:0003824,catalytic activity; GO:0005488,binding; GO:0004344,glucose dehydrogenase activity; GO:0018446,pinocarveol dehydrogenase activity; GO:0018447,chloral hydrate dehydrogenase activity; GO:0018448,hydroxymethylmethylsilanediol oxidase activity; GO:0018449,1-phenylethanol dehydrogenase activity; GO:0018450,myrtenol dehydrogena…	1.1.-.-	-	-0.062	1	-0.59	0.081	-0.17	0.85	-0.53	0.12	-1.1	3.9e-05	-0.7	0.013
1543	-	-	-	-	-	Starch and sucrose metabolism	-	-	-	GO:0005509,calcium ion binding; GO:0004339,glucan 1,4-alpha-glucosidase activity	3.2.1.3	-	0.063	1	-0.0011	1	0.6	0.072	-0.064	0.87	-0.56	0.012	0.039	0.89
1544	-	-	-	-	-	-	-	-	-	-	-	-	-1.2	0.77	-0.85	0.35	-0.39	0.86	0.35	0.73	-2.5	0.00019	-2.1	0.0027
1545	PF01112:Asparaginase; PF01112:Asparaginase	-	-	-	-	Nitrogen metabolism; Cyanoamino acid metabolism; Alanine and aspartate metabolism	-	MER254746	-	GO:0004067,asparaginase activity; GO:0006516,glycoprotein catabolic process	3.5.1.1	-	0.27	0.95	0.043	0.9	-0.47	0.16	-0.22	0.43	0.37	0.091	-0.14	0.55
1546	PF00331:Glycosyl hydrolase family 10	-	-	GH10	S	-	-	-	-	GO:0004553,hydrolase activity, hydrolyzing O-glycosyl compounds; GO:0005975,carbohydrate metabolic process	-	-	-0.43	1	0.58	0.37	0.33	0.78	1	0.093	-1.5	0.0012	-1.7	0.00043
1547	PF13417:Glutathione S-transferase, N-terminal domain	-	-	-	S	-	-	-	-	-	-	-	0.61	0.85	-1.3	0.0038	-0.54	0.47	-1.9	5.5e-06	-2.4	5e-11	-1.7	7.1e-06
1548	PF00331:Glycosyl hydrolase family 10	-	-	GH10	S	-	-	-	-	GO:0004553,hydrolase activity, hydrolyzing O-glycosyl compounds; GO:0005975,carbohydrate metabolic process	-	-	0.44	1	-0.48	0.6	-2	0.022	-0.92	0.27	-0.57	0.42	-2.1	0.0011
1549	PF00331:Glycosyl hydrolase family 10; PF00331:Glycosyl hydrolase family 10	-	-	GH10	S	-	-	-	-	GO:0004553,hydrolase activity, hydrolyzing O-glycosyl compounds; GO:0005975,carbohydrate metabolic process	-	-	-0.19	1	-0.92	0.15	-0.93	0.3	-0.73	0.27	-1.8	0.00053	-1.8	0.00052
1550	PF12697:Alpha/beta hydrolase family	-	-	-	-	-	-	-	-	-	-	-	-0.72	0.61	-1.3	0.0017	-0.22	0.84	-0.58	0.19	-0.37	0.34	0.71	0.053
1551	PF04912:Dynamitin	-	-	-	-	-	-	-	-	GO:0005869,dynactin complex; GO:0007017,microtubule-based process	-	-	0.29	0.88	0.49	0.043	0.024	0.98	0.2	0.47	0.74	0.00018	0.28	0.2
1552	-	-	-	-	-	-	-	-	-	GO:0003725,double-stranded RNA binding; GO:0005622,intracellular	-	-	-0.88	0.95	1	0.25	-0.32	0.9	1.9	0.024	1.7	0.022	0.31	0.71
1553	PF03142:Chitin synthase	-	-	GT2	-	Aminosugars metabolism	-	-	-	GO:0020037,heme binding; GO:0046914,transition metal ion binding; GO:0016758,transferase activity, transferring hexosyl groups; GO:0004100,chitin synthase activity	2.4.1.16	-	-1.2	0.62	-0.43	0.62	-0.068	0.98	0.77	0.33	-0.53	0.42	-0.17	0.82
1554	PF00782:Dual specificity phosphatase, catalytic domain	-	-	-	-	-	-	-	-	GO:0016311,dephosphorylation; GO:0016791,phosphoric monoester hydrolase activity	-	-	-0.032	1	-0.14	0.5	0.3	0.23	-0.11	0.62	-0.56	0.0002	-0.11	0.51
1555	-	-	-	-	-	-	-	-	-	-	-	-	0.054	1	0.68	0.14	0.024	0.98	0.63	0.18	-0.67	0.048	-1.3	0.0003
1556	PF13432:Tetratricopeptide repeat; PF13432:Tetratricopeptide repeat; PF13432:Tetratricopeptide repeat	-	-	-	-	O-Glycans biosynthesis; Fructose and mannose metabolism; Peptidoglycan biosynthesis; Sphingoglycolipid metabolism; Blood group glycolipid biosynthesis - lact series; Blood group glycolipid biosynthesis - neolact series; Glycerolipid metabolism; Globoside metabolism; Chondroitin / heparan sulfate biosynthesis; Keratan sulfate biosynthesis; N-Glycans biosynthesis	-	-	-	GO:0000009,alpha-1,6-mannosyltransferase activity; GO:0000026,alpha-1,2-mannosyltransferase activity; GO:0000030,mannosyltransferase activity; GO:0000033,alpha-1,3-mannosyltransferase activity; GO:0001962,alpha-1,3-galactosyltransferase activity; GO:0003980,UDP-glucose:glycoprotein glucosyltransferase activity; GO:0004376,glycolipid mannosyltransferase activity; GO:0004576,oligosaccharyl transfer…	2.4.1.-	-	0.03	1	0.092	0.82	0.3	0.62	0.062	0.89	1.6	1.3e-09	1.8	7.3e-12
1557	-	-	-	-	-	-	-	-	-	-	-	-	-0.029	1	0.026	0.93	-0.096	0.87	0.054	0.85	1.2	1.2e-11	1	1.3e-09
1558	PF07766:LETM1-like protein	-	-	-	S	-	-	-	-	-	-	-	0.0038	1	0.21	0.44	-0.53	0.074	0.21	0.45	0.0055	0.99	-0.73	0.00027
1559	PF00078:Reverse transcriptase (RNA-dependent DNA polymerase)	-	-	-	-	-	-	-	-	GO:0003723,RNA binding; GO:0003964,RNA-directed DNA polymerase activity; GO:0006278,RNA-dependent DNA replication	-	-	-	-	-	-	-	-	-	-	-	-	-	-
1560	-	-	-	-	S	-	-	-	-	-	-	-	-	-	-	-	-	-	-	-	-	-	-	-
1561	-	-	-	-	-	-	-	-	-	-	-	-	-	-	-	-	-	-	-	-	-	-	-	-
1562	-	-	-	-	S	-	-	-	-	-	-	-	-	-	-	-	-	-	-	-	-	-	-	-
1563	PF09420:Ribosome biogenesis protein Nop16	-	-	-	S	-	-	-	-	-	-	-	0.35	0.96	0.56	0.11	-0.24	0.76	0.22	0.59	0.99	0.00062	0.18	0.58
1564	PF09796:Ubiquinol-cytochrome-c reductase complex subunit (QCR10)	-	-	-	S	Oxidative phosphorylation	-	-	-	GO:0008121,ubiquinol-cytochrome-c reductase activity	1.10.2.2	-	-0.019	1	0.48	0.17	-0.43	0.41	0.5	0.14	-0.15	0.63	-1.1	0.0001
1565	-	-	-	-	-	-	-	MER077213	-	GO:0003824,catalytic activity; GO:0008152,metabolic process	-	-	-0.34	1	-0.43	0.36	-0.38	0.63	-0.085	0.89	-0.15	0.71	-0.11	0.8
1566	PF17829:Gylcosyl hydrolase family 115 C-terminal domain; PF15979:Glycosyl hydrolase family 115; PF15979:Glycosyl hydrolase family 115	-	-	GH115	S	-	-	-	-	-	-	-	0.41	0.96	0.88	0.031	-0.16	0.89	0.47	0.28	-0.097	0.8	-1.1	0.00072
1567	PF01529:DHHC palmitoyltransferase	-	-	-	S	-	-	-	-	GO:0008270,zinc ion binding	-	-	0.11	1	0.006	0.98	0.39	0.075	-0.11	0.6	0.0018	0.99	0.38	0.011
1568	PF00202:Aminotransferase class-III	-	-	-	S	Arginine and proline metabolism; Urea cycle and metabolism of amino groups	-	-	-	GO:0008483,transaminase activity; GO:0030170,pyridoxal phosphate binding; GO:0004587,ornithine-oxo-acid transaminase activity	2.6.1.13	-	0.077	1	-0.31	0.095	-0.017	0.98	-0.39	0.033	0.67	7.1e-06	0.96	5.9e-11
1569	PF08609:Nucleotide exchange factor Fes1	-	-	-	-	-	-	-	-	GO:0005488,binding	-	-	0.084	1	0.83	0.017	0.84	0.037	0.75	0.032	-0.73	0.012	-0.72	0.015
1570	-	-	-	-	-	-	-	-	-	-	-	-	-0.043	1	-0.21	0.17	0.016	0.97	-0.16	0.29	-0.66	2.3e-08	-0.44	0.0003
1571	-	-	-	-	S	-	-	-	-	-	-	-	0.81	-	1	-	-0.65	-	0.23	0.85	0.98	0.2	-0.71	0.39
1572	-	-	-	-	-	-	-	-	-	-	-	-	0.52	0.9	1.2	0.0046	-0.5	0.49	0.68	0.12	2.3	1.1e-10	0.56	0.14
1573	PF00168:C2 domain; PF10540:Munc13 (mammalian uncoordinated) homology domain; PF10540:Munc13 (mammalian uncoordinated) homology domain	-	-	-	-	-	-	-	-	GO:0008152,metabolic process; GO:0016491,oxidoreductase activity	-	-	0.34	0.54	-0.12	0.6	0.47	0.044	-0.47	0.017	1.1	6.4e-13	1.7	3.7e-28
1574	PF12397:U3 small nucleolar RNA-associated protein 10; PF08146:BP28CT (NUC211) domain	-	-	-	-	-	-	-	-	GO:0005488,binding	-	-	-0.0054	1	0.92	0.028	0.3	0.73	0.92	0.026	1.1	0.001	0.51	0.16
1575	PF00012:Hsp70 protein	-	-	-	S	-	-	-	-	GO:0005524,ATP binding	-	-	0.073	1	-0.11	0.34	0.35	0.0077	-0.19	0.089	1.9	1.4e-97	2.3	1.2e-148
1576	PF00400:WD domain, G-beta repeat; PF00400:WD domain, G-beta repeat; PF00786:P21-Rho-binding domain; PF00069:Protein kinase domain	-	-	-	-	-	-	-	-	GO:0004672,protein kinase activity; GO:0005524,ATP binding; GO:0006468,protein amino acid phosphorylation; GO:0004713,protein-tyrosine kinase activity; GO:0004674,protein serine/threonine kinase activity; GO:0004675,transmembrane receptor protein serine/threonine kinase activity; GO:0004676,3-phosphoinositide-dependent protein kinase activity; GO:0004677,DNA-dependent protein kinase activity; GO:…	2.7.11.-	-	0.092	1	-0.037	0.87	0.19	0.54	-0.13	0.51	0.58	4.3e-05	0.81	1.1e-08
1577	-	-	-	-	S	-	-	-	-	-	-	-	-0.13	1	-1.1	1.7e-07	0.022	0.98	-0.94	5.5e-06	-1.3	5.2e-13	-0.23	0.26
1578	PF00293:NUDIX domain	-	-	-	-	-	-	-	-	GO:0016787,hydrolase activity	-	-	-0.14	1	-0.25	0.28	0.3	0.32	-0.11	0.67	-1	3.2e-09	-0.45	0.011
1579	-	-	-	-	-	-	-	-	-	-	-	-	-0.5	0.94	-0.41	0.43	0.16	0.9	0.086	0.9	-0.82	0.037	-0.25	0.57
1580	-	-	-	-	-	-	-	-	-	-	-	-	0.15	0.99	-0.078	0.72	0.14	0.71	-0.23	0.21	0.26	0.083	0.48	0.0013
1581	PF00400:WD domain, G-beta repeat	-	-	-	S	-	-	-	-	-	-	-	0.11	1	-0.33	0.06	-0.14	0.7	-0.44	0.011	0.75	1.6e-07	0.94	3.2e-11
1582	-	-	-	-	S	-	-	-	-	-	-	-	-0.25	0.97	-0.17	0.56	-0.41	0.25	0.08	0.81	-0.12	0.62	-0.36	0.11
1583	PF17829:Gylcosyl hydrolase family 115 C-terminal domain; PF15979:Glycosyl hydrolase family 115	-	-	GH115	S	-	-	-	-	-	-	-	-0.53	1	-2.1	0.0081	-0.27	0.91	-1.6	0.052	-3	6e-06	-1.2	0.1
1584	PF00248:Aldo/keto reductase family	-	-	-	-	Benzoate degradation via CoA ligation; Ethylbenzene degradation	8.A.5.1.3	-	-	GO:0016491,oxidoreductase activity; GO:0004344,glucose dehydrogenase activity; GO:0018446,pinocarveol dehydrogenase activity; GO:0018447,chloral hydrate dehydrogenase activity; GO:0018448,hydroxymethylmethylsilanediol oxidase activity; GO:0018449,1-phenylethanol dehydrogenase activity; GO:0018450,myrtenol dehydrogenase activity; GO:0042469,versicolorin reductase activity; GO:0045703,ketoreductase…	1.1.-.-	-	-0.17	1	0.57	0.19	-0.00085	1	0.74	0.079	0.91	0.0096	0.34	0.38
1585	PF00270:DEAD/DEAH box helicase; PF04408:Helicase associated domain (HA2); PF07717:Oligonucleotide/oligosaccharide-binding (OB)-fold; PF00271:Helicase conserved C-terminal domain	-	-	-	S	Purine metabolism	-	-	-	GO:0003676,nucleic acid binding; GO:0004386,helicase activity; GO:0005524,ATP binding; GO:0008026,ATP-dependent helicase activity; GO:0000166,nucleotide binding; GO:0017111,nucleoside-triphosphatase activity; GO:0004003,ATP-dependent DNA helicase activity; GO:0004004,ATP-dependent RNA helicase activity; GO:0008094,DNA-dependent ATPase activity; GO:0008186,RNA-dependent ATPase activity; GO:0015462…	3.6.1.3	-	-0.06	1	-0.17	0.46	0.031	0.96	-0.11	0.66	0.33	0.063	0.53	0.0021
1586	PF00501:AMP-binding enzyme; PF00501:AMP-binding enzyme; PF13193:AMP-binding enzyme C-terminal domain; PF08240:Alcohol dehydrogenase GroES-like domain; PF00107:Zinc-binding dehydrogenase	-	-	-	-	Fatty acid metabolism	-	-	-	GO:0003824,catalytic activity; GO:0008152,metabolic process; GO:0008270,zinc ion binding; GO:0016616,oxidoreductase activity, acting on the CH-OH group of donors, NAD or NADP as acceptor; GO:0051287,NAD binding; GO:0005488,binding; GO:0004467,long-chain-fatty-acid-CoA ligase activity; GO:0015645,fatty-acid ligase activity; GO:0031955,short-chain-fatty-acid-CoA ligase activity; GO:0031956,medium-c…	6.2.1.3	-	-0.22	1	-0.49	0.11	0.27	0.63	-0.27	0.41	-2	9.4e-17	-1.2	4.1e-07
1587	-	-	-	-	-	-	-	-	-	-	-	-	0.068	1	0.11	0.63	-0.083	0.87	0.037	0.89	0.023	0.9	-0.17	0.32
1588	-	-	-	-	S	-	-	-	-	GO:0005488,binding	-	-	-0.065	1	-0.81	0.085	-0.48	0.51	-0.74	0.11	-1.4	0.00024	-1	0.0046
1589	-	-	-	-	-	-	-	-	-	-	-	-	-0.31	1	-0.12	0.86	-0.16	0.92	0.19	0.78	-0.2	0.69	-0.23	0.63
1590	PF07572:Bucentaur or craniofacial development	-	-	-	-	-	-	-	-	-	-	-	-0.32	0.94	0.22	0.51	0.06	0.95	0.53	0.065	-0.89	0.00013	-1	8.5e-06
1591	PF09180:Prolyl-tRNA synthetase, C-terminal; PF03129:Anticodon binding domain; PF04073:Aminoacyl-tRNA editing domain; PF00587:tRNA synthetase class II core domain (G, H, P, S and T)	-	-	-	-	Aminoacyl-tRNA biosynthesis; Arginine and proline metabolism	-	-	-	GO:0000166,nucleotide binding; GO:0004812,aminoacyl-tRNA ligase activity; GO:0005524,ATP binding; GO:0005737,cytoplasm; GO:0006412,translation; GO:0006418,tRNA aminoacylation for protein translation; GO:0004827,proline-tRNA ligase activity; GO:0006433,prolyl-tRNA aminoacylation	6.1.1.15	-	-0.17	1	0.24	0.46	0.21	0.74	0.41	0.18	1.2	7.8e-07	1.1	1.7e-06
1592	PF08264:Anticodon-binding domain of tRNA; PF00133:tRNA synthetases class I (I, L, M and V)	-	-	-	-	Valine, leucine and isoleucine biosynthesis; Aminoacyl-tRNA biosynthesis	-	-	-	GO:0000166,nucleotide binding; GO:0004812,aminoacyl-tRNA ligase activity; GO:0005524,ATP binding; GO:0005737,cytoplasm; GO:0006412,translation; GO:0006418,tRNA aminoacylation for protein translation; GO:0004822,isoleucine-tRNA ligase activity	6.1.1.5	-	0.0099	1	0.7	9.1e-05	0.077	0.88	0.69	0.00011	0.33	0.042	-0.3	0.076
1593	PF02984:Cyclin, C-terminal domain; PF00134:Cyclin, N-terminal domain	-	-	-	-	-	-	-	-	GO:0005634,nucleus	-	-	0.086	1	0.88	0.0048	-0.049	0.96	0.79	0.012	0.76	0.004	-0.17	0.58
1594	PF13417:Glutathione S-transferase, N-terminal domain	-	-	-	-	-	-	-	-	-	-	-	-0.093	1	0.29	0.33	0.25	0.56	0.38	0.17	-1	4.1e-07	-1.1	1.1e-06
1595	PF00443:Ubiquitin carboxyl-terminal hydrolase	-	-	-	-	-	-	-	-	GO:0004221,ubiquitin thiolesterase activity; GO:0006511,ubiquitin-dependent protein catabolic process	3.1.2.15	-	-0.059	1	-0.22	0.3	-0.056	0.93	-0.17	0.46	1.1	2.3e-10	1.2	1.2e-13
1596	PF00155:Aminotransferase class I and II	-	-	-	-	Phenylalanine metabolism; Histidine metabolism; Tyrosine metabolism; Phenylalanine, tyrosine and tryptophan biosynthesis	-	-	-	GO:0008152,metabolic process; GO:0016740,transferase activity; GO:0009058,biosynthetic process; GO:0016769,transferase activity, transferring nitrogenous groups; GO:0030170,pyridoxal phosphate binding; GO:0000105,histidine biosynthetic process; GO:0004400,histidinol-phosphate transaminase activity	2.6.1.9	-	-0.5	0.88	0.35	0.43	0.32	0.7	0.85	0.034	1.1	0.00083	1.1	0.0014
1597	PF00400:WD domain, G-beta repeat; PF00400:WD domain, G-beta repeat; PF00400:WD domain, G-beta repeat; PF00400:WD domain, G-beta repeat; PF00400:WD domain, G-beta repeat; PF00400:WD domain, G-beta repeat; PF00400:WD domain, G-beta repeat	-	-	-	-	Glycerolipid metabolism	9.A.14.1.1	MER134837	-	GO:0003847,1-alkyl-2-acetylglycerophosphocholine esterase activity	3.1.1.47	-	-0.2	0.9	-0.08	0.68	-0.11	0.76	0.12	0.54	0.98	8.2e-13	0.94	4.2e-12
1598	PF00232:Glycosyl hydrolase family 1	-	-	GH1	-	Starch and sucrose metabolism; Cyanoamino acid metabolism; Flavonoids, stilbene and lignin biosynthesis	-	-	-	GO:0004553,hydrolase activity, hydrolyzing O-glycosyl compounds; GO:0005975,carbohydrate metabolic process; GO:0008422,beta-glucosidase activity	3.2.1.21	-	-0.36	1	-1.8	0.00022	-0.33	0.77	-1.5	0.0042	-0.99	0.024	0.5	0.29
1599	PF00135:Carboxylesterase family	-	-	-	-	-	-	MER228684	-	-	-	-	0.051	1	-0.4	0.38	-0.96	0.0051	-0.45	0.32	-6.9	5.6e-127	-7.5	4.9e-145
1600	-	-	-	-	S	-	-	-	-	-	-	-	-0.18	0.98	0.14	0.53	-0.19	0.63	0.32	0.1	0.72	1e-05	0.39	0.02
1601	PF01960:ArgJ family	-	-	-	-	-	-	-	-	GO:0004358,glutamate N-acetyltransferase activity; GO:0006526,arginine biosynthetic process	-	-	-0.17	1	0.074	0.89	-0.91	0.055	0.25	0.6	-1.4	1.7e-05	-2.4	1.2e-13
1602	PF01247:Ribosomal protein L35Ae	-	-	-	-	-	-	-	-	GO:0003735,structural constituent of ribosome; GO:0005622,intracellular; GO:0005840,ribosome; GO:0006412,translation	-	-	-0.16	1	1.1	0.056	-0.26	0.86	1.2	0.025	1.6	0.00036	0.3	0.57
1603	PF06046:Exocyst complex component Sec6	-	-	-	-	-	-	-	-	GO:0016813,hydrolase activity, acting on carbon-nitrogen (but not peptide) bonds, in linear amidines; GO:0046872,metal ion binding	-	-	0.26	0.9	-0.046	0.87	0.13	0.79	-0.3	0.17	0.28	0.13	0.46	0.012
1604	PF00795:Carbon-nitrogen hydrolase; PF02540:NAD synthase	-	-	-	-	Nicotinate and nicotinamide metabolism; Glutamate metabolism	-	-	-	GO:0006807,nitrogen compound metabolic process; GO:0016810,hydrolase activity, acting on carbon-nitrogen (but not peptide) bonds; GO:0003952,NAD+ synthase (glutamine-hydrolyzing) activity	6.3.5.1	-	-0.14	1	-0.41	0.042	0.014	0.98	-0.28	0.18	0.53	0.0019	0.95	7.5e-09
1605	PF00076:RNA recognition motif. (a.k.a. RRM, RBD, or RNP domain); PF00076:RNA recognition motif. (a.k.a. RRM, RBD, or RNP domain)	-	-	-	-	-	-	-	-	GO:0003676,nucleic acid binding	-	-	-0.0082	1	-0.68	0.052	-0.55	0.25	-0.67	0.053	-1.8	3e-11	-1.7	5.8e-10
1606	PF01039:Carboxyl transferase domain; PF02786:Carbamoyl-phosphate synthase L chain, ATP binding domain; PF02785:Biotin carboxylase C-terminal domain; PF00364:Biotin-requiring enzyme; PF08326:Acetyl-CoA carboxylase, central region; PF00289:Biotin carboxylase, N-terminal domain	-	-	-	-	-	-	-	-	GO:0016874,ligase activity; GO:0009374,biotin binding; GO:0003824,catalytic activity; GO:0005524,ATP binding; GO:0008152,metabolic process	-	-	-0.094	1	0.31	0.42	0.29	0.66	0.4	0.27	1.2	7.8e-06	1.2	1.1e-05
1607	PF08632:Activator of mitotic machinery Cdc14 phosphatase activation C-term	-	-	-	-	-	-	-	-	-	-	-	0.12	0.98	-0.1	0.48	0.55	8.1e-05	-0.22	0.095	0.43	8.7e-05	1.1	4.5e-23
1608	PF15411:Pleckstrin homology domain	-	-	-	-	-	-	-	-	GO:0005515,protein binding; GO:0008270,zinc ion binding	-	-	0.12	1	-0.3	0.2	-0.12	0.82	-0.42	0.064	-0.11	0.6	0.07	0.75
1609	PF00149:Calcineurin-like phosphoesterase	-	-	-	-	-	-	-	-	GO:0016787,hydrolase activity	-	-	-0.44	0.98	-1.4	0.0029	-0.064	0.97	-0.94	0.048	-0.88	0.029	0.43	0.31
1610	-	-	-	-	-	-	-	-	-	-	-	-	-0.18	1	-0.23	0.68	-0.29	-	-0.05	0.94	0.32	0.48	0.26	0.57
1611	-	-	-	-	-	-	-	-	-	-	-	-	0.54	0.81	-0.57	0.15	0.12	0.95	-1.1	0.0029	3.7	2e-24	4.4	1.5e-34
1612	PF03367:ZPR1 zinc-finger domain; PF03367:ZPR1 zinc-finger domain	-	-	-	-	-	-	-	-	GO:0005515,protein binding; GO:0008270,zinc ion binding	-	-	-0.14	1	0.04	0.93	0.15	0.86	0.18	0.65	1.3	1.5e-06	1.4	1.6e-07
1613	PF00403:Heavy-metal-associated domain; PF00403:Heavy-metal-associated domain; PF00122:E1-E2 ATPase; PF00702:haloacid dehalogenase-like hydrolase	-	-	-	S	-	3.A.3.5.29; 3.A.3.5.3	-	-	GO:0008152,metabolic process; GO:0016787,hydrolase activity; GO:0005524,ATP binding; GO:0006810,transport; GO:0015662,ATPase activity, coupled to transmembrane movement of ions, phosphorylative mechanism; GO:0016020,membrane; GO:0004008,copper-exporting ATPase activity; GO:0006825,copper ion transport; GO:0003824,catalytic activity; GO:0030001,metal ion transport; GO:0046872,metal ion binding; GO…	3.6.3.4	-	0.19	1	-0.36	0.27	-0.068	0.95	-0.55	0.076	1	7.9e-05	1.3	2.4e-07
1614	PF07426:Dynactin subunit p22	-	-	-	-	-	-	-	-	-	-	-	-0.24	0.98	0.031	0.93	0.49	0.2	0.27	0.33	0.51	0.024	0.96	1.9e-05
1615	-	-	-	-	-	Urea cycle and metabolism of amino groups; Arginine and proline metabolism; Glycine, serine and threonine metabolism	-	-	-	GO:0030731,guanidinoacetate N-methyltransferase activity	2.1.1.2	-	0.098	1	-0.45	0.033	-0.0087	0.99	-0.55	0.0084	-0.75	1.7e-05	-0.3	0.1
1616	-	-	-	-	-	-	-	-	-	-	-	-	-0.27	0.98	-0.42	0.17	0.46	0.34	-0.16	0.66	1.1	9.3e-06	2	1.5e-15
1617	-	-	-	-	-	-	-	-	-	-	-	-	0.37	0.38	-0.35	0.064	0.34	0.15	-0.71	3.8e-05	-0.63	2.2e-05	0.054	0.76
1618	PF03169:OPT oligopeptide transporter protein	-	-	-	S	-	2.A.67.1.5	-	-	-	-	-	0.29	0.98	-0.4	0.23	0.093	0.92	-0.68	0.029	-2.4	7.4e-23	-1.9	7.5e-15
1619	PF10516:SHNi-TPR	-	-	-	-	-	-	-	-	-	-	-	-0.0019	1	0.73	0.0077	-0.059	0.95	0.73	0.0075	1.3	6.6e-09	0.55	0.025
1620	PF00171:Aldehyde dehydrogenase family	-	-	-	-	Porphyrin and chlorophyll metabolism; Urea cycle and metabolism of amino groups	-	-	-	GO:0004350,glutamate-5-semialdehyde dehydrogenase activity; GO:0006561,proline biosynthetic process; GO:0008152,metabolic process; GO:0016491,oxidoreductase activity	1.2.1.41	-	-0.27	0.91	-0.44	0.07	-0.02	0.98	-0.16	0.55	1.3	2.5e-10	1.7	1.3e-17
1621	-	-	-	-	-	-	-	-	-	-	-	-	-0.73	-	-0.61	0.38	-0.1	-	0.12	0.88	-1.3	0.012	-0.75	0.14
1622	-	-	-	-	-	-	-	-	-	-	-	-	0.33	0.85	0.44	0.1	0.12	0.87	0.11	0.76	0.67	0.0023	0.35	0.14
1623	PF07651:ANTH domain	-	-	-	-	Starch and sucrose metabolism	-	-	-	GO:0005543,phospholipid binding; GO:0004339,glucan 1,4-alpha-glucosidase activity	3.2.1.3	-	0.23	1	-0.2	0.57	0.23	0.74	-0.43	0.17	2	4.8e-16	2.5	7.3e-23
1624	PF01532:Glycosyl hydrolase family 47	-	-	GH47	S	N-Glycans biosynthesis	-	-	-	GO:0004571,mannosyl-oligosaccharide 1,2-alpha-mannosidase activity; GO:0005509,calcium ion binding; GO:0016020,membrane	3.2.1.113	-	-0.04	1	-0.2	0.31	0.27	0.37	-0.16	0.42	0.87	2e-08	1.3	2.4e-18
1625	PF02782:FGGY family of carbohydrate kinases, C-terminal domain; PF00370:FGGY family of carbohydrate kinases, N-terminal domain	-	-	-	-	Glycerolipid metabolism	-	-	-	GO:0005975,carbohydrate metabolic process; GO:0004370,glycerol kinase activity; GO:0006072,glycerol-3-phosphate metabolic process	2.7.1.30	-	0.87	0.94	-0.55	0.55	-0.13	0.96	-1.4	0.08	3.5	5.1e-08	4	1e-09
1626	PF00069:Protein kinase domain	-	-	-	-	-	-	-	-	GO:0004672,protein kinase activity; GO:0005524,ATP binding; GO:0006468,protein amino acid phosphorylation; GO:0004674,protein serine/threonine kinase activity; GO:0004675,transmembrane receptor protein serine/threonine kinase activity; GO:0004676,3-phosphoinositide-dependent protein kinase activity; GO:0004677,DNA-dependent protein kinase activity; GO:0004679,AMP-activated protein kinase activity…	2.7.11.-	-	-0.098	1	0.21	0.47	-0.25	0.65	0.31	0.27	1.4	5.9e-10	0.92	4.2e-05
1627	PF00270:DEAD/DEAH box helicase; PF00271:Helicase conserved C-terminal domain	-	-	-	-	Starch and sucrose metabolism; Folate biosynthesis	-	-	-	GO:0003676,nucleic acid binding; GO:0004386,helicase activity; GO:0005524,ATP binding; GO:0008026,ATP-dependent helicase activity; GO:0000810,diacylglycerol pyrophosphate phosphatase activity; GO:0004787,thiamin-pyrophosphatase activity; GO:0008413,8-oxo-7,8-dihydroguanine triphosphatase activity; GO:0008758,UDP-2,3-diacylglucosamine hydrolase activity; GO:0008796,bis(5'-nucleosyl)-tetraphosphata…	3.6.1.-	-	-0.026	1	0.73	0.082	0.32	0.72	0.75	0.069	2	3.6e-09	1.6	4e-06
1628	-	-	-	-	-	-	-	-	-	-	-	-	0.045	1	0.13	0.61	-0.037	0.97	0.09	0.76	1.6	6.7e-15	1.4	3e-12
1629	PF12937:F-box-like	-	-	-	S	-	-	-	-	-	-	-	0.18	1	-0.44	0.67	-0.31	0.9	-0.62	0.53	-0.28	0.74	-0.15	0.87
1630	PF18011:C-terminal domain found in long catalases; PF06628:Catalase-related immune-responsive; PF00199:Catalase	-	-	-	-	Tryptophan metabolism; Methane metabolism	-	-	-	GO:0004096,catalase activity; GO:0006118,electron transport; GO:0006979,response to oxidative stress; GO:0005506,iron ion binding; GO:0020037,heme binding	1.11.1.6	-	-0.15	1	-0.42	0.25	0.41	0.55	-0.27	0.48	0.43	0.17	1.3	3.3e-05
1631	-	-	-	-	S	-	-	-	-	-	-	-	0.18	1	0.73	0.09	-0.23	0.82	0.55	0.22	0.18	0.64	-0.78	0.031
1632	-	-	-	-	-	-	-	-	-	-	-	-	-0.82	0.78	0.33	0.61	-0.48	0.49	1.1	0.062	-4.3	1.4e-23	-5.1	6.4e-24
1633	-	-	-	-	S	-	-	-	-	GO:0006508,proteolysis; GO:0008236,serine-type peptidase activity; GO:0008152,metabolic process; GO:0016491,oxidoreductase activity	-	-	-0.64	0.96	0.81	0.24	-0.17	0.93	1.4	0.027	-3.5	1.1e-11	-4.5	2.2e-17
1634	PF00248:Aldo/keto reductase family; PF00248:Aldo/keto reductase family	-	-	-	-	Benzoate degradation via CoA ligation; Ethylbenzene degradation	8.A.5.1.3	-	-	GO:0016491,oxidoreductase activity; GO:0004344,glucose dehydrogenase activity; GO:0018446,pinocarveol dehydrogenase activity; GO:0018447,chloral hydrate dehydrogenase activity; GO:0018448,hydroxymethylmethylsilanediol oxidase activity; GO:0018449,1-phenylethanol dehydrogenase activity; GO:0018450,myrtenol dehydrogenase activity; GO:0042469,versicolorin reductase activity; GO:0045703,ketoreductase…	1.1.-.-	-	-0.18	1	-0.97	0.16	-0.48	0.72	-0.79	0.26	-4.7	2.5e-19	-4.2	7.1e-16
1635	PF07993:Male sterility protein; PF00501:AMP-binding enzyme	-	-	-	S	Lysine biosynthesis; Lysine degradation	-	-	NRPS-Like	GO:0003824,catalytic activity; GO:0008152,metabolic process; GO:0048037,cofactor binding; GO:0005488,binding; GO:0004043,L-aminoadipate-semialdehyde dehydrogenase activity; GO:0005949,aminoadipate-semialdehyde dehydrogenase complex	1.2.1.31	-	0.0006	1	0.27	0.27	0.18	0.73	0.27	0.27	0.95	8.8e-07	0.86	1.4e-05
1636	-	-	-	-	-	-	-	-	NRPS-Like	GO:0005515,protein binding	-	-	0.0022	1	0.68	0.043	0.022	0.98	0.68	0.043	-0.12	0.67	-0.78	0.0061
1637	-	-	-	-	-	-	-	-	NRPS-Like	-	-	-	-0.11	1	0.18	0.61	0.22	0.73	0.29	0.37	0.063	0.83	0.11	0.72
1638	-	-	-	-	S	-	-	-	NRPS-Like	GO:0005215,transporter activity; GO:0006810,transport; GO:0016020,membrane	-	-	-1.6	0.44	-1.5	0.086	-0.27	0.92	0.11	0.93	-3.5	3.6e-07	-2.3	0.0012
1639	PF02777:Iron/manganese superoxide dismutases, C-terminal domain; PF00081:Iron/manganese superoxide dismutases, alpha-hairpin domain	-	-	-	-	-	-	-	NRPS-Like	GO:0004784,superoxide dismutase activity; GO:0006801,superoxide metabolic process; GO:0046872,metal ion binding	1.15.1.1	-	-0.13	1	-0.61	0.042	-0.32	0.53	-0.47	0.11	-0.53	0.032	-0.25	0.35
1640	PF07993:Male sterility protein	-	-	-	-	-	-	-	NRPS-Like	GO:0003824,catalytic activity; GO:0005488,binding; GO:0008152,metabolic process	-	-	0.24	1	-0.3	0.47	0.33	0.72	-0.54	0.17	2.3	4e-12	2.9	1.3e-18
1641	PF06472:ABC transporter transmembrane region 2; PF00005:ABC transporter	-	-	-	S	-	3.A.1.203.3	-	-	GO:0005524,ATP binding; GO:0016887,ATPase activity; GO:0000166,nucleotide binding; GO:0017111,nucleoside-triphosphatase activity; GO:0006810,transport; GO:0016020,membrane	-	-	0.37	0.81	-0.15	0.64	-0.15	0.8	-0.51	0.053	0.47	0.035	0.46	0.04
1642	-	-	-	-	S	-	-	-	-	-	-	-	-0.064	1	-0.91	0.22	0.29	0.88	-0.84	0.26	-2.8	1.3e-06	-1.6	0.0074
1643	PF08568:Uncharacterised protein family, YAP/Alf4/glomulin	-	-	-	-	-	-	-	-	-	-	-	-0.21	1	-0.72	0.12	-0.13	0.93	-0.5	0.29	-0.62	0.11	-0.03	0.95
1644	PF13445:RING-type zinc-finger; PF00176:SNF2 family N-terminal domain; PF00271:Helicase conserved C-terminal domain	-	-	-	-	Purine metabolism	-	-	-	GO:0003677,DNA binding; GO:0005524,ATP binding; GO:0003676,nucleic acid binding; GO:0004386,helicase activity; GO:0005515,protein binding; GO:0008270,zinc ion binding; GO:0004003,ATP-dependent DNA helicase activity; GO:0004004,ATP-dependent RNA helicase activity; GO:0008026,ATP-dependent helicase activity; GO:0008094,DNA-dependent ATPase activity; GO:0008186,RNA-dependent ATPase activity; GO:0015…	3.6.1.3	-	-0.01	1	0.25	0.42	0.33	0.48	0.26	0.4	-0.5	0.036	-0.42	0.085
1645	PF05462:Slime mold cyclic AMP receptor	-	-	-	S	-	-	-	-	GO:0031177,phosphopantetheine binding	-	-	0.21	0.98	-0.2	0.43	-0.017	0.98	-0.41	0.078	-1.8	2.2e-23	-1.6	8.6e-19
1646	-	-	-	-	S	-	-	-	-	-	-	-	0.45	-	0.17	0.86	0.2	-	-0.28	0.78	-1	0.09	-0.98	0.13
1647	PF01070:FMN-dependent dehydrogenase; PF00173:Cytochrome b5-like Heme/Steroid binding domain	-	-	-	S	Pyruvate metabolism	-	-	-	GO:0006118,electron transport; GO:0016491,oxidoreductase activity; GO:0020037,heme binding; GO:0046914,transition metal ion binding; GO:0004460,L-lactate dehydrogenase (cytochrome) activity	1.1.2.3	-	0.16	1	-1.3	0.031	-0.14	0.94	-1.4	0.014	0.73	0.14	1.8	0.0001
1648	PF00503:G-protein alpha subunit; PF00503:G-protein alpha subunit; PF05183:RNA dependent RNA polymerase	-	-	-	-	-	-	-	-	GO:0004871,signal transducer activity; GO:0007186,G-protein coupled receptor protein signaling pathway; GO:0019001,guanyl nucleotide binding; GO:0007165,signal transduction	-	-	0.036	1	-0.14	0.46	0.2	0.46	-0.17	0.33	-0.091	0.55	0.25	0.081
1649	PF00106:short chain dehydrogenase	-	-	-	-	Retinol metabolism	-	-	-	GO:0008152,metabolic process; GO:0016491,oxidoreductase activity; GO:0003824,catalytic activity; GO:0005488,binding; GO:0004745,retinol dehydrogenase activity	1.1.1.105	-	0.35	0.89	0.4	0.19	-0.047	0.96	0.052	0.9	1	2.1e-05	0.6	0.02
1650	PF03637:Mob1/phocein family	-	-	-	-	-	-	-	-	GO:0005515,protein binding	-	-	0.12	1	0.12	0.69	0.12	0.86	-0.0027	1	1.2	1.3e-08	1.2	1.4e-08
1651	PF14510:ABC-transporter N-terminal; PF00005:ABC transporter; PF01061:ABC-2 type transporter; PF01061:ABC-2 type transporter; PF06422:CDR ABC transporter; PF06422:CDR ABC transporter; PF00005:ABC transporter	-	-	-	-	-	3.A.1.205.11	-	-	GO:0005524,ATP binding; GO:0016887,ATPase activity; GO:0000166,nucleotide binding; GO:0017111,nucleoside-triphosphatase activity; GO:0006810,transport; GO:0016021,integral to membrane; GO:0042626,ATPase activity, coupled to transmembrane movement of substances	-	-	2.7	0.0001	0.31	0.7	-0.41	0.77	-2.4	9.7e-05	3.8	9.8e-13	3	1e-08
1652	-	-	-	-	S	-	-	-	-	-	-	-	-0.79	0.75	-1.5	0.0026	-0.31	0.79	-0.75	0.16	-6.2	1.9e-50	-5	2.5e-33
1653	-	-	-	-	-	-	-	-	-	-	-	-	-1.5	-	-0.57	0.64	-1.5	-	0.95	0.4	-1.2	0.17	-2.2	0.012
1654	-	-	-	-	-	-	-	-	-	-	-	-	-0.38	0.94	-0.34	0.38	0.039	0.97	0.04	0.94	-0.98	0.00063	-0.6	0.042
1655	-	-	-	-	-	-	-	-	-	-	-	-	0.072	1	0.042	0.91	-0.75	0.0067	-0.03	0.95	-1.2	1.1e-07	-2	7.7e-19
1656	-	-	-	-	S	-	-	-	-	-	-	-	-1.8	-	-2	-	-0.038	-	-0.26	0.87	-1.7	0.11	0.32	0.78
1657	-	-	-	-	-	-	-	-	-	-	-	-	0.0038	1	-0.24	0.67	0.073	-	-0.24	0.67	0.6	0.17	0.91	0.033
1658	PF01841:Transglutaminase-like superfamily	-	-	-	-	-	-	-	-	-	-	-	-0.14	1	-0.26	0.38	0.098	0.91	-0.12	0.72	1.2	2.7e-07	1.5	1.3e-11
1659	-	-	-	-	-	-	-	-	-	-	-	-	0.12	1	-1.2	0.041	-0.75	0.45	-1.3	0.022	1.6	0.0016	2.1	2.6e-05
1660	-	-	-	-	-	-	-	-	-	-	-	-	-0.9	0.98	-1.4	0.17	-0.14	0.96	-0.52	0.67	2.6	0.0013	3.9	1.5e-06
1661	-	-	-	-	S	-	-	-	-	-	-	-	-0.32	1	-0.75	0.3	-0.4	0.8	-0.43	0.59	-0.26	0.68	0.089	0.9
1662	-	-	-	-	S	-	-	-	-	-	-	-	-1.5	0.083	-0.13	0.91	-0.46	0.56	1.4	0.02	-4.3	2.3e-22	-4.6	2.6e-23
1663	PF17667:Fungal protein kinase	-	-	-	-	-	-	-	-	-	-	-	-0.00097	1	0.3	0.4	0.12	0.91	0.3	0.4	1	0.00032	0.84	0.0044
1664	PF00307:Calponin homology (CH) domain; PF00307:Calponin homology (CH) domain; PF00307:Calponin homology (CH) domain; PF00307:Calponin homology (CH) domain	-	-	-	S	-	-	-	-	GO:0003779,actin binding	-	-	0.029	1	-0.17	0.23	0.11	0.67	-0.2	0.15	0.9	4.5e-17	1.2	1.8e-28
1665	PF01425:Amidase	-	-	-	-	-	-	-	-	GO:0016884,carbon-nitrogen ligase activity, with glutamine as amido-N-donor; GO:0004518,nuclease activity; GO:0042578,phosphoric ester hydrolase activity; GO:0043765,T/G mismatch-specific endonuclease activity	3.1.-.-	-	-0.9	0.29	-1.9	4.4e-07	0.079	0.95	-1	0.012	-5.8	4.3e-71	-3.8	4.2e-34
1666	PF01425:Amidase	-	-	-	-	-	-	-	-	GO:0016884,carbon-nitrogen ligase activity, with glutamine as amido-N-donor; GO:0004518,nuclease activity; GO:0042578,phosphoric ester hydrolase activity; GO:0043765,T/G mismatch-specific endonuclease activity	3.1.-.-	-	-0.18	1	0.4	0.1	0.28	0.3	0.57	0.015	-4.8	2.3e-194	-4.9	3.5e-173
1667	-	-	-	-	-	-	-	-	-	-	-	-	-0.17	1	-0.12	0.7	0.35	0.33	0.049	0.89	-2.4	1.5e-33	-1.9	2.4e-21
1668	-	-	-	-	-	-	-	-	-	-	-	-	0.29	1	-0.33	0.48	-0.41	0.45	-0.61	0.16	-1.8	1.1e-09	-1.9	2e-10
1669	-	-	-	-	S	-	-	-	-	-	-	-	0.1	-	0.6	-	-0.66	-	0.5	0.78	0.15	0.92	-1.1	0.38
1670	PF00069:Protein kinase domain; PF00069:Protein kinase domain	-	-	-	-	-	-	-	-	GO:0004672,protein kinase activity; GO:0005524,ATP binding; GO:0006468,protein amino acid phosphorylation; GO:0004713,protein-tyrosine kinase activity; GO:0004674,protein serine/threonine kinase activity; GO:0004675,transmembrane receptor protein serine/threonine kinase activity; GO:0004676,3-phosphoinositide-dependent protein kinase activity; GO:0004677,DNA-dependent protein kinase activity; GO:…	2.7.11.-	-	0.15	1	-0.12	0.72	-0.19	0.74	-0.27	0.36	0.48	0.037	0.4	0.084
1671	-	-	-	-	S	-	-	-	-	-	-	-	-0.25	1	-1	0.047	-0.14	0.93	-0.79	0.13	-1.2	0.0047	-0.32	0.51
1672	-	-	-	-	-	-	-	-	-	-	-	-	0.019	1	-0.51	0.016	0.038	0.96	-0.53	0.012	-0.83	1.5e-06	-0.28	0.13
1673	PF00069:Protein kinase domain	-	-	-	-	-	-	-	-	GO:0004672,protein kinase activity; GO:0005524,ATP binding; GO:0006468,protein amino acid phosphorylation; GO:0004713,protein-tyrosine kinase activity; GO:0004674,protein serine/threonine kinase activity; GO:0004675,transmembrane receptor protein serine/threonine kinase activity; GO:0004676,3-phosphoinositide-dependent protein kinase activity; GO:0004677,DNA-dependent protein kinase activity; GO:…	2.7.11.-	-	-1.3	0.94	-0.49	0.74	-0.2	-	0.83	0.56	3.6	0.00078	3.9	0.00039
1674	PF00069:Protein kinase domain	-	-	-	-	-	-	-	-	GO:0004672,protein kinase activity; GO:0005524,ATP binding; GO:0006468,protein amino acid phosphorylation; GO:0004713,protein-tyrosine kinase activity; GO:0004674,protein serine/threonine kinase activity; GO:0004675,transmembrane receptor protein serine/threonine kinase activity; GO:0004676,3-phosphoinositide-dependent protein kinase activity; GO:0004677,DNA-dependent protein kinase activity; GO:…	2.7.11.-	-	-0.38	0.94	-0.29	0.46	0.71	0.12	0.087	0.86	-0.48	0.11	0.53	0.09
1675	PF00856:SET domain	-	-	-	S	-	-	-	-	GO:0005634,nucleus	-	-	-0.078	1	-0.21	0.5	0.62	0.061	-0.13	0.71	-0.39	0.091	0.44	0.07
1676	-	-	-	-	S	-	-	-	-	-	-	-	-0.067	1	-0.037	0.88	-0.18	0.56	0.031	0.9	-0.17	0.27	-0.32	0.036
1677	PF00487:Fatty acid desaturase; PF11960:Domain of unknown function (DUF3474)	-	-	-	-	-	-	-	-	GO:0016491,oxidoreductase activity; GO:0006629,lipid metabolic process; GO:0016020,membrane; GO:0016717,oxidoreductase activity, acting on paired donors, with oxidation of a pair of donors resulting in the reduction of molecular oxygen to two molecules of water; GO:0050184,phosphatidylcholine desaturase activity	1.3.1.35	-	-1.3	0.35	-1.2	0.064	-0.11	0.96	0.087	0.92	-0.27	0.64	0.79	0.15
1678	-	-	-	GH51	-	-	-	-	-	-	-	-	1.2	0.55	-0.95	0.17	-0.041	0.99	-2.1	0.00096	-2.4	1.1e-05	-1.5	0.0077
1679	PF06964:Alpha-L-arabinofuranosidase C-terminal domain	-	-	GH51	-	-	-	-	-	GO:0046373,L-arabinose metabolic process; GO:0046556,alpha-N-arabinofuranosidase activity	-	-	0.85	0.78	-0.95	0.11	-0.64	0.52	-1.8	0.0014	-3.6	1.1e-14	-3.3	1.8e-12
1680	PF00083:Sugar (and other) transporter	-	-	-	-	Pentose and glucuronate interconversions	2.A.1.1.7	-	-	GO:0005351,sugar:hydrogen symporter activity; GO:0008643,carbohydrate transport; GO:0016020,membrane; GO:0005215,transporter activity; GO:0006810,transport; GO:0016021,integral to membrane; GO:0008733,L-arabinose isomerase activity	5.3.1.4	-	-0.72	1	-1.9	0.04	-0.39	0.88	-1.2	0.22	-2.4	0.0023	-0.82	0.34
1681	PF12706:Beta-lactamase superfamily domain	-	-	-	S	-	-	-	-	GO:0016787,hydrolase activity; GO:0042781,3'-tRNA processing endoribonuclease activity	3.1.26.11	-	-0.18	0.99	0.052	0.85	0.47	0.091	0.23	0.29	1.2	4.2e-12	1.6	2e-20
1682	-	-	-	-	S	-	-	-	-	-	-	-	-0.22	1	-0.61	0.16	-0.32	0.7	-0.39	0.39	0.64	0.074	0.93	0.0083
1683	PF00561:alpha/beta hydrolase fold; PF08386:TAP-like protein	-	-	-	S	-	-	MER064109	-	-	-	-	-0.64	0.91	-0.19	0.79	0.019	0.99	0.45	0.48	0.12	0.83	0.33	0.54
1684	-	-	-	-	-	-	-	-	-	-	-	-	-0.22	1	0.63	0.36	0.18	-	0.85	0.19	-2.3	3.1e-08	-2.7	6.2e-08
1685	PF00067:Cytochrome P450	-	CYP60	-	S	Fatty acid metabolism	-	-	-	GO:0004497,monooxygenase activity; GO:0005506,iron ion binding; GO:0006118,electron transport; GO:0020037,heme binding; GO:0018685,alkane 1-monooxygenase activity	1.14.15.3	-	-0.73	0.71	-1.2	0.014	-0.48	0.57	-0.43	0.42	-0.8	0.046	-0.12	0.8
1686	-	-	-	-	-	-	-	-	-	-	-	-	0.44	0.53	0.93	0.00025	-0.43	0.31	0.48	0.079	1.2	5.8e-08	-0.13	0.61
1687	PF04641:Rtf2 RING-finger; PF15906:Zinc-finger of nitric oxide synthase-interacting protein	-	-	-	-	-	-	-	-	GO:0005515,protein binding; GO:0008270,zinc ion binding	-	-	-0.0085	1	0.085	0.72	0.011	0.99	0.094	0.7	0.65	8.8e-05	0.58	0.00063
1688	PF08240:Alcohol dehydrogenase GroES-like domain; PF00107:Zinc-binding dehydrogenase; PF01425:Amidase	-	-	-	-	Glutamate metabolism; Alanine and aspartate metabolism	-	-	-	GO:0016884,carbon-nitrogen ligase activity, with glutamine as amido-N-donor; GO:0008270,zinc ion binding; GO:0016491,oxidoreductase activity; GO:0003824,catalytic activity; GO:0005488,binding; GO:0008152,metabolic process; GO:0043775,cobyrinate a,c-diamide synthase activity; GO:0050567,glutaminyl-tRNA synthase (glutamine-hydrolyzing) activity	6.3.5.-	-	0.14	1	-0.34	0.33	-0.78	0.016	-0.48	0.15	-3.9	5.5e-58	-4.3	5.4e-71
1689	-	-	-	-	-	-	-	-	-	-	-	-	-0.11	-	-0.28	0.8	0.038	-	-0.17	0.89	-2.6	9.1e-06	-2.3	0.00019
1690	-	-	-	-	S	-	1.C.97.1.1	-	-	-	-	-	0.023	1	-0.21	0.65	-0.14	0.9	-0.24	0.62	-0.82	0.013	-0.74	0.027
1691	-	-	-	-	-	-	-	-	-	-	-	-	0.13	1	-0.31	0.17	0.03	0.97	-0.44	0.047	0.74	0.00015	1.1	1.8e-08
1692	-	-	-	-	-	-	-	-	-	-	-	-	0.11	1	-0.37	0.12	-0.03	0.97	-0.48	0.037	-0.62	0.0011	-0.28	0.17
1693	PF03625:Domain of unknown function DUF302	-	-	-	-	-	-	-	-	-	-	-	0.28	1	2	0.00061	-0.31	0.83	1.7	0.0042	0.73	0.16	-1.5	0.0021
1694	-	-	-	-	-	-	-	-	-	-	-	-	-0.21	1	-0.33	0.34	-0.32	0.56	-0.12	0.78	-0.66	0.013	-0.65	0.014
1695	PF02879:Phosphoglucomutase/phosphomannomutase, alpha/beta/alpha domain II; PF02880:Phosphoglucomutase/phosphomannomutase, alpha/beta/alpha domain III; PF02878:Phosphoglucomutase/phosphomannomutase, alpha/beta/alpha domain I	-	-	-	-	Streptomycin biosynthesis; Erythromycin biosynthesis; Pentose phosphate pathway; Aminosugars metabolism; Starch and sucrose metabolism; Glycolysis / Gluconeogenesis; Galactose metabolism	-	-	-	GO:0005975,carbohydrate metabolic process; GO:0016868,intramolecular transferase activity, phosphotransferases; GO:0004614,phosphoglucomutase activity	5.4.2.2	-	-0.16	1	-0.76	0.021	-0.14	0.87	-0.6	0.072	-1.3	1.3e-06	-0.68	0.014
1696	PF14226:non-haem dioxygenase in morphine synthesis N-terminal; PF03171:2OG-Fe(II) oxygenase superfamily	-	-	-	-	-	-	-	-	GO:0005506,iron ion binding; GO:0016491,oxidoreductase activity; GO:0045543,gibberellin 2-beta-dioxygenase activity	1.14.11.13	-	0.18	1	0.35	0.47	0.58	0.35	0.17	0.75	-7.4	2.1e-113	-7.2	8.7e-103
1697	PF11942:Spt5 transcription elongation factor, acidic N-terminal; PF12815:Spt5 C-terminal nonapeptide repeat binding Spt4; PF03439:Early transcription elongation factor of RNA pol II, NGN section; PF00467:KOW motif	-	-	-	-	-	-	-	-	GO:0003711,transcription elongation regulator activity; GO:0006355,regulation of transcription, DNA-dependent; GO:0006357,regulation of transcription from RNA polymerase II promoter	-	-	0.083	1	-0.17	0.5	0.025	0.97	-0.26	0.29	0.81	1.5e-05	1	5.7e-08
1698	PF07690:Major Facilitator Superfamily	-	-	-	S	-	2.A.1.3.35	-	-	GO:0015520,tetracycline:hydrogen antiporter activity; GO:0015904,tetracycline transport; GO:0016021,integral to membrane; GO:0046677,response to antibiotic; GO:0005215,transporter activity; GO:0006810,transport	-	-	0.13	1	1.1	0.017	-0.042	0.98	1	0.035	-3.4	1.4e-22	-4.6	3.7e-34
1699	-	-	-	-	-	-	-	-	-	-	-	-	1.5	-	0.56	-	-0.47	-	-0.96	0.4	0.65	0.45	-0.39	0.67
1700	-	-	-	-	S	-	-	-	-	-	-	-	0.079	1	-0.27	0.57	0.23	0.77	-0.35	0.45	-1.4	3.6e-06	-0.91	0.0046
1701	PF01423:LSM domain	-	-	-	S	-	-	-	-	GO:0016071,mRNA metabolic process; GO:0030529,ribonucleoprotein complex; GO:0004601,peroxidase activity; GO:0006118,electron transport; GO:0006979,response to oxidative stress; GO:0020037,heme binding	-	-	-0.22	0.85	0.15	0.44	-0.25	0.3	0.37	0.031	-0.015	0.93	-0.42	0.0035
1702	-	-	-	-	-	-	-	-	-	-	-	-	0.17	0.94	0.21	0.22	0.31	0.15	0.035	0.87	0.72	4.3e-08	0.83	6e-10
1703	PF00397:WW domain; PF00784:MyTH4 domain; PF09286:Pro-kumamolisin, activation domain; PF00620:RhoGAP domain	-	-	-	S	-	-	-	-	GO:0005622,intracellular; GO:0007165,signal transduction; GO:0004289,subtilase activity; GO:0006508,proteolysis; GO:0005856,cytoskeleton; GO:0005515,protein binding; GO:0008236,serine-type peptidase activity	-	-	-0.011	1	-0.086	0.67	0.12	0.73	-0.075	0.72	-0.06	0.71	0.15	0.33
1704	PF00171:Aldehyde dehydrogenase family	-	-	-	-	Toluene and xylene degradation; Benzoate degradation via hydroxylation	-	-	-	GO:0008152,metabolic process; GO:0016491,oxidoreductase activity; GO:0018479,benzaldehyde dehydrogenase (NAD+) activity; GO:0019115,benzaldehyde dehydrogenase activity	1.2.1.28	-	1	-	1.8	-	0.99	-	0.77	0.45	-2.7	0.00048	-3.5	0.001
1705	PF02679:(2R)-phospho-3-sulfolactate synthase (ComA)	-	-	-	S	-	-	-	-	GO:0019295,coenzyme M biosynthetic process	-	-	-0.086	1	0.6	0.33	0.0071	1	0.68	0.25	-1.1	0.024	-1.6	0.00042
1706	PF00082:Subtilase family; PF09286:Pro-kumamolisin, activation domain	-	-	-	S	-	-	MER167832	-	GO:0004289,subtilase activity; GO:0006508,proteolysis; GO:0008236,serine-type peptidase activity; GO:0019131,tripeptidyl-peptidase I activity	3.4.14.9	-	-0.18	1	-0.21	0.58	0.024	0.99	-0.035	0.94	1.1	0.00026	1.3	6.4e-06
1707	PF09924:Uncharacterised conserved protein (DUF2156); PF00152:tRNA synthetases class II (D, K and N)	-	-	-	-	Alanine and aspartate metabolism; Aminoacyl-tRNA biosynthesis	-	-	-	GO:0000166,nucleotide binding; GO:0004815,aspartate-tRNA ligase activity; GO:0005524,ATP binding; GO:0005737,cytoplasm; GO:0006412,translation; GO:0006422,aspartyl-tRNA aminoacylation; GO:0004812,aminoacyl-tRNA ligase activity; GO:0006418,tRNA aminoacylation for protein translation	6.1.1.12	-	-0.17	1	0.29	0.68	0.36	0.78	0.46	0.48	-1.3	0.007	-1.2	0.012
1708	PF09286:Pro-kumamolisin, activation domain	-	-	-	-	-	-	-	-	GO:0004289,subtilase activity; GO:0006508,proteolysis; GO:0008236,serine-type peptidase activity	-	-	0.026	1	0.086	0.59	0.17	0.42	0.059	0.74	-0.67	9.8e-10	-0.58	2.4e-07
1709	PF09130:Domain of unknown function (DUF1932); PF03446:NAD binding domain of 6-phosphogluconate dehydrogenase	-	-	-	S	-	-	-	-	GO:0004616,phosphogluconate dehydrogenase (decarboxylating) activity; GO:0006098,pentose-phosphate shunt; GO:0016491,oxidoreductase activity; GO:0003824,catalytic activity; GO:0005488,binding; GO:0008152,metabolic process	-	-	-0.22	1	-0.48	0.079	-0.3	0.51	-0.26	0.37	-0.46	0.042	-0.28	0.24
1710	PF00503:G-protein alpha subunit	-	-	-	-	-	-	-	-	GO:0004871,signal transducer activity; GO:0007186,G-protein coupled receptor protein signaling pathway; GO:0019001,guanyl nucleotide binding; GO:0007165,signal transduction	-	-	-0.017	1	-0.72	0.12	-0.76	0.23	-0.71	0.13	-0.28	0.51	-0.32	0.45
1711	PF01226:Formate/nitrite transporter; PF01226:Formate/nitrite transporter	-	-	-	S	-	2.A.44.2.1	-	-	GO:0005215,transporter activity; GO:0006810,transport; GO:0016020,membrane	-	-	-0.46	1	-1.2	0.16	-0.46	0.81	-0.71	0.43	1.8	0.0063	2.5	0.00013
1712	PF00782:Dual specificity phosphatase, catalytic domain	-	-	-	-	-	-	-	-	GO:0006470,protein amino acid dephosphorylation; GO:0008138,protein tyrosine/serine/threonine phosphatase activity; GO:0016311,dephosphorylation; GO:0016791,phosphoric monoester hydrolase activity; GO:0004725,protein tyrosine phosphatase activity	-	-	0.11	1	0.096	0.84	-0.0097	0.99	-0.01	0.99	0.85	0.01	0.74	0.028
1713	PF00701:Dihydrodipicolinate synthetase family	-	-	-	-	-	-	-	-	GO:0008152,metabolic process; GO:0016829,lyase activity	-	-	-0.52	1	-1.3	0.11	-0.41	0.84	-0.78	0.37	-1.6	0.018	-0.7	0.33
1714	-	-	-	-	S	-	-	-	-	-	-	-	-0.049	1	0.44	0.35	-0.58	0.27	0.48	0.29	-0.99	0.0024	-2	3e-09
1715	-	-	-	-	S	-	-	-	-	-	-	-	0.076	-	0.37	0.58	0.37	-	0.29	0.68	0.24	0.65	0.25	0.67
1716	-	-	-	-	S	-	-	-	-	-	-	-	-0.35	0.81	-0.53	0.033	-0.13	0.83	-0.18	0.52	-0.096	0.68	0.31	0.16
1717	PF06985:Heterokaryon incompatibility protein (HET)	-	-	-	-	-	-	-	-	-	-	-	-0.18	1	-0.43	0.32	-0.39	0.58	-0.25	0.59	-0.8	0.017	-0.75	0.025
1718	PF12537:The Golgi pH Regulator (GPHR) Family N-terminal; PF12430:Abscisic acid G-protein coupled receptor	-	-	-	S	-	1.A.38.1.1	-	-	-	-	-	-0.039	1	-0.17	0.33	-0.48	0.0093	-0.13	0.47	1.2	2.6e-18	0.83	1.5e-10
1719	PF00083:Sugar (and other) transporter	-	-	-	S	Pentose and glucuronate interconversions	2.A.1.1.38	-	-	GO:0005351,sugar:hydrogen symporter activity; GO:0008643,carbohydrate transport; GO:0016020,membrane; GO:0005215,transporter activity; GO:0006810,transport; GO:0016021,integral to membrane; GO:0008733,L-arabinose isomerase activity	5.3.1.4	-	0.097	1	-1.7	6.9e-09	-0.35	0.59	-1.8	9.1e-10	0.35	0.26	1.7	2.7e-10
1720	-	-	-	-	-	-	-	-	-	GO:0000287,magnesium ion binding; GO:0008897,phosphopantetheinyltransferase activity; GO:0009059,macromolecule biosynthetic process	-	-	0.38	1	0.54	0.27	0.34	0.71	0.16	0.79	-1.4	0.00026	-1.5	3.4e-05
1721	PF00083:Sugar (and other) transporter; PF00083:Sugar (and other) transporter	-	-	-	S	Pentose and glucuronate interconversions	2.A.1.1.73	-	-	GO:0005351,sugar:hydrogen symporter activity; GO:0008643,carbohydrate transport; GO:0016020,membrane; GO:0005215,transporter activity; GO:0006810,transport; GO:0016021,integral to membrane; GO:0008733,L-arabinose isomerase activity	5.3.1.4	-	0.062	1	0.079	0.9	0.68	0.28	0.017	0.98	-2.8	4e-15	-2.2	1e-09
1722	-	-	-	-	S	-	-	-	-	-	-	-	0.29	1	-1.7	0.029	0.66	-	-1.9	0.013	-4	7.7e-12	-1.7	0.00071
1723	-	-	-	-	-	-	-	-	-	-	-	-	-	-	-	-	-	-	-	-	-	-	-	-
1724	-	-	-	-	-	-	-	-	-	-	-	-	0.12	1	-0.42	0.25	-0.29	0.66	-0.54	0.13	0.053	0.88	0.18	0.57
1725	-	-	-	-	S	-	-	-	-	-	-	-	0.34	1	0.84	0.078	-0.42	0.57	0.5	0.33	-1.1	0.0014	-2.4	8.8e-11
1726	-	-	-	-	S	-	-	-	-	-	-	-	-0.53	0.91	-0.16	0.8	0.021	-	0.37	0.49	-0.92	0.02	-0.73	0.075
1727	PF00067:Cytochrome P450	-	CYP50	-	S	Flavonoids, stilbene and lignin biosynthesis	-	-	-	GO:0004497,monooxygenase activity; GO:0005506,iron ion binding; GO:0006118,electron transport; GO:0020037,heme binding; GO:0016711,flavonoid 3'-monooxygenase activity	1.14.13.21	-	-0.38	0.8	-0.041	0.91	0.029	0.98	0.34	0.24	0.46	0.057	0.53	0.029
1728	-	-	-	-	S	-	-	-	-	-	-	-	-0.025	1	0.31	0.63	0.26	0.86	0.34	0.6	3.3	1.3e-13	3.2	3.3e-13
1729	-	-	-	-	-	-	-	-	-	-	-	-	-0.23	1	-0.87	0.026	-0.39	0.59	-0.64	0.099	-0.2	0.59	0.27	0.44
1730	PF11807:Domain of unknown function (DUF3328)	-	-	-	S	-	-	-	-	-	-	-	-0.22	1	-0.63	0.039	-0.45	0.31	-0.42	0.18	-0.34	0.2	-0.16	0.58
1731	PF06423:GWT1	-	-	-	-	-	-	-	-	GO:0005789,endoplasmic reticulum membrane; GO:0006506,GPI anchor biosynthetic process; GO:0016021,integral to membrane; GO:0016746,transferase activity, transferring acyl groups	2.3.-.-	-	-0.047	1	0.13	0.66	-0.16	0.77	0.18	0.53	-0.25	0.25	-0.53	0.0098
1732	-	-	-	-	-	-	-	-	-	-	-	-	-0.93	-	-0.41	-	-0.032	-	0.53	0.77	-0.93	0.43	-0.56	0.67
1733	PF02668:Taurine catabolism dioxygenase TauD, TfdA family	-	-	-	S	-	-	-	-	GO:0006118,electron transport; GO:0016491,oxidoreductase activity; GO:0043738,F420H2 dehydrogenase activity; GO:0043826,sulfur oxygenase reductase activity; GO:0043883,malolactic enzyme activity; GO:0051341,regulation of oxidoreductase activity	1.-.-.-	-	-0.065	1	1.2	0.0093	0.46	0.55	1.3	0.0058	-0.72	0.052	-1.5	0.00018
1734	-	-	-	-	-	-	-	-	-	-	-	-	-0.22	1	-0.57	0.19	0.19	0.88	-0.35	0.45	0.41	0.29	1.2	0.0014
1735	PF01565:FAD binding domain	-	-	-	S	-	-	-	-	GO:0016491,oxidoreductase activity; GO:0050660,FAD binding; GO:0003824,catalytic activity	-	-	-1.3	0.91	-2	0.082	-0.02	0.99	-0.71	0.61	4.3	7.3e-07	6.3	6.7e-13
1736	PF16884:N-terminal domain of oxidoreductase; PF00107:Zinc-binding dehydrogenase	-	-	-	-	-	-	-	-	GO:0003824,catalytic activity; GO:0005488,binding; GO:0008152,metabolic process; GO:0032440,2-alkenal reductase activity	1.3.1.74	-	-0.41	0.98	1.1	0.016	-0.35	0.7	1.5	0.00043	0.37	0.36	-1.1	0.0045
1737	PF00107:Zinc-binding dehydrogenase; PF16884:N-terminal domain of oxidoreductase	-	-	-	-	-	-	-	-	GO:0003824,catalytic activity; GO:0005488,binding; GO:0008152,metabolic process; GO:0032440,2-alkenal reductase activity	1.3.1.74	-	-1.2	0.024	-0.56	0.18	-0.17	0.88	0.61	0.13	-0.54	0.11	-0.15	0.69
[truncated: 7,525 more rows]

## Sheet: Enriched
Supplementary Data S2. Expanded gene families in F. radiculosa over five other brown rot fungi
Ortho ID	Odds ratio	P value	Spruce- 5Dv30D Up	Spruce- 5Dv30D Down	Pine- 5Dv30D Up	Pine- 5Dv30D Down	CAZy	Pfam	KEGG	Transporter	Protease	CYP450	Secondary metabolism	Secreted	TF	Fibra1	Daequ1	Fompi3	Laesu1	PosplRSB12_1	Wolco1
OG0000000	0	8.85787e-10	0	0	0	0	-	-	-	-	-	-	-	S	-	0	0	0	0	159	0
OG0000001	0.153044	0.000781364	0	0	0	0	-	-	-	-	-	-	-	S	-	2	1	5	2	82	1
[truncated: 10,626 more rows]

## Sheet: Orthogroups
Supplementary Data S3. Orthologous groups of F. radiculosa and five brown rot relatives. OrthoFinder 2.5.4 was used to infer orthology. Single-gene clusters are not displayed.
[truncated: 10,629 more rows]
